# Supplementary material for: ADMET evaluation in drug discovery. 20. Prediction of breast cancer resistance protein inhibition through machine learning
Source: J Cheminform. 2020 Mar 5;12:16. doi: 10.1186/s13321-020-00421-y (PMC7059329; doi:10.1186/s13321-020-00421-y)
Supplement: Supplementary file 1 — Additional file 1: Table S1. The detailed descriptions of the final dataset containing 1098 BCRP inhibitors and 1701 BCRP non-inhibitors. Table S2. The searching space of the Bayesian optimization and the optimal hyper-parameters determined by the Bayesian optimization for all the studied models; Table S3. The detailed descriptions of the 65 representative descriptors chosen by rfSA; Table S4. The detailed descriptions of the 79 representative fingerprints chosen by rfSA; Table S5. The detailed descriptions of the misclassified molecules given by the SVM mode1. [file 13321_2020_421_MOESM1_ESM.xlsx]

## Sheet: Table S1
Table S1. The detailed descriptions of the final data set containing 1098 BCRP inhibitors and 1701 BCRP non-inhibitors
No.	Smiles	Name	Activity Source	Acitivity Type	Reported Value	Classification
1	S(Oc1cc2CC[C@H]3[C@@H]4CC[C@H](O)[C@]4(CC[C@@H]3c2cc1)C)(=O)(=O)[O-]	Estradiol 3-sulfate	Suzuki_2003	IC50	14 uM	1
2	S(Oc1cc2OC(=O)C=C(c2cc1)C)(=O)(=O)[O-]	4-Methylumbelliferone sulfate	Suzuki_2003	IC50	6 uM	1
3	s1c2c(nc1NC)c(Cc1cccnc1)c(C)c(OS(=O)(=O)[O-])c2C	E3040 Sulfate	Suzuki_2003	IC50	10 uM	1
4	S(Oc1ccc([N+](=O)[O-])cc1)(=O)(=O)[O-]	p-nitrophenyl sulfate	Suzuki_2003	IC50	53 uM	1
5	S(=O)(=O)([O-])CCNC(=O)CC[C@@H](C)[C@H]1CC[C@H]2[C@H]3[C@H](CC[C@]12C)[C@@]1([C@@H](C[C@H](OS(=O)(=O)[O-])CC1)CC3)C	Taurolithocholate Sulfate	Suzuki_2003	IC50	37 uM	1
6	O1CC2=C(C=C3N(Cc4c3nc3c(cc(O)cc3)c4CC)C2=O)[C@@](O)(CC)C1=O	SN-38 103220117	Suzuki_2003 Feng_2009	IC50 reported by Montanari_2014	1.6 uM INHIBITOR	1
7	Oc1c2c(C(=O)c3c(C2=O)c(NCC[NH2+]CCO)ccc3NCC[NH2+]CCO)c(O)cc1	Mltoxantrone mitoxantrone	Suzuki_2003 Saito_2006	IC50 reported by Montanari_2014	61 uM INACTIVE	0
8	O1[C@@H](C)[C@@H](O)[C@@H]([NH3+])C[C@@H]1O[C@@H]1c2c(C[C@](O)(C1)C(=O)C)c(O)c1c(C(=O)c3c(cccc3OC)C1=O)c2O	Daunorubicin daunorubicin	Suzuki_2003 Saito_2006	IC50 reported by Montanari_2014	59 uM INACTIVE	0
9	O(C(=O)[C@H](CC)C)[C@@H]1[C@H]2C(=C[C@@H](O)C1)C=C[C@H](C)[C@@H]2CC[C@@H](O)C[C@@H](O)CC(=O)[O-]	Pravastatin Pravastatin	Suzuki_2003 Matsson_2007	Maximum concentration reported by Montanari_2014	1000 uM INACTIVE	0
10	S(=O)(=O)([O-])CCNC(=O)CC[C@@H](C)[C@H]1CC[C@H]2[C@H]3[C@H](C[C@H](O)[C@]12C)[C@@]1([C@@H](C[C@H](O)CC1)C[C@H]3O)C	Taurocholate	Suzuki_2003	Maximum concentration	150 uM	0
11	O=C(N[C@@H](CCC(=O)[O-])C(=O)[O-])c1ccc(N(Cc2nc3c(nc(nc3N)N)nc2)C)cc1	Methotrexate Methotrexate	Suzuki_2003 Matsson_2007	Maximum concentration reported by Montanari_2014	600 uM INACTIVE	0
12	O1[C@@H](C)[C@@H](O)[C@@H]([NH3+])C[C@@H]1O[C@@H]1c2c(C[C@](O)(C1)C(=O)CO)c(O)c1c(C(=O)c3c(cccc3OC)C1=O)c2O	Doxorubicin	Suzuki_2003	Maximum concentration	200 uM	0
13	O1c2c(ccc(O[C@@H]3O[C@H](C(=O)[O-])[C@@H](O)[C@H](O)[C@H]3O)c2)C(=CC1=O)C	4-Methylumbelliferone glucuronide 4-Methylumbelliferone glucuronide	Suzuki_2003 Matsson_2009	Maximum concentration reported by Montanari_2014	500 uM INACTIVE	0
14	s1c2c(nc1NC)c(Cc1cccnc1)c(C)c(O[C@@H]1O[C@H](C(=O)[O-])[C@@H](O)[C@H](O)[C@H]1O)c2C	E3040 Glucuronide	Suzuki_2003	Maximum concentration	250 uM	0
15	S([C@@H]([C@@H](O)CCCC(=O)[O-])\C=C\C=C\C=C/C\C=C/CCCCC)C[C@H](NC(=O)CC[C@H]([NH3+])C(=O)[O-])C(=O)NCC(=O)[O-]	leukotriene C4	Suzuki_2003	Maximum concentration	2 uM	0
16	S(C[C@H](NC(=O)CC[C@H]([NH3+])C(=O)[O-])C(=O)NCC(=O)[O-])c1ccc([N+](=O)[O-])cc1[N+](=O)[O-]	2,4-Dinitrophenyl-S-glutathione	Suzuki_2003	Maximum concentration	80 uM	0
17	O1[C@H](C(=O)[O-])[C@@H](O)[C@H](O)[C@@H](O)C1O[C@H]1CC[C@H]2[C@H]3[C@H](CC[C@]12C)c1c(cc(O)cc1)CC3	17beta-Estradiol-17beta-D-glucuronide	Suzuki_2003	Maximum concentration	75 uM	0
18	O=C[C@@H](NC(=O)N(N(C)C)Cc1ccccc1)Cc1ccccc1	(S)-1-Benzyl-3-(1-benzyl-2-oxo-ethyl)-1-dimethylamino-urea	Gros_2013	%inhibition at 10uM	0.081	0
19	O=C[C@@H](NC(=O)N(N1CCCCC1)Cc1ccccc1)Cc1ccccc1	(S)-1-Benzyl-3-(1-benzyl-2-oxo-ethyl)-1-piperidin-1-yl-urea	Gros_2013	%inhibition at 10uM	0.003	0
20	O1CCN(N(Cc2ccccc2)C(=O)N[C@@H](Cc2ccccc2)C=O)CC1	(S)-1-benzyl-1-morpholino-3-(1-oxo-3-phenylpropan-2-yl)-urea	Gros_2013	%inhibition at 10uM	0.033	0
21	Oc1ccc(cc1)C[C@H](NC(=O)N(N1CCCCC1)Cc1ccccc1)C=O	(S)-1-Benzyl-3-(1-(4-hydroxy)benzyl-2-oxo-ethyl)-1-piperidin-1-yl-urea	Gros_2013	%inhibition at 10uM	0.025	0
22	Oc1cc(ccc1)CN(N1CCCCC1)C(=O)N[C@@H](Cc1ccccc1)C=O	(S)-1-(3-hydroxy-benzyl)-3-(1-benzyl-2-oxo-ethyl)-1-piperidin-1-yl-urea	Gros_2013	%inhibition at 10uM	0.084	0
23	O(C)c1cc(ccc1)CN(N1CCCCC1)C(=O)N[C@@H](Cc1ccccc1)C=O	(S)-1-(3-methoxy-benzyl)-3-(1-benzyl-2-oxo-ethyl)-1-piperidin-1-yl-urea	Gros_2013	%inhibition at 10uM	0.081	0
24	O=C[C@@H](N(Cc1ccccc1)C(=O)N(N1CCCCC1)Cc1ccccc1)Cc1ccccc1	(S)-1,3-dibenzyl-1-(1-oxo-3-phenylpropan-2-yl)-3-(piperidin-1-yl)urea	Gros_2013	%inhibition at 10uM	0.088	0
25	O(C)c1cc2[nH]c3c(C[C@@H]4N([C@H]3CC(C)C)C(=O)[C@@H](NC4=O)CCC(OC(C)(C)C)=O)c2cc1	Ko143 Ko143 Ko143 Ko143 Ko143 Ko143 Ko143 Ko143 Ko143 Ko143 Ko143 Ko143 Ko143 Ko143 Ko143 Ko143 Ko143 Ko143 Ko143 CHEMBL488910 CHEMBL488910 Ko143	Gros_2013 Juvale_2013 Tan_2013 Juvale_2013_2 Krapf_2018 Koehler_2018 Krapf_2017 Krapf_2017_2 Spindler_2016 Pires_2016 Krapf_2016 Kraege_2016 Kraege_2016_3 Kraege_2016 Gozzi_2015 Gozzi_2015_2 Schexnayder_2016 Revalde_2015 Gu_2014 Ochoa-Puentes_2013 winter_2013 Matsson_2007	%inhibition at 2uM IC50 mitoxantrone accumulation (%) IC50 IC50 IC50 IC50 IC50 IC50 EC50 (uM) IC50 (uM) IC50 (uM) IC50 (uM) IC50 (uM) IC50 (uM) IC50 (uM) EC50 (uM) IC50 (uM) mitoxantrone accumulation (%) IC50(uM) EC50（uM） reported by Montanari_2014	1 0.215 uM 1.897 0.25 uM 0.227 uM 0.221 uM 0.227 uM 0.227 0.221 0.074 0.221 0.276 0.24 0.221 0.09 0.09 29 0.025 330 0.117 0.07 INHIBITOR	1
26	Clc1ccc(cc1C(=O)NCC12CC3CC(C1)CC(C2)C3)CCC[NH2+]CCCO	AZD9056	Elsby_2011	IC50	32 uM	1
27	O(C)c1cc(ccc1OC)\C=C\C(=O)c1ccc(cc1)C(=O)\C=C\c1cc(OC)c(OC)cc1	(2E,2'E)-1,1'-(1,4-Phenylene)bis(3-(3,4-dimethoxyphenyl)-prop-2-en-1-one)	Winter_2014	EC50	2.1 uM	1
28	O(C)c1ccc(OC)cc1\C=C\C(=O)c1ccc(cc1)C(=O)\C=C\c1cc(OC)ccc1OC	(2E,2'E)-1,1'-(1,4-Phenylene)bis(3-(2,5-dimethoxyphenyl)-prop-2-en-1-one)	Winter_2014	EC50	0.70 uM	1
29	O(C)c1cc(OC)c(OC)cc1\C=C\C(=O)c1ccc(cc1)C(=O)\C=C\c1cc(OC)c(OC)cc1OC	(2E,2'E)-1,1'-(1,4-Phenylene)bis(3-(2,4,5-trimethoxyphenyl)-prop-2-en-1-one)	Winter_2014	EC50	0.30 uM	1
30	O(C)c1cc(OC)cc(OC)c1\C=C\C(=O)c1ccc(cc1)C(=O)\C=C\c1c(OC)cc(OC)cc1OC	(2E,2'E)-1,1'-(1,4-Phenylene)bis(3-(2,4,6-trimethoxyphenyl)-prop-2-en-1-one)	Winter_2014	EC50	0.40 uM	1
31	O(C)c1cccc(OC)c1\C=C\C(=O)c1ccc(cc1)C(=O)\C=C\c1c(OC)cccc1OC	(2E,2'E)-1,1'-(1,4-Phenylene)bis(3-(2,6-dimethoxyphenyl)-prop-2-en-1-one)	Winter_2014	EC50	0.20 uM	1
32	O(C)c1c(OC)c(OC)ccc1\C=C\C(=O)c1ccc(cc1)C(=O)\C=C\c1ccc(OC)c(OC)c1OC	(2E,2'E)-1,1'-(1,4-Phenylene)bis(3-(2,3,4-trimethoxyphenyl)-prop-2-en-1-one)	Winter_2014	EC50	1.4 uM	1
33	O(C)c1c(OC)cc(cc1OC)C(=O)\C=C\c1ccc(cc1)\C=C\C(=O)c1cc(OC)c(OC)c(OC)c1	(2E,2'E)-3,3'-(1,4-Phenylene)bis(1-(3,4,5-trimethoxyphenyl)-prop-2-en-1-one)	Winter_2014	EC50	1.1 uM	1
34	O(C)c1cc(ccc1OC)C(=O)\C=C\c1ccc(cc1)\C=C\C(=O)c1cc(OC)c(OC)cc1	(2E,2'E)-3,3'-(1,4-Phenylene)bis(1-(3,4-dimethoxyphenyl)-prop-2-en-1-one)	Winter_2014	EC50	0.8 uM	1
35	O(C)c1cc(OC)ccc1C(=O)\C=C\c1ccc(cc1)\C=C\C(=O)c1ccc(OC)cc1OC	(2E,2'E)-3,3'-(1,4-Phenylene)bis(1-(2,4-dimethoxyphenyl)-prop-2-en-1-one)	Winter_2014	EC50	0.9 uM	1
36	O(C)c1ccc(OC)cc1C(=O)\C=C\c1ccc(cc1)\C=C\C(=O)c1cc(OC)ccc1OC	(2E,2'E)-3,3'-(1,4-Phenylene)bis(1-(2,5-dimethoxyphenyl)-prop-2-en-1-one)	Winter_2014	EC50	1.3 uM	1
37	O(C)c1cc(cc(OC)c1)C(=O)\C=C\c1ccc(cc1)\C=C\C(=O)c1cc(OC)cc(OC)c1	(2E,2'E)-3,3'-(1,4-Phenylene)bis(1-(3,5-dimethoxyphenyl)-prop-2-en-1-one)	Winter_2014	EC50	0.5 uM	1
38	O(C)c1ccccc1C(=O)\C=C\c1ccc(cc1)\C=C\C(=O)c1ccccc1OC	(2E,2'E)-3,3'-(1,4-Phenylene)bis(1-(2-methoxyphenyl)prop-2-en-1-one)	Winter_2014	EC50	1.1 uM	1
39	O(C)c1cc(OC)cc(OC)c1C(=O)\C=C\c1ccc(cc1)\C=C\C(=O)c1c(OC)cc(OC)cc1OC	(2E,2'E)-3,3'-(1,4-Phenylene)bis(1-(2,4,6-trimethoxyphenyl)-prop-2-en-1-one)	Winter_2014	EC50	1.8 uM	1
40	O(C)c1cccc(OC)c1C(=O)\C=C\c1ccccc1	2',6'-Dimethoxychalcone	Valdameri_2012	%inhibition at 10 uM	0.026	0
41	O(C)c1cccc(OC)c1C(=O)\C=C\c1ccccc1OC	2,2',6'-Trimethoxychalcone	Valdameri_2012	%inhibition at 10 uM	0.007	0
42	O(C)c1cccc(OC)c1C(=O)\C=C\c1cc(OC)ccc1	3, 2',6'-Trimethoxychalcone	Valdameri_2012	%inhibition at 10 uM	0.019	0
43	O(C)c1cccc(OC)c1C(=O)\C=C\c1c(OC)cccc1OC	2,2',6,6'-Tetramethoxychalcone	Valdameri_2012	%inhibition at 10 uM	0.067	0
44	O(C)c1cccc(OC)c1C(=O)\C=C\c1c(OC)cc(OC)cc1OC	2,2',4,6,6'-Pentamethoxychalcone	Valdameri_2012	%inhibition at 10 uM	0.183	0
45	O(C)c1c(OC)c(OC)ccc1\C=C\C(=O)c1c(OC)cccc1OC	2',4,5,6,6'-Pentamethoxychalcone	Valdameri_2012	%inhibition at 10 uM	0.094	0
46	O(C)c1cccc(OC)c1C(=O)\C=C\c1cc(OC)c(OC)cc1OC	2,2',4,5,6'-Pentamethoxychalcone	Valdameri_2012	%inhibition at 10 uM	0.189	0
47	O(CC)c1cccc(OCC)c1C(=O)\C=C\c1c(OC)cc(OC)cc1OC	2',6'-Diethoxy-2,4,6-trimethoxychalcone	Valdameri_2012	%inhibition at 10 uM	0.551	1
48	O(CC)c1cccc(OCC)c1C(=O)\C=C\c1c(OC)cccc1OC	2',6'-Diethoxy-2,6-dimethoxychalcone	Valdameri_2012	%inhibition at 10 uM	0.174	0
49	O(C)c1cc(OC)ccc1C(=O)\C=C\c1ccc(OC)cc1OC	2',4,4',6-Tetramethoxychalcone	Valdameri_2012	%inhibition at 10 uM	0.553	1
50	O(C)c1cc(OC)cc(OC)c1C(=O)\C=C\c1c(OC)cc(OC)cc1OC	2,2',4,4',6,6'-Hexamethoxychalcone	Valdameri_2012	%inhibition at 10 uM	0.718	1
51	O(C)c1cc(OC)cc(OC)c1C(=O)\C=C\c1ccc(OC)cc1OC	2,2',4,4',6'-Pentamethoxychalcone	Valdameri_2012	%inhibition at 10 uM	0.543	1
52	O(C)c1cc(OC)cc(OC)c1C(=O)\C=C\c1c(OC)cccc1OC	2,2',4',6,6'-Pentamethoxychalcone	Valdameri_2012	%inhibition at 10 uM	0.157	0
53	O(CC)c1cc(OCC)cc(OCC)c1C(=O)\C=C\c1c(OCC)cc(OCC)cc1OCC	2,2',4, 4',6,6'-Hexaethoxychalcone	Valdameri_2012	%inhibition at 10 uM	0.55	1
54	O(C)c1cc(cc(OC)c1)\C=C\C(=O)c1ccc(OC)cc1O	2'-Hydroxy-3,4',5-trimethoxychalcone	Valdameri_2012	%inhibition at 10 uM	0.632	1
55	O(C)c1c(OC)c(OC)ccc1\C=C\C(=O)c1ccc(OC)cc1O	2'-Hydroxy-4,4',5,6-tetramethoxychalcone	Valdameri_2012	%inhibition at 10 uM	0.597	1
56	O(C)c1cc(ccc1OC)\C=C\C(=O)c1ccc(OC)cc1O	2'-Hydroxy-4,4',5-trimethoxychalcone 103566924	Valdameri_2012 Juvale_2012	%inhibition at 10 uM reported by Montanari_2014	0.765 INHIBITOR	1
57	O(C)c1cc(OC)cc(OC)c1\C=C\C(=O)c1ccc(OC)cc1O	2'-Hydroxy-2,4,4',6-tetramethoxychalcone	Valdameri_2012	%inhibition at 10 uM	0.684	1
58	O(C)c1c(OC)cc(cc1OC)\C=C\C(=O)c1ccc(OC)cc1O	2'-Hydroxy-3,4,4',5-tetramethoxychalcone	Valdameri_2012	%inhibition at 10 uM	1.012	1
59	O(C)c1cccc(OC)c1\C=C\C(=O)c1ccc(OC)cc1O	2'-Hydroxy-2,4',6-trimethoxychalcone	Valdameri_2012	%inhibition at 10 uM	0.793	1
60	O(C)c1cc(OC)ccc1\C=C\C(=O)c1ccc(OC)cc1O	2'-Hydroxy-4,4',6-trimethoxychalcone	Valdameri_2012	%inhibition at 10 uM	0.547	1
61	O(C)c1cc(OC)cc(O)c1C(=O)\C=C\c1cc(OC)cc(OC)c1	2'-Hydroxy-3,4',5,6'-tetramethoxychalcone	Valdameri_2012	IC50	0.17 uM	1
62	O(C)c1cc(OC)cc(O)c1C(=O)\C=C\c1ccccc1	2'-Hydroxy-4',6'-dimethoxychalcone	Valdameri_2012	%inhibition at 10 uM	0.604	1
63	O(C)c1cc(OC)cc(O)c1C(=O)\C=C\c1ccccc1OC	2'-Hydroxy-2,4',6'-trimethoxychalcone	Valdameri_2012	%inhibition at 10 uM	0.931	1
64	O(C)c1cc(OC)cc(O)c1C(=O)\C=C\c1cc(OC)ccc1	2'-Hydroxy-3,4',6'-trimethoxychalcone	Valdameri_2012	IC50	0.26 uM	1
65	O(C)c1cc(OC)cc(O)c1C(=O)\C=C\c1c(OC)cc(OC)cc1OC	2'-Hydroxy-2,4,4',6,6'-pentamethoxychalcone	Valdameri_2012	%inhibition at 10 uM	0.9	1
66	O(C)c1c(OC)cc(cc1OC)\C=C\C(=O)c1c(OC)cc(OC)cc1O	2'-Hydroxy-3,4,4',5,6'-pentamethoxychalcone	Valdameri_2012	%inhibition at 10 uM	0.849	1
67	O(C)c1c(OC)c(OC)ccc1\C=C\C(=O)c1c(OC)cc(OC)cc1O	2'-Hydroxy-4,4',5,6,6'-pentamethoxychalcone	Valdameri_2012	%inhibition at 10 uM	0.95	1
68	O(C)c1cc(OC)ccc1\C=C\C(=O)c1c2c(n(c1)C)cccc2	3-(2,4-Dimethoxyphenyl)-1-(1-methyl-1H-indol-3-yl)prop-2-en-1-one	Valdameri_2012	%inhibition at 10 uM	1.075	1
69	O(C)c1c(OC)cc(cc1OC)\C=C\C(=O)c1c2c(n(c1)C)cccc2	3-(3,4,5-Trimethoxyphenyl)-1-(1-methyl-1H-indol-3-yl)prop-2-en-1-one	Valdameri_2012	%inhibition at 10 uM	0.7	1
70	O(C)c1cc(OC)cc(OC)c1\C=C\C(=O)c1c2c(n(c1)C)cccc2	3-(2,4,6-Trimethoxyphenyl)-1-(1-methyl-1H-indol-3-yl)prop-2-en-1-one	Valdameri_2012	IC50	0.45 uM	1
71	O(C)c1cccc(OC)c1\C=C\C(=O)c1c2c(n(c1)C)cccc2	3-(2,6-Dimethoxyphenyl)-1-(1-methyl-1H-indol-3-yl)prop-2-en-1-one	Valdameri_2012	IC50	0.27 uM	1
72	O(C)c1cc(OC)cc(OC)c1\C=C\C(=O)c1c2cc(OC)ccc2n(c1)C	1-(5-Methoxy-1-methyl-1H-indol-3-yl)-3-(2,4,6-trimethoxyphenyl)prop-2-en-1-one	Valdameri_2012	IC50	0.35 uM	1
73	O(C)c1cc(OC)ccc1C(=O)\C=C\c1c2c(n(c1)C)cccc2	1-(2,4-Dimethoxyphenyl)-3-(1-methyl-1H-indol-3-yl)prop-2-en-1-one	Valdameri_2012	%inhibition at 10 uM	1.247	1
74	O(C)c1ccc(cc1)C(=O)\C=C\c1c2c(n(c1)C)cccc2	1-(4-Methoxyphenyl)-3-(1-methyl-1H-indol-3-yl)prop-2-en-1-one	Valdameri_2012	%inhibition at 10 uM	0.89	1
75	O(C)c1cccc(OC)c1C(=O)\C=C\c1c2c(n(c1)C)cccc2	1-(2,6-Dimethoxyphenyl)-3-(1-methyl-1H-indol-3-yl)prop-2-en-1-one	Valdameri_2012	%inhibition at 10 uM	0.174	0
76	O=C(\C=C\c1c2c(n(c1)C)cccc2)c1c2c(n(c1)C)cccc2	1,3-Bis(1-methyl-1H-indol-3-yl)prop-2-en-1-one	Valdameri_2012	%inhibition at 10 uM	0.988	1
77	O(C)c1cc(OC)cc(O)c1C(=O)\C=C\c1c(OC)cccc1OC	2'-Hydroxy-2,4',6,6'-tetramethoxychalcone	Valdameri_2012	IC50	0.35 uM	1
78	Brc1cc(cc(Br)c1OC)\C=C\NC(=O)/C(/OC)=C/c1ccc(O)cc1	(Z)-N-((E)-3,5-dibromo-4-methoxystyryl)-3-(4-hydroxyphenyl)-2-methoxyacrylamide	Henrich_2009	IC50	33.4 uM	1
79	Brc1cc(cc(Br)c1OC)\C=C\NC(=O)/C(/OC)=C\c1ccc(O)cc1	(E)-N-((E)-3,5-dibromo-4-methoxystyryl)-3-(4-hydroxyphenyl)-2-methoxyacrylamide	Henrich_2009	IC50	11.2 uM	1
80	Brc1cc(ccc1OC)\C=C\NC(=O)/C(/OC)=C/c1ccc(O)cc1	(Z)-N-((E)-3-bromo-4-methoxystyryl)-3-(4-hydroxyphenyl)-2-methoxyacrylamide	Henrich_2009	IC50	not active	0
81	Brc1cc(ccc1OC)\C=C\NC(=O)/C(/OC)=C\c1ccc(O)cc1	(E)-N-((E)-3-bromo-4-methoxystyryl)-3-(4-hydroxyphenyl)-2-methoxyacrylamide	Henrich_2009	IC50	16.4 uM	1
82	O(C)c1ccc(cc1)\C=C\NC(=O)/C(/OC)=C/c1ccc(O)cc1	(Z)-3-(4-hydroxyphenyl)-2-methoxy-N-((E)-4-methoxystyryl)acrylamide	Henrich_2009	IC50	23.3 uM	1
83	Oc1ccc(cc1)\C=C(/OC)\C(=O)N\C=C\c1ccc(O)cc1	(Z)-3-(4-hydroxyphenyl)-N-((E)-4-hydroxystyryl)-2-methoxyacrylamide	Henrich_2009	IC50	16.7 uM	1
84	Brc1cc(cc(Br)c1O)\C=C\NC(=O)/C(/OC)=C/c1ccc(O)cc1	(Z)-N-((E)-3,5-dibromo-4-hydroxystyryl)-3-(4-hydroxyphenyl)-2-methoxyacrylamide	Henrich_2009	IC50	6.9 uM	1
85	O(C)c1ccc(cc1)\C=C\NC(=O)/C(/OC)=C\c1ccc(O)cc1	(E)-3-(4-hydroxyphenyl)-2-methoxy-N-((E)-4-methoxystyryl)acrylamide	Henrich_2009	IC50	41.4 uM	1
86	Oc1cccc(\C=C(\O)/C(=O)N\C=C\c2ccc(O)cc2)c1[N+]#[C-]	(E)-2-hydroxy-3-(3-hydroxy-2-isocyanophenyl)-N-((E)-4-hydroxystyryl)acrylamide	Henrich_2009	IC50	not active	0
87	O(C)c1cc2[nH]c3c(C[C@@H]4N([C@H]3\C=C(\C)/C)C(=O)[C@H]3N(CCC3)C4=O)c2cc1	Fumitremorgin C Fumitremorgin C Fumitremorgin C CHEMBL410316 Fumitremorgin C 103569340	Henrich_2009 Han_2008 Gujarati_2017 Ochoa-Puentes_2013 Schmitt_2016_2 Versiani_2011	IC50 mitoxantrone accumulation (%) Fold Resistance (10 uM) IC50(uM) IC50(uM) reported by Montanari_2014	0.79 uM 3.469 1.49 0.731 0.96 INHIBITOR	1
88	O1c2c(C(=O)C(O)=C1c1cc(O)c(OC)cc1)c(O)c(OC)c(OC)c2	Eupatin	Henrich_2006	IC50	2.2 uM	1
89	O1c2c(C(=O)C(O)=C1c1cc(O)c(OC)cc1)c(OC)c(OC)c(OC)c2	eupatoretin	Henrich_2006			1
90	O1C(CO)C(O)C(O)C(O)C1Oc1cc(O)c2c(OC(=CC2=O)c2ccc(O)cc2)c1	cosmosiin	Henrich_2006			1
91	O1c2c(cccc2)C(=O)C(O)=C1c1ccc(OC)cc1	3-Hydroxy-2-(4-methoxyphenyl)-4H-chromen-4-one	Juvale_2013	IC50	ne	0
92	O1c2c(ccc(OC)c2)C(=O)C(O)=C1c1ccc(OC)cc1	3-Hydroxy-7-methoxy-2-(4-methoxyphenyl)-4H-chromen-4-one	Juvale_2013	IC50	ne	0
93	O1c2c(ccc(OC)c2)C(=O)C(O)=C1c1cc(OC)c(OC)cc1	2-(3,4-Dimethoxyphenyl)-3-hydroxy-7-methoxy-4H-chromen-4-one	Juvale_2013	IC50	1.01 uM	1
94	O1c2c(cccc2)C(=O)C(OC)=C1c1ccccc1	3-Methoxy-2-phenyl-4H-chromen-4-one	Juvale_2013	IC50	1.21 uM	1
95	O1c2c(cccc2)C(=O)C(OC)=C1c1ccc(OC)cc1	3-Methoxy-2-(4-methoxyphenyl)-4H-chromen-4-one	Juvale_2013	IC50	7.74 uM	1
96	O1c2c(cccc2)C(=O)C(OC)=C1c1cc(OC)c(OC)cc1	2-(3,4-Dimethoxyphenyl)-3-methoxy-4H-chromen-4-one	Juvale_2013	IC50	1.18 uM	1
97	O1c2c(ccc(OC)c2)C(=O)C(OC)=C1c1cc(OC)c(OC)cc1	2-(3,4-Dimethoxyphenyl)-3,7-dimethoxy-4H-chromen-4-one	Juvale_2013	IC50	1.18 uM	1
98	O1c2c(C(=O)C(OC)=C1c1cc(OC)c(OC)cc1)c(OC)cc(OC)c2	2-(3,4-Dimethoxyphenyl)-3,5,7-trimethoxy-4H-chromen-4-one	Juvale_2013	IC50	0.822 uM	1
99	O1c2c(C(=O)C(OC)=C1c1ccc(OC)cc1OC)c(OC)cc(OC)c2	2-(2,4-Dimethoxyphenyl)-3,5,7-trimethoxy-4H-chromen-4-one	Juvale_2013	IC50	5.98 uM	1
100	O1c2c(C(=O)C(OC)=C1c1cc(OC)c(OC)cc1)c(O)cc(OC)c2	2-(3,4-Dimethoxyphenyl)-5-hydroxy-3,7-dimethoxy-4H-chromen-4-one Retusin	Juvale_2013 Pick_2011	IC50 reported by Montanari_2014	0.540 uM INHIBITOR	1
101	O1c2c(C(=O)C(OC)=C1c1ccc(OC)cc1OC)c(O)cc(OC)c2	2-(2,4-Dimethoxyphenyl)-5-hydroxy-3,7-dimethoxy-4H-chromen-4-one	Juvale_2013	IC50	3.27 uM	1
102	O1c2c(ccc3c2cccc3)C(=O)C=C1c1ccccc1	2-Phenyl-4H-benzo[h]chromen-4-one 11790 7,8-Benzoflavone	Juvale_2013 Sjostedt_2017 flavonoids_Zhang_2005	IC50 transport value（%） reported by Montanari_2014	1.31 uM 12 INHIBITOR	1
103	O1c2c(ccc3c2cccc3)C(=O)C=C1c1ccc(OC)cc1	2-(4-Methoxyphenyl)-4H-benzo[h]chromen-4-one	Juvale_2013	IC50	1.28 uM	1
104	O1c2c(ccc3c2cccc3)C(=O)C=C1c1cc(OC)c(OC)cc1	2-(3,4-Dimethoxyphenyl)-4H-benzo[h]chromen-4-one	Juvale_2013	IC50	1.23 uM	1
105	Fc1ccc(cc1OC)C=1Oc2c(ccc3c2cccc3)C(=O)C=1	2-(4-Fluoro-3-methoxyphenyl)-4H-benzo[h]chromen-4-one	Juvale_2013	IC50	0.522 uM	1
106	O1c2c(ccc3c2cccc3)C(=O)C(O)=C1c1ccccc1	3-Hydroxy-2-phenyl-4H-benzo[h]chromen-4-One	Juvale_2013	IC50	2.89 uM	1
107	O1c2c(ccc3c2cccc3)C(=O)C(O)=C1c1ccc(OC)cc1	3-Hydroxy-2-(4-methoxyphenyl)-4H-benzo[h]chromen-4-one	Juvale_2013	IC50	6.93 uM	1
108	O1c2c(ccc3c2cccc3)C(=O)C(O)=C1c1cc(OC)c(OC)cc1	2-(3,4-Dimethoxyphenyl)-3-hydroxy-4H-benzo[h]chromen-4-one	Juvale_2013	IC50	0.724 uM	1
109	O1c2c(ccc3c2cccc3)C(=O)C(OC)=C1c1ccccc1	3-Methoxy-2-phenyl-4H-benzo[h]chromen-4-one	Juvale_2013	IC50	2.71 uM	1
110	O1c2c(ccc3c2cccc3)C(=O)C(OC)=C1c1ccc(OC)cc1	3-Methoxy-2-(4-methoxyphenyl)-4H-benzo[h]chromen-4-one	Juvale_2013	IC50	1.06 uM	1
111	O1c2c(ccc3c2cccc3)C(=O)C(OC)=C1c1cc(OC)c(OC)cc1	2-(3,4-Dimethoxyphenyl)-3-methoxy-4H-benzo[h]chromen-4-one	Juvale_2013	IC50	0.426 uM	1
112	Fc1ccc(cc1OC)C=1Oc2c(ccc3c2cccc3)C(=O)C=1OC	2-(4-Fluoro-3-methoxyphenyl)-3-methoxy-4H-benzo[h]chromen-4-one	Juvale_2013	IC50	2.44 uM	1
113	O1c2c(c3c(cc2)cccc3)C(=O)C=C1c1ccccc1	3-phenyl-1H-benzo[f]chromen-1-one	Juvale_2013	IC50	8.32 uM	1
114	O1c2c(c3c(cc2)cccc3)C(=O)C=C1c1ccc(OC)cc1	3-(4-Methoxyphenyl)-1H-benzo[f]chromen-1-one	Juvale_2013	IC50	2.46 uM	1
115	O1c2c(c3c(cc2)cccc3)C(=O)C=C1c1cc(OC)c(OC)cc1	3-(3,4-Dimethoxyphenyl)-1H-benzo[f]chromen-1-one	Juvale_2013	IC50	0.590 uM	1
116	O1c2c(c3c(cc2)cccc3)C(=O)C(O)=C1c1ccc(OC)cc1	2-Hydroxy-3-(4-methoxyphenyl)-1H-benzo[f]chromen-1-One	Juvale_2013	IC50	8.93 uM	1
117	O1c2c(c3c(cc2)cccc3)C(=O)C(O)=C1c1cc(OC)c(OC)cc1	3-(3,4-Dimethoxyphenyl)-2-hydroxy-1H-benzo[f]chromen-1-one	Juvale_2013	IC50	6.12 uM	1
118	O1c2c(c3c(cc2)cccc3)C(=O)C(OC)=C1c1ccc(OC)cc1	2-Methoxy-3-(4-methoxyphenyl)-1H-benzo[f]chromen-1-one	Juvale_2013	IC50	3.07 uM	1
119	O1c2c(c3c(cc2)cccc3)C(=O)C(OC)=C1c1cc(OC)c(OC)cc1	3-(3,4-Dimethoxyphenyl)-2-methoxy-1H-benzo[f]chromen-1-one	Juvale_2013	IC50	4.27 uM	1
120	O(C)c1cc(O)c(C\C=C(\C)/C)c(O)c1C(=O)\C=C\c1ccc(O)cc1	xanthohumol	Kee_2014	mitoxantrone accumulation (%)	1.4-1.6 fold	1
121	O1c2c(C(=O)CC1c1ccc(O)cc1)c(OC)cc(O)c2C\C=C(\C)/C	isoxanthohumol	Kee_2014	mitoxantrone accumulation (%)	1.4-1.6 fold	1
122	O1c2c(C(=O)C[C@H]1c1ccc(O)cc1)c(O)cc(O)c2C\C=C(\C)/C	8-prenylnaringenin 103503862	Kee_2014 Versiani_2011	mitoxantrone accumulation (%) reported by Montanari_2014	1.4-1.6 fold INHIBITOR	1
123	O1c2c(c(O)c(C\C=C(\C)/C)c(O)c2)C(=O)C[C@H]1c1ccc(O)cc1	6-prenylnaringenin	Kee_2014	mitoxantrone accumulation (%)	1.4-1.6 fold	1
124	O1c2c(c(O)c(C\C=C(\C)/C)c(O)c2C\C=C(\C)/C)C(=O)C[C@H]1c1ccc(O)cc1	6,8-diprenylnaringenin	Kee_2014	mitoxantrone accumulation (%)	1.4-1.6 fold	1
125	O=C(Nc1ccccc1-c1nn(nn1)-c1ccc(cc1)CCC)c1ccc([N+](=O)[O-])cc1	4-Nitro-N-(2-(2-(4-propylphenyl)-2H-tetrazol-5-yl)phenyl)-benzamide	Kohler_2015	IC50	0.184 uM	1
126	FC(F)(F)c1ccc(-n2nc(nn2)-c2ccccc2NC(=O)c2ccc([N+](=O)[O-])cc2)cc1	4-Nitro-N-(2-(2-(4-(trifluoromethyl)phenyl)-2H-tetrazol-5-yl)-phenyl)benzamide	Kohler_2015	IC50	ne	0
127	O=C(Nc1ccccc1-c1nn(nn1)-c1ccc(cc1)C)c1ccc([N+](=O)[O-])cc1	N-(2-(2-(4-Methylphenyl)-2H-tetrazol-5-yl)phenyl)-4-nitrobenzamide	Kohler_2015	IC50	0.100 uM	1
128	O(CC)c1ccc(-n2nc(nn2)-c2ccccc2NC(=O)c2ccc([N+](=O)[O-])cc2)cc1	N-(2-(2-(4-Ethoxyphenyl)-2H-tetrazol-5-yl)phenyl)-4-nitrobenzamide	Kohler_2015	IC50	ne	0
129	O(C)c1ccccc1-n1nc(nn1)-c1ccccc1NC(=O)c1ccc([N+](=O)[O-])cc1	N-(2-(2-(2-Methoxyphenyl)-2H-tetrazol-5-yl)phenyl)-4-nitrobenzamide	Kohler_2015	IC50	0.261 uM	1
130	O(C)c1cc(-n2nc(nn2)-c2ccccc2NC(=O)c2ccc([N+](=O)[O-])cc2)ccc1	N-(2-(2-(3-Methoxyphenyl)-2H-tetrazol-5-yl)phenyl)-4-nitrobenzamide	Kohler_2015	IC50	0.0789 uM	1
131	O(C)c1ccc(-n2nc(nn2)-c2ccccc2NC(=O)c2ccc([N+](=O)[O-])cc2)cc1	N-(2-(2-(4-Methoxyphenyl)-2H-tetrazol-5-yl)phenyl)-4-nitrobenzamide	Kohler_2015	IC50	0.118 uM	1
132	FC(F)(F)c1ccc(cc1)C(=O)Nc1ccccc1-c1nn(nn1)-c1ccc(cc1)CCC	N-(2-(2-(4-propylphenyl)-2H-tetrazol-5-yl)phenyl)-4-(trifluoromethyl)benzamide	Kohler_2015	IC50	ne	0
133	FC(F)(F)c1ccc(cc1)C(=O)Nc1ccccc1-c1nn(nn1)-c1ccc(cc1)C(F)(F)F	4-(Trifluoromethyl)-N-(2-(2-(4-(trifluoromethyl)phenyl)-2H-tetrazol-5-yl)phenyl)benzamide	Kohler_2015	IC50	ne	0
134	FC(F)(F)c1ccc(cc1)C(=O)Nc1ccccc1-c1nn(nn1)-c1ccc(cc1)C	N-(2-(2-(4-Methylphenyl)-2H-tetrazol-5-yl)phenyl)-4-(trifluoromethyl)benzamide	Kohler_2015	IC50	0.137 uM	1
135	FC(F)(F)c1ccc(cc1)C(=O)Nc1ccccc1-c1nn(nn1)-c1ccc(OCC)cc1	N-(2-(2-(4-Ethoxyphenyl)-2H-tetrazol-5-yl)phenyl)-4-(trifluoromethyl)benzamide	Kohler_2015	IC50	ne	0
136	FC(F)(F)c1ccc(cc1)C(=O)Nc1ccccc1-c1nn(nn1)-c1ccccc1OC	N-(2-(2-(2-Methoxyphenyl)-2H-tetrazol-5-yl)phenyl)-4-(trifluoromethyl)benzamide	Kohler_2015	IC50	0.451 uM	1
137	FC(F)(F)c1ccc(cc1)C(=O)Nc1ccccc1-c1nn(nn1)-c1ccc(OC)cc1	N-(2-(2-(4-Methoxyphenyl)-2H-tetrazol-5-yl)phenyl)-4-(trifluoromethyl)benzamide	Kohler_2015	IC50	0.106 uM	1
138	FC(F)(F)c1ccc(-n2nc(nn2)-c2ccccc2NC(=O)c2cc(OC)c(OC)cc2)cc1	3,4-Dimethoxy-N-(2-(2-(4-(trifluoromethyl)phenyl)-2H-tetrazol-5-yl)phenyl)benzamide	Kohler_2015	IC50	0.269 uM	1
139	O(C)c1cc(ccc1OC)C(=O)Nc1ccccc1-c1nn(nn1)-c1ccc(OCC)cc1	N-(2-(2-(4-Ethoxyphenyl)-2H-tetrazol-5-yl)phenyl)-3,4-dimethoxybenzamide	Kohler_2015	IC50	0.201 uM	1
140	O(C)c1cc(ccc1OC)C(=O)Nc1ccccc1-c1nn(nn1)-c1ccc(OC)cc1	3,4-Dimethoxy-N-(2-(2-(4-methoxyphenyl)-2H-tetrazol-5-yl)-phenyl)benzamide	Kohler_2015	IC50	0.117 uM	1
141	FC(F)(F)c1ccc(-n2nc(nn2)-c2ccccc2NC(=O)c2ccc(OC)cc2)cc1	4-Methoxy-N-(2-(2-(4-(trifluoromethyl)phenyl)-2H-tetrazol-5-yl)-phenyl)benzamide	Kohler_2015	IC50	0.0730 uM	1
142	O(C)c1ccccc1-n1nc(nn1)-c1ccccc1NC(=O)c1ccc(OC)cc1	4-Methoxy-N-(2-(2-(2-methoxyphenyl)-2H-tetrazol-5-yl)phenyl)-benzamide	Kohler_2015	IC50	0.180 uM	1
143	O(C)c1ccc(cc1)C(=O)Nc1ccccc1-c1nn(nn1)-c1ccc(cc1)CCC	4-Methoxy-N-(2-(2-(4-propylphenyl)-2H-tetrazol-5-yl)phenyl)-benzamide	Kohler_2015	IC50	0.0642 uM	1
144	O(C)c1ccc(-n2nc(nn2)-c2ccccc2NC(=O)c2ccc(cc2)CCC)cc1	N-(2-(2-(4-Methoxyphenyl)-2H-tetrazol-5-yl)phenyl)-4-propylbenzamide	Kohler_2015	IC50	0.0794 uM	1
145	O(C)c1ccc(cc1)C(=O)\C=C\c1cc2nccnc2cc1	(E)-1-(4-methoxyphenyl)-3-(quinoxalin-6-yl)prop-2-en-1-one	Winter&Gozzi_2014	IC50	2.8 uM	1
146	O(C)c1ccc(OC)cc1C(=O)\C=C\c1cc2nccnc2cc1	(E)-1-(2,5-dimethoxyphenyl)-3-(quinoxalin-6-yl)prop-2-en-1-one	Winter&Gozzi_2014	IC50	1.7 uM	1
147	O(C)c1cc(ccc1OC)C(=O)\C=C\c1cc2nccnc2cc1	(E)-1-(3,4-dimethoxyphenyl)-3-(quinoxalin-6-yl)prop-2-en-1-one	Winter&Gozzi_2014	IC50	1.9 uM	1
148	O(C)c1cc(OC)ccc1C(=O)\C=C\c1cc2nccnc2cc1	(E)-1-(2,4-dimethoxyphenyl)-3-(quinoxalin-6-yl)prop-2-en-1-one	Winter&Gozzi_2014	IC50	1.4 uM	1
149	O(C)c1c(OC)cc(cc1OC)C(=O)\C=C\c1cc2nccnc2cc1	(E)-3-(quinoxalin-6-yl)-1-(3,4,5-trimethoxyphenyl)prop-2-en-1-one	Winter&Gozzi_2014	IC50	2.2 uM	1
150	O(C)c1cc(OC)c(OC)cc1C(=O)\C=C\c1cc2nccnc2cc1	(E)-3-(quinoxalin-6-yl)-1-(2,4,5-trimethoxyphenyl)prop-2-en-1-one	Winter&Gozzi_2014	IC50	1.4 uM	1
151	O(C)c1cc(cc(OC)c1)C(=O)\C=C\c1cc2nccnc2cc1	(E)-1-(3,5-dimethoxyphenyl)-3-(quinoxalin-6-yl)prop-2-en-1-one	Winter&Gozzi_2014	IC50	2.1 uM	1
152	O(C)c1cc(ccc1)C(=O)\C=C\c1cc2nccnc2cc1	(E)-1-(3-methoxyphenyl)-3-(quinoxalin-6-yl)prop-2-en-1-one	Winter&Gozzi_2014	IC50	5.0 uM	1
153	O(C)c1ccc(cc1)C(=O)\C=C\c1cc2c(cc1)cccc2	(E)-1-(4-methoxyphenyl)-3-(naphthalen-2-yl)prop-2-en-1-one	Winter&Gozzi_2014	IC50	>50 uM	0
154	O(C)c1cc(ccc1OC)C(=O)\C=C\c1cc2c(cc1)cccc2	(E)-1-(3,4-dimethoxyphenyl)-3-(naphthalen-2-yl)prop-2-en-1-one	Winter&Gozzi_2014	IC50	4.1 uM	1
155	O(C)c1cc(ccc1O)C(=O)\C=C\c1cc2c(cc1)cccc2	(E)-1-(4-hydroxy-3-methoxyphenyl)-3-(naphthalen-2-yl)prop-2-en-1-one	Winter&Gozzi_2014	IC50	5.8 uM	1
156	O(C)c1cc(OC)c(OC)cc1C(=O)\C=C\c1cc2c(cc1)cccc2	(E)-3-(naphthalen-2-yl)-1-(2,4,5-trimethoxyphenyl)prop-2-en-1-one	Winter&Gozzi_2014	IC50	2.5 uM	1
157	O(C)c1cc(ccc1)C(=O)\C=C\c1cc2c(cc1)cccc2	(E)-1-(3-methoxyphenyl)-3-(naphthalen-2-yl)prop-2-en-1-one	Winter&Gozzi_2014	IC50	>50 uM	0
158	O1c2cc(ccc2OC1)\C=C\C(=O)c1cc(OC)ccc1OC	(E)-3-(benzo[d][1,3]dioxol-5-yl)-1-(2,5-dimethoxyphenyl)prop-2-en-1-one	Winter&Gozzi_2014	IC50	5.6 uM	1
159	O1c2cc(ccc2OC1)\C=C\C(=O)c1cc(OC)c(OC)cc1	(E)-3-(benzo[d][1,3]dioxol-5-yl)-1-(3,4-dimethoxyphenyl)prop-2-en-1-one	Winter&Gozzi_2014	IC50	3.5 uM	1
160	O1c2cc(ccc2OC1)\C=C\C(=O)c1cc(OC)c(OC)c(OC)c1	(E)-3-(benzo[d][1,3]dioxol-5-yl)-1-(3,4,5-trimethoxyphenyl)prop-2-en-1-one	Winter&Gozzi_2014	IC50	6.1 uM	1
161	O1c2cc(ccc2OC1)\C=C\C(=O)c1cc(OC)c(OC)cc1OC	(E)-3-(benzo[d][1,3]dioxol-5-yl)-1-(2,4,5-trimethoxyphenyl)prop-2-en-1-one	Winter&Gozzi_2014	IC50	0.94 uM	1
162	O(C)c1ccc(OC)cc1C(=O)\C=C\c1c2c(ccc1)cccc2	(E)-1-(2,5-dimethoxyphenyl)-3-(naphthalen-1-yl)prop-2-en-1-one	Winter&Gozzi_2014	IC50	3.5 uM	1
163	O1c2cc(ccc2OC1)C(=O)\C=C\c1cc(OC)c(OC)cc1OC	(E)-1-(benzo[d][1,3]dioxol-5-yl)-3-(2,4,5-trimethoxyphenyl)prop-2-en-1-one	Winter&Gozzi_2014	IC50	2.2 uM	1
164	O1c2cc(ccc2OC1)C(=O)\C=C\c1c(OC)cc(OC)cc1OC	(E)-1-(benzo[d][1,3]dioxol-5-yl)-3-(2,4,6-trimethoxyphenyl)prop-2-en-1-one	Winter&Gozzi_2014	IC50	3.8 uM	1
165	O1c2cc(ccc2OC1)C(=O)\C=C\c1cc2OCOc2cc1	(E)-1,3-bis(benzo[d][1,3]dioxol-5-yl)prop-2-en-1-one	Winter&Gozzi_2014	IC50	>50 uM	0
166	O1c2cc(ccc2OC1)C(=O)\C=C\c1c(OC)cccc1OC	(E)-1-(benzo[d][1,3]dioxol-5-yl)-3-(2,6-dimethoxyphenyl)prop-2-en-1-one	Winter&Gozzi_2014	IC50	1.5 uM	1
167	O1c2cc(ccc2OC1)C(=O)\C=C\c1ccccc1[N+](=O)[O-]	(E)-1-(benzo[d][1,3]dioxol-5-yl)-3-(2-nitrophenyl)prop-2-en-1-one	Winter&Gozzi_2014	IC50	>50 uM	0
168	O1c2cc(ccc2OC1)C(=O)\C=C\c1cc(OC)c(O)cc1	(E)-1-(benzo[d][1,3]dioxol-5-yl)-3-(4-hydroxy-3-methoxyphenyl)prop-2-en-1-one	Winter&Gozzi_2014	IC50	3.9 uM	1
169	O1c2cc(ccc2OC1)C(=O)\C=C\c1ccc(cc1)C#N	(E)-4-(3-(benzo[d][1,3]dioxol-5-yl)-3-oxoprop-1-en-1-yl)benzonitrile	Winter&Gozzi_2014	IC50	>50 uM	0
170	Clc1ccc(cc1-c1oc(cc1)\C=C\C(=O)c1cc2OCOc2cc1)C(F)(F)F	(E)-1-(benzo[d][1,3]dioxol-5-yl)-3-(5-(2-chloro-5-(trifluoromethyl)phenyl)furan-2-yl)prop-2-en-1-one	Winter&Gozzi_2014	IC50	>50 uM	0
171	O(C)c1cccc(OC)c1\C=C\C(=O)c1cc2c(cc1)cccc2	(E)-3-(2,6-dimethoxyphenyl)-1-(naphthalen-2-yl)prop-2-en-1-one	Winter&Gozzi_2014	IC50	7.6 uM	1
172	O(C)c1ccc(OC)cc1\C=C\C(=O)c1cc2c(cc1)cccc2	(E)-3-(2,5-dimethoxyphenyl)-1-(naphthalen-2-yl)prop-2-en-1-one	Winter&Gozzi_2014	IC50	5.5 uM	1
173	FC(F)(F)c1ccc(cc1)\C=C\C(=O)c1cc2c(cc1)cccc2	(E)-1-(naphthalen-2-yl)-3-(4-(trifluoromethyl)phenyl)prop-2-en-1-one	Winter&Gozzi_2014	IC50	>50 uM	0
174	O=C(\C=C\c1ccc(cc1)C#N)c1cc2c(cc1)cccc2	(E)-4-(3-(naphthalen-2-yl)-3-oxoprop-1-en-1-yl)benzonitrile	Winter&Gozzi_2014	IC50	>50 uM	0
175	Clc1cc(Cl)ccc1\C=C\C(=O)c1cc2c(cc1)cccc2	(E)-3-(2,4-dichlorophenyl)-1-(naphthalen-2-yl)prop-2-en-1-one	Winter&Gozzi_2014	IC50	>50 uM	0
176	O(C)c1c(OC)c(OC)ccc1\C=C\C(=O)c1cc2c(cc1)cccc2	(E)-1-(naphthalen-2-yl)-3-(2,3,4-trimethoxyphenyl)prop-2-en-1-one	Winter&Gozzi_2014	IC50	4.4 uM	1
177	O1c2c(C(=O)C=C1C(=O)NCCc1cc(OC)c(OC)cc1)c(O)ccc2	N-(3,4-dimethoxyphenethyl)-5-hydroxy-4-oxo-4H-chromene-2-carboxamide 103513537	Valdameri&Genoux-Bastide_2012 Boumendjel_2005	%inhibition at 5 uM reported by Montanari_2014	0.625 INHIBITOR	1
178	O1c2c(C(=O)C=C1C(=O)NCCc1cc(OC)c(OC)cc1)c(OCc1ccccc1)ccc2	5-(benzyloxy)-N-(3,4-dimethoxyphenethyl)-4-oxo-4H-chromene-2-carboxamide	Valdameri&Genoux-Bastide_2012	IC50	0.17 uM	1
179	O1c2c(C(=O)C=C1C(=O)N1CCN(CC1)c1ccccc1)c(OCc1ccccc1)ccc2	5-(benzyloxy)-2-(4-phenylpiperazine-1-carbonyl)-4H-chromen-4-one	Valdameri&Genoux-Bastide_2012	%inhibition at 5 uM	0.661	1
180	O1c2c(C(=O)C=C1C(=O)NCCc1cc(OC)c(OC)cc1)c(OCCc1cc(OC)c(OC)cc1)ccc2	5-(3,4-dimethoxyphenethoxy)-N-(3,4-dimethoxyphenethyl)-4-oxo-4H-chromene-2-carboxamide	Valdameri&Genoux-Bastide_2012	IC50	0.47 uM	1
181	O1c2c(C(=O)C=C1C(=O)NCCc1c3cc(OC)ccc3[nH]c1)c(OCc1ccccc1)ccc2	5-(benzyloxy)-N-(2-(5-methoxy-1H-indol-3-yl)ethyl)-4-oxo-4H-chromene-2-carboxamide	Valdameri&Genoux-Bastide_2012	IC50	0.18 uM	1
182	Brc1ccc(cc1)COc1c2c(OC(=CC2=O)C(=O)NCCc2c3cc(OC)ccc3[nH]c2)ccc1	5-((4-bromobenzyl)oxy)-N-(2-(5-methoxy-1H-indol-3-yl)ethyl)-4-oxo-4H-chromene-2-carboxamide 5-(4'-Bromobenzyloxy)-4-oxo-4H-chromene-2-carboxylic acid [2-(5-methoxy-1H-indol-3-yl)-ethyl]-amide CHEMBL2011288	Valdameri&Genoux-Bastide_2012 Pires_2016 winter_2013	IC50 EC50 (uM) EC50（uM）	0.11 uM 0.26 0.05	1
183	O1c2c(C(=O)C=C1C(=O)NCCc1c3cc(OC)ccc3[nH]c1)c(OCc1ccc(cc1)C)ccc2	N-(2-(5-methoxy-1H-indol-3-yl)ethyl)-5-((4-methylbenzyl)oxy)-4-oxo-4H-chromene-2-carboxamide	Valdameri&Genoux-Bastide_2012	IC50	0.20 uM	1
184	O1c2c(C(=O)C=C1C(=O)NCCc1c3cc(OC)ccc3[nH]c1)c(OCCc1ccccc1)ccc2	N-(2-(5-methoxy-1H-indol-3-yl)ethyl)-4-oxo-5-phenethoxy-4H-chromene-2-carboxamide	Valdameri&Genoux-Bastide_2012	IC50	0.16 uM	1
185	Oc1cc(O)ccc1C(=O)[O-]	2,4-Dihydroxybenzoic acid 1491	Tan_2013 Sjostedt_2017	mitoxantrone accumulation (%) transport value（%）	1.01 106	0
186	Oc1cc(ccc1O)C(=O)[O-]	3,4-Dihydroxybenzoic acid 72	Tan_2013 Sjostedt_2017	mitoxantrone accumulation (%) transport value（%）	1.065 95	0
187	Oc1cc(ccc1O)\C=C\C(=O)[O-]	Caffeic acid 689043	Tan_2013 Sjostedt_2017	mitoxantrone accumulation (%) transport value（%）	0.973 90	0
188	Oc1cc(ccc1O)\C=C\C(O[C@@H]1C[C@@](O)(C[C@@H](O)[C@H]1O)C(=O)[O-])=O	Chlorogenic acid	Tan_2013	mitoxantrone accumulation (%)	0.978	0
189	Oc1ccc(cc1)\C=C\C(=O)[O-]	p-Coumaric acid 637542	Tan_2013 Sjostedt_2017	mitoxantrone accumulation (%) transport value（%）	1.025 86	0
190	O(C)c1cc(ccc1O)\C=C\C(=O)[O-]	Ferulic acid 445858	Tan_2013 Sjostedt_2017	mitoxantrone accumulation (%) transport value（%）	1.035 87	0
191	Oc1c(O)cc(cc1O)C(=O)[O-]	Gallic acid	Tan_2013	mitoxantrone accumulation (%)	1.084	0
192	Oc1ccccc1C(=O)[O-]	Salicylic acid 338 Salicylic acid	Tan_2013 Sjostedt_2017 Matsson_2007	mitoxantrone accumulation (%) transport value（%） reported by Montanari_2014	1.178 92 INACTIVE	0
193	O(C)c1cc(cc(OC)c1O)C(=O)[O-]	Syringic acid 10742	Tan_2013 Sjostedt_2017	mitoxantrone accumulation (%) transport value（%）	0.989 98	0
194	O1c2c(C(=O)C=C1c1ccc(OC)cc1)c(O)cc(O)c2	acacetin Acacetin	Tan_2013 Imai_2004	mitoxantrone accumulation (%) reported by Montanari_2014	1.598 INHIBITOR	1
195	O1c2c(C(=O)C=C1c1ccc(O)cc1)c(O)cc(O)c2	Apigenin 5280443 Apigenin	Tan_2013 Sjostedt_2017 Imai_2004	mitoxantrone accumulation (%) transport value（%） reported by Montanari_2014	1.752 2 INHIBITOR	1
196	O1c2c(C[C@H](O)[C@H]1c1cc(O)c(O)cc1)c(O)cc(O)c2	(+)-catechin 9064 (+)-Catechin	Tan_2013 Sjostedt_2017 Imai_2004	mitoxantrone accumulation (%) transport value（%） reported by Montanari_2014	1.004 77 INACTIVE	0
197	O1c2c(C(=O)C=C1c1ccccc1)c(O)cc(O)c2	Chrysin 5281607 Chrysin	Tan_2013 Sjostedt_2017 Ahmed-Belkacem_2005	mitoxantrone accumulation (%) transport value（%） reported by Montanari_2014	1.869 13 INHIBITOR	1
198	O1c2c(C(=O)C=C1c1cc(OC)c(O)cc1)c(O)cc(O)c2	Chrysoeriol	Tan_2013	mitoxantrone accumulation (%)	2.074	1
199	O1c2c(C(=O)C=C1c1cc(O)c(OC)cc1)c(O)cc(O)c2	Diosmetin Diosmetin	Tan_2013 Imai_2004	mitoxantrone accumulation (%) reported by Montanari_2014	1.918 INHIBITOR	1
200	O1c2c(C(=O)C(O)=C1c1ccc(OC)cc1)c(O)cc(O)c2	Kaempferide Kaempferide	Tan_2013 Imai_2004	mitoxantrone accumulation (%) reported by Montanari_2014	1.433 INHIBITOR	1
201	O1c2c(C(=O)C(O)=C1c1ccc(O)cc1)c(O)cc(O)c2	Kaempferol 5280863 Kaempferol	Tan_2013 Sjostedt_2017 Imai_2004	mitoxantrone accumulation (%) transport value（%） reported by Montanari_2014	1.896 1 INHIBITOR	1
202	O1c2c(C(=O)C(O)=C1c1cc(OC)c(O)c(O)c1)c(O)cc(O)c2	Laricitrin	Tan_2013	mitoxantrone accumulation (%)	1.466	1
203	O1c2c(C(=O)C=C1c1cc(O)c(O)cc1)c(O)cc(O)c2	Luteolin 5280445	Tan_2013 Sjostedt_2017	mitoxantrone accumulation (%) transport value（%）	1.731 1	1
204	O1c2c(C(=O)C(O)=C1c1cc(OC)c(OC)c(OC)c1)c(O)cc(O)c2	Myricetin 3',4',5'-trimethyl ether	Tan_2013	mitoxantrone accumulation (%)	1.482	1
205	O1c2c(C(=O)CC1c1ccc(O)cc1)c(O)cc(O)c2	Naringenin 932	Tan_2013 Sjostedt_2017	mitoxantrone accumulation (%) transport value（%）	1.77 2	1
206	O1c2c(C(=O)C[C@H]1c1ccccc1)c(O)cc(O)c2	Pinocembrin	Tan_2013	mitoxantrone accumulation (%)	1.605	1
207	O1c2c(C(=O)C(O)=C1c1cc(O)c(O)cc1)c(O)cc(O)c2	Quercetin 5280343	Tan_2013 Sjostedt_2017	mitoxantrone accumulation (%) transport value（%）	1.488 5	1
208	O1c2c(C(=O)C(O[C@@H]3O[C@@H](C)[C@H](O)[C@@H](O)[C@H]3O)=C1c1cc(O)c(O)cc1)c(O)cc(O)c2	Quercitrin 5280459	Tan_2013 Sjostedt_2017	mitoxantrone accumulation (%) transport value（%）	1.352 2	1
209	O1c2c(c(OC)c(OC)c(OC)c2)C(=O)C=C1c1cc(OC)c(OC)cc1	Sinensetin Sinensetin	Tan_2013 Pick_2011	mitoxantrone accumulation (%) reported by Montanari_2014	1.817 INHIBITOR	1
210	O1c2c(C(=O)C(O)=C1c1cc(O)c(OC)cc1)c(O)cc(O)c2	Tamarixetin	Tan_2013	mitoxantrone accumulation (%)	1.812	1
211	O1c2c(c(OC)c(OC)c(OC)c2OC)C(=O)C=C1c1ccc(OC)cc1	Tangeretin tangeretin	Tan_2013 Fleisher_2015	mitoxantrone accumulation (%) IC50 (uM)	1.481 1.19	1
212	O1c2c(C(=O)C=C1c1cc(OC)c(OC)c(OC)c1)c(O)cc(O)c2	Tricetin 3',4',5'-trimethylether	Tan_2013	mitoxantrone accumulation (%)	1.475	1
213	O1c2c(OC1)cc-1c(CC[n+]3c-1cc1c(c3)c(OC)c(OC)cc1)c2	Berberine	Tan_2013	mitoxantrone accumulation (%)	1.643	1
214	OC=1C(=O)C=C2C(=CC=C3[C@]4(CC[C@@]5([C@@H](C[C@@](CC5)(C(=O)[O-])C)[C@@]4(CC[C@@]23C)C)C)C)C=1C	Celastrol	Tan_2013	mitoxantrone accumulation (%)	1.371	1
215	O1c2c(C=CC1=O)cccc2	Coumarin 323	Tan_2013 Sjostedt_2017	mitoxantrone accumulation (%) transport value（%）	1.147 111	0
216	OCc1c2c([nH]c1)cccc2	Indole 3-carbinol	Tan_2013	mitoxantrone accumulation (%)	1.03	0
217	O1[C@H]([C@]2([C@@]3(O[C@@H]3C1=O)[C@]1([C@@H]([C@]34[C@@H](CC1=O)C(O[C@H]3CC(OC4)=O)(C)C)CC2)C)C)c1ccoc1	Limonin	Tan_2013	mitoxantrone accumulation (%)	1.381	1
218	OC(CC(=O)[O-])C(=O)[O-]	Malic acid	Tan_2013	mitoxantrone accumulation (%)	0.992	0
219	O[C@H]1CC[C@]2([C@@H](CC[C@@]3([C@@H]2CC=C2[C@@H]4CC(CC[C@@]4(CC[C@]23C)C(=O)[O-])(C)C)C)C1(C)C)C	Oleanolic acid	Tan_2013	mitoxantrone accumulation (%)	1.536	1
220	Oc1cc(O)cc(O)c1	Phloroglucinol	Tan_2013	mitoxantrone accumulation (%)	1.121	0
221	Oc1c(O)cc(cc1O)C(OCCC)=O	Propyl gallate	Tan_2013	mitoxantrone accumulation (%)	1.172	1
222	OC1[C@H](O)CC(O)(C[C@H]1O)C(=O)[O-]	Quinic acid 6508	Tan_2013 Sjostedt_2017	mitoxantrone accumulation (%) transport value（%）	1.099 111	0
223	O[C@H]1CC[C@]2([C@@H](CC[C@@]3([C@@H]2CC=C2[C@@H]4[C@@H](C)[C@@H](CC[C@@]4(CC[C@]23C)C(=O)[O-])C)C)C1(C)C)C	Ursolic acid	Tan_2013	mitoxantrone accumulation (%)	1.365	1
224	O(C)c1cc(ccc1O)C=O	Vanillin 1183	Tan_2013 Sjostedt_2017	mitoxantrone accumulation (%) transport value（%）	0.957 118	0
225	OC(C=C)C#CC#CC\C=C\CCCCCCC	Falcarinol	Tan_2014	mitoxantrone accumulation (%)	120%-130%	1
226	O[C@H](C=C)C#CC#C[C@@H](O)\C=C/CCCCCCC	Falcarindiol	Tan_2014	mitoxantrone accumulation (%)	1.5	1
227	O(C(C=C)C#CC#CC(O)\C=C\CCCCCCC)C(=O)C	Falcarindiol 3-acetate	Tan_2014	mitoxantrone accumulation (%)	120%-130%	1
228	O(C(C=C)C#CC#CC(OC(=O)C)\C=C\CCCCCCC)C(=O)C	Falcarindiol 3,8-diacetate	Tan_2014	mitoxantrone accumulation (%)	120%-130%	1
229	O(C)c1ccccc1C(=O)\C=C\c1ccccc1	(E)-1-(2-methoxyphenyl)-3-phenylprop-2-en-1-one	Han_2008	mitoxantrone accumulation (%)	2.046	0
230	Clc1ccccc1\C=C\C(=O)c1ccccc1OC	(E)-3-(2-chlorophenyl)-1-(2-methoxyphenyl)prop-2-en-1-one	Han_2008	mitoxantrone accumulation (%)	3.327	1
231	Clc1ccc(cc1)\C=C\C(=O)c1ccccc1OC	(E)-3-(4-chlorophenyl)-1-(2-methoxyphenyl)prop-2-en-1-one	Han_2008	mitoxantrone accumulation (%)	2.113	0
232	O(C)c1cc(OC)ccc1C(=O)\C=C\c1ccccc1	(E)-1-(2,4-dimethoxyphenyl)-3-phenylprop-2-en-1-one	Han_2008	mitoxantrone accumulation (%)	2.954	1
233	Clc1ccccc1\C=C\C(=O)c1ccc(OC)cc1OC	(E)-3-(2-chlorophenyl)-1-(2,4-dimethoxyphenyl)prop-2-en-1-one 103543854	Han_2008 Juvale_2012	mitoxantrone accumulation (%) reported by Montanari_2014	3.153 INHIBITOR	1
234	Clc1cc(ccc1)\C=C\C(=O)c1ccc(OC)cc1OC	(E)-3-(3-chlorophenyl)-1-(2,4-dimethoxyphenyl)prop-2-en-1-one	Han_2008	mitoxantrone accumulation (%)	3.239	1
235	Clc1ccc(cc1)\C=C\C(=O)c1ccc(OC)cc1OC	(E)-3-(4-chlorophenyl)-1-(2,4-dimethoxyphenyl)prop-2-en-1-one 103377670	Han_2008 Juvale_2012	mitoxantrone accumulation (%) reported by Montanari_2014	3.704 INHIBITOR	1
236	Clc1cc(ccc1Cl)\C=C\C(=O)c1ccc(OC)cc1OC	(E)-3-(3,4-dichlorophenyl)-1-(2,4-dimethoxyphenyl)prop-2-en-1-one	Han_2008	mitoxantrone accumulation (%)	3.155	1
237	O(C)c1c(OC)c(OC)ccc1C(=O)\C=C\c1ccccc1	(E)-3-phenyl-1-(2,3,4-trimethoxyphenyl)prop-2-en-1-one	Han_2008	mitoxantrone accumulation (%)	2.312	0
238	Clc1ccccc1\C=C\C(=O)c1ccc(OC)c(OC)c1OC	(E)-3-(2-chlorophenyl)-1-(2,3,4-trimethoxyphenyl)prop-2-en-1-one	Han_2008	mitoxantrone accumulation (%)	2.657	1
239	Clc1ccc(cc1)\C=C\C(=O)c1ccc(OC)c(OC)c1OC	(E)-3-(4-chlorophenyl)-1-(2,3,4-trimethoxyphenyl)prop-2-en-1-one	Han_2008	mitoxantrone accumulation (%)	2.542	0
240	Clc1cc(ccc1Cl)\C=C\C(=O)c1ccc(OC)c(OC)c1OC	(E)-3-(3,4-dichlorophenyl)-1-(2,3,4-trimethoxyphenyl)prop-2-en-1-one	Han_2008	mitoxantrone accumulation (%)	2.86	1
241	Oc1ccccc1C(=O)\C=C\c1ccccc1	(E)-1-(2-hydroxyphenyl)-3-phenylprop-2-en-1-one 103206494	Han_2008 Juvale_2012	mitoxantrone accumulation (%) reported by Montanari_2014	1.845 INACTIVE	0
242	Clc1ccccc1\C=C\C(=O)c1ccccc1O	(E)-3-(2-chlorophenyl)-1-(2-hydroxyphenyl)prop-2-en-1-one	Han_2008	mitoxantrone accumulation (%)	2.704	1
243	Clc1ccccc1\C=C\C(=O)c1ccc(O)cc1O	(E)-3-(2-chlorophenyl)-1-(2,4-dihydroxyphenyl)prop-2-en-1-one 136939282	Han_2008 Juvale_2012	mitoxantrone accumulation (%) reported by Montanari_2014	3.441 INHIBITOR	1
244	Clc1cc(ccc1)\C=C\C(=O)c1ccc(O)cc1O	(E)-3-(3-chlorophenyl)-1-(2,4-dihydroxyphenyl)prop-2-en-1-one	Han_2008	mitoxantrone accumulation (%)	3.59	1
245	Clc1ccc(cc1)\C=C\C(=O)c1ccc(O)cc1O	(E)-3-(4-chlorophenyl)-1-(2,4-dihydroxyphenyl)prop-2-en-1-one 103377226	Han_2008 Juvale_2012	mitoxantrone accumulation (%) reported by Montanari_2014	3.544 INHIBITOR	1
246	O=C(Nc1ccc(cc1)CCC)c1ccccc1NC(=O)Nc1ccc([N+](=O)[O-])cc1	2-(3-(4-Nitrophenyl)ureido)-N-(4-propylphenyl)benzamide	Gujarati_2017	Fold Resistance (10 uM)	1.51	1
247	O=C(Nc1ccc(cc1)CCC)c1ccccc1NC(=O)Nc1cc([N+](=O)[O-])ccc1	2-(3-(3-Nitrophenyl)ureido)-N-(4-propylphenyl)benzamide	Gujarati_2017	Fold Resistance (10 uM)	1.62	1
248	O(C)c1cc(-n2nc(nn2)-c2ccccc2NC(=O)c2ccc(N)cc2)ccc1	N-(2-(2-(3-methoxyphenyl)-2H-tetrazol-5-yl)phenyl)-4-aminobenzamide	Gujarati_2017	Fold Resistance (10 uM)	1.39	1
249	BrCC(=O)Nc1ccc(cc1)C(=O)Nc1ccccc1-c1nn(nn1)-c1cc(OC)ccc1	4-(2-Bromoacetamido)-N-(2-(2-(3-methoxyphenyl)-2H-tetrazol-5-yl)phenyl)benzamide	Gujarati_2017	Fold Resistance (10 uM)	1.32	1
250	O(C)c1cc(-n2nc(nn2)-c2ccccc2NC(=O)Nc2ccc([N+](=O)[O-])cc2)ccc1	1-(2-(2-(3-Methoxyphenyl)-2H-tetrazol-5-yl)phenyl)-3-(4-nitrophenyl)urea	Gujarati_2017	Fold Resistance (10 uM)	1.87	1
251	O(C)c1cc(-n2nc(nn2)-c2ccccc2NC(=O)Nc2ccc(N)cc2)ccc1	1-(4-Aminophenyl)-3-(2-(2-(3-methoxyphenyl)-2H-tetrazol-5-yl)phenyl)urea	Gujarati_2017	Fold Resistance (10 uM)	1.76	1
252	O(C)c1cc(-n2nc(nn2)-c2ccccc2NC(=O)Nc2ccc(NC(=O)C)cc2)ccc1	N-(4-(3-(2-(2-(3-methoxyphenyl)-2H-tetrazol-5-yl)phenyl)ureido)phenyl)acetamide	Gujarati_2017	Fold Resistance (10 uM)	1.51	1
253	Oc1cc(Nc2nc(nc3c2cccc3)-c2ccccc2)ccc1	3-((2-Phenylquinazolin-4-yl)amino)phenol	Juvale_2013_2	IC50	0.15 uM	1
254	O(C)c1cc(ccc1OC)-c1nc(Nc2ccccc2)c2c(n1)cccc2	2-(3,4-Dimethoxyphenyl)-N-phenylquinazolin-4-amine	Juvale_2013_2	IC50	1.99 uM	1
255	Brc1cc(Nc2nc(nc3c2cccc3)-c2cc(OC)c(OC)cc2)ccc1	N-(3-Bromophenyl)-2-(3,4-dimethoxyphenyl)quinazolin-4-amine	Juvale_2013_2	IC50	0.29 uM	1
256	O(C)c1cc(ccc1OC)-c1nc(Nc2cc(OC)c(OC)cc2)c2c(n1)cccc2	N,2-Bis(3,4-dimethoxyphenyl)quinazolin-4-amine	Juvale_2013_2	IC50	0.42 uM	1
257	O(C)c1cc(ccc1OC)-c1nc(Nc2ccccc2[N+](=O)[O-])c2c(n1)cccc2	2-(3,4-Dimethoxyphenyl)-N-(2-nitrophenyl)quinazolin-4-amine	Juvale_2013_2	IC50	0.64 uM	1
258	O(C)c1cc(ccc1OC)-c1nc(Nc2cc([N+](=O)[O-])ccc2)c2c(n1)cccc2	2-(3,4-Dimethoxyphenyl)-N-(3-nitrophenyl)quinazolin-4-amine 2-(3,4-dimethoxyphenyl)-N-(3-nitrophenyl)quinazolin-4-amine	Juvale_2013_2 Krapf_2017_2	IC50 IC50	0.076 uM 0.0825	1
259	O(C)c1cc(ccc1OC)-c1nc(Nc2ccc([N+](=O)[O-])cc2)c2c(n1)cccc2	2-(3,4-Dimethoxyphenyl)-N-(4-nitrophenyl)quinazolin-4-amine 2-(3,4-dimethoxyphenyl)-N-(4-nitrophenyl)quinazolin-4-amine	Juvale_2013_2 Krapf_2017_2	IC50 IC50	0.30 uM 0.0442	1
260	FC(F)(F)c1cc(Nc2nc(nc3c2cccc3)-c2cc(OC)c(OC)cc2)ccc1	2-(3,4-Dimethoxyphenyl)-N-(3-(trifluoromethyl)phenyl)-quinazolin-4-amine	Juvale_2013_2	IC50	0.30 uM	1
261	O(C)c1cc(ccc1OC)-c1nc(Nc2cc(ccc2)C#N)c2c(n1)cccc2	3-((2-(3,4-Dimethoxyphenyl)quinazolin-4-yl)amino)-benzonitrile 3-((2-(3,4-dimethoxyphenyl)quinazolin-4-yl)amino)benzo-nitrile	Juvale_2013_2 Krapf_2017_2	IC50 IC50	0.19 uM 0.136	1
262	O(C)c1cc(ccc1OC)-c1nc(Nc2ccccc2O)c2c(n1)cccc2	2-((2-(3,4-Dimethoxyphenyl)quinazolin-4-yl)amino)-phenol	Juvale_2013_2	IC50	0.26 uM	1
263	O(C)c1cc(ccc1OC)-c1nc(Nc2cc(O)ccc2)c2c(n1)cccc2	3-((2-(3,4-Dimethoxyphenyl)quinazolin-4-yl)amino)-phenol	Juvale_2013_2	IC50	0.14 uM	1
264	O(C)c1cc(ccc1OC)-c1nc(Nc2ccc(O)cc2)c2c(n1)cccc2	4-((2-(3,4-Dimethoxyphenyl)quinazolin-4-yl)amino)-phenol	Juvale_2013_2	IC50	0.47 uM	1
265	Brc1cc(Nc2ncnc3c2cccc3)ccc1	N-(3-Bromophenyl)quinazolin-4-amine	Juvale_2013_2	IC50	1.08 uM	1
266	n1cnc2c(cccc2)c1Nc1cc(ccc1)C#N	3-(Quinazolin-4-ylamino)benzonitrile	Juvale_2013_2	IC50	1.18 uM	1
267	O=[N+]([O-])c1cc(Nc2ncnc3c2cccc3)ccc1	N-(3-Nitrophenyl)quinazolin-4-amine	Juvale_2013_2	IC50	1.13 uM	1
268	FC(F)(F)c1cc(Nc2ncnc3c2cccc3)ccc1	N-(3-(Trifluoromethyl)phenyl)quinazolin-4-amine	Juvale_2013_2	IC50	0.94 uM	1
269	O(C)c1cc(Nc2ncnc3c2cccc3)ccc1OC	N-(3,4-Dimethoxyphenyl)quinazolin-4-amine	Juvale_2013_2	IC50	4.79 uM	1
270	Brc1cc(Nc2ncnc3c2cc(OC)c(OC)c3)ccc1	N-(3-Bromophenyl)-6,7-dimethoxyquinazolin-4-amine	Juvale_2013_2	IC50	1.73 uM	1
271	FC(F)(F)c1cc(Nc2ncnc3c2cc(OC)c(OC)c3)ccc1	6,7-Dimethoxy-N-(3-(trifluoromethyl)phenyl)quinazolin-4-amine	Juvale_2013_2	IC50	2.40 uM	1
272	O(C)c1cc2c(ncnc2Nc2cc(ccc2)C#N)cc1OC	3-((6,7-Dimethoxyquinazolin-4-yl)amino)benzonitrile	Juvale_2013_2	IC50	1.06 uM	1
273	O(C)c1cc2c(ncnc2Nc2ccccc2[N+](=O)[O-])cc1OC	6,7-Dimethoxy-N-(2-nitrophenyl)quinazolin-4-amine	Juvale_2013_2	IC50	3.80 uM	1
274	O(C)c1cc2c(ncnc2Nc2cc([N+](=O)[O-])ccc2)cc1OC	6,7-Dimethoxy-N-(3-nitrophenyl)quinazolin-4-amine	Juvale_2013_2	IC50	0.81 uM	1
275	O(C)c1cc2c(ncnc2Nc2ccc([N+](=O)[O-])cc2)cc1OC	6,7-Dimethoxy-N-(4-nitrophenyl)quinazolin-4-amine	Juvale_2013_2	IC50	0.92 uM	1
276	O(C)c1cc(Nc2ncnc3c2cc(OC)c(OC)c3)ccc1OC	N-(3,4-Dimethoxyphenyl)-6,7-dimethoxyquinazolin-4-amine	Juvale_2013_2	IC50	7.38 uM	1
277	Brc1cc(Nc2nc(nc3c2cc(OC)c(OC)c3)Nc2cc(Br)ccc2)ccc1	N2,N4-Bis(3-bromophenyl)-6,7-dimethoxyquinazoline-2,4-diamine	Juvale_2013_2	IC50	0.67 uM	1
278	FC(F)(F)c1cc(Nc2nc(nc3c2cc(OC)c(OC)c3)Nc2cc(ccc2)C(F)(F)F)ccc1	6,7-Dimethoxy-N2,N4-bis(3-(trifluoromethyl)phenyl)-quinazoline-2,4-diamine	Juvale_2013_2	IC50	0.80 uM	1
279	O(C)c1cc2c(nc(nc2Nc2cc(ccc2)C#N)Nc2cc(ccc2)C#N)cc1OC	3,3'-((6,7-Dimethoxyquinazoline-2,4-diyl)bis(azanediyl))-dibenzonitrile	Juvale_2013_2	IC50	0.48 uM	1
280	O(C)c1cc2c(nc(nc2Nc2cc([N+](=O)[O-])ccc2)Nc2cc([N+](=O)[O-])ccc2)cc1OC	6,7-Dimethoxy-N2,N4-bis(3-nitrophenyl)quinazoline-2,4-diamine	Juvale_2013_2	IC50	0.33 uM	1
281	O(C)c1cc(Nc2nc(nc3c2cc(OC)c(OC)c3)Nc2cc(OC)c(OC)cc2)ccc1OC	N2,N4-Bis(3,4-dimethoxyphenyl)-6,7-dimethoxyquinazoline-2,4-diamine	Juvale_2013_2	IC50	1.74 uM	1
282	O(CCc1ccc(NC(=O)c2ccccc2NC(=O)c2ccc([N+](=O)[O-])cc2)cc1)C	N-(4-(2-Methoxyethyl)phenyl)-2-(4-nitrobenzamido)benzamide	Marighetti_2015	IC50	1.23 uM	1
283	O(C(=O)C)CCc1ccc(NC(=O)c2ccccc2NC(=O)c2ccc([N+](=O)[O-])cc2)cc1	4-(2-(4-Nitrobenzamido)benzamido)phenethyl acetate	Marighetti_2015	IC50	1.32 uM	1
284	O(C)c1ccc(NC(=O)c2ccccc2NC(=O)c2ccc([N+](=O)[O-])cc2)cc1	N-(4-Methoxyphenyl)-2-(4-nitrobenzamido)benzamide	Marighetti_2015	IC50	3.56 uM	1
285	Oc1ccc(NC(=O)c2ccccc2NC(=O)c2ccc([N+](=O)[O-])cc2)cc1	N-(4-Hydroxyphenyl)-2-(4-nitrobenzamido)benzamide	Marighetti_2015	IC50	1.76 uM	1
286	O=C(Nc1ccc(cc1)CCC)c1ccccc1NC(=O)c1ccc([N+](=O)[O-])cc1	2-(4-Nitrobenzamido)-N-(4-propylphenyl)benzamide	Marighetti_2015	IC50	0.94 uM	1
287	Brc1ccc(NC(=O)c2ccccc2NC(=O)c2ccc([N+](=O)[O-])cc2)cc1	N-(4-Bromophenyl)-2-(4-nitrobenzamido)benzamide	Marighetti_2015	IC50	ne	0
288	O=C(Nc1ccc(cc1)C(=O)N)c1ccccc1NC(=O)c1ccc([N+](=O)[O-])cc1	N-(4-Carbamoylphenyl)-2-(4-nitrobenzamido)benzamide	Marighetti_2015	IC50	ne	0
289	S(=O)(=O)(N)c1ccc(NC(=O)c2ccccc2NC(=O)c2ccc([N+](=O)[O-])cc2)cc1	2-(4-Nitrobenzamido)-N-(4-sulfamoylphenyl)benzamide	Marighetti_2015	IC50	ne	0
290	O=C(c1ccc(NC(=O)c2ccccc2NC(=O)c2ccc([N+](=O)[O-])cc2)cc1)c1ccccc1	N-(4-Benzoylphenyl)-2-(4-nitrobenzamido)benzamide	Marighetti_2015	IC50	1.63 uM	1
291	O=C(Nc1ccc(N(C)C)cc1)c1ccccc1NC(=O)c1ccc([N+](=O)[O-])cc1	N-(4-(Dimethylamino)phenyl)-2-(4-nitrobenzamido)benzamide	Marighetti_2015	IC50	ne	0
292	O(C)c1cc(ccc1OC)C(=O)Nc1ccccc1C(=O)Nc1ccc(OC)cc1	3,4-Dimethoxy-N-(2-(4-methoxyphenylcarbamoyl)-phenyl)benzamide	Marighetti_2015	IC50	3.34 uM	1
293	O(C)c1cc(ccc1OC)C(=O)Nc1ccccc1C(=O)Nc1ccc(O)cc1	N-(2-(4-Hydroxyphenylcarbamoyl)phenyl)-3,4-dimethoxybenzamide	Marighetti_2015	IC50	1.16 uM	1
294	Clc1ccc(NC(=O)c2ccccc2NC(=O)c2cc(OC)c(OC)cc2)cc1	N-(2-(4-Chlorophenylcarbamoyl)phenyl)-3,4-dimethoxybenzamide	Marighetti_2015	IC50	8.29 uM	1
295	O(C)c1cc(ccc1OC)C(=O)Nc1ccccc1C(=O)Nc1ccccc1	3,4-Dimethoxy-N-(2-(phenylcarbamoyl)phenyl)benzamide	Marighetti_2015	IC50	1.76 uM	1
296	O=C(Nc1ccccc1)c1ccccc1NC(=O)c1ccc(NC(=O)C)cc1	2-(4-Acetamidobenzamido)-N-phenylbenzamide	Marighetti_2015	IC50	2.09 uM	1
297	Clc1ccc(cc1)C(=O)Nc1ccccc1C(=O)Nc1ccc(OC)cc1	2-(4-Chlorobenzamido)-N-(4-methoxyphenyl)benzamide	Marighetti_2015	IC50	ne	0
298	Clc1ccc(cc1)C(=O)Nc1ccccc1C(=O)Nc1ccc(O)cc1	2-(4-Chlorobenzamido)-N-(4-hydroxyphenyl)benzamide	Marighetti_2015	IC50	2.91 uM	1
299	Clc1ccc(cc1)C(=O)Nc1ccccc1C(=O)Nc1ccc(cc1)C	2-(4-Chlorobenzamido)-N-p-tolylbenzamide	Marighetti_2015	IC50	ne	0
300	O=C(Nc1ccc(cc1)C)c1ccccc1NC(=O)c1ccc(cc1)C	2-(4-Methylbenzamido)-N-p-tolylbenzamide	Marighetti_2015	IC50	ne	0
301	O=C(c1ccc(NC(=O)c2ccccc2NC(=O)c2ccc(cc2)C)cc1)c1ccccc1	N-(4-Benzoylphenyl)-2-(4-methylbenzamido)benzamide	Marighetti_2015	IC50	0.56 uM	1
302	FC(F)(F)c1ccc(cc1)C(=O)Nc1ccccc1C(=O)Nc1ccc(cc1)CCOC	N-(4-(2-Methoxyethyl)phenyl)-2-(4-(trifluoromethyl)benzamido)-benzamide	Marighetti_2015	IC50	5.11 uM	1
303	FC(F)(F)c1ccc(cc1)C(=O)Nc1ccccc1C(=O)Nc1ccc(O)cc1	N-(4-Hydroxyphenyl)-2-(4-(trifluoromethyl)benzamido)benzamide	Marighetti_2015	IC50	1.80 uM	1
304	Clc1ccc(NC(=O)c2ccccc2NC(=O)c2ccc(cc2)C(F)(F)F)cc1	N-(4-Chlorophenyl)-2-(4-(trifluoromethyl)benzamido)benzamide	Marighetti_2015	IC50	ne	0
305	FC(F)(F)c1ccc(cc1)C(=O)Nc1ccccc1C(=O)Nc1ccccc1	N-Phenyl-2-(4-(trifluoromethyl)benzamido)benzamide	Marighetti_2015	IC50	ne	0
306	OC1CCC(NC(=O)c2ccccc2NC(=O)c2ccc([N+](=O)[O-])cc2)CC1	N-(4-Hydroxycyclohexyl)-2-(4-nitrobenzamido)benzamide	Marighetti_2015	IC50	6.11 uM	1
307	FC(F)(F)c1ccc(cc1)C(=O)Nc1ccccc1C(=O)NC1CCC(O)CC1	N-(4-Hydroxycyclohexyl)-2-(4-(trifluoromethyl)benzamido)benzamide	Marighetti_2015	IC50	3.35 uM	1
308	O=C(NCC)c1ccccc1NC(=O)c1ccc([N+](=O)[O-])cc1	N-Ethyl-2-(4-nitrobenzamido)benzamide	Marighetti_2015	IC50	ne	0
309	n1c(nc2ncccc2c1Nc1ccccc1)-c1ccccc1	N,2-Diphenylpyrido[2,3-d]pyrimidin-4-amine	Krapf_2018	IC50	0.149 uM	1
310	O=[N+]([O-])c1cc(Nc2nc(nc3ncccc23)-c2ccccc2)ccc1	N-(3-Nitrophenyl)-2-phenylpyrido[2,3-d]pyrimidin-4-amine	Krapf_2018	IC50	0.519 uM	1
311	Oc1ccc(Nc2nc(nc3ncccc23)-c2ccccc2)cc1[N+](=O)[O-]	2-Nitro-4-((2-phenylpyrido[2,3-d]pyrimidin-4-yl)amino)-phenol	Krapf_2018	IC50	0.528 uM	1
312	n1c(nc2ncccc2c1Nc1cc(ccc1)C#N)-c1ccccc1	3-((2-Phenylpyrido[2,3-d]pyrimidin-4-yl)amino)benzonitrile	Krapf_2018	IC50	0.400 uM	1
313	n1c(nc2ncccc2c1Nc1ccc(cc1)C#N)-c1ccccc1	4-((2-Phenylpyrido[2,3-d]pyrimidin-4-yl)amino)benzonitrile	Krapf_2018	IC50	1.210 uM	1
314	O(C)c1cc(Nc2nc(nc3ncccc23)-c2ccccc2)ccc1	N-(3-Methoxyphenyl)-2-phenylpyrido[2,3-d]pyrimidin-4-amine	Krapf_2018	IC50	0.150 uM	1
315	O(C)c1ccc(Nc2nc(nc3ncccc23)-c2ccccc2)cc1	N-(4-Methoxyphenyl)-2-phenylpyrido[2,3-d]pyrimidin-4-amine	Krapf_2018	IC50	0.238 uM	1
316	O(C)c1cc(Nc2nc(nc3ncccc23)-c2ccccc2)ccc1OC	N-(3,4-Dimethoxyphenyl)-2-phenylpyrido[2,3-d]pyrimidin-4-amine	Krapf_2018	IC50	0.343 uM	1
317	S(C)c1cc(Nc2nc(nc3ncccc23)-c2ccccc2)ccc1	N-(3-(Methylthio)phenyl)-2-phenylpyrido[2,3-d]pyrimidin-4-amine	Krapf_2018	IC50	0.206 uM	1
318	Oc1cc(Nc2nc(nc3ncccc23)-c2ccccc2)ccc1	3-((2-Phenylpyrido[2,3-d]pyrimidin-4-yl)amino)phenol	Krapf_2018	IC50	1.230 uM	1
319	Oc1ccc(Nc2nc(nc3ncccc23)-c2ccccc2)cc1	4-((2-Phenylpyrido[2,3-d]pyrimidin-4-yl)amino)phenol	Krapf_2018	IC50	2.040 uM	1
320	O=C(Nc1cc(Nc2nc(nc3ncccc23)-c2ccccc2)ccc1)C	N-(3-((2-Phenylpyrido[2,3-d]pyrimidin-4-yl)amino)phenyl)-acetamide	Krapf_2018	IC50	5.270 uM	1
321	FC(F)(F)c1cc(Nc2nc(nc3ncccc23)-c2ccccc2)ccc1	2-Phenyl-N-(3-(trifluoromethyl)phenyl)pyrido[2,3-d]-pyrimidin-4-amine	Krapf_2018	IC50	0.177 uM	1
322	Fc1cc(Nc2nc(nc3ncccc23)-c2ccccc2)ccc1	N-(3-Fluorophenyl)-2-phenylpyrido[2,3-d]pyrimidin-4-amine	Krapf_2018	IC50	0.164 uM	1
323	Clc1cc(Nc2nc(nc3ncccc23)-c2ccccc2)ccc1	N-(3-Chlorophenyl)-2-phenylpyrido[2,3-d]pyrimidin-4-amine	Krapf_2018	IC50	0.454 uM	1
324	O(C)c1cc(ccc1)-c1nc(Nc2cc([N+](=O)[O-])ccc2)c2cccnc2n1	2-(3-Methoxyphenyl)-N-(3-nitrophenyl)pyrido[2,3-d]-pyrimidin-4-amine	Krapf_2018	IC50	0.747 uM	1
325	O(C)c1cc(ccc1)-c1nc(Nc2cc([N+](=O)[O-])c(O)cc2)c2cccnc2n1	4-((2-(3-Methoxyphenyl)pyrido[2,3-d]pyrimidin-4-yl)-amino)-2-nitrophenol	Krapf_2018	IC50	1.260 uM	1
326	O(C)c1cc(ccc1)-c1nc(Nc2cc(ccc2)C#N)c2cccnc2n1	3-((2-(3-Methoxyphenyl)pyrido[2,3-d]pyrimidin-4-yl)amino)-benzonitrile	Krapf_2018	IC50	0.348 uM	1
327	O(C)c1cc(ccc1)-c1nc(Nc2ccc(cc2)C#N)c2cccnc2n1	4-((2-(3-Methoxyphenyl)pyrido[2,3-d]pyrimidin-4-yl)amino)-benzonitrile	Krapf_2018	IC50	0.876 uM	1
328	O(C)c1cc(ccc1)-c1nc(Nc2cc(O)ccc2)c2cccnc2n1	3-((2-(3-Methoxyphenyl)pyrido[2,3-d]pyrimidin-4-yl)amino)-phenol	Krapf_2018	IC50	0.963 uM	1
329	O(C)c1cc(ccc1)-c1nc(Nc2ccc(O)cc2)c2cccnc2n1	4-((2-(3-Methoxyphenyl)pyrido[2,3-d]pyrimidin-4-yl)amino)-phenol	Krapf_2018	IC50	1.300 uM	1
330	O(C)c1cc(Nc2nc(nc3ncccc23)-c2cc(OC)ccc2)ccc1OC	N-(3,4-Dimethoxyphenyl)-2-(3-methoxyphenyl)pyrido[2,3-d]pyrimidin-4-amine	Krapf_2018	IC50	0.572 uM	1
331	S(C)c1cc(Nc2nc(nc3ncccc23)-c2cc(OC)ccc2)ccc1	2-(3-Methoxyphenyl)-N-(3-(methylthio)phenyl)pyrido[2,3-d]pyrimidin-4-amine	Krapf_2018	IC50	0.910 uM	1
332	O(C)c1cc(ccc1)-c1nc(Nc2cc(NC(=O)C)ccc2)c2cccnc2n1	N-(3-((2-(3-Methoxyphenyl)pyrido[2,3-d]pyrimidin-4-yl)-amino)phenyl)acetamide	Krapf_2018	IC50	6.400 uM	1
333	FC(F)(F)c1cc(Nc2nc(nc3ncccc23)-c2cc(OC)ccc2)ccc1	2-(3-methoxyphenyl)-N-(3-(trifluoromethyl)phenyl)pyrido[2,3-d]pyrimidin-4-amine	Krapf_2018	IC50	0.264 uM	1
334	FC(F)(F)c1ccc(Nc2nc(nc3ncccc23)-c2cc(OC)ccc2)cc1	2-(3-methoxyphenyl)-N-(4-(trifluoromethyl)phenyl)pyrido[2,3-d]pyrimidin-4-amine	Krapf_2018	IC50	0.425 uM	1
335	Fc1cc(Nc2nc(nc3ncccc23)-c2cc(OC)ccc2)ccc1	N-(3-fluorophenyl)-2-(3-methoxyphenyl)pyrido[2,3-d]pyrimidin-4-amine	Krapf_2018	IC50	0.163 uM	1
336	Fc1ccc(Nc2nc(nc3ncccc23)-c2cc(OC)ccc2)cc1	N-(4-fluorophenyl)-2-(3-methoxyphenyl)pyrido[2,3-d]pyrimidin-4-amine	Krapf_2018	IC50	0.539 uM	1
337	Fc1cc(Nc2nc(nc3ncccc23)-c2cc(OC)ccc2)ccc1F	N-(3,4-difluorophenyl)-2-(3-methoxyphenyl)pyrido[2,3-d]pyrimidin-4-amine	Krapf_2018	IC50	0.621 uM	1
338	Clc1cc(Nc2nc(nc3ncccc23)-c2cc(OC)ccc2)ccc1	N-(3-Chlorophenyl)-2-(3-methoxyphenyl)pyrido[2,3-d]-pyrimidin-4-amine	Krapf_2018	IC50	0.628 uM	1
339	Brc1cc(Nc2nc(nc3ncccc23)-c2cc(OC)ccc2)ccc1	N-(3-Bromophenyl)-2-(3-methoxyphenyl)pyrido[2,3-d]-pyrimidin-4-amine	Krapf_2018	IC50	1.530 uM	1
340	O=[N+]([O-])c1cc(Nc2nc(nc3ncccc23)-c2cccnc2)ccc1	N-(3-Nitrophenyl)-2-(pyridin-3-yl)pyrido[2,3-d]pyrimidin-4-amine	Krapf_2018	IC50	not active	0
341	O=[N+]([O-])c1ccc(Nc2nc(nc3ncccc23)-c2cccnc2)cc1	N-(4-Nitrophenyl)-2-(pyridin-3-yl)pyrido[2,3-d]pyrimidin-4-amine	Krapf_2018	IC50	not active	0
342	Fc1cc(Nc2nc(nc3ncccc23)-c2cccnc2)ccc1	N-(3-Fluorophenyl)-2-(pyridin-3-yl)pyrido[2,3-d]pyrimidin-4-amine	Krapf_2018	IC50	1.230 uM	1
343	FC(F)(F)c1ccc(cc1)C(=O)Nc1ccccc1-c1oc(nn1)-c1ccc(OC)cc1	N-(2-(5-(4-methoxyphenyl)-1,3,4-oxadiazol-2-yl)phenyl)-4-(trifluoromethyl)benzamid	Koehler_2018	IC50	0.0900 uM	1
344	o1c(nnc1-c1ccc(OC)cc1)-c1ccccc1NC(=O)c1ccc(OC)cc1	4-Methoxy-N-(2-(5-(4-methoxyphenyl)-1,3,4-oxadiazol-2-yl)phenyl)benzamide	Koehler_2018	IC50	0.438 uM	1
345	o1c(nnc1-c1ccccc1)-c1ccccc1NC(=O)c1ccccc1	N-(2-(5-phenyl-1,3,4-oxadiazol-2-yl)phenyl)benzamide	Koehler_2018	IC50	0.112 uM	1
346	FC(F)(F)c1ccc(cc1)C(=O)Nc1ccccc1-n1nnc(c1)-c1ccc(OC)cc1	N-(2-(4-(4-methoxyphenyl)-1H-1,2,3-triazol-1-yl)phenyl)-4-(trifluoromethyl)benzamid	Koehler_2018	IC50	0.766 uM	1
347	O(C)c1ccc(cc1)-c1nnn(c1)-c1ccccc1NC(=O)c1ccc(OC)cc1	4-Methoxy-N-(2-(4-(4-methoxyphenyl)-1H-1,2,3-triazol-1-yl)phenyl)benzamide	Koehler_2018	IC50	2.36 uM	1
348	FC(F)(F)c1ccc(NC(=O)c2ccccc2-c2nn(nn2)-c2ccc(OC)cc2)cc1	2-(2-(4-Methoxyphenyl)-2H-tetrazol-5-yl)-N-(4-(trifluoromethyl)phenyl)benzamid	Koehler_2018	IC50	ne	0
349	O(C)c1ccc(NC(=O)c2ccccc2-c2nn(nn2)-c2ccc(OC)cc2)cc1	N-(4-methoxyphenyl)-2-(2-(4-methoxyphenyl)-2H-tetrazol-5-yl)benzamide	Koehler_2018	IC50	ne	0
350	S(=O)(=O)(Nc1ccccc1-c1nn(nn1)-c1ccc(OC)cc1)c1ccc(OC)cc1	4-Methoxy-N-(2-(2-(4-methoxyphenyl)-2H-tetrazol-5-yl)phenyl)benzenesulfonamide	Koehler_2018	IC50	7.67 uM	1
351	n1n(nnc1-c1ccccc1-c1ccccc1)-c1ccccc1	5-([1,1'-biphenyl]-2-yl)-2-phenyl-2H-tetrazole	Koehler_2018	IC50	8.34 uM	1
352	O(C)c1ccc(-n2nc(nn2)-c2ccccc2NC(=O)C)cc1	N-(2-(2-(4-methoxyphenyl)-2H-tetrazol-5-yl)phenyl)acetamide	Koehler_2018	IC50	3.23 uM	1
353	O=C(Nc1ccccc1-c1nn(nn1)-c1ccccc1)C	N-(2-(2-phenyl-2H-tetrazol-5-yl)phenyl)acetamide	Koehler_2018	IC50	6.91 uM	1
354	O(C)c1ccc(-n2nc(nn2)-c2ccccc2NC(=O)C2CCCCC2)cc1	N-(2-(2-(4-methoxyphenyl)-2H-tetrazol-5-yl)phenyl)cyclohexanecarboxamide	Koehler_2018	IC50	0.565 uM	1
355	O=C(Nc1ccccc1-c1nn(nn1)-c1ccccc1)C1CCCCC1	N-(2-(2-phenyl-2H-tetrazol-5-yl)phenyl)cyclohexanecarboxamide	Koehler_2018	IC50	0.287 uM	1
356	O=C(Nc1ccccc1-c1nn(nn1)-c1ccccc1)C12CC3CC(C1)CC(C2)C3	N-(2-(2-Phenyl-2H-tetrazol-5-yl)phenyl)adamantane-1-carboxamide	Koehler_2018	IC50	1.06 uM	1
357	O(C)c1ccc(-n2nc(nn2)-c2ccccc2NC(=O)c2c3c(ccc2)cccc3)cc1	N-(2-(2-(4-Methoxyphenyl)-2H-tetrazol-5-yl)phenyl)-1-naphthamide	Koehler_2018	IC50	0.267 uM	1
358	O=C(Nc1ccccc1-c1nn(nn1)-c1ccccc1)c1c2c(ccc1)cccc2	N-(2-(2-Phenyl-2H-tetrazol-5-yl)phenyl)-1-naphthamide	Koehler_2018	IC50	0.430 uM	1
359	O(C)c1ccc(-n2nc(nn2)-c2ccccc2NC(=O)c2cc3c(nc2)cccc3)cc1	N-(2-(2-(4-Methoxyphenyl)-2H-tetrazol-5-yl)phenyl)quinoline-3-carboxamide	Koehler_2018	IC50	0.228 uM	1
360	O=C(Nc1ccccc1-c1nn(nn1)-c1ccccc1)c1cc2c(nc1)cccc2	N-(2-(2-Phenyl-2H-tetrazol-5-yl)phenyl)quinoline-3-carboxamide	Koehler_2018	IC50	0.176 uM	1
361	O=C(Nc1ccccc1-c1nn(nn1)-c1ccccc1)c1ccncc1	N-(2-(2-Phenyl-2H-tetrazol-5-yl)phenyl)isonicotinamide	Koehler_2018	IC50	0.287 uM	1
362	O=C(Nc1ccccc1-c1nn(nn1)-c1ccccc1)c1ncccc1	N-(2-(2-Phenyl-2H-tetrazol-5-yl)phenyl)picolinamide	Koehler_2018	IC50	0.445 uM	1
363	O=C(Nc1ccccc1-c1nn(nn1)-c1ccccc1)c1cccnc1	N-(2-(2-Phenyl-2H-tetrazol-5-yl)phenyl)nicotinamide	Koehler_2018	IC50	0.733 uM	1
364	s1cccc1C(=O)Nc1ccccc1-c1nn(nn1)-c1ccc(OC)cc1	N-(2-(2-(4-Methoxyphenyl)-2H-tetrazol-5-yl)phenyl)thiophene-2-carboxamide	Koehler_2018	IC50	0.351 uM	1
365	s1cccc1C(=O)Nc1ccccc1-c1nn(nn1)-c1ccccc1	N-(2-(2-Phenyl-2H-tetrazol-5-yl)phenyl)thiophene-2-carboxamide	Koehler_2018	IC50	0.270 uM	1
366	O1c2cc(ccc2OC1)C(=O)Nc1ccccc1-c1nn(nn1)-c1ccccc1	N-(2-(2-Phenyl-2H-tetrazol-5-yl)phenyl)benzo[d][1,3]dioxole-5-carboxamide	Koehler_2018	IC50	0.259 uM	1
367	O1CCOc2c1cc(cc2)C(=O)Nc1ccccc1-c1nn(nn1)-c1ccccc1	N-(2-(2-Phenyl-2H-tetrazol-5-yl)phenyl)-2,3-dihydrobenzo[b][1,4]dioxine-6-carboxamide	Koehler_2018	IC50	0.190 uM	1
368	O(C)c1ccc(cc1)C(=O)Nc1ccccc1-c1nnn[n-]1	N-(2-(1H-Tetrazol-5-yl)phenyl)-4-methoxybenzamide	Koehler_2018	IC50	ne	0
369	O=C(Nc1ccccc1-c1nnn[n-]1)c1ccccc1	N-(2-(1H-Tetrazol-5-yl)phenyl)benzamide	Koehler_2018	IC50	ne	0
370	O(C)c1cc(-c2nn(nn2)-c2ccc(OC)cc2)c(NC(=O)c2ccc([N+](=O)[O-])cc2)cc1	N-(4-Methoxy-2-(2-(4-methoxyphenyl)-2H-tetrazol-5-yl)phenyl)-4-nitrobenzamide	Koehler_2018	IC50	0.129 uM	1
371	FC(F)(F)c1ccc(cc1)C(=O)Nc1ccc(OC)cc1-c1nn(nn1)-c1ccc(OC)cc1	N-(4-Methoxy-2-(2-(4-methoxyphenyl)-2H-tetrazol-5-yl)phenyl)-4-(trifluoromethyl)benzamide	Koehler_2018	IC50	0.0774 uM	1
372	FC(F)(F)c1ccc(cc1)C(=O)Nc1ccccc1-c1nn(nn1)-c1ccc(OC)nc1	N-(2-(2-(6-Methoxypyridin-3-yl)-2H-tetrazol-5-yl)phenyl)-4-(trifluoromethyl)benzamide	Koehler_2018	IC50	0.130 uM	1
373	O(C)c1ccc(cc1)C(=O)Nc1ccccc1-c1nn(nn1)-c1ccc(OC)nc1	4-Methoxy-N-(2-(2-(6-methoxypyridin-3-yl)-2H-tetrazol-5-yl)phenyl)benzamide	Koehler_2018	IC50	0.0616 uM	1
374	O(C)c1ncc(-n2nc(nn2)-c2ccccc2NC(=O)c2ccccc2)cc1	N-(2-(2-(6-Methoxypyridin-3-yl)-2H-tetrazol-5-yl)phenyl)benzamide	Koehler_2018	IC50	0.102 uM	1
375	O=C(Nc1ccccc1-c1nn(nn1)-c1ccccc1)c1ccccc1	N-(2-(2-phenyl-2H-tetrazol-5-yl)phenyl)-benzamide N-(2-(2-phenyl-2H-tetrazol-5-yl)phenyl)-benzamide	Koehler_2018 Koehler_2016	IC50 IC50 (uM)	0.0669 uM 0.0669	1
376	O=[N+]([O-])c1cc(Nc2nc(nc3c2cccc3)-c2ncccc2)ccc1	N-(3-Nitrophenyl)-2-(pyridin-2-yl)quinazolin-4-amine	Krapf_2017	IC50	0.376 uM	1
377	O=[N+]([O-])c1cc(Nc2nc(nc3c2cccc3)-c2cccnc2)ccc1	N-(3-Nitrophenyl)-2-(pyridin-3-yl)quinazolin-4-amine	Krapf_2017	IC50	0.105 uM	1
378	O=[N+]([O-])c1cc(Nc2nc(nc3c2cccc3)-c2ccncc2)ccc1	N-(3-Nitrophenyl)-2-(pyridin-4-yl)quinazolin-4-amine	Krapf_2017	IC50	0.117 uM	1
379	n1c(nc2c(cccc2)c1Nc1cc(ccc1)C#N)-c1ncccc1	3-((2-(Pyridin-2-yl)quinazolin-4-yl)amino)benzonitrile	Krapf_2017	IC50	0.507 uM	1
380	n1c(nc2c(cccc2)c1Nc1cc(ccc1)C#N)-c1cccnc1	3-((2-(Pyridin-3-yl)quinazolin-4-yl)amino)benzonitrile	Krapf_2017	IC50	0.108 uM	1
381	n1c(nc2c(cccc2)c1Nc1cc(ccc1)C#N)-c1ccncc1	3-((2-(Pyridin-4-yl)quinazolin-4-yl)amino)benzonitrile	Krapf_2017	IC50	0.134 uM	1
382	n1c(nc2c(cccc2)c1Nc1ccc(cc1)C#N)-c1cccnc1	4-((2-(Pyridin-3-yl)quinazolin-4-yl)amino)benzonitrile	Krapf_2017	IC50	0.166 uM	1
383	O(C)c1cc(Nc2nc(nc3c2cccc3)-c2ncccc2)ccc1	N-(3-Methoxyphenyl)-2-(pyridin-2-yl)quinazolin-4-amine	Krapf_2017	IC50	1.630 uM	1
384	O(C)c1cc(Nc2nc(nc3c2cccc3)-c2cccnc2)ccc1	N-(3-Methoxyphenyl)-2-(pyridin-3-yl)quinazolin-4-amine	Krapf_2017	IC50	1.020 uM	1
385	O(C)c1cc(Nc2nc(nc3c2cccc3)-c2ccncc2)ccc1	N-(3-Methoxyphenyl)-2-(pyridin-4-yl)quinazolin-4-amine	Krapf_2017	IC50	0.558 uM	1
386	O(C)c1ccc(Nc2nc(nc3c2cccc3)-c2ccncc2)cc1	N-(4-Methoxyphenyl)-2-(pyridin-4-yl)quinazolin-4-amine	Krapf_2017	IC50	0.742 uM	1
387	O(C)c1cc(Nc2nc(nc3c2cccc3)-c2ncccc2)ccc1OC	N-(3,4-Dimethoxyphenyl)-2-(pyridin-2-yl)quinazolin-4-amine	Krapf_2017	IC50	1.060 uM	1
388	O(C)c1cc(Nc2nc(nc3c2cccc3)-c2cccnc2)ccc1OC	N-(3,4-Dimethoxyphenyl)-2-(pyridin-3-yl)quinazolin-4-amine	Krapf_2017	IC50	0.753 uM	1
389	O(C)c1cc(Nc2nc(nc3c2cccc3)-c2ccncc2)ccc1OC	N-(3,4-Dimethoxyphenyl)-2-(pyridin-4-yl)quinazolin-4-amine	Krapf_2017	IC50	0.545 uM	1
390	FC(F)(F)c1cc(Nc2nc(nc3c2cccc3)-c2ccncc2)ccc1	2-(Pyridin-4-yl)-N-(3-(trifluoromethyl)phenyl)quinazolin-4-amine	Krapf_2017	IC50	0.216 uM	1
391	FC(F)(F)c1ccc(Nc2nc(nc3c2cccc3)-c2ccncc2)cc1	2-(Pyridin-4-yl)-N-(4-(trifluoromethyl)phenyl)quinazolin-4-amine	Krapf_2017	IC50	0.488 uM	1
392	FC(F)(F)c1cc(Nc2nc(nc3c2cccc3)-c2ccncc2)ccc1OC	N-(4-Methoxy-3-(trifluoromethyl)phenyl)-2-(pyridin-4-yl)-quinazolin-4-amine	Krapf_2017	IC50	0.146 uM	1
393	Fc1cc(Nc2nc(nc3c2cccc3)-c2cccnc2)ccc1	N-(3-Fluorophenyl)-2-(pyridin-3-yl)quinazolin-4-amine	Krapf_2017	IC50	0.156 uM	1
394	S(F)(=O)(=O)c1cc(Nc2nc(nc3c2cccc3)-c2ccncc2)ccc1	3-((2-(Pyridin-4-yl)quinazolin-4-yl)amino)benzenesulfonyl Fluoride	Krapf_2017	IC50	1.380 uM	1
395	n1c(nc2c(cccc2)c1Nc1cc(N(C)C)ccc1)-c1cccnc1	N1,N1-Dimethyl-N3-(2-(pyridin-3-yl)quinazolin-4-yl)benzene-1,3-diamine	Krapf_2017	IC50	1.200 uM	1
396	Oc1cc(Nc2nc(nc3c2cccc3)-c2ccncc2)ccc1	3-((2-(Pyridin-4-yl)quinazolin-4-yl)amino)phenol	Krapf_2017	IC50	1.070 uM	1
397	Oc1ccc(Nc2nc(nc3c2cccc3)-c2ccncc2)cc1	4-((2-(Pyridin-4-yl)quinazolin-4-yl)amino)phenol	Krapf_2017	IC50	4.260 uM	1
398	OCc1cc(Nc2nc(nc3c2cccc3)-c2ccncc2)ccc1	(3-((2-(pyridin-4-yl)quinazolin-4-yl)amino)phenyl)methanol	Krapf_2017	IC50	0.810 uM	1
399	OCc1cc(Nc2nc(nc3c2cccc3)-c2cccnc2)ccc1	(3-((2-(pyridin-3-yl)quinazolin-4-yl)amino)phenyl)methanol	Krapf_2017	IC50	0.921 uM	1
400	Oc1ccc(Nc2nc(nc3c2cccc3)-c2cccnc2)cc1[N+](=O)[O-]	2-Nitro-4-((2-(pyridin-3-yl)quinazolin-4-yl)amino)phenol	Krapf_2017	IC50	0.245 uM	1
401	O(C(=O)c1cc(Nc2nc(nc3c2cccc3)-c2cccnc2)ccc1)C	Methyl 3-((2-(Pyridin-3-yl)quinazolin-4-yl)amino)benzoate	Krapf_2017	IC50	0.362 uM	1
402	O(C(=O)c1cc(Nc2nc(nc3c2cccc3)-c2ccncc2)ccc1)C	Methyl 3-((2-(Pyridin-4-yl)quinazolin-4-yl)amino)benzoate	Krapf_2017	IC50	0.405 uM	1
403	O(C(=O)c1cc(Nc2nc(nc3c2cccc3)-c2ccncc2)ccc1)C(C)(C)C	tert-Butyl 3-((2-(Pyridin-4-yl)quinazolin-4-yl)amino)benzoate	Krapf_2017	IC50	0.299 uM	1
404	O=C([O-])c1cc(Nc2nc(nc3c2cccc3)-c2ccncc2)ccc1	3-((2-(pyridin-4-yl)quinazolin-4-yl)amino)benzoic acid	Krapf_2017	IC50	60.000 uM	0
405	O=C([O-])c1ccc(Nc2nc(nc3c2cccc3)-c2ccncc2)cc1	4-((2-(pyridin-4-yl)quinazolin-4-yl)amino)benzoic acid	Krapf_2017	IC50	9.640 uM	1
406	n1c(nc(Nc2cc(ccc2)C#N)cc1C)-c1ccncc1	3-((6-Methyl-2-(pyridin-4-yl)pyrimidin-4-yl)amino)benzonitrile	Krapf_2017	IC50	0.132 uM	1
407	O(C)c1cc(Nc2nc(nc(c2)C)-c2ccncc2)ccc1	N-(3-Methoxyphenyl)-6-methyl-2-(pyridin-4-yl)pyrimidin-4-amine	Krapf_2017	IC50	0.271 uM	1
408	O(C)c1ccc(Nc2nc(nc(c2)C)-c2ccncc2)cc1	N-(4-Methoxyphenyl)-6-methyl-2-(pyridin-4-yl)pyrimidin-4-amine	Krapf_2017	IC50	0.874 uM	1
409	n1c(nc(Nc2cc(ccc2)C#N)cc1C)-c1ccccc1	3-((6-Methyl-2-phenylpyrimidin-4-yl)amino)benzonitrile	Krapf_2017	IC50	0.122 uM	1
410	n1c(nc(Nc2ccc(cc2)C#N)cc1C)-c1ccccc1	4-((6-Methyl-2-phenylpyrimidin-4-yl)amino)benzonitrile	Krapf_2017	IC50	0.128 uM	1
411	Oc1ccc(Nc2nc(nc(c2)C)-c2ccccc2)cc1[N+](=O)[O-]	4-((6-Methyl-2-phenylpyrimidin-4-yl)amino)-2-nitrophenol	Krapf_2017	IC50	0.0988 uM	1
412	n1c(nc(Nc2ccccc2)cc1C)-c1ccccc1	6-Methyl-N,2-diphenylpyrimidin-4-amine	Krapf_2017	IC50	0.648 uM	1
413	n1c(nc2c(cccc2)c1Nc1ccc(cc1)C#N)-c1ccccc1	50 1	Krapf_2017 Krapf_2016	IC50 IC50 (uM)	0.0714 uM 0.0699	1
414	Oc1ccc(Nc2nc(nc3c2cccc3)-c2ccccc2)cc1[N+](=O)[O-]	51 4	Krapf_2017 Krapf_2016	IC50 IC50 (uM)	0.0811 uM 0.08	1
415	Oc1ccc(Nc2nc(nc3c2cccc3)-c2ccccc2)cc1	52 2	Krapf_2017 Krapf_2016	IC50 IC50 (uM)	0.211 uM 0.204	1
416	Fc1cc(Nc2nc(nc3c2cccc3)-c2ccccc2)ccc1	53 15	Krapf_2017 Krapf_2016	IC50 IC50 (uM)	0.363 uM 0.355	1
417	O=[N+]([O-])c1cc(ccc1)-c1nc(Nc2ccccc2)c2c(n1)cccc2	2-(3-nitrophenyl)-N-phenylquinazolin-4-amine	Krapf_2017_2	IC50	0.108	1
418	O=[N+]([O-])c1cc(ccc1)-c1nc(NC2CCCCC2)c2c(n1)cccc2	N-cyclohexyl-2-(3-nitrophenyl)quinazolin-4-amine	Krapf_2017_2	IC50	2.78	1
419	O=[N+]([O-])c1cc(ccc1)-c1nc(Nc2cc([N+](=O)[O-])ccc2)c2c(n1)cccc2	N,2-bis(3-nitrophenyl)quinazolin-4-amine	Krapf_2017_2	IC50	0.236	1
420	Oc1ccc(Nc2nc(nc3c2cccc3)-c2cc([N+](=O)[O-])ccc2)cc1[N+](=O)[O-]	2-nitro-4-((2-(3-nitrophenyl)quinazolin-4-yl)amino)phenol	Krapf_2017_2	IC50	0.151	1
421	O=[N+]([O-])c1cc(ccc1)-c1nc(Nc2cc(ccc2)C#N)c2c(n1)cccc2	3-((2-(3-nitrophenyl)quinazolin-4-yl)amino)benzonitrile	Krapf_2017_2	IC50	0.12	1
422	O(C)c1cc(Nc2nc(nc3c2cccc3)-c2cc([N+](=O)[O-])ccc2)ccc1	N-(3-methoxyphenyl)-2-(3-nitrophenyl)quinazolin-4-amine	Krapf_2017_2	IC50	0.121	1
423	O(C)c1cc(Nc2nc(nc3c2cccc3)-c2cc([N+](=O)[O-])ccc2)ccc1OC	N-(3,4-dimethoxyphenyl)-2-(3-nitrophenyl)quinazolin-4-amine	Krapf_2017_2	IC50	0.0556	1
424	Brc1ccc(Nc2nc(nc3c2cccc3)-c2cc([N+](=O)[O-])ccc2)cc1OC	N-(4-bromo-3-methoxyphenyl)-2-(3-nitrophenyl)quinazolin-4-amine	Krapf_2017_2	IC50	0.801	1
425	O(CC)c1cc(Nc2nc(nc3c2cccc3)-c2cc([N+](=O)[O-])ccc2)ccc1OCC	N-(3,4-diethoxyphenyl)-2-(3-nitrophenyl)quinazolin-4-amine	Krapf_2017_2	IC50	0.21	1
426	O1CCOc2c1cc(Nc1nc(nc3c1cccc3)-c1cc([N+](=O)[O-])ccc1)cc2	N-(2,3-dihydrobenzo[b][1,4]dioxin-6-yl)-2-(3-nitrophenyl)quinazolin-4-amine	Krapf_2017_2	IC50	0.263	1
427	S(C)c1cc(Nc2nc(nc3c2cccc3)-c2cc([N+](=O)[O-])ccc2)ccc1	N-(3-(methylthio)phenyl)-2-(3-nitrophenyl)quinazolin-4-amine	Krapf_2017_2	IC50	0.0948	1
428	S(C)c1ccc(Nc2nc(nc3c2cccc3)-c2cc([N+](=O)[O-])ccc2)cc1	N-(4-(methylthio)phenyl)-2-(3-nitrophenyl)quinazolin-4-amine	Krapf_2017_2	IC50	0.0886	1
429	O=[N+]([O-])c1cc(ccc1)-c1nc(Nc2cc(N)ccc2)c2c(n1)cccc2	N1-(2-(3-nitrophenyl)quinazolin-4-yl)benzene-1,3-diamine	Krapf_2017_2	IC50	0.284	1
430	O=[N+]([O-])c1cc(ccc1)-c1nc(Nc2cc(N(C)C)ccc2)c2c(n1)cccc2	N1,N1-dimethyl-N3-(2-(3-nitrophenyl)quinazolin-4-yl)benzene-1,3-diamine	Krapf_2017_2	IC50	0.221	1
431	O=[N+]([O-])c1cc(ccc1)-c1nc(Nc2cc(N(CC)CC)ccc2)c2c(n1)cccc2	N1,N1-diethyl-N3-(2-(3-nitrophenyl)quinazolin-4-yl)benzene-1,3-diamine	Krapf_2017_2	IC50	0.23	1
432	O=C(Nc1cc(Nc2nc(nc3c2cccc3)-c2cc([N+](=O)[O-])ccc2)ccc1)C	N-(3-((2-(3-nitrophenyl)quinazolin-4-yl)amino)phenyl) acetamide	Krapf_2017_2	IC50	0.127	1
433	Ic1ccc(Nc2nc(nc3c2cccc3)-c2cc([N+](=O)[O-])ccc2)cc1	N-(4-iodophenyl)-2-(3-nitrophenyl)quinazolin-4-amine	Krapf_2017_2	IC50	1.77	1
434	O=[N+]([O-])c1cc(Nc2nc(nc3c2cccc3)-c2ccc([N+](=O)[O-])cc2)ccc1	N-(3-nitrophenyl)-2-(4-nitrophenyl)quinazolin-4-amine	Krapf_2017_2	IC50	0.166	1
435	O=[N+]([O-])c1ccc(cc1)-c1nc(Nc2cc(ccc2)C#N)c2c(n1)cccc2	3-((2-(4-nitrophenyl)quinazolin-4-yl)amino)benzonitrile	Krapf_2017_2	IC50	0.336	1
436	O(C)c1cc(Nc2nc(nc3c2cccc3)-c2ccc([N+](=O)[O-])cc2)ccc1	N-(3-methoxyphenyl)-2-(4-nitrophenyl)quinazolin-4-amine	Krapf_2017_2	IC50	0.107	1
437	O(C)c1cc(Nc2nc(nc3c2cccc3)-c2ccc([N+](=O)[O-])cc2)ccc1OC	N-(3,4-dimethoxyphenyl)-2-(4-nitrophenyl)quinazolin-4-amine	Krapf_2017_2	IC50	0.0867	1
438	O(C)c1ccc(Nc2nc(nc3c2cccc3)-c2cc(ccc2)C#N)cc1O	3-(4-((3-hydroxy-4-methoxyphenyl)amino)quinazolin-2-yl) benzonitrile	Krapf_2017_2	IC50	0.297	1
439	O=C(Nc1cc(Nc2nc(nc3c2cccc3)-c2cc(ccc2)C#N)ccc1)C	N-(3-((2-(3-cyanophenyl)quinazolin-4-yl)amino)phenyl) acetamide	Krapf_2017_2	IC50	0.225	1
440	O(C)c1ccccc1-c1nc(Nc2cc([N+](=O)[O-])ccc2)c2c(n1)cccc2	2-(2-methoxyphenyl)-N-(3-nitrophenyl)quinazolin-4-amine	Krapf_2017_2	IC50	0.642	1
441	O(C)c1cc(ccc1)-c1nc(Nc2cc([N+](=O)[O-])ccc2)c2c(n1)cccc2	2-(3-methoxyphenyl)-N-(3-nitrophenyl)quinazolin-4-amine	Krapf_2017_2	IC50	0.139	1
442	O(C)c1cc(ccc1)-c1nc(Nc2ccc([N+](=O)[O-])cc2)c2c(n1)cccc2	2-(3-methoxyphenyl)-N-(4-nitrophenyl)quinazolin-4-amine	Krapf_2017_2	IC50	0.068	1
443	O(C)c1cc(ccc1)-c1nc(Nc2cc([N+](=O)[O-])cc([N+](=O)[O-])c2)c2c(n1)cccc2	N-(3,5-dinitrophenyl)-2-(3-methoxyphenyl)quinazolin-4-amine	Krapf_2017_2	IC50	0.291	1
444	Fc1ccc(Nc2nc(nc3c2cccc3)-c2cc(OC)ccc2)cc1[N+](=O)[O-]	N-(4-fluoro-3-nitrophenyl)-2-(3-methoxyphenyl)quinazolin-4-amine	Krapf_2017_2	IC50	1.19	1
445	O(C)c1cc(ccc1)-c1nc(Nc2cc(ccc2)C#N)c2c(n1)cccc2	3-((2-(3-methoxyphenyl)quinazolin-4-yl)amino)benzonitrile	Krapf_2017_2	IC50	0.359	1
446	Fc1cc(Nc2nc(nc3c2cccc3)-c2cc(OC)ccc2)ccc1	N-(3-fluorophenyl)-2-(3-methoxyphenyl)quinazolin-4-amine	Krapf_2017_2	IC50	1.64	1
447	O(C)c1cc(ccc1)-c1nc(Nc2cc(OC)ccc2)c2c(n1)cccc2	N,2-bis(3-methoxyphenyl)quinazolin-4-amine	Krapf_2017_2	IC50	0.811	1
448	O(C)c1cc(Nc2nc(nc3c2cccc3)-c2cc(OC)ccc2)ccc1OC	N-(3,4-dimethoxyphenyl)-2-(3-methoxyphenyl)quinazolin-4-amine	Krapf_2017_2	IC50	0.48	1
449	O(C)c1ccc(cc1)-c1nc(Nc2cc([N+](=O)[O-])ccc2)c2c(n1)cccc2	2-(4-methoxyphenyl)-N-(3-nitrophenyl)quinazolin-4-amine	Krapf_2017_2	IC50	0.183	1
450	O(C)c1ccc(cc1)-c1nc(Nc2cc(ccc2)C#N)c2c(n1)cccc2	3-((2-(4-methoxyphenyl)quinazolin-4-yl)amino)benzonitrile	Krapf_2017_2	IC50	2.12	1
451	O(C)c1cc(Nc2nc(nc3c2cccc3)-c2ccc(OC)cc2)ccc1	N-(3-methoxyphenyl)-2-(4-methoxyphenyl)quinazolin-4-amine	Krapf_2017_2	IC50	2.14	1
452	O(C)c1cc(Nc2nc(nc3c2cccc3)-c2ccc(OC)cc2)ccc1OC	N-(3,4-dimethoxyphenyl)-2-(4-methoxyphenyl)quinazolin-4-amine	Krapf_2017_2	IC50	0.418	1
453	O(C)c1cc(ccc1OC)-c1nc(Nc2cc([N+](=O)[O-])cc([N+](=O)[O-])c2)c2c(n1)cccc2	2-(3,4-dimethoxyphenyl)-N-(3,5-dinitrophenyl)quinazolin-4-amine	Krapf_2017_2	IC50	0.61	1
454	O(C)c1cc(ccc1OC)-c1nc(Nc2cc([N+](=O)[O-])c(O)cc2)c2c(n1)cccc2	4-((2-(3,4-dimethoxyphenyl)quinazolin-4-yl)amino)-2-nitrophenol	Krapf_2017_2	IC50	0.305	1
455	FC(F)(F)c1cc(Nc2nc(nc3c2cccc3)-c2cc(OC)c(OC)cc2)ccc1OC	2-(3,4-dimethoxyphenyl)-N-(4-methoxy-3-(trifluoromethyl)phenyl)quinazolin-4-amine	Krapf_2017_2	IC50	0.795	1
456	O(C)c1cc(ccc1OC)-c1nc(Nc2cc(OC)ccc2)c2c(n1)cccc2	2-(3,4-dimethoxyphenyl)-N-(3-methoxyphenyl)quinazolin-4-amine	Krapf_2017_2	IC50	0.365	1
457	Brc1ccc(Nc2nc(nc3c2cccc3)-c2cc(OC)c(OC)cc2)cc1OC	N-(4-bromo-3-methoxyphenyl)-2-(3,4-dimethoxyphenyl) quinazolin-4-amine	Krapf_2017_2	IC50	0.0475	1
458	Fc1cc(Nc2nc(nc3c2cccc3)-c2cc(OC)c(OC)cc2)ccc1	2-(3,4-dimethoxyphenyl)-N-(3-fluorophenyl)quinazolin-4-amine	Krapf_2017_2	IC50	0.462	1
459	S(F)(=O)(=O)c1cc(Nc2nc(nc3c2cccc3)-c2cc(OC)c(OC)cc2)ccc1	3-((2-(3,4-dimethoxyphenyl)quinazolin-4-yl)amino)benzenesulfonyl fluorid	Krapf_2017_2	IC50	0.57	1
460	O1c2c(C(=O)C(O)=C1c1cc(O)c(O)c(O)c1)c(O)cc(O)c2	5281672	Sjostedt_2017	transport value（%）	0	1
461	O1c2c(c(O)c(O)c(O)c2)C(=O)C=C1c1ccccc1	5281605 Baicalein	Sjostedt_2017 flavonoids_Zhang_2005	transport value（%） reported by Montanari_2014	1 INHIBITOR	1
462	O1c2c(C(=O)C(O)=C1c1cc(OC)c(O)cc1)c(O)cc(O)c2	5281654	Sjostedt_2017	transport value（%）	1	1
463	O1c2c(C(=O)C=C1c1cc(O)c(O)cc1)c(O)cc(O[C@@H]1O[C@H](CO)[C@@H](O)[C@H](O)[C@H]1O)c2	5280637	Sjostedt_2017	transport value（%）	2	1
464	O1c2c(C(=O)C(O)=C1c1cc(O)c(O)cc1)c(O)cc(O)c2O[C@@H]1O[C@H](CO)[C@@H](O)[C@H](O)[C@H]1O	5281621	Sjostedt_2017	transport value（%）	2	1
465	O1[C@H](CO[C@@H]2O[C@@H](C)[C@H](O)[C@@H](O)[C@H]2O)[C@@H](O)[C@H](O)[C@@H](O)[C@@H]1Oc1cc(O)c2c(O[C@@H](CC2=O)c2cc(O)c(OC)cc2)c1	10621	Sjostedt_2017	transport value（%）	4	1
466	O1C=C(C(=O)c2c1cc(O)cc2O)c1ccc(O)cc1	5280961 Genistein	Sjostedt_2017 Imai_2004	transport value（%） reported by Montanari_2014	4 INHIBITOR	1
467	O1c2c(C(=O)[C@H](O)[C@H]1c1cc3O[C@@H]([C@H](Oc3cc1)CO)c1cc(OC)c(O)cc1)c(O)cc(O)c2	31553	Sjostedt_2017	transport value（%）	4	1
468	O1c2c(C(=O)C(O)=C1c1cc(O)c(O)cc1)c(O)cc(OC)c2	5281691	Sjostedt_2017	transport value（%）	5	1
469	O1c2c(ccc3c2cccc3)C(=O)C=C1c1ccccc1OC	190209	Sjostedt_2017	transport value（%）	9	1
470	O1c2c(C[C@@H]1C(C)=C)c1O[C@H]3[C@H](c4cc(OC)c(OC)cc4OC3)C(=O)c1cc2	6758	Sjostedt_2017	transport value（%）	10	1
471	O1C2=CC(=O)C=CC2=C\C(=C/2\Oc3c(N\2)cccc3)\C1=O	5386360	Sjostedt_2017	transport value（%）	11	1
472	s1cccc1C(=O)C1=Cc2c(OC1=O)cc(N(CC)CC)cc2	342536	Sjostedt_2017	transport value（%）	11	1
473	Oc1c2c3c(c4c5c(C(=O)c6c7c(c8c(c(C2=O)c(O)cc8O)c3c57)c(O)cc6O)c(O)cc4C)c(c1)C	5281051	Sjostedt_2017	transport value（%）	11	1
474	O1c2c(C(=O)[C@H](O)[C@H]1c1cc(O)c(O)cc1)c(O)cc(O)c2	439533	Sjostedt_2017	transport value（%）	12	1
475	O1c2c(c(O)c(O)c(O[C@@H]3O[C@H](C(=O)[O-])[C@@H](O)[C@H](O)[C@H]3O)c2)C(=O)C=C1c1ccccc1	64982	Sjostedt_2017	transport value（%）	15	1
476	O1c2c(cc3CCCN4CCCc2c34)C(=CC1=O)C	94517	Sjostedt_2017	transport value（%）	15	1
477	Oc1c(O)cc(cc1O)C(OCCCCCCCC)=O	61253	Sjostedt_2017	transport value（%）	16	1
478	O1c2c(C(=O)C[C@H]1c1cc(O)c(OC)cc1)c(O)cc(O)c2	72281 Hesperetin	Sjostedt_2017 Imai_2004	transport value（%） reported by Montanari_2014	17 INHIBITOR	1
479	O1c2c(C(=O)C(O[C@@H]3O[C@@H](C)[C@H](O)[C@@H](O)[C@H]3O)=C1c1cc(O)c(O)c(O)c1)c(O)cc(O)c2	5281673	Sjostedt_2017	transport value（%）	19	1
480	Oc1cc(ccc1O)CC(C(Cc1cc(O)c(O)cc1)C)C	4534	Sjostedt_2017	transport value（%）	21	1
481	O1c2c(C[C@@H](OC(=O)c3cc(O)c(O)c(O)c3)[C@H]1c1cc(O)c(O)cc1)c(O)cc(O)c2	107905	Sjostedt_2017	transport value（%）	22	1
482	O1c2c(cccc2)C(=O)C=C1c1ccccc1	10680	Sjostedt_2017	transport value（%）	25	1
483	O=C1NC(=O)NC=2NC(=O)NC1=2	1175	Sjostedt_2017	transport value（%）	30	1
484	O1CC(=CC1=O)[C@H]1CC[C@]2(O)[C@H]3[C@H](CC[C@]12C)[C@@]1([C@@H](C[C@@H](O[C@@H]2O[C@H](C)[C@@H](O[C@@H]4O[C@H](C)[C@@H](O[C@@H]5O[C@H](C)[C@@H](O[C@@H]6O[C@H](CO)[C@@H](O)[C@H](O)[C@H]6O)[C@@H](OC(=O)C)C5)[C@@H](O)C4)[C@@H](O)C2)CC1)CC3)C	10819737	Sjostedt_2017	transport value（%）	32	1
485	O1c2c(C(=O)C(O[C@@H]3O[C@H](CO[C@@H]4O[C@@H](C)[C@H](O)[C@@H](O)[C@H]4O)[C@@H](O)[C@H](O)[C@H]3O)=C1c1cc(O)c(O)cc1)c(O)cc(O)c2	5280805	Sjostedt_2017	transport value（%）	37	1
486	O1C=C(C(=O)c2c1cc(O)cc2)c1ccc(O)cc1	5281708	Sjostedt_2017	transport value（%）	37	1
487	O1c2c(C(=O)C=C1C)c(OC)c1c(occ1)c2OC	3828	Sjostedt_2017	transport value（%）	42	1
488	O1[C@H](COC(=O)c2cc(O)c(O)c(O)c2)[C@@H](O)[C@](O)(COC(=O)c2cc(O)c(O)c(O)c2)C1O	16211077	Sjostedt_2017	transport value（%）	48	1
489	O1CC(=CC1=O)[C@H]1CC[C@]2(O)[C@H]3[C@H](C[C@@H](O)[C@]12C)[C@@]1([C@@H](C[C@@H](O[C@@H]2O[C@H](C)[C@@H](O[C@@H]4O[C@H](C)[C@@H](O[C@@H]5O[C@H](C)[C@@H](O)[C@@H](O)C5)[C@@H](O)C4)[C@@H](O)C2)CC1)CC3)C	2724385 Digoxin	Sjostedt_2017 Matsson_2007	transport value（%） reported by Montanari_2014	55 INACTIVE	0
490	O1[C@H](CO)[C@@H](O)[C@H](O)[C@@H](O)[C@@H]1Oc1ccc(O)cc1	440936	Sjostedt_2017	transport value（%）	55	0
491	O1c2c(C[C@@H](O)[C@H]1c1cc(O)c(O)cc1)c(O)cc(O)c2	72276	Sjostedt_2017	transport value（%）	57	0
492	O1c2c(C=CC1=O)c(OC)c1c(occ1)c2	2355	Sjostedt_2017	transport value（%）	57	0
493	O1CC(=CC1=O)[C@@H]1[C@]2(CC[C@H]3[C@@H](CC[C@@H]4C[C@@H](O[C@@H]5O[C@H](C)[C@@H](O[C@@H]6O[C@H](C)[C@@H](O[C@@H]7O[C@H](C)[C@@H](O[C@@H]8O[C@H](CO)[C@@H](O)[C@H](O)[C@H]8O)[C@@H](OC(=O)C)C7)[C@@H](O)C6)[C@@H](O)C5)CC[C@]34C)[C@@]2(O)C[C@@H]1O)C	72604	Sjostedt_2017	transport value（%）	68	0
494	O1CC(=CC1=O)[C@H]1CC[C@]2(O)[C@H]3[C@H](CC[C@]12C)[C@@]1([C@@H](C[C@@H](O)CC1)CC3)C	4369270	Sjostedt_2017	transport value（%）	70	0
495	O1c2c(C=C(C(=O)c3ccccc3)C1=O)c1c(cc2)cccc1	736868	Sjostedt_2017	transport value（%）	70	0
496	O=C1C=C(C)C(=O)C=C1C(C)C	10281	Sjostedt_2017	transport value（%）	72	0
497	O(CC)c1cc2c(NC(C=C2C)(C)C)cc1	3293	Sjostedt_2017	transport value（%）	77	0
498	O1CC(=CC1=O)[C@H]1CC[C@]2(O)[C@H]3[C@H](C[C@@H](O)[C@]12C)[C@@]1([C@@H](C[C@@H](O[C@@H]2O[C@H](C)[C@@H](O[C@@H]4O[C@H](C)[C@@H](O[C@@H]5O[C@H](C)[C@@H](O[C@@H]6O[C@H](CO)[C@@H](O)[C@H](O)[C@H]6O)[C@@H](OC(=O)C)C5)[C@@H](O)C4)[C@@H](O)C2)CC1)CC3)C	656630	Sjostedt_2017	transport value（%）	79	0
499	O1c2cc(N(CC)CC)ccc2C=C(c2nc3c(n2C)cccc3)C1=O	100335	Sjostedt_2017	transport value（%）	79	0
500	O1c2c(C=CC1=O)c(OC)c1c(occ1)c2OC	68079	Sjostedt_2017	transport value（%）	81	0
501	O1c2c(C=CC1=O)cc1c(occ1)c2OC	4114	Sjostedt_2017	transport value（%）	82	0
502	O1[C@H](CO)[C@@H](O)[C@H](O)[C@@H](O)[C@@H]1Oc1c2c(ccc1)[C@H](c1c(C2=O)c(O)cc(c1)C(=O)[O-])[C@@H]1c2c(C(=O)c3c1cccc3O[C@@H]1O[C@H](CO)[C@@H](O)[C@H](O)[C@H]1O)c(O)cc(c2)C(=O)[O-]	91440	Sjostedt_2017	transport value（%）	82	0
503	O1c2cc(O)c(O[C@@H]3O[C@H](CO)[C@@H](O)[C@H](O)[C@H]3O)cc2C=CC1=O	5281417	Sjostedt_2017	transport value（%）	83	0
504	O1c2c(C[C@@H](O)[C@H]1c1cc(O)c(O)c(O)c1)c(O)cc(O)c2	72277 Epigallocatechin	Sjostedt_2017 flavonoids_Zhang_2004	transport value（%） reported by Montanari_2014	85 INACTIVE	0
505	O1[C@@H]2O[C@@]3(OO[C@]24[C@@H](CC[C@H]([C@@H]4CC3)C)[C@@H](C)C1=O)C	68827	Sjostedt_2017	transport value（%）	86	0
506	O1CC(=CC1=O)[C@@H]1[C@]2(CC[C@H]3[C@@H](CC[C@@H]4C[C@@H](O[C@@H]5O[C@H](C)[C@@H](O[C@@H]6O[C@H](C)[C@@H](O[C@@H]7O[C@H](C)[C@@H](O)[C@@H](O)C7)[C@@H](O)C6)[C@@H](O)C5)CC[C@]34C)[C@@]2(O)C[C@@H]1O)C	91540	Sjostedt_2017	transport value（%）	87	0
507	Oc1cc(ccc1O)C[C@@H](OC(=O)\C=C\c1cc(O)c(O)cc1)C(=O)[O-]	5281792	Sjostedt_2017	transport value（%）	87	0
508	Oc1cccc(O)c1C(=O)[O-]	9338	Sjostedt_2017	transport value（%）	89	0
509	O(C)c1c(OC)cc(cc1OC)C(=O)[O-]	8357	Sjostedt_2017	transport value（%）	89	0
510	O[C@@H]([C@H]1[NH+]2C[C@@H]([C@H](C1)CC2)C=C)c1c2c(ncc1)cccc2	101744	Sjostedt_2017	transport value（%）	90	0
511	Oc1ccccc1CC(=O)[O-]	11970	Sjostedt_2017	transport value（%）	93	0
512	Oc1ccc(O)cc1	785	Sjostedt_2017	transport value（%）	93	0
513	O1c2c(CCC1(C(=O)[O-])C)c(C)c(O)c(C)c2C	40634	Sjostedt_2017	transport value（%）	94	0
514	Oc1cc(ccc1)CC(=O)[O-]	12122	Sjostedt_2017	transport value（%）	95	0
515	Oc1cc(ccc1)\C=C\C(=O)[O-]	637541	Sjostedt_2017	transport value（%）	95	0
516	Oc1c(O)cccc1O	1057	Sjostedt_2017	transport value（%）	95	0
517	O1[C@H](CO)[C@@H](O)[C@H](O)[C@@H](O)[C@@H]1Oc1cc2OC=C(C(=O)c2cc1)c1ccc(O)cc1	107971	Sjostedt_2017	transport value（%）	96	0
518	O(C)c1cc(ccc1O)C(=O)[O-]	8468	Sjostedt_2017	transport value（%）	98	0
519	ClS(=O)(=O)c1c2c(ccc1)c(N(C)C)ccc2	11801	Sjostedt_2017	transport value（%）	98	0
520	O1[C@@H](Oc2ccccc2CO)C(O)C(O)[C@H](O)C1CO	71306773	Sjostedt_2017	transport value（%）	98	0
521	Oc1c(cccc1O)C(=O)[O-]	19	Sjostedt_2017	transport value（%）	99	0
522	O1c2c(cccc2)C([O-])=CC1=O	54682930	Sjostedt_2017	transport value（%）	99	0
523	Oc1cc(O)ccc1	5054	Sjostedt_2017	transport value（%）	99	0
524	O=C([O-])c1ccccc1	243	Sjostedt_2017	transport value（%）	100	0
525	Oc1ccccc1O	289	Sjostedt_2017	transport value（%）	100	0
526	O[C@H]([C@@H]1[NH+]2C[C@@H]([C@H](C1)CC2)C=C)c1c2c(ncc1)cccc2	90454	Sjostedt_2017	transport value（%）	100	0
527	Oc1ccccc1\C=C\C(=O)[O-]	637540	Sjostedt_2017	transport value（%）	100	0
528	O(C)c1cc2c(nccc2[C@@H](O)[C@H]2[NH+]3C[C@@H]([C@H](C2)CC3)C=C)cc1	3034034	Sjostedt_2017	transport value（%）	101	0
529	O1[C@H]([C@@H](O)CO)C([O-])=C(O)C1=O	54670067	Sjostedt_2017	transport value（%）	101	0
530	O=C([O-])c1ccccc1C(=O)[O-]	1017	Sjostedt_2017	transport value（%）	101	0
531	Oc1cc(cc(O)c1)C(=O)[O-]	7424	Sjostedt_2017	transport value（%）	103	0
532	O1CC(=CC1=O)[C@@H]1[C@]2(CC[C@H]3[C@@H](CC[C@@H]4C[C@@H](O)CC[C@]34C)[C@@]2(O)C[C@@H]1O)C	348482	Sjostedt_2017	transport value（%）	103	0
533	O1c2c(cc(OC)c(O)c2O)C=CC1=O	5273569	Sjostedt_2017	transport value（%）	103	0
534	O1c2c(C=CC1=O)cc1c(occ1)c2	6199	Sjostedt_2017	transport value（%）	105	0
535	O1c2cc(O)c(O)cc2C=CC1=O	5281416	Sjostedt_2017	transport value（%）	107	0
536	Oc1cc(ccc1O)C	9958	Sjostedt_2017	transport value（%）	107	0
537	Oc1ccc(O)cc1C(=O)[O-]	3469	Sjostedt_2017	transport value（%）	108	0
538	Oc1cc(ccc1C)C	7267	Sjostedt_2017	transport value（%）	108	0
539	O1c2cc(O)c(OC)cc2C=CC1=O	5280460	Sjostedt_2017	transport value（%）	110	0
540	Oc1ccc(cc1)C(=O)C	7469	Sjostedt_2017	transport value（%）	112	0
541	Oc1c(O)cc(cc1O)C(OC(C)C)=O	70826	Sjostedt_2017	transport value（%）	113	0
542	O1c2c(C=CC1=O)ccc(O)c2O	5280569	Sjostedt_2017	transport value（%）	114	0
543	O1c2cc(O)ccc2C=CC1=O	5281426	Sjostedt_2017	transport value（%）	114	0
544	Oc1cc(ccc1)C(=O)C	8487	Sjostedt_2017	transport value（%）	114	0
545	O1c2c(ccc(O)c2O)C(=CC1=O)C	5355836	Sjostedt_2017	transport value（%）	115	0
546	Oc1ccc(cc1)CC(=O)[O-]	127	Sjostedt_2017	transport value（%）	115	0
547	O1c2cc(OC)ccc2C=CC1=O	10748	Sjostedt_2017	transport value（%）	116	0
548	Oc1c(cc(cc1C(C)(C)C)C)C(C)(C)C	31404	Sjostedt_2017	transport value（%）	118	0
549	Oc1cc(ccc1C(C)C)C	6989	Sjostedt_2017	transport value（%）	121	0
550	O1c2c(cc(cc2)C)C=CC1=O	7092	Sjostedt_2017	transport value（%）	131	0
551	O=C(N1CCc2c([nH]c3c2cccc3)C1CC(C)C)c1ccccc1	21	Spindler_2016	IC50 (uM)	2.33	1
552	O=C(N1CCc2c([nH]c3c2cccc3)C1c1ccccc1)c1ccccc1	22	Spindler_2016	IC50	2.78	1
553	O(C)c1cc(ccc1)C1N(CCc2c1[nH]c1c2cccc1)C(=O)c1ccccc1	23	Spindler_2016	IC50	1.92	1
554	O(C)c1ccc(cc1)C1N(CCc2c1[nH]c1c2cccc1)C(=O)c1ccccc1	24	Spindler_2016	IC50	2.21	1
555	O(C)c1cc(ccc1OC)C1N(CCc2c1[nH]c1c2cccc1)C(=O)c1ccccc1	25	Spindler_2016	IC50	3.62	1
556	O=C(N1CCc2c([nH]c3c2cccc3)C1c1ccc(cc1)C)c1ccccc1	26	Spindler_2016	IC50	1.43	1
557	O=C(N1CCc2c([nH]c3c2cccc3)C1c1cc(ccc1)C#N)c1ccccc1	27	Spindler_2016	IC50	2	1
558	O=C(N1CCc2c([nH]c3c2cccc3)C1c1ccc(NC(=O)C)cc1)c1ccccc1	29	Spindler_2016	IC50	7.82	1
559	Fc1ccccc1C1N(CCc2c1[nH]c1c2cccc1)C(=O)c1ccccc1	31	Spindler_2016	IC50	4.49	1
560	Fc1ccc(cc1)C1N(CCc2c1[nH]c1c2cccc1)C(=O)c1ccccc1	32	Spindler_2016	IC50	1.89	1
561	Fc1cc(ccc1F)C1N(CCc2c1[nH]c1c2cccc1)C(=O)c1ccccc1	33	Spindler_2016	IC50	1.1	1
562	Brc1ccc(cc1)C1N(CCc2c1[nH]c1c2cccc1)C(=O)c1ccccc1	35	Spindler_2016	IC50	0.687	1
563	Clc1cc(ccc1)C1N(CCc2c1[nH]c1c2cccc1)C(=O)c1ccccc1	37	Spindler_2016	IC50	0.869	1
564	Clc1ccc(cc1)C1N(CCc2c1[nH]c1c2cccc1)C(=O)c1ccccc1	38	Spindler_2016	IC50	0.741	1
565	Clc1cc(ccc1Cl)C1N(CCc2c1[nH]c1c2cccc1)C(=O)c1ccccc1	39	Spindler_2016	IC50	0.328	1
566	Clc1ccc(cc1)C(=O)N1CCc2c([nH]c3c2cccc3)C1c1cc(F)c(F)cc1	40	Spindler_2016	IC50	1.26	1
567	Brc1ccc(cc1)C1N(CCc2c1[nH]c1c2cccc1)C(=O)c1ccc(Cl)cc1	41	Spindler_2016	IC50	1.78	1
568	Clc1cc(ccc1Cl)C1N(CCc2c1[nH]c1c2cccc1)C(=O)c1ccc(Cl)cc1	42	Spindler_2016	IC50	1.03	1
569	Clc1cc(ccc1Cl)C1N(CCc2c1[nH]c1c2cccc1)C(=O)c1cc(OC)c(OC)cc1	43	Spindler_2016	IC50	0.698	1
570	Fc1cc(ccc1F)C1N(CCc2c1[nH]c1c2cccc1)C(=O)c1cc(OC)c(OC)cc1	44	Spindler_2016	IC50	1.1	1
571	Clc1cc(ccc1Cl)C1N(CCc2c1[nH]c1c2cccc1)C(=O)c1c2c(ccc1)cccc2	45	Spindler_2016	IC50	1.32	1
572	O(C)c1ccc(cc1)C(=O)N1CCc2c([nH]c3c2cccc3)C1c1ccccc1	46	Spindler_2016	IC50	1.75	1
573	O(C)c1cc(ccc1)C1N(CCc2c1[nH]c1c2cccc1)C(=O)c1ccc(OC)cc1	47	Spindler_2016	IC50	1.45	1
574	FC(F)(F)c1ccc(cc1)C1N(CCc2c1[nH]c1c2cccc1)C(=O)c1ccc(OC)cc1	48	Spindler_2016	IC50	1.23	1
575	Fc1cc(ccc1F)C1N(CCc2c1[nH]c1c2cccc1)C(=O)c1ccc(OC)cc1	49	Spindler_2016	IC50	0.805	1
576	Clc1cc(ccc1)C1N(CCc2c1[nH]c1c2cccc1)C(=O)c1ccc(OC)cc1	50	Spindler_2016	IC50	0.883	1
577	Clc1cc(ccc1Cl)C1N(CCc2c1[nH]c1c2cccc1)C(=O)c1ccc(OC)cc1	51	Spindler_2016	IC50	0.233	1
578	Clc1cc(ccc1Cl)C1N(CCc2c1[nH]c1c2cccc1)C(=O)c1cc(OC)ccc1	52	Spindler_2016	IC50	0.238	1
579	Clc1cc(ccc1Cl)C1N(CCc2c1[nH]c1c2cc(OC)cc1)C(=O)c1ccccc1	53	Spindler_2016	IC50	0.382	1
580	[NH+]1(CCN(CC1)c1ncnc2c1n1c(CCCC1)c2C#N)CCc1ccccc1	4-(4-phenethylpiperazin-1-yl)-6,7,8,9-tetrahydropyrimido[4,5-b]indolizine-10-carbonitrile	Schmitt_2016	IC50 (uM)	8.19	1
581	[NH+]1(CCN(CC1)c1ncnc2c1n1c(CCCC1)c2C#N)Cc1ccccc1	4-(4-benzylpiperazin-1-yl)-6,7,8,9-tetrahydropyrimido[4,5-b]indolizine-10-carbonitrile	Schmitt_2016	IC50	8.24	1
582	n1cnc2c(n3c(CCCC3)c2C#N)c1N1CCN(CC1)c1ccccc1	4-(4-phenylpiperazin-1-yl)-6,7,8,9-tetrahydropyrimido[4,5-b]indolizine-10-carbonitrile	Schmitt_2016	IC50	5.91	1
583	[NH+]1(CCN(CC1)c1ncnc2c1n1c(CCCC1)c2C#N)C	16	Schmitt_2016	IC50	4.25	1
584	[NH2+]1CCN(CC1)c1ncnc2c1n1c(CCCC1)c2C#N	17	Schmitt_2016	%inhibition at 10 uM	<25%	0
585	n1cnc2c(n3c(CCCC3)c2C#N)c1NCCCc1ccccc1	18	Schmitt_2016	IC50	6.07	1
586	n1cnc2c(n3c(CCCC3)c2C#N)c1NCCc1ccccc1	19	Schmitt_2016	%inhibition at 10 uM	<25%	0
587	n1cnc2c(n3c(CCCC3)c2C#N)c1Nc1ccccc1	21	Schmitt_2016	IC50	7.68	0
588	[NH+]1(CCN(CC1)c1ncnc2c1n1c(CCCCC1)c2C#N)CCc1ccccc1	22	Schmitt_2016	IC50	9.94	1
589	[NH+]1(CCN(CC1)c1ncnc2c1n1c(CCCCC1)c2C#N)Cc1ccccc1	23	Schmitt_2016	IC50	4.68	1
590	[NH+]1(CCN(CC1)c1ncnc2c1n1c(CCCCC1)c2C#N)C(c1ccccc1)c1ccccc1	24	Schmitt_2016	IC50	8.71	1
591	n1cnc2c(n3c(CCCCC3)c2C#N)c1N1CCN(CC1)c1ccccc1	25	Schmitt_2016	%inhibition at 10 uM	<25%	0
592	[NH+]1(CCN(CC1)c1ncnc2c1n(cc2C#N)C)CCc1ccccc1	26	Schmitt_2016	%inhibition at 10 uM	<25%	0
593	[NH+]1(CCN(CC1)c1ncnc2c1n(cc2C#N)CC)CCc1ccccc1	27	Schmitt_2016	%inhibition at 10 uM	<25%	0
594	[NH+]1(CCN(CC1)c1ncnc2c1n(cc2C#N)CCC)CCc1ccccc1	28	Schmitt_2016	%inhibition at 10 uM	<25%	0
595	[NH+]1(CCN(CC1)c1ncnc2c1n(cc2C#N)C(C)C)CCc1ccccc1	29	Schmitt_2016	%inhibition at 10 uM	<25%	0
596	[NH+]1(CCN(CC1)c1ncnc2c1n(cc2C#N)C1CC1)CCc1ccccc1	30	Schmitt_2016	%inhibition at 10 uM	<25%	0
597	[NH+]1(CCN(CC1)c1ncnc2c1n(cc2C#N)-c1ccccc1)CCc1ccccc1	31	Schmitt_2016	%inhibition at 10 uM	<25%	0
598	[NH+]1(CCN(CC1)c1ncnc2c1n(cc2C#N)-c1ccccc1)Cc1ccccc1	32	Schmitt_2016	%inhibition at 10 uM	<25%	0
599	[NH+]1(CCN(CC1)c1ncnc2c1n(cc2C#N)Cc1ccccc1)CCc1ccccc1	33	Schmitt_2016	%inhibition at 10 uM	<25%	0
600	[NH+]1(CCN(CC1)c1ncnc2c1n(cc2C#N)Cc1ccccc1)Cc1ccccc1	34	Schmitt_2016	%inhibition at 10 uM	<25%	0
601	[NH+]1(CCN(CC1)c1ncnc2c1n(cc2C#N)CCc1ccccc1)CCc1ccccc1	35	Schmitt_2016	%inhibition at 10 uM	<25%	0
602	[NH+]1(CCN(CC1)c1ncnc2c1n(cc2C#N)CCc1ccccc1)Cc1ccccc1	36	Schmitt_2016	%inhibition at 10 uM	<25%	0
603	[NH+]1(CCN(CC1)c1ncnc2c1n(cc2C#N)CCCc1ccccc1)CCc1ccccc1	37	Schmitt_2016	%inhibition at 10 uM	<25%	0
604	[NH+]1(CCN(CC1)c1ncnc2c1n(cc2C#N)CCCc1ccccc1)Cc1ccccc1	38	Schmitt_2016	%inhibition at 10 uM	<25%	0
605	Brc1ccccc1COc1c2c(OC(=CC2=O)C(=O)NCCc2c3cc(OC)ccc3[nH]c2)ccc1	5-(2'-Bromobenzyloxy)-4-oxo-4H-chromene-2-carboxylic acid [2-(5-methoxy-1H-indol-3-yl)-ethyl]-amide	Pires_2016	EC50 (uM)	0.086	1
606	Brc1cc(ccc1)COc1c2c(OC(=CC2=O)C(=O)NCCc2c3cc(OC)ccc3[nH]c2)ccc1	5-(3'-Bromobenzyloxy)-4-oxo-4H-chromene-2-carboxylic acid [2-(5-methoxy-1H-indol 3-yl)-ethyl]-amide	Pires_2016	EC50 (uM)	0.54	1
607	Fc1ccccc1COc1c2c(OC(=CC2=O)C(=O)NCCc2c3cc(OC)ccc3[nH]c2)ccc1	5-(2'-Fluorobenzyloxy)-4-oxo-4H-chromene-2-carboxylic acid [2-(5-methoxy-1H-indol-3-yl)-ethyl]-amide	Pires_2016	EC50 (uM)	0.55	1
608	Fc1cc(ccc1)COc1c2c(OC(=CC2=O)C(=O)NCCc2c3cc(OC)ccc3[nH]c2)ccc1	5-(3'-Fluorobenzyloxy)-4-oxo-4H-chromene-2-carboxylic acid [2-(5-methoxy-1H-indol-3-yl)-ethyl]-amide	Pires_2016	EC50 (uM)	0.38	1
609	Fc1ccc(cc1)COc1c2c(OC(=CC2=O)C(=O)NCCc2c3cc(OC)ccc3[nH]c2)ccc1	5-(4'-Fluorobenzyloxy)-4-oxo-4H-chromene-2-carboxylic acid [2-(5-methoxy-1H-indol-3-yl)-ethyl]-amide	Pires_2016	EC50 (uM)	0.26	1
610	Fc1cc(ccc1F)COc1c2c(OC(=CC2=O)C(=O)NCCc2c3cc(OC)ccc3[nH]c2)ccc1	5-(3',4'-Difluorobenzyloxy)-4-oxo-4H-chromene-2-carboxylic acid [2-(5-methoxy-1H-indol-3-yl)-ethyl]-amide	Pires_2016	EC50 (uM)	0.63	1
611	Brc1ccc(cc1)COc1c2c(OC(=CC2=O)C(=O)NCCc2c3cc(O)ccc3[nH]c2)ccc1	5-(4'-Bromobenzyloxy)-4-oxo-4H-chromene-2-carboxylic acid [2-(5-hydroxy-1H-indol-3-yl)-ethyl]-amide	Pires_2016	EC50 (uM)	4.35	1
612	Brc1ccc(cc1)COc1c2c(OC(=CC2=O)C(=O)NCCc2c3cc(OCC)ccc3[nH]c2)ccc1	5-(4'-Bromobenzyloxy)-4-oxo-4H-chromene-2-carboxylic acid [2-(5-ethoxy-1H-indol-3-yl)-ethyl]-amide	Pires_2016	EC50 (uM)	0.36	1
613	Brc1ccc(cc1)COc1c2c(OC(=CC2=O)C(=O)NCCc2c3cc(OCCC)ccc3[nH]c2)ccc1	5-(4'-Bromobenzyloxy)-4-oxo-4H-chromene-2-carboxylic acid [2-(5-propyloxy-1H-indol-3-yl)-ethyl]-amide	Pires_2016	EC50 (uM)	0.28	1
614	Brc1ccc(cc1)COc1c2c(OC(=CC2=O)C(=O)NCCc2c3cc(OC(C)C)ccc3[nH]c2)ccc1	5-(4'-Bromobenzyloxy)-4-oxo-4H-chromene-2-carboxylic acid [2-(5-isopropyloxy-1H-indol-3-yl)-ethyl]-amide	Pires_2016	EC50 (uM)	0.36	1
615	Brc1ccc(cc1)COc1c2c(OC(=CC2=O)C(=O)NCCc2c3c([nH]c2)cccc3)ccc1	5-(4'-Bromobenzyloxy)-4-oxo-4H-chromene-2-carboxylic acid [2-(1H-indol-3-yl)-ethyl]-amide	Pires_2016	EC50 (uM)	1.05	1
616	Brc1ccc(cc1)COc1c2c(OC(=CC2=O)C(=O)NC(C(C)C)C(=O)NCCc2c3cc(OC)ccc3[nH]c2)ccc1	2-[(5-(4'-Bromobenzyloxy)-4-oxo-4H-chromene-2-carbonyl)-amino]-3-methylbutyric acid [2-(5-methoxy-1H-indol-3-yl)-ethyl]-amide	Pires_2016	EC50 (uM)	0.34	1
617	Brc1ccc(cc1)COc1c2c(OC(=CC2=O)C(=O)NC(C(CC)C)C(=O)NCCc2c3cc(OC)ccc3[nH]c2)ccc1	2-[(5-(4'-Bromobenzyloxy)-4-oxo-4H-chromene-2-carbonyl)-amino]-3-methylpentanoic acid [2-(5-methoxy-1H-indol-3-yl)-ethyl]-amide	Pires_2016	EC50 (uM)	0.91	1
618	S(F)(=O)(=O)c1ccc(Nc2nc(nc3c2cccc3)-c2ccccc2)cc1	3	Krapf_2016	IC50 (uM)	0.556	1
619	O=[N+]([O-])c1cc(Nc2nc(nc3c2cccc3)-c2ccccc2)ccc1	5 12	Krapf_2016 phenylquinazolines_Juvale_2012	IC50 (uM) reported by Montanari_2014	0.13 INHIBITOR	1
620	n1c(nc2c(cccc2)c1Nc1cc(ccc1)C#N)-c1ccccc1	6 15	Krapf_2016 phenylquinazolines_Juvale_2012	IC50 (uM) reported by Montanari_2014	0.14 INHIBITOR	1
621	O=C(Nc1cc(Nc2nc(nc3c2cccc3)-c2ccccc2)ccc1)C	7	Krapf_2016	IC50 (uM)	0.278	1
622	S(C)c1cc(Nc2nc(nc3c2cccc3)-c2ccccc2)ccc1	8	Krapf_2016	IC50 (uM)	1.19	1
623	O(C)c1cc(Nc2nc(nc3c2cccc3)-c2ccccc2)ccc1	9 8	Krapf_2016 phenylquinazolines_Juvale_2012	IC50 (uM) reported by Montanari_2014	1.32 INHIBITOR	1
624	O(C)c1ccc(Nc2nc(nc3c2cccc3)-c2ccccc2)cc1	10 9	Krapf_2016 phenylquinazolines_Juvale_2012	IC50 (uM) reported by Montanari_2014	1.93 INHIBITOR	1
625	O(C)c1cc(Nc2nc(nc3c2cccc3)-c2ccccc2)ccc1OC	11 10	Krapf_2016 phenylquinazolines_Juvale_2012	IC50 (uM) reported by Montanari_2014	0.152 INHIBITOR	1
626	Fc1cc(Nc2nc(nc3c2cccc3)-c2ccccc2)ccc1OC	12	Krapf_2016	IC50 (uM)	0.872	1
627	Brc1ccc(Nc2nc(nc3c2cccc3)-c2ccccc2)cc1OC	13	Krapf_2016	IC50 (uM)	0.289	1
628	Ic1ccc(Nc2nc(nc3c2cccc3)-c2ccccc2)cc1C	14	Krapf_2016	IC50 (uM)	1.46	1
629	Fc1ccc(Nc2nc(nc3c2cccc3)-c2ccccc2)cc1	16	Krapf_2016	IC50 (uM)	1.06	1
630	Clc1ccc(Nc2nc(nc3c2cccc3)-c2ccccc2)cc1	17	Krapf_2016	IC50 (uM)	0.83	1
631	Ic1cc(Nc2nc(nc3c2cccc3)-c2ccccc2)ccc1	18	Krapf_2016	IC50 (uM)	0.791	1
632	Ic1ccc(Nc2nc(nc3c2cccc3)-c2ccccc2)cc1	19	Krapf_2016	IC50 (uM)	0.612	1
633	O(C(=O)c1ccc(Nc2nc(nc3c2cccc3)-c2ccccc2)cc1)C	20	Krapf_2016	IC50 (uM)	0.944	1
634	O(C(=O)c1ccc(Nc2nc(nc3c2cccc3)-c2ccccc2)cc1)C(C)(C)C	21	Krapf_2016	IC50 (uM)	5.65	1
635	O=C([O-])c1ccc(Nc2nc(nc3c2cccc3)-c2ccccc2)cc1	22	Krapf_2016	IC50 (uM)	6.38	1
636	n1c(nc2c(cccc2)c1Nc1cc(ccc1)C#C)-c1ccccc1	23	Krapf_2016	IC50 (uM)	0.672	1
637	n1c(nc2c(cccc2)c1Nc1cc(ccc1)C)-c1ccccc1	24	Krapf_2016	IC50 (uM)	1.15	1
638	n1c(nc2c(cccc2)c1Nc1ccc(cc1)C)-c1ccccc1	25	Krapf_2016	IC50 (uM)	1.48	1
639	n1c(nc2c(cccc2)c1Nc1cc(ccc1)C(C)(C)C)-c1ccccc1	26	Krapf_2016	IC50 (uM)	1.07	1
640	n1c(nc2c(cccc2)c1Nc1ccc(cc1)C(C)(C)C)-c1ccccc1	27	Krapf_2016	IC50 (uM)	1.06	1
641	O(C)c1cc(Nc2cc([nH+]c3c2cccc3)-c2ccccc2)ccc1	28	Krapf_2016	IC50 (uM)	0.951	1
642	S(C)c1cc(Nc2cc([nH+]c3c2cccc3)-c2ccccc2)ccc1	29	Krapf_2016	IC50 (uM)	1.9	1
643	O=C(Nc1cc(Nc2cc([nH+]c3c2cccc3)-c2ccccc2)ccc1)C	30	Krapf_2016	IC50 (uM)	1.63	1
644	[nH+]1c2c(cccc2)c(Nc2ccc(cc2)C#N)cc1-c1ccccc1	31	Krapf_2016	IC50 (uM)	0.846	1
645	Fc1cc(Nc2cc([nH+]c3c2cccc3)-c2ccccc2)ccc1	32	Krapf_2016	IC50 (uM)	2.13	1
646	O(C)c1cc(ccc1OC)\C=C\C(=O)c1cc(NC(=O)c2ccccc2)ccc1	(E)-N-{3-[3-(3,4-Dimethoxyphenyl)acryloyl]phenyl}benzamide	Kraege_2016	IC50 (uM)	2.18	1
647	Brc1cc(ccc1)C(=O)Nc1cc(ccc1)C(=O)\C=C\c1cc(OC)c(OC)cc1	(E)-3-Bromo-N-{3-[3-(3,4-dimethoxyphenyl)acryloyl]phenyl}benzamide	Kraege_2016	IC50 (uM)	2.99	1
648	O(C)c1cc(ccc1OC)\C=C\C(=O)c1ccc(NC(=O)c2ccccc2)cc1	(E)-N-{4-[3-(3,4-Dimethoxyphenyl)acryloyl]phenyl}benzamide	Kraege_2016	IC50 (uM)	1.3	1
649	O(C)c1cc(ccc1OC)\C=C\C(=O)c1ccc(NC(=O)c2ccccc2[N+](=O)[O-])cc1	(E)-N-{4-[3-(3,4-Dimethoxyphenyl)acryloyl]phenyl}-2-nitrobenzamide	Kraege_2016	IC50 (uM)	2.98	1
650	O(C)c1cc(ccc1OC)\C=C\C(=O)c1ccc(NC(=O)c2cc([N+](=O)[O-])ccc2)cc1	(E)-N-{4-[3-(3,4-Dimethoxyphenyl)acryloyl]phenyl}-3-nitrobenzamide	Kraege_2016	IC50 (uM)	2.82	1
651	Brc1cc(ccc1)C(=O)Nc1ccc(cc1)C(=O)\C=C\c1cc(OC)c(OC)cc1	(E)-3-Bromo-N-{4-[3-(3,4-dimethoxyphenyl)acryloyl]phenyl}benzamide	Kraege_2016	IC50 (uM)	1.74	1
652	Brc1ccc(cc1)C(=O)Nc1ccc(cc1)C(=O)\C=C\c1cc(OC)c(OC)cc1	(E)-4-Bromo-N-{4-[3-(3,4-dimethoxyphenyl)acryloyl]phenyl}benzamide	Kraege_2016	IC50 (uM)	2.94	1
653	Clc1cc(ccc1)C(=O)Nc1ccc(cc1)C(=O)\C=C\c1cc(OC)c(OC)cc1	(E)-3-Chloro-N-{4-[3-(3,4-dimethoxyphenyl)acryloyl]phenyl}benzamide	Kraege_2016	IC50 (uM)	2.39	1
654	Clc1ccc(cc1)C(=O)Nc1ccc(cc1)C(=O)\C=C\c1cc(OC)c(OC)cc1	(E)-4-Chloro-N-{4-[3-(3,4-dimethoxyphenyl)acryloyl]phenyl}benzamide	Kraege_2016	IC50 (uM)	1.87	1
655	Clc1cc(ccc1Cl)C(=O)Nc1ccc(cc1)C(=O)\C=C\c1cc(OC)c(OC)cc1	(E)-3,4-Dichloro-N-{4-[3-(3,4-dimethoxyphenyl)acryloyl]phenyl}-benzamide	Kraege_2016	IC50 (uM)	2.95	1
656	Fc1ccccc1C(=O)Nc1ccc(cc1)C(=O)\C=C\c1cc(OC)c(OC)cc1	(E)-N-{4-[3-(3,4-Dimethoxyphenyl)acryloyl]phenyl}-2-fluorobenzamide	Kraege_2016	IC50 (uM)	4.93	1
657	O(C)c1cc(ccc1OC)\C=C\C(=O)c1ccc(NC(=O)c2ccc(cc2)C#N)cc1	(E)-4-Cyano-N-{4-[3-(3,4-dimethoxyphenyl)acryloyl]phenyl}benzamide	Kraege_2016	IC50 (uM)	2.8	1
658	O(C)c1ccccc1C(=O)Nc1ccc(cc1)C(=O)\C=C\c1cc(OC)c(OC)cc1	(E)-N-{4-[3-(3,4-Dimethoxyphenyl)acryloyl]phenyl}-2-methoxy-benzamide	Kraege_2016	IC50 (uM)	2.48	1
659	O(C)c1cc(ccc1OC)\C=C\C(=O)c1ccc(NC(=O)c2cc(OC)ccc2)cc1	(E)-N-{4-[3-(3,4-Dimethoxyphenyl)acryloyl]phenyl}-3-methoxy-benzamide	Kraege_2016	IC50 (uM)	2.18	1
660	O(C)c1cc(ccc1OC)\C=C\C(=O)c1ccc(NC(=O)c2ccc(OC)cc2)cc1	(E)-N-{4-[3-(3,4-Dimethoxyphenyl)acryloyl]phenyl}-4-methoxy-benzamide	Kraege_2016	IC50 (uM)	6.61	1
661	O(C)c1cc(ccc1OC)C(=O)Nc1ccc(cc1)C(=O)\C=C\c1cc(OC)c(OC)cc1	(E)-N-{4-[3-(3,4-Dimethoxyphenyl)acryloyl]phenyl}-3,4-dimethox-ybenzamide	Kraege_2016	IC50 (uM)	3.15	1
662	O(C)c1c(OC)cc(cc1OC)C(=O)Nc1ccc(cc1)C(=O)\C=C\c1cc(OC)c(OC)cc1	(E)-N-{4-[3-(3,4-Dimethoxyphenyl)acryloyl]phenyl}-3,4,5-trimethoxybenzamide	Kraege_2016	IC50 (uM)	3.04	1
663	O(C)c1cc(ccc1OC)\C=C\C(=O)c1ccccc1NC(=O)c1ccccc1	(E)-N-{2-[3-(3,4-Dimethoxyphenyl)acryloyl]phenyl}benzamide	Kraege_2016	IC50 (uM)	0.982	1
664	Clc1cc(ccc1)C(=O)Nc1ccccc1C(=O)\C=C\c1cc(OC)c(OC)cc1	(E)-3-Chloro-N-{2-[3-(3,4-dimethoxyphenyl)acryloyl]phenyl}benzamide	Kraege_2016	IC50 (uM)	0.767	1
665	Clc1ccc(cc1)C(=O)Nc1ccccc1C(=O)\C=C\c1cc(OC)c(OC)cc1	(E)-4-Chloro-N-{2-[3-(3,4-dimethoxyphenyl)acryloyl]phenyl}benzamide	Kraege_2016	IC50 (uM)	1.86	1
666	O(C)c1ccccc1C(=O)Nc1ccccc1C(=O)\C=C\c1cc(OC)c(OC)cc1	(E)-N-{2-[3-(3,4-Dimethoxyphenyl)acryloyl]phenyl}-2-methoxy-benzamide	Kraege_2016	IC50 (uM)	1.23	1
667	O(C)c1cc(ccc1OC)\C=C\C(=O)c1ccccc1NC(=O)c1cc(OC)ccc1	(E)-N-{2-[3-(3,4-Dimethoxyphenyl)acryloyl]phenyl}-3-methoxy-benzamide	Kraege_2016	IC50 (uM)	1.12	1
668	O(C)c1cc(ccc1OC)\C=C\C(=O)c1ccccc1NC(=O)c1cc2c(nc1)cccc2	(E)-N-{2-[3-(3,4-Dimethoxyphenyl)acryloyl]phenyl}quinoline-3-carboxamide	Kraege_2016	IC50 (uM)	0.971	1
669	O(C)c1cc(ccc1OC)\C=C\C(=O)c1ccccc1NC(=O)c1c2c(ccc1)cccc2	(E)-N-{2-[3-(3,4-Dimethoxyphenyl)acryloyl]phenyl}-1-naphthamide	Kraege_2016	IC50 (uM)	1.08	1
670	O(C)c1cc(ccc1OC)\C=C\C(=O)c1ccccc1NC(=O)c1cccnc1	(E)-N-{2-[3-(3,4-Dimethoxyphenyl)acryloyl]phenyl}nicotinamide	Kraege_2016	IC50 (uM)	2.01	1
671	s1cccc1C(=O)Nc1ccccc1C(=O)\C=C\c1cc(OC)c(OC)cc1	(E)-N-{2-[3-(3,4-Dimethoxyphenyl)acryloyl]phenyl}thiophene-2-carboxamide	Kraege_2016	IC50 (uM)	0.6	1
672	Clc1cc(ccc1)\C=C\C(=O)c1ccccc1NC(=O)c1cc(OC)c(OC)cc1	(E)-N-{2-[3-(3-Chlorophenyl)acryloyl]phenyl}-3,4-dimethoxybenzamide	Kraege_2016	IC50 (uM)	3.32	1
673	s1cccc1C(=O)Nc1ccccc1C(=O)\C=C\c1cc(OC)c(F)cc1	(E)-N-{2-[3-(4-Fluoro-3-methoxyphenyl)acryloyl]phenyl}thiophene-2-carboxamide	Kraege_2016	IC50 (uM)	3.37	1
674	O(C)c1cc(ccc1OC)\C=C\C(=O)c1ccc(OC)cc1NC(=O)c1ccccc1	(E)-N-(2-(3-(3,4-dimethoxyphenyl)acryloyl)-5-methoxyphenyl)-benzamide	Kraege_2016_2	IC50 (uM)	0.219	1
675	Clc1ccccc1C(=O)Nc1cc(OC)ccc1C(=O)\C=C\c1cc(OC)c(OC)cc1	(E)-2-chloro-N-(2-(3-(3,4-dimethoxyphenyl)acryloyl)-5-methoxy-phenyl)-benzamide	Kraege_2016_2	IC50 (uM)	0.66	1
676	O(C)c1ccccc1C(=O)Nc1cc(OC)ccc1C(=O)\C=C\c1cc(OC)c(OC)cc1	(E)-N-(2-(3-(3,4-dimethoxyphenyl)acryloyl)-5-methoxyphenyl)-2-methoxybenzamide	Kraege_2016_2	IC50 (uM)	0.285	1
677	O(C)c1cc(ccc1OC)\C=C\C(=O)c1ccc(OC)cc1NC(=O)c1cccnc1	(E)-N-(2-(3-(3,4-dimethoxyphenyl)acryloyl)-5-methoxyphenyl)nicotinamide	Kraege_2016_2	IC50 (uM)	1.17	1
678	O(C)c1cc(ccc1OC)\C=C\C(=O)c1ccc(OC)cc1NC(=O)c1ncccc1	(E)-N-(2-(3-(3,4-dimethoxyphenyl)acryloyl)-5-methoxyphenyl)picolinamide	Kraege_2016_2	IC50 (uM)	1.36	1
679	O(C)c1cc(ccc1OC)\C=C\C(=O)c1ccc(OC)cc1NC(=O)c1c2c(ccc1)cccc2	(E)-N-(2-(3-(3,4-dimethoxyphenyl)acryloyl)-5-methoxyphenyl)-1-naphthamide	Kraege_2016_2	IC50 (uM)	0.422	1
680	s1cccc1C(=O)Nc1cc(OC)ccc1C(=O)\C=C\c1cc(OC)c(OC)cc1	(E)-N-(2-(3-(3,4-dimethoxyphenyl)acryloyl)-5-methoxyphenyl)thiophene-2-carboxamide	Kraege_2016_2	IC50 (uM)	0.32	1
681	o1cccc1C(=O)Nc1cc(OC)ccc1C(=O)\C=C\c1cc(OC)c(OC)cc1	(E)-N-(2-(3-(3,4-dimethoxyphenyl)acryloyl)-5-methoxyphenyl)furan-2-carboxamide	Kraege_2016_2	IC50 (uM)	0.714	1
682	s1ccnc1C(=O)Nc1cc(OC)ccc1C(=O)\C=C\c1cc(OC)c(OC)cc1	(E)-N-(2-(3-(3,4-dimethoxyphenyl)acryloyl)-5-methoxyphenyl)thiazole-2-carboxamide	Kraege_2016_2	IC50 (uM)	1.01	1
683	O(C)c1cc(cc(OC)c1)\C=C\C(=O)c1ccc(OC)cc1NC(=O)c1ccccc1	(E)-N-(2-(3-(3,5-dimethoxyphenyl)acryloyl)-5-methoxyphenyl)-benzamide	Kraege_2016_2	IC50 (uM)	0.292	1
684	O(C)c1ccccc1C(=O)Nc1cc(OC)ccc1C(=O)\C=C\c1cc(OC)cc(OC)c1	(E)-N-(2-(3-(3,5-dimethoxyphenyl)acryloyl)-5-methoxyphenyl)-2-methoxybenzamide	Kraege_2016_2	IC50 (uM)	0.595	1
685	Clc1ccccc1C(=O)Nc1cc(OC)ccc1C(=O)\C=C\c1cc(OC)cc(OC)c1	(E)-2-chloro-N-(2-(3-(3,5-dimethoxyphenyl)acryloyl)-5-methoxy-phenyl)benzamide	Kraege_2016_2	IC50 (uM)	0.358	1
686	s1cccc1C(=O)Nc1cc(OC)ccc1C(=O)\C=C\c1cc(OC)cc(OC)c1	(E)-N-(2-(3-(3,5-dimethoxyphenyl)acryloyl)-5-methoxyphenyl)thiophene-2-carboxamide	Kraege_2016_2	IC50 (uM)	0.268	1
687	O(C)c1cc(cc(OC)c1)\C=C\C(=O)c1ccc(OC)cc1NC(=O)c1c2c(ccc1)cccc2	(E)-N-(2-(3-(3,5-dimethoxyphenyl)acryloyl)-5-methoxyphenyl)-1-naphthamide	Kraege_2016_2	IC50 (uM)	0.359	1
688	O(C)c1cc(C(=O)\C=C\c2cc(OC)c(OC)cc2)c(NC(=O)c2ccccc2)cc1OC	(E)-N-(2-(3-(3,4-dimethoxyphenyl)acryloyl)-4,5-dimethoxyphenyl)benzamide	Kraege_2016_2	IC50 (uM)	0.754	1
689	O(C)c1ccccc1C(=O)Nc1cc(OC)c(OC)cc1C(=O)\C=C\c1cc(OC)c(OC)cc1	(E)-N-(2-(3-(3,4-dimethoxyphenyl)acryloyl)-4,5-dimethoxyphenyl)-2-methoxybenzamide	Kraege_2016_2	IC50 (uM)	0.832	1
690	O(C(=O)c1ccccc1)c1cc(OC)ccc1C(=O)\C=C\c1cc(OC)c(OC)cc1	(E)-2-(3-(3,4-dimethoxyphenyl)acryloyl)-5-methoxyphenyl benzoate	Kraege_2016_2	IC50 (uM)	0.879	1
691	s1cccc1C(Oc1cc(OC)ccc1C(=O)\C=C\c1cc(OC)c(OC)cc1)=O	(E)-2-(3-(3,4-dimethoxyphenyl)acryloyl)-5-methoxyphenyl thiophene-2-carboxylate	Kraege_2016_2	IC50 (uM)	2.08	1
692	O(C(=O)c1ccccc1OC)c1cc(OC)ccc1C(=O)\C=C\c1cc(OC)c(OC)cc1	(E)-2-(3-(3,4-dimethoxyphenyl)acryloyl)-5-methoxyphenyl 2-methoxybenzoate	Kraege_2016_2	IC50 (uM)	1.44	1
693	O(C(=O)c1ccccc1)c1cc(OC)ccc1C(=O)\C=C\c1cc(OC)cc(OC)c1	(E)-2-(3-(3,5-dimethoxyphenyl)acryloyl)-5-methoxyphenyl benzoate	Kraege_2016_2	IC50 (uM)	1.09	1
694	s1cccc1C(Oc1cc(OC)ccc1C(=O)\C=C\c1cc(OC)cc(OC)c1)=O	(E)-2-(3-(3,5-dimethoxyphenyl)acryloyl)-5-methoxyphenyl thiophene-2-carboxylate	Kraege_2016_2	IC50 (uM)	0.865	1
695	O(C(=O)c1ccccc1OC)c1cc(OC)ccc1C(=O)\C=C\c1cc(OC)cc(OC)c1	(E)-2-(3-(3,5-dimethoxyphenyl)acryloyl)-5-methoxyphenyl 2-methoxybenzoate	Kraege_2016_2	IC50 (uM)	1.7	1
696	O(C)c1cc(ccc1OC)\C=C\C(=O)c1cc(Nc2ncnc3c2cccc3)ccc1	(E)-3-(3,4-dimethoxyphenyl)-1-(3-(quinazolin-4-ylamino) phenyl)prop-2-en-1-one	Kraege_2016_3	IC50 (uM)	1.3	1
697	O(C)c1ccc(cc1)\C=C\C(=O)c1cc(Nc2ncnc3c2cccc3)ccc1	(E)-3-(4-methoxyphenyl)-1-(3-(quinazolin-4-ylamino) phenyl)prop-2-en-1-one	Kraege_2016_3	IC50 (uM)	0.89	1
698	O(C)c1cc(ccc1OC)\C=C\C(=O)c1cc(Nc2ncnc3c2cc(OC)c(OC)c3)ccc1	(E)-3-(3,4-dimethoxyphenyl)-1-(3-((6,7-dimethoxyquinazolin-4-yl)amino)phenyl) prop-2-en-1-one	Kraege_2016_3	IC50 (uM)	1.71	1
699	O(C)c1cc2c(ncnc2Nc2cc(ccc2)C(=O)\C=C\c2ccc(OC)cc2)cc1OC	(E)-1-(3-((6,7-dimethoxyquinazolin-4-yl)amino)phenyl)-3-(4-methoxyphenyl)prop-2-en-1-one	Kraege_2016_3	IC50 (uM)	0.32	1
700	O(C)c1cc(ccc1OC)\C=C\C(=O)c1cc(Nc2nc(nc3c2cccc3)-c2ccccc2)ccc1	(E)-3-(3,4-dimethoxyphenyl)-1-(3-((2-phenylquinazolin-4-yl)amino)phenyl)prop-2-en-1-one	Kraege_2016_3	IC50 (uM)	0.46	1
701	O(C)c1ccc(cc1)\C=C\C(=O)c1cc(Nc2nc(nc3c2cccc3)-c2ccccc2)ccc1	(E)-3-(4-methoxyphenyl)-1-(3-((2-phenylquinazolin-4-yl) amino)phenyl)prop-2-en-1-one	Kraege_2016_3	IC50 (uM)	0.97	1
702	O(C)c1cc(ccc1)\C=C\C(=O)c1cc(Nc2nc(nc3c2cccc3)-c2ccccc2)ccc1	(E)-3-(3-methoxyphenyl)-1-(3-((2-phenylquinazolin-4-yl) amino)phenyl)prop-2-en-1-one	Kraege_2016_3	IC50 (uM)	0.68	1
703	O(C)c1cc(ccc1OC)-c1nc(Nc2cc(ccc2)C(=O)\C=C\c2cc(OC)c(OC)cc2)c2c(n1)cccc2	(E)-3-(3,4-dimethoxyphenyl)-1-(3-((2-(3,4-dimethoxyphenyl)quinazolin-4-yl)amino)phenyl)prop-2-en-1-one	Kraege_2016_3	IC50 (uM)	0.6	1
704	O(C)c1cc(ccc1OC)-c1nc(Nc2cc(ccc2)C(=O)\C=C\c2ccc(OC)cc2)c2c(n1)cccc2	(E)-1-(3-((2-(3,4-dimethoxyphenyl)quinazolin-4-yl)amino) phenyl)-3-(4-methoxy phenyl)prop-2-en-1-one	Kraege_2016_3	IC50 (uM)	0.21	1
705	O(C)c1cc(ccc1OC)-c1nc(Nc2cc(ccc2)C(=O)\C=C\c2cc(OC)ccc2)c2c(n1)cccc2	(E)-1-(3-((2-(3,4-dimethoxyphenyl)quinazolin-4-yl)amino) phenyl)-3-(3-methoxyphenyl)prop-2-en-1-one	Kraege_2016_3	IC50 (uM)	0.31	1
706	O(C)c1cc(ccc1OC)\C=C\C(=O)c1ccc(Nc2ncnc3c2cccc3)cc1	(E)-3-(3,4-dimethoxyphenyl)-1-(4-(quinazolin-4-ylamino) phenyl)prop-2-en-1-one	Kraege_2016_3	IC50 (uM)	0.84	1
707	O(C)c1cc(ccc1)\C=C\C(=O)c1ccc(Nc2ncnc3c2cccc3)cc1	(E)-3-(3-methoxyphenyl)-1-(4-(quinazolin-4-ylamino) phenyl)prop-2-en-1-one	Kraege_2016_3	IC50 (uM)	0.68	1
708	O(C)c1cc(ccc1OC)\C=C\C(=O)c1ccc(Nc2ncnc3c2cc(OC)c(OC)c3)cc1	(E)-3-(3,4-dimethoxyphenyl)-1-(4-((6,7-dimethoxyquinazolin-4-yl)amino)phenyl) prop-2-en-1-one	Kraege_2016_3	IC50 (uM)	1.23	1
709	O(C)c1cc2c(ncnc2Nc2ccc(cc2)C(=O)\C=C\c2cc(OC)ccc2)cc1OC	(E)-1-(4-((6,7-dimethoxyquinazolin-4-yl)amino)phenyl)-3-(3-methoxy phenyl) prop-2-en-1-one	Kraege_2016_3	IC50 (uM)	0.39	1
710	O(C)c1cc(ccc1OC)\C=C\C(=O)c1ccc(Nc2nc(nc3c2cccc3)-c2ccccc2)cc1	(E)-3-(3,4-dimethoxyphenyl)-1-(4-((2-phenylquinazolin-4-yl)amino)phenyl)prop-2-en-1-one	Kraege_2016_3	IC50 (uM)	0.29	1
711	O(C)c1cc(ccc1)\C=C\C(=O)c1ccc(Nc2nc(nc3c2cccc3)-c2ccccc2)cc1	(E)-3-(3-methoxyphenyl)-1-(4-((2-phenylquinazolin-4-yl) amino)phenyl)prop-2-en-1-one	Kraege_2016_3	IC50 (uM)	0.88	1
712	O(C)c1ccc(cc1)\C=C\C(=O)c1ccc(Nc2nc(nc3c2cccc3)-c2ccccc2)cc1	(E)-3-(4-methoxyphenyl)-1-(4-((2-phenylquinazolin-4-yl) amino)phenyl)prop-2-en-1-one	Kraege_2016_3	IC50 (uM)	3.55	1
713	O=C(\C=C\c1ccccc1)c1ccc(Nc2nc(nc3c2cccc3)-c2ccccc2)cc1	(E)-3-phenyl-1-(4-((2-phenylquinazolin-4-yl)amino)phenyl)prop-2-en-1-one	Kraege_2016_3	IC50 (uM)	0.92	1
714	O(C)c1cc(ccc1OC)-c1nc(Nc2ccc(cc2)C(=O)\C=C\c2cc(OC)c(OC)cc2)c2c(n1)cccc2	(E)-3-(3,4-dimethoxyphenyl)-1-(4-((2-(3,4-dimethoxyphenyl)quinazolin-4-yl) amino)phenyl)prop-2-en-1-one	Kraege_2016_3	IC50 (uM)	0.19	1
715	O(C)c1cc(ccc1OC)-c1nc(Nc2ccc(cc2)C(=O)\C=C\c2cc(OC)ccc2)c2c(n1)cccc2	(E)-1-(4-((2-(3,4-dimethoxyphenyl)quinazolin-4-yl)amino)phenyl)-3-(3-methoxy phenyl)prop-2-en-1-one	Kraege_2016_3	IC50 (uM)	0.36	1
716	O(C)c1cc(ccc1OC)-c1nc(Nc2ccc(cc2)C(=O)\C=C\c2ccc(OC)cc2)c2c(n1)cccc2	(E)-1-(4-((2-(3,4-dimethoxyphenyl)quinazolin-4-yl)amino)phenyl)-3-(4-methoxyphenyl)prop-2-en-1-one	Kraege_2016_3	IC50 (uM)	3.13	1
717	O(C)c1cc(ccc1OC)-c1nc(Nc2ccc(cc2)C(=O)\C=C\c2ccccc2)c2c(n1)cccc2	(E)-1-(4-((2-(3,4-dimethoxyphenyl)quinazolin-4-yl)amino)phenyl)-3-phenylprop-2-en-1-one	Kraege_2016_3	IC50 (uM)	1.09	1
718	Clc1ccc(-n2nc(nn2)-c2ccccc2NC(=O)c2ccc(OC)cc2)cc1	N-(2-(2-(4-chlorophenyl)-2H-tetrazol-5-yl)phenyl)-4-methoxybenzamide	Koehler_2016	IC50 (uM)	0.223	1
719	O(C)c1ccc(cc1)C(=O)Nc1ccccc1-c1nn(nn1)-c1ccc(cc1)C(C)C	N-(2-(2-(4-isopropylphenyl)-2H-tetrazol-5-yl)phenyl)-4-methoxybenzamide	Koehler_2016	IC50 (uM)	0.136	1
720	O(C)c1ccc(-n2nc(nn2)-c2ccccc2NC(=O)c2cc([N+](=O)[O-])ccc2)cc1	N-(2-(2-(4-methoxyphenyl)-2H-tetrazol-5-yl)phenyl)-3-nitro-benzamide	Koehler_2016	IC50 (uM)	0.168	1
721	O(C)c1ccc(-n2nc(nn2)-c2ccccc2NC(=O)c2ccccc2[N+](=O)[O-])cc1	N-(2-(2-(4-methoxyphenyl)-2H-tetrazol-5-yl)phenyl)-2-nitro-benzamide	Koehler_2016	IC50 (uM)	0.226	1
722	O(C)c1ccc(cc1)C(=O)Nc1ccccc1-c1nn(nn1)-c1ccc(OC)cc1	4-methoxy-N-(2-(2-(4-methoxyphenyl)-2H-tetrazol-5-yl) phenyl)benzamide	Koehler_2016	IC50 (uM)	0.199	1
723	FC(F)(F)c1ccc(cc1)C(=O)Nc1ccccc1-c1nn(nn1)-c1cc(OC)c(OC)cc1	N-(2-(2-(3,4-dimethoxyphenyl)-2H-tetrazol-5-yl)phenyl)-4-(trifluoromethyl)benzamide	Koehler_2016	IC50 (uM)	0.33	1
724	O(C)c1cc(-n2nc(nn2)-c2ccccc2NC(=O)c2ccc(OC)cc2)ccc1OC	N-(2-(2-(3,4-dimethoxyphenyl)-2H-tetrazol-5-yl)phenyl)-4-methoxybenzamide	Koehler_2016	IC50 (uM)	0.319	1
725	O(C)c1cc(-n2nc(nn2)-c2ccccc2NC(=O)c2ccccc2)ccc1OC	N-(2-(2-(3,4-dimethoxyphenyl)-2H-tetrazol-5-yl)phenyl)benzamide	Koehler_2016	IC50 (uM)	0.23	1
726	S(C)c1ccc(-n2nc(nn2)-c2ccccc2NC(=O)c2ccccc2[N+](=O)[O-])cc1	N-(2-(2-(4-(methylthio)phenyl)-2H-tetrazol-5-yl)phenyl)-2-nitro-benzamide	Koehler_2016	IC50 (uM)	0.221	1
727	S(C)c1ccc(-n2nc(nn2)-c2ccccc2NC(=O)c2ccc(OC)cc2)cc1	4-methoxy-N-(2-(2-(4-(methylthio)phenyl)-2H-tetrazol-5-yl)phenyl)benzamide	Koehler_2016	IC50 (uM)	0.132	1
728	S(C)c1ccc(-n2nc(nn2)-c2ccccc2NC(=O)c2ccc(cc2)CCC)cc1	N-(2-(2-(4-(methylthio)phenyl)-2H-tetrazol-5-yl)phenyl)-4-propylbenzamide	Koehler_2016	IC50 (uM)	0.783	1
729	O(CC)c1ccc(-n2nc(nn2)-c2ccccc2NC(=O)c2ccccc2[N+](=O)[O-])cc1	N-(2-(2-(4-ethoxyphenyl)-2H-tetrazol-5-yl)phenyl)-2-nitrobenzamide	Koehler_2016	IC50 (uM)	0.308	1
730	O(CC)c1ccc(-n2nc(nn2)-c2ccccc2NC(=O)c2ccc(OC)cc2)cc1	N-(2-(2-(4-ethoxyphenyl)-2H-tetrazol-5-yl)phenyl)-4-methoxybenzamide	Koehler_2016	IC50 (uM)	0.793	1
731	Oc1ccc(-n2nc(nn2)-c2ccccc2NC(=O)c2ccc(cc2)CCC)cc1	N-(2-(2-(4-Hydroxyphenyl)-2H-tetrazol-5-yl)phenyl)-4-propyl-benzamide	Koehler_2016	IC50 (uM)	0.204	1
732	O(C)c1cc(ccc1OC)C(=O)Nc1ccccc1-c1nn(nn1)-c1ccccc1	3,4-dimethoxy-N-(2-(2-phenyl-2H-tetrazol-5-yl)phenyl)benzamide	Koehler_2016	IC50 (uM)	0.832	1
733	FC(F)(F)c1ccc(cc1)C(=O)Nc1ccccc1-c1nn(nn1)-c1ccccc1	N-(2-(2-phenyl-2H-tetrazol-5-yl)phenyl)-4-(trifluoromethyl)benzamide	Koehler_2016	IC50 (uM)	4.39	1
734	O=C(Nc1ccccc1-c1nn(nn1)-c1ccccc1)c1ccc([N+](=O)[O-])cc1	4-nitro-N-(2-(2-phenyl-2H-tetrazol-5-yl)phenyl)-benzamide	Koehler_2016	IC50 (uM)	0.15	1
735	O=C(Nc1ccccc1-c1nn(nn1)-c1ccccc1)c1cc([N+](=O)[O-])ccc1	3-nitro-N-(2-(2-phenyl-2H-tetrazol-5-yl)phenyl)-benzamide	Koehler_2016	IC50 (uM)	0.127	1
736	O=C(Nc1ccccc1-c1nn(nn1)-c1ccccc1)c1ccccc1[N+](=O)[O-]	2-nitro-N-(2-(2-phenyl-2H-tetrazol-5-yl)phenyl)-benzamide	Koehler_2016	IC50 (uM)	0.28	1
737	O(C)c1ccc(cc1)C(=O)Nc1ccccc1-c1nn(nn1)-c1ccccc1	4-methoxy-N-(2-(2-phenyl-2H-tetrazol-5-yl)phenyl)benzamide	Koehler_2016	IC50 (uM)	0.2	1
738	O=C(Nc1ccccc1-c1nn(nn1)-c1ccccc1)c1ccc(cc1)CCC	N-(2-(2-phenyl-2H-tetrazol-5-yl)phenyl)-4-propylbenzamide	Koehler_2016	IC50 (uM)	0.212	1
739	FC(F)(F)c1cc(NC(=O)c2cc(Nc3nc(ccn3)-c3cccnc3)c(cc2)C)cc(-n2cc(nc2)C)c1	nilotinib nilotinib	Karthikeyan_2016 D'Cunha_2016	Luminiscence unit IC50 (uM)	30000 2.5	1
740	O=C1n2nc3nc4c(cc3c2NC(=C1)C)cccc4	IND-1	Karthikeyan_2016	Luminiscence unit	5000	0
741	n12nc3nc4c(cc3c1N=C(C=C2N(C)C)C)cccc4	IND-3	Karthikeyan_2016	Luminiscence unit	5000	0
742	O1CCN(CC1)C=1n2nc3nc4c(cc3c2N=C(C=1)C)cccc4	IND-4	Karthikeyan_2016	Luminiscence unit	5000	0
743	[NH+](CCNC=1n2nc3nc4c(cc3c2N=C(C=1)C)cccc4)(C)C	IND-5	Karthikeyan_2016	Luminiscence unit	10000	1
744	[NH+](CCNC=1n2nc3nc4c(cc3c2N=C(C=1)C)cccc4)(CC)CC	IND-6	Karthikeyan_2016	Luminiscence unit	25000	1
745	[NH+](CCCNC=1n2nc3nc4c(cc3c2N=C(C=1)C)cccc4)(C)C	IND-7	Karthikeyan_2016	Luminiscence unit	28000	1
746	[NH+](CCCNC=1n2nc3nc4c(cc3c2N=C(C=1)C)cccc4)(CC)CC	IND-8	Karthikeyan_2016	Luminiscence unit	37000	1
747	Oc1c2c3c(n(c2ccc1)Cc1ccccc1)-c1c(cccc1)C3=O	5-benzyl-9-hydroxyindeno[1,2-b]indol-10(5H)-one	Gozzi_2015	%inhibition at 10 uM	68	1
748	Oc1c2c3c(n(c2ccc1)CCc1ccccc1)-c1c(cccc1)C3=O	9-Hydroxy-5-(2-phenylethyl)-5H-indeno[1,2-b]indole-10-one	Gozzi_2015	IC50 (uM)	0.16	1
749	Oc1c2c3c(n(c2ccc1)CCCc1ccccc1)-c1c(cccc1)C3=O	9-Hydroxy-5-(3-phenylpropyl)-5H-indeno[1,2-b]indole-10-one	Gozzi_2015	IC50 (uM)	0.64	1
750	Oc1cc(cc2n(c-3c(c12)C(=O)c1c-3cccc1)Cc1ccccc1)-c1ccccc1	5-benzyl-9-hydroxy-7-phenylindeno[1,2-b]indol-10(5H)-one	Gozzi_2015	%inhibition at 10 uM	56	1
751	Oc1cc(cc2n(c-3c(c12)C(=O)c1c-3cccc1)CCc1ccccc1)C	9-Hydroxy-7-methyl-5-(2-phenylethyl)-5H-indeno[1,2-b]indole-10-one	Gozzi_2015	IC50 (uM)	0.16	1
752	Oc1cc(cc2n(c-3c(c12)C(=O)c1c-3cccc1)CCc1ccccc1)-c1ccccc1	9-Hydroxy-7-phenyl-5-(2-phenylethyl)-5H-indeno[1,2-b]indole-10-one	Gozzi_2015	IC50 (uM)	0.51	1
753	O(C)c1ccccc1CCn1c-2c(c3c1cccc3O)C(=O)c1c-2cccc1	9-Hydroxy-5-[2-(2-methoxyphenyl)ethyl]-5H-indeno[1,2-b]indole-10-one	Gozzi_2015	IC50 (uM)	0.15	1
754	O(C)c1cc(ccc1)CCn1c-2c(c3c1cccc3O)C(=O)c1c-2cccc1	9-Hydroxy-5-[2-(3-methoxyphenyl)ethyl]-5H-indeno[1,2-b]indole-10-one	Gozzi_2015	IC50 (uM)	0.37	1
755	O(C)c1ccc(cc1)CCn1c-2c(c3c1cccc3O)C(=O)c1c-2cccc1	9-Hydroxy-5-[2-(4-methoxyphenyl)ethyl]-5H-indeno[1,2-b]indole-10-one	Gozzi_2015	IC50 (uM)	0.2	1
756	O=C1C=CC(=O)c2n(c-3c(c12)C(=O)c1c-3cccc1)Cc1ccccc1	5-benzylindeno[1,2-b]indole-6,9,10(5H)-trione	Gozzi_2015	%inhibition at 10 uM	10	0
757	O=C1C=CC(=O)c2n(c-3c(c12)C(=O)c1c-3cccc1)CCc1ccccc1	5-(2-Phenylethyl)-5H-indeno[1,2-b]indole-6,9,10-trione	Gozzi_2015	%inhibition at 10 uM	18	0
758	O=C1c2n(c-3c(c2C(=O)C=C1C)C(=O)c1c-3cccc1)CCc1ccccc1	7-Methyl-5-(2-phenylethyl)-5H-indeno[1,2-b]indole-6,9,10-trione	Gozzi_2015	IC50 (uM)	0.84	1
759	O=C1c2n(c-3c(c2C(=O)C=C1c1ccccc1)C(=O)c1c-3cccc1)CCc1ccccc1	7-Phenyl-5-(2-phenylethyl)-5H-indeno[1,2-b]indole-6,9,10-trione	Gozzi_2015	IC50 (uM)	0.43	1
760	O=C1CCCc2n(c-3c(c12)C(=O)c1c-3cccc1)C(C)C	5-isopropyl-7,8-dihydroindeno[1,2-b]indole-9,10(5H,6H)-dione	Gozzi_2015_2	%inhibition at 10 uM	15	0
761	O=C1CCCc2n(c-3c(c12)C(=O)c1c-3cccc1)CCc1ccccc1	5-phenethyl-7,8-dihydroindeno[1,2-b]indole-9,10(5H,6H)-dione	Gozzi_2015_2	IC50 (uM)	0.43	1
762	O=C1CCCc2n(c-3c(c12)C(=O)c1c-3cccc1)CCCc1ccccc1	5-(3-phenylpropyl)-7,8-dihydroindeno[1,2-b]indole-9,10(5H,6H)-dione	Gozzi_2015_2	IC50 (uM)	0.79	1
763	O=C1CC(Cc2n(c-3c(c12)C(=O)c1c-3cccc1)C(C)C)C	5-isopropyl-7-methyl-7,8-dihydroindeno[1,2-b]indole-9,10(5H,6H)-dione	Gozzi_2015_2	IC50 (uM)	4.1	1
764	O=C1CC(Cc2n(c-3c(c12)C(=O)c1c-3cccc1)Cc1ccccc1)c1ccccc1	5-benzyl-7-phenyl-7,8-dihydroindeno[1,2-b]indole-9,10(5H,6H)-dione	Gozzi_2015_2	IC50 (uM)	0.96	1
765	O=C1CC(Cc2n(c-3c(c12)C(=O)c1c-3cccc1)CCc1ccccc1)C	7-methyl-5-phenethyl-7,8-dihydroindeno[1,2-b]indole-9,10(5H,6H)-dione	Gozzi_2015_2	IC50 (uM)	0.23	1
766	O=C1CC(Cc2n(c-3c(c12)C(=O)c1c-3cccc1)CCc1ccccc1)c1ccccc1	7-Phenyl-5-(2-phenylethyl)-5,6,7,8-tetrahydroindeno[1,2-b]-indole-9,10-dione	Gozzi_2015_2	IC50 (uM)	0.49	1
767	O(C)c1ccccc1CCn1c2c(c3c1-c1c(cccc1)C3=O)C(=O)CCC2	5-[2-(2-Methoxyphenyl)ethyl]-5,6,7,8-tetrahydroindeno[1,2-b]-indole-9,10-dione	Gozzi_2015_2	IC50 (uM)	0.21	1
768	O(C)c1cc(ccc1)CCn1c2c(c3c1-c1c(cccc1)C3=O)C(=O)CCC2	5-[2-(3-Methoxyphenyl)ethyl]-5,6,7,8-tetrahydroindeno[1,2-b]-indole-9,10-dione	Gozzi_2015_2	IC50 (uM)	0.31	1
769	O(C)c1ccc(cc1)CCn1c2c(c3c1-c1c(cccc1)C3=O)C(=O)CCC2	5-[2-(4-Methoxyphenyl)ethyl]-5,6,7,8-tetrahydroindeno[1,2-b]-indole-9,10-dione	Gozzi_2015_2	IC50 (uM)	0.7	1
770	O(C\C=C(\C)/C)c1c2c(-c3n(c4c(c3C2=O)C(=O)CCC4)C(C)C)ccc1	5- I sopropyl-1-(3-methylbut-2-enyloxy)-5,6,7,8-tetrahydroindeno[1,2-b]indole-9,10-dione	Gozzi_2015_2	IC50 (uM)	3	1
771	O(C\C=C(\C)/C)c1c-2c(ccc1)C(=O)c1c3c(n(c1-2)C(C)C)CCCC3=O	5- I sopropyl-4-(3-methylbut-2-enyloxy)-5,6,7,8-tetrahydroindeno[1,2-b]indole-9,10-dione	Gozzi_2015_2	IC50 (uM)	1.6	1
772	O=C1c2c3c(n(c2CCC1C)C(C)C)-c1c(cccc1)C3=O	5-Isopropyl-8-methyl-5,6,7,8-tetrahydroindeno[1,2-b]indole-9,10-dione	Gozzi_2015_2	IC50 (uM)	20	1
773	O=C1c2c3c(n(c2CCC1(Cc1ccccc1)Cc1ccccc1)C(C)C)-c1c(cccc1)C3=O	8,8-Dibenzyl-5-isopropyl-5,6,7,8-tetrahydroindeno[1,2-b]indole-9,10-dione	Gozzi_2015_2	IC50 (uM)	0.61	1
774	O(CC(=O)Nc1cc(ccc1O)C(OC)=O)c1ccc(cc1)C12CC3CC(C1)CC(C2)C3	lw6	Song_2016			1
775	O1c2c(C=CC1(C)C)c1OC[C@]3(O)[C@@H](Oc4cc(O)ccc34)c1cc2	Glyceollin	Schexnayder_2016	EC50 (uM)	26	1
776	Clc1ccc(cc1)C(=O)c1ccc(OC(C(OC(C)C)=O)(C)C)cc1	Fenofibrate Fenofibrate	Miyata_2016 Matsson_2007	IC50 (uM) reported by Montanari_2014	5.1 INHIBITOR	1
777	Fc1ccc(cc1)-c1n(CC[C@@H](O)C[C@@H](O)CC(=O)[O-])c(C(C)C)c(C(=O)Nc2ccccc2)c1-c1ccccc1	Atorvastatin	Miyata_2016	IC50 (uM)	4.3	1
778	O=C1N(C)C([C@H](O)[C@@H](C\C=C\C)C)C(=O)NC(CC)C(=O)N(CC(=O)N(C)C(CC(C)C)C(=O)NC(C(C)C)C(=O)N(C)C(CC(C)C)C(=O)NC(C)C(=O)NC(C)C(=O)N(C)C(CC(C)C)C(=O)N(C)C(CC(C)C)C(=O)N(C)C1C(C)C)C	Cyclosporine	Miyata_2016	IC50 (uM)	3.2	1
779	O1[C@H](/C(=C/[C@H]2C[C@@H](OC)[C@H](O)CC2)/C)[C@H](C)[C@@H](O)CC(=O)[C@H](\C=C(/C[C@@H](C[C@H](OC)[C@H]2O[C@](O)([C@@H](C[C@@H]2OC)C)C(=O)C(=O)N2[C@@H](CCCC2)C1=O)C)\C)CC=C	Tacrolimus tacrolimus	Miyata_2016 Saito_2006	IC50 (uM) reported by Montanari_2014	3.1 INHIBITOR	1
780	S(=O)(=O)(N(C)c1nc(-c2ccc(F)cc2)c(\C=C\[C@@H](O)C[C@@H](O)CC(=O)[O-])c(n1)C(C)C)C	Rosuvastatin	Miyata_2016	IC50 (uM)	2.3	1
781	Brc1cc(cc(Br)c1O)C(=O)c1c2c(oc1CC)cccc2	Benzbromarone Benzbromarone	Miyata_2016 Matsson_2009	IC50 (uM) reported by Montanari_2014	0.2 INHIBITOR	1
782	[nH]1nc(nc1-c1ccncc1)-c1cc(ncc1)C#N	Topiroxostat	Miyata_2016	IC50 (uM)	0.18	1
783	s1c(nc(C)c1C(=O)[O-])-c1cc(C#N)c(OCC(C)C)cc1	Febuxostat	Miyata_2016	IC50 (uM)	0.027	1
784	O=C(Nc1cc(Nc2nc(ccn2)-c2cccnc2)c(cc1)C)c1ccc(cc1)C[NH+]1CC[NH+](CC1)C	imatinib Imatinib mesylate	D'Cunha_2016 Matsson_2007	IC50 (uM) reported by Montanari_2014	0.94 INHIBITOR	1
785	O(CCOC)c1cc2c(ncnc2Nc2cc(ccc2)C#C)cc1OCCOC	erlotinib Erlotinib	D'Cunha_2016 Matsson_2007	IC50 (uM) reported by Montanari_2014	2.23 INHIBITOR	1
786	S(c1ccccc1C(=O)NC)c1cc2[nH]nc(c2cc1)\C=C\c1ncccc1	axitinib	D'Cunha_2016	IC50 (uM)	6.89	1
787	O(C)c1ccc(OC)cc1\C=C\1/CCC\C(=C/c2cc(OC)ccc2OC)\C/1=O	1811454	Revalde_2015	IC50 (uM)	1.2	1
788	O(C)c1cc(ccc1O)\C=C\1/CCC\C(=C/c2cc(OC)c(O)cc2)\C/1=O	1550234	Revalde_2015	IC50 (uM)	4.3	1
789	Fc1cc(OC)c(OC)cc1\C=C\1/C[NH+](C\C(=C/c2cc(OC)c(OC)cc2F)\C/1=O)C	49866299	Revalde_2015	IC50 (uM)	5.2	1
790	Fc1cc2c(N=C3N([C@H](C)C(=O)N4[C@@H]5N(c6c(cccc6)[C@@]5(C[C@@H]34)C(C=C)(C)C)C(=O)C)C2=O)cc1	312381836	Hayashi_2015	pubmed_outcome	Active	1
791	Clc1cc2c(N=C3N([C@H](C)C(=O)N4[C@@H]5N(c6c(cccc6)[C@@]5(C[C@@H]34)C(C=C)(C)C)C(=O)C)C2=O)cc1	312381837	Hayashi_2015	pubmed_outcome	Active	1
792	Brc1cc2c(N=C3N([C@H](C)C(=O)N4[C@@H]5N(c6c(cccc6)[C@@]5(C[C@@H]34)C(C=C)(C)C)C(=O)C)C2=O)cc1	312381838	Hayashi_2015	pubmed_outcome	Active	1
793	Brc1cc2N=C3N([C@H](C)C(=O)N4[C@@H]5N(c6c(cccc6)[C@@]5(C[C@@H]34)C(C=C)(C)C)C(=O)C)C(=O)c2cc1	312381839	Hayashi_2015	pubmed_outcome	Active	1
794	Ic1cc2c(N=C3N([C@H](C)C(=O)N4[C@@H]5N(c6c(cccc6)[C@@]5(C[C@@H]34)C(C=C)(C)C)C(=O)C)C2=O)cc1	312381840	Hayashi_2015	pubmed_outcome	Active	1
795	O(C)c1cc2c(N=C3N([C@H](C)C(=O)N4[C@@H]5N(c6c(cccc6)[C@@]5(C[C@@H]34)C(C=C)(C)C)C(=O)C)C2=O)cc1	312381841	Hayashi_2015	pubmed_outcome	Active	1
796	O=C1N2[C@@H]3N(c4c(cccc4)[C@@]3(C[C@H]2C=2N([C@@H]1C)C(=O)c1cc(ccc1N=2)C#N)C(C=C)(C)C)C(=O)C	312381842	Hayashi_2015	pubmed_outcome	Active	1
797	O=C1N2[C@@H]3N(c4c(cccc4)[C@@]3(C[C@H]2C=2N([C@@H]1C)C(=O)c1cc(ccc1N=2)-c1ccccc1)C(C=C)(C)C)C(=O)C	312381843	Hayashi_2015	pubmed_outcome	Active	1
798	Brc1cc2c(N([C@H]3N4[C@@H](C[C@@]23C(C=C)(C)C)C=2N([C@H](C)C4=O)C(=O)c3c(N=2)cccc3)C(=O)C)cc1	312381844	Hayashi_2015	pubmed_outcome	Active	1
799	O=C1N2[C@@H]3N(c4c(cc(cc4)C4CCCCC4)[C@@]3(C[C@H]2C=2N([C@@H]1C)C(=O)c1c(N=2)cccc1)C(C=C)(C)C)C(=O)C	312381845	Hayashi_2015	pubmed_outcome	Active	1
800	O=C1N2[C@@H]3N(c4c(cc(cc4)-c4ccccc4)[C@@]3(C[C@H]2C=2N([C@@H]1C)C(=O)c1c(N=2)cccc1)C(C=C)(C)C)C(=O)C	312381846	Hayashi_2015	pubmed_outcome	Active	1
801	O=C1N2[C@@H]3N(c4c(cc(cc4)-c4ccc(cc4)C)[C@@]3(C[C@H]2C=2N([C@@H]1C)C(=O)c1c(N=2)cccc1)C(C=C)(C)C)C(=O)C	312381847	Hayashi_2015	pubmed_outcome	Active	1
802	O(C)c1ccc(cc1)-c1cc2c(N([C@H]3N4[C@@H](C[C@@]23C(C=C)(C)C)C=2N([C@H](C)C4=O)C(=O)c3c(N=2)cccc3)C(=O)C)cc1	312381848	Hayashi_2015	pubmed_outcome	Active	1
803	O=C1N2[C@@H]3N(c4c(cc(cc4)-c4ccc(cc4)C#N)[C@@]3(C[C@H]2C=2N([C@@H]1C)C(=O)c1c(N=2)cccc1)C(C=C)(C)C)C(=O)C	312381849	Hayashi_2015	pubmed_outcome	Active	1
804	O=C1N2[C@@H]3N(c4c(cc(cc4)-c4ccc(cc4)-c4ccccc4)[C@@]3(C[C@H]2C=2N([C@@H]1C)C(=O)c1c(N=2)cccc1)C(C=C)(C)C)C(=O)C	312381850	Hayashi_2015	pubmed_outcome	Active	1
805	O1c2c(C=CC1=O)c(OC\C=C(\CC\C=C(\C)/C)/C)c1c(occ1)c2	bergamottin	Fleisher_2015	IC50 (uM)	3.19	1
806	O1c2c(C=CC1=O)c(OC\C=C(\CCC(O)C(O)(C)C)/C)c1c(occ1)c2	6',7'-Dihydroxybergamottin	Fleisher_2015	IC50 (uM)	5.2	1
807	O1c2c(c(OC)c(OC)c(OC)c2OC)C(=O)C=C1c1cc(OC)c(OC)cc1	nobiletin Nobiletin	Fleisher_2015 Pick_2011	IC50 (uM) reported by Montanari_2014	1.04 INHIBITOR	1
808	O1c2c(OC1)c-1c(cc2OC)C[NH+](Cc2cc(OC)c3OCOc3c-12)CC	4a	Gu_2014	mitoxantrone accumulation (%)	120	0
809	O1c2c(OC1)c-1c(cc2OC)C[NH+](Cc2cc(OC)c3OCOc3c-12)CCCC	4b	Gu_2014	mitoxantrone accumulation (%)	150	0
810	O1c2c(OC1)c-1c(cc2OC)C[NH+](Cc2cc(OC)c3OCOc3c-12)CC(OC)=O	4c	Gu_2014	mitoxantrone accumulation (%)	140	0
811	O1c2c(OC1)c-1c(cc2OC)C[NH+](Cc2cc(OC)c3OCOc3c-12)Cc1ccccc1	4d	Gu_2014	mitoxantrone accumulation (%)	250	1
812	O1c2c(OC1)c-1c(cc2OC)C[NH+](Cc2cc(OC)c3OCOc3c-12)CCC	4e	Gu_2014	mitoxantrone accumulation (%)	140	0
813	O1c2c(OC1)c-1c(cc2OC)CN(Cc2cc(OC)c3OCOc3c-12)c1ccccc1	4f	Gu_2014	mitoxantrone accumulation (%)	150	0
814	O1c2c(OC1)c-1c(cc2OC)C[NH+](Cc2cc(OC)c3OCOc3c-12)C	4g	Gu_2014	mitoxantrone accumulation (%)	120	0
815	O1c2c(OC1)c-1c(cc2OC)C[NH+](Cc2cc(OC)c3OCOc3c-12)CCc1ccccc1	4h	Gu_2014	mitoxantrone accumulation (%)	350	1
816	O1c2c(OC1)c-1c(cc2OC)C[NH+](Cc2cc(OC)c3OCOc3c-12)CCc1cc2OCOc2cc1	4i	Gu_2014	mitoxantrone accumulation (%)	350	1
817	O1c2c(OC1)c-1c(cc2OC)C[NH+](Cc2cc(OC)c3OCOc3c-12)CCO	4j	Gu_2014	mitoxantrone accumulation (%)	100	0
818	O1c2c(OC1)c(OC)cc(C(OC)=O)c2-c1c2OCOc2c(OC)cc1\C=C\C(=O)c1ccccc1	8a	Gu_2014_2	mitoxantrone accumulation (%)	130	0
819	O1c2c(OC1)c(OC)cc(C(OC)=O)c2-c1c2OCOc2c(OC)cc1\C=C\C(=O)c1ccc(O)cc1	8b	Gu_2014_2	mitoxantrone accumulation (%)	150	0
820	O1c2c(OC1)c(OC)cc(C(OC)=O)c2-c1c2OCOc2c(OC)cc1\C=C\C(=O)c1ccc(OC)cc1	8C	Gu_2014_2	mitoxantrone accumulation (%)	160	0
821	O1c2c(OC1)c(OC)cc(C(OC)=O)c2-c1c2OCOc2c(OC)cc1\C=C\C(=O)c1ccccc1OC	8d	Gu_2014_2	mitoxantrone accumulation (%)	230	1
822	O1c2c(OC1)c(OC)cc(C(OC)=O)c2-c1c2OCOc2c(OC)cc1\C=C\C(=O)c1ccc(OC)cc1OC	8e	Gu_2014_2	mitoxantrone accumulation (%)	150	0
823	O1c2c(OC1)c(OC)cc(C(OC)=O)c2-c1c2OCOc2c(OC)cc1\C=C\C(=O)c1cc(OC)ccc1OC	8f	Gu_2014_2	mitoxantrone accumulation (%)	350	1
824	O1c2c(OC1)c(OC)cc(C(OC)=O)c2-c1c2OCOc2c(OC)cc1\C=C\C(=O)c1cc(ccc1C)C	8g	Gu_2014_2	mitoxantrone accumulation (%)	340	1
825	O1c2c(OC1)c(OC)cc(C(OC)=O)c2-c1c2OCOc2c(OC)cc1\C=C\C(=O)c1cc(OC)c(OC)c(OC)c1	8h	Gu_2014_2	mitoxantrone accumulation (%)	190	1
826	O1c2c(OC1)c(OC)cc(C(OC)=O)c2-c1c2OCOc2c(OC)cc1\C=C\C(=O)c1ccc([N+](=O)[O-])cc1	8i	Gu_2014_2	mitoxantrone accumulation (%)	130	0
827	O1[C@]2([C@@H]3[C@H]([C@H]4[C@H]5[C@H](CC[C@]24C)[C@]2(CCC(=O)C=C2[C@H]2[C@@H]5C2)C)C3)CCC1=O	Drospirenone	Montanari_2017	%fluorescence intensity compared to Ko143	<15	0
828	O(C)c1ccc(cc1)C(=O)Nc1ccccc1CCC1[NH+](CCCC1)C	Encainide	Montanari_2017	%fluorescence intensity compared to Ko143	<15	0
829	Clc1cc(Cl)cc2c1cc(c1c2cc(cc1)C(F)(F)F)C(O)CC[NH+](CCCC)CCCC	Halofantrine	Montanari_2017	%fluorescence intensity compared to Ko143	<15	0
830	S(=O)(=O)(Nc1cc(OC)c(Nc2c3c([nH+]c4c2cccc4)cccc3)cc1)C	Amsacrine	Montanari_2017	%fluorescence intensity compared to Ko143	<15	0
831	Clc1c[nH+]cc(Cl)c1NC(=O)c1cc(OCC2CC2)c(OC(F)F)cc1	Roflumilast	Montanari_2017	%fluorescence intensity compared to Ko143	62	1
832	O(C)c1cc2[C@]34[C@@H]([C@@H]([NH+](CC3)C)Cc2cc1)CCCC4	Dextromethorphan	Montanari_2017	%fluorescence intensity compared to Ko143	<15	0
833	[NH+](Cc1c2c(ccc1)cccc2)(C\C=C\C#CC(C)(C)C)C	Terbinafine	Montanari_2017	%fluorescence intensity compared to Ko143	<15	0
834	O[C@@H]1C\C(=C/C=C\2/C3CCC(C(CCCC(C)C)C)C3(CCC/2)C)\C(CC1)=C	Cholecalciferol	Montanari_2017	%fluorescence intensity compared to Ko143	<15	0
835	[NH+](Cc1c2c(ccc1)cccc2)(Cc1ccc(cc1)C(C)(C)C)C	Butenafine	Montanari_2017	%fluorescence intensity compared to Ko143	<15	0
836	Clc1cc(C(=O)NC2CC[NH+](CC2OC)CCCOc2ccc(F)cc2)c(OC)cc1N	Cisapride	Montanari_2017	%fluorescence intensity compared to Ko143	84	1
837	O(C(=O)c1ccc(cc1NC(=O)c1cc2c(nccc2)cc1)-c1ccc(cc1)C[NH+]1CCc2c(C1)cccc2)C	CHEMBL2331726	Ochoa-Puentes_2013	IC50(uM)	0.641	1
838	O(C)c1cc2CC[NH+](Cc2cc1OC)CCc1ccc(NC(=O)c2c3Nc4c(cccc4OC)C(=O)c3ccc2)cc1	CHEMBL396298 Elacridar	Ochoa-Puentes_2013 Ahmed-Belkacem_2005	IC50(uM) reported by Montanari_2014	0.127 INHIBITOR	1
839	O(CCOCCOCCOC)c1cc2CC[NH+](Cc2cc1OC)Cc1ccc(cc1)-c1cc(NC(=O)c2cc3c(nccc3)cc2)c(cc1)C(OC)=O	CHEMBL2331720	Ochoa-Puentes_2013	IC50(uM)	0.237	1
840	O(C(=O)c1ccc(cc1NC(=O)c1nc2c(cc1)cccc2)-c1ccc(cc1)C[NH+]1CCc2c(C1)cccc2)C	CHEMBL2331725	Ochoa-Puentes_2013	IC50(uM)	1.461	1
841	O(C)c1cc2CC[NH+](Cc2cc1OC)Cc1ccc(cc1)-c1cc(NC(=O)c2nc3c(cc2)cccc3)c(cc1)C(OC)=O	CHEMBL2331717	Ochoa-Puentes_2013	IC50(uM)	0.943	1
842	O(CCOCCOCCOC)c1cc2CC[NH+](Cc2cc1OC)Cc1ccc(cc1)-c1cc(NC(=O)c2nc3c(cc2)cccc3)c(cc1)C(OC)=O	CHEMBL2331719	Ochoa-Puentes_2013	IC50(uM)	1.031	1
843	O(CCOCCOCCOC)c1cc2c(cc1OC)CC[NH+](C2)CCc1ccc(cc1)-c1cc(NC(=O)c2nc3c(cc2)cccc3)c(cc1)C(OC)=O	CHEMBL2331715	Ochoa-Puentes_2013	IC50(uM)	0.76	1
844	O(C(=O)c1ccc(cc1NC(=O)c1nc2c(cc1)cccc2)-c1ccc(cc1)CC[NH+]1CCc2c(C1)cccc2)C	CHEMBL2331723	Ochoa-Puentes_2013	IC50(uM)	1.1	1
845	O(C)c1cc2CC[NH+](Cc2cc1OC)CCc1ccc(cc1)-c1cc(NC(=O)c2nc3c(cc2)cccc3)c(cc1)C(OC)=O	CHEMBL2331724	Ochoa-Puentes_2013	IC50(uM)	3.214	1
846	O(C)c1cc2CC[NH+](Cc2cc1OC)CCc1ccc(NC(=O)c2cc(NC(=O)c3nc4c(cc3)cccc4)c(cc2)C(OC)=O)cc1	CHEMBL502503 103591269	Ochoa-Puentes_2013 Kuhnle_2009	IC50(uM) reported by Montanari_2014	0.065 INHIBITOR	1
847	O(CCOCCOCCOC)c1cc2c(cc1OC)CC[NH+](C2)Cc1ccc(cc1)-c1cc(NC(=O)c2nc3c(cc2)cccc3)c(cc1)C(OC)=O	CHEMBL2331721	Ochoa-Puentes_2013	IC50(uM)	0.591	1
848	O(C)c1cc(C(=O)Nc2ccc(cc2)CC[NH+]2CCc3cc(OC)c(OC)cc3C2)c(NC(=O)c2cc3c(nc2)cccc3)cc1OC	CHEMBL348475 103405029	Ochoa-Puentes_2013 Kuhnle_2009	IC50(uM) reported by Montanari_2014	0.526 INHIBITOR	1
849	O(C)c1cc2CC[NH+](Cc2cc1OC)Cc1ccc(cc1)-c1cc(NC(=O)c2cc3c(nccc3)cc2)c(cc1)C(OC)=O	CHEMBL2331718	Ochoa-Puentes_2013	IC50(uM)	1.54	1
850	O(CCOCCOCCOC)c1cc2CC[NH+](Cc2cc1OCCOCCOCCOC)Cc1ccc(cc1)-c1cc(NC(=O)c2nc3c(cc2)cccc3)c(cc1)C(OC)=O	CHEMBL2331722	Ochoa-Puentes_2013	IC50(uM)	0.839	1
851	O(CCOCCOCCOC)c1cc2CC[NH+](Cc2cc1OCCOCCOCCOC)CCc1ccc(cc1)-c1cc(NC(=O)c2nc3c(cc2)cccc3)c(cc1)C(OC)=O	CHEMBL2331716	Ochoa-Puentes_2013	IC50(uM)	0.544	1
852	Brc1ccc(cc1)COc1c2c(OC(=CC2=O)C(=O)N(CCc2c3c(n(c2)C)cccc3)C)ccc1	CHEMBL3108796	winter_2013	EC50（uM）	0.5	1
853	Brc1ccc(cc1)COc1c2c(OC(=CC2=O)C(=O)NCCc2c3c([nH]c2)cc(OC)cc3)ccc1	CHEMBL3110289	winter_2013	EC50（uM）	0.08	1
854	Brc1ccc(cc1)COc1c2c(OC(=CC2=O)C(=O)NCCc2c3c(n(c2)C)cccc3)ccc1	CHEMBL3110290	winter_2013	EC50（uM）	0.22	1
855	Brc1ccc(cc1)COc1c2c(OC(=CC2=O)C(=O)N(CCc2c3c([nH]c2)cccc3)C)ccc1	CHEMBL3110291	winter_2013	EC50（uM）	0.57	1
856	Brc1ccc(cc1)COc1c2c(OC(=CC2=O)C(=O)N(CCc2c3cc(OC)ccc3[nH]c2)C)ccc1	CHEMBL3110292	winter_2013	EC50（uM）	0.53	1
857	Brc1ccc(cc1)COc1cc2c(OC(=CC2=O)C(=O)NCCc2c3cc(OC)ccc3[nH]c2)cc1	CHEMBL3110293	winter_2013	EC50（uM）	0.1	1
858	Brc1ccc(cc1)COc1cc2c(OC(=CC2=O)C(=O)N(CCc2c3c([nH]c2)cccc3)C)cc1	CHEMBL3110294	winter_2013	EC50（uM）	1.67	1
859	Brc1ccc(cc1)COc1cc2c(OC(=CC2=O)C(=O)N(CCc2c3c(n(c2)C)cccc3)C)cc1	CHEMBL3110295	winter_2013	EC50（uM）	2.15	1
860	Brc1ccc(cc1)COc1cc2OC(=CC(=O)c2cc1)C(=O)NCCc1c2cc(OC)ccc2[nH]c1	CHEMBL3110296	winter_2013	EC50（uM）	1.54	1
861	Brc1ccc(cc1)COc1c2c(OC(=CC2=O)C(=O)NCc2nnn(c2)Cc2ccccc2)ccc1	CHEMBL3110297	winter_2013	EC50（uM）	0.5	1
862	Brc1ccc(cc1)Cn1nnc(c1)CNC(=O)C=1Oc2c(C(=O)C=1)c(OCc1ccc(Br)cc1)ccc2	CHEMBL3110298	winter_2013	EC50（uM）	0.71	1
863	Brc1ccc(cc1)COc1c2c(OC(=CC2=O)C(=O)NCc2nnn(c2)CCc2c3c([nH]c2)cccc3)ccc1	CHEMBL3110299	winter_2013	EC50（uM）	0.46	1
864	Brc1ccc(cc1)COc1c2c(OC(=CC2=O)C[NH+](CCc2c3cc(OC)ccc3[nH]c2)C)ccc1	CHEMBL3110301	winter_2013	EC50（uM）	0.6	1
865	s1c2nc(C)c(C(OCCOC)=O)c(c2c(N)c1C(=O)c1ccc(OC)cc1)-c1cc(OC)c(OC)c(OC)c1	6r	Krauze_2014	EC50（uM）	0.2	1
866	s1c2nc(cc(c2c(N)c1C(=O)c1ccc(OC)cc1OC)C)C	6x	Krauze_2014	EC50（uM）	ne	0
867	s1c2nc(C)c(C(OCC)=O)c(c2c(N)c1C(=O)c1ccc(OC)cc1)-c1cc(OC)c(OC)c(OC)c1	6k	Krauze_2014	EC50（uM）	0.7	1
868	o1c2c(c(-c3ccc(OC)cc3)c(C(OCC)=O)c(c2)C)c(N)c1C(=O)c1cc(OC)c(OC)c(OC)c1	14b	Krauze_2014	EC50（uM）	ne	0
869	s1c2nc(C)c(C(=O)C)c(c2c(N)c1C(=O)c1ccc(OC)cc1)-c1cc(OC)c(OC)c(OC)c1	6a	Krauze_2014	EC50（uM）	2.6	1
870	s1c2nc(C)c(C(OCC)=O)c(c2c(N)c1C(=O)c1ccc(OC)cc1)-c1ccccc1	6f	Krauze_2014	EC50（uM）	ne	0
871	s1c2nc(C)c(C(OCC)=O)c(c2c(N)c1C(=O)c1ccc(OC)cc1)-c1ccc(OC)cc1	6g	Krauze_2014	EC50（uM）	0.4	1
872	s1c2nc(-c3cc(OC)c(OC)c(OC)c3)c(C(OCC)=O)c(c2c(N)c1C(=O)c1ccc(OC)cc1)-c1cc(OC)c(OC)c(OC)c1	6v	Krauze_2014	EC50（uM）	3	1
873	s1c2nc(C)c(C(OCCOC)=O)c(c2c(N)c1C(=O)c1ccc(OC)cc1)-c1ccc(OC)cc1	6p	Krauze_2014	EC50（uM）	0.8	1
874	s1c2nc(N)c(C#N)c(c2c(N)c1C(=O)c1ccc(OC)cc1)-c1cc(OC)c(OC)c(OC)c1	6w	Krauze_2014	EC50（uM）	ne	0
875	s1c2nc(C)c(C(OCCOC)=O)c(c2c(N)c1C(=O)c1ccc(OC)cc1OC)-c1cc(OC)c(OC)c(OC)c1	6s	Krauze_2014	EC50（uM）	2.5	1
876	s1c2nc(C)c(C(OC)=O)c(c2c(N)c1C(=O)c1ccc(OC)cc1)-c1ccc(OC)cc1	6b	Krauze_2014	EC50（uM）	0.7	1
877	s1c2nc(C)c(C(OCCOC)=O)c(c2c(N)c1C(=O)c1cc(OC)c(OC)c(OC)c1)-c1cc(OC)c(OC)c(OC)c1	6t	Krauze_2014	EC50（uM）	ne	0
878	s1c2nc(C)c(C(OCCCC)=O)c(c2c(N)c1C(=O)c1ccc(OC)cc1)-c1cc(OC)c(OC)c(OC)c1	6o	Krauze_2014	EC50（uM）	0.4	1
879	o1c2nc(C)c(C(OCC)=O)c(c2c(N)c1C(=O)c1ccc(OC)cc1)-c1cc(OC)c(OC)c(OC)c1	14a	Krauze_2014	EC50（uM）	3.4	1
880	s1c2nc(C)c(C(OC)=O)c(c2c(N)c1C(=O)c1ccc(OC)cc1)-c1cc(OC)c(OC)cc1	6c	Krauze_2014	EC50（uM）	3.6	1
881	s1c2nc(C)c(C(OCCOC)=O)c(c2c(N)c1C(=O)c1ccccc1)-c1cc(OC)c(OC)c(OC)c1	6q	Krauze_2014	EC50（uM）	1.3	1
882	s1c2nc(C)c(C(OCC)=O)c(c2c(N)c1C(=O)c1ccccc1)-c1cc(OC)c(OC)c(OC)c1	6j	Krauze_2014	EC50（uM）	1.5	1
883	s1c2nc(C)c(C(OCC)=O)c(c2c(N)c1C(=O)c1ccc(OC)cc1)-c1ccc(OCC)cc1	6m	Krauze_2014	EC50（uM）	1.3	1
884	s1c2nc(cc(c2c(N)c1C(=O)c1ccc(OC)cc1)-c1cc(OC)c(OC)c(OC)c1)C	6y	Krauze_2014	EC50（uM）	ne	0
885	s1c2nc(C)c(C(OCC)=O)c(c2c(N)c1C(=O)c1ccc(OC)cc1OC)-c1cc(OC)c(OC)c(OC)c1	6l	Krauze_2014	EC50（uM）	2.6	1
886	s1c2nc(C)c(C(OCCOC)=O)c(c2c(NC(=O)C)c1C(=O)c1ccc(OC)cc1)-c1cc(OC)c(OC)c(OC)c1	7	Krauze_2014	EC50（uM）	ne	0
887	s1c2nc(C)c(C(OCC)=O)c(c2c(N)c1C(=O)c1ccc(OC)cc1)-c1ccc(OCCCC)cc1	6n	Krauze_2014	EC50（uM）	ne	0
888	s1c2nc(C)c(C(OC)=O)c(c2c(N)c1C(=O)c1ccc(OC)cc1OC)-c1cc(OC)c(OC)cc1	6d	Krauze_2014	EC50（uM）	4.1	1
889	s1c2nc(C)c(C(OC)=O)c(c2c(N)c1C(=O)Nc1cc(OC)c(OC)cc1)-c1cc(OC)c(OC)c(OC)c1	6e	Krauze_2014	EC50（uM）	ne	0
890	s1c2nc(C)c(C(OCCOCCC)=O)c(c2c(N)c1C(=O)c1ccc(OC)cc1)-c1cc(OC)c(OC)c(OC)c1	6u	Krauze_2014	EC50（uM）	0.6	1
891	O(C)c1cc2CC[NH+](Cc2cc1OC)CCc1ccc(NC(=O)c2ccccc2NC(=O)c2cc3c(nc2)cccc3)cc1	103405035 103405035	Li_2015 Pick_2008	%inhibition of PhA efflux reported by Montanari_2014	active INHIBITOR	1
892	o1cccc1C(=O)Nc1ccccc1C(=O)Nc1ccc(cc1)CC[NH+]1CCc2cc(OC)c(OC)cc2C1	103404739	Li_2015	%inhibition of PhA efflux	active	1
893	O(C)c1cc2[nH]c3c(C[C@@H]4N([C@H]3CC(C)C)C(=O)[C@@H](NC4=O)C)c2cc1C	13C	Li_2016	IC50(uM)	1.98	1
894	O(C)c1cc2[nH]c3c(C[C@@H]4N([C@H]3CC(C)C)C(=O)[C@@H](NC4=O)C)c2cc1	13A;Compound A	Li_2016	IC50(uM)	0.6	1
895	O=C1N2[C@@H](Cc3c([nH]c4c3cccc4)[C@@H]2CC(C)C)C(=O)N[C@H]1CCC(OC(C)(C)C)=O	Ko134	Li_2016	IC50(uM)	3.25	1
896	O=C1N2[C@@H](Cc3c([nH]c4c3cccc4)[C@@H]2CC(C)C)C(=O)N[C@H]1CCC(=O)NC(C)(C)C	5	Li_2016	IC50(uM)	3.87	1
897	Ic1cc(cc(OC)c1OC)\C=C\C(=O)c1cc2c(cc1)cccc2	1c	Schmitt_2016_2	IC50(uM)	7.8	1
898	Ic1cc(cc(OC)c1OC)C1N(N=C(C1)c1cc2c(cc1)cccc2)C(=O)C	2c	Schmitt_2016_2	IC50(uM)	7.1	1
899	Clc1cc(cc(OC)c1OC)C1N(N=C(C1)c1cc2c(cc1)cccc2)C(=O)C	2a	Schmitt_2016_2	IC50(uM)	7.4	1
900	Clc1cc(cc(OC)c1OC)\C=C\C(=O)c1cc2c(cc1)cccc2	1a	Schmitt_2016_2	IC50(uM)	8.7	1
901	Brc1cc(cc(OC)c1OC)\C=C\C(=O)c1cc2c(cc1)cccc2	1b	Schmitt_2016_2	IC50(uM)	4.9	1
902	O(C)c1c(OC)cc(cc1OC)\C=C\C(=O)c1cc2c(cc1)cccc2	1d	Schmitt_2016_2	IC50(uM)	2.4	1
903	Brc1cc(cc(OC)c1OC)C1N(N=C(C1)c1cc2c(cc1)cccc2)C(=O)C	2b	Schmitt_2016_2	IC50(uM)	8.9	1
904	Brc1c(Br)c(Br)c2c(C(OC2=O)(c2cc(S(=O)(=O)[O-])c(O)cc2)c2cc(S(=O)(=O)[O-])c(O)cc2)c1Br	Bromosulfalein	Matsson_2009	reported by Montanari_2014	INACTIVE	0
905	Brc1c(nc(nc1Oc1c(cc(cc1C)C#N)C)Nc1ccc(cc1)C#N)N	103268452	Zembruski_2011	reported by Montanari_2014	INHIBITOR	1
906	Brc1cc(Br)cc2[C@H]3[C@@H](OCc12)C(OC1=C3C(=O)C=2OC([C@H]3[C@@H](C=2C1=O)c1c(OC3)c(Br)cc(Br)c1)(C)C)(C)C	103649249	Jimenez-Alonso_2008	reported by Montanari_2014	INACTIVE	0
907	Brc1cc(N2CCN(CC2)c2nc(nc3c2cccc3)-c2ccccc2)ccc1	19	phenylquinazolines_Juvale_2012	reported by Montanari_2014	INHIBITOR	1
908	Brc1cc(Nc2nc(nc3c2cccc3)-c2ccccc2)ccc1	3	phenylquinazolines_Juvale_2012	reported by Montanari_2014	INHIBITOR	1
909	Brc1cc(Nc2ncnc3c2cc(NC(=O)C#CC)cc3)ccc1	EKI-785	Mao_2004	reported by Montanari_2014	INHIBITOR	1
910	Brc1cc(cc(Br)c1O)\C=C(/OC)\C(=O)N\C=C\c1ccc(O)cc1	103728141	Takada_2010	reported by Montanari_2014	INHIBITOR	1
911	Brc1cc(cc(Br)c1O)\C=C(/OC)\C(=O)N\C=C\c1ccc(OC(=O)C)cc1	103728142	Takada_2010	reported by Montanari_2014	INACTIVE	0
912	Brc1cc(cc(OCC)c1OCc1ccc(F)cc1)C[NH2+]CCSc1nnnn1C	17433121	Ivnitski-Steele_2008	reported by Montanari_2014	INACTIVE	0
913	Brc1cc(ccc1)-c1nc(sc1)/C(=C/Nc1nccc(c1)C)/C#N	17412468	Ivnitski-Steele_2008	reported by Montanari_2014	INACTIVE	0
914	Brc1cc(ccc1)C(=O)Nc1ccc(cc1)CC[N@@H+]1CCc2cc(OC)c(OC)cc2C1	103569259	Pick_2008	reported by Montanari_2014	INACTIVE	0
915	Brc1cc(ccc1)C(=O)\C=C\c1ccc(N(C)C)cc1	17412977	Ivnitski-Steele_2008	reported by Montanari_2014	INACTIVE	0
916	Brc1cc(ccc1)Cn1c2c(nc1NC[C@H](O)C)N(C)C(=O)N(C)C2=O	851698	Ivnitski-Steele_2008	reported by Montanari_2014	INACTIVE	0
917	Brc1cc(cnc1)C(OC[C@@H]1C[C@@]2(OC)[C@H]([N@@H+](C1)C)Cc1c3c2cccc3n(c1)C)=O	Nicergoline	Pan_2013	reported by Montanari_2014	INACTIVE	0
918	Brc1cc2c(NC(=S)N(CCCCCC(=O)NC[C@@H]3OCCC3)C2=O)cc1	14737641	Ivnitski-Steele_2008	reported by Montanari_2014	INACTIVE	0
919	Brc1ccc(NC(=O)COc2ccccc2C(OCC(=O)Nc2ccccc2)=O)cc1	22401025	Ivnitski-Steele_2008	reported by Montanari_2014	INACTIVE	0
920	Brc1ccc(Nc2nc(nc3c2cccc3)-c2ccccc2)cc1	4	phenylquinazolines_Juvale_2012	reported by Montanari_2014	INHIBITOR	1
921	Brc1ccc(S(=O)(=O)N2CCN(CC2)C=2n3ncnc3N=C(C=2)c2ccccc2)cc1	846127	Ivnitski-Steele_2008	reported by Montanari_2014	INACTIVE	0
922	Brc1ccc(cc1)-c1nn2c(N=C(C)C(C)=C2N2CCN(CC2)C(=O)c2ccoc2)c1	87550713	Ivnitski-Steele_2010	reported by Montanari_2014	INHIBITOR	1
923	Brc1ccc(cc1)C(=O)\C(=C\c1ccc(N(CC)CC)cc1)\C#N	17506296	Ivnitski-Steele_2008	reported by Montanari_2014	INACTIVE	0
924	Brc1ccccc1C(=O)Nc1ccc(cc1)CC[N@@H+]1CCc2cc(OC)c(OC)cc2C1	103569295	Pick_2008	reported by Montanari_2014	INACTIVE	0
925	Brc1ccccc1Nc1nc(nc2c1cccc2)-c1ccccc1	2	phenylquinazolines_Juvale_2012	reported by Montanari_2014	INHIBITOR	1
926	Brc1ccccc1OCCC[N@H+](Cc1ccccc1)C	24796254	Ivnitski-Steele_2008	reported by Montanari_2014	INACTIVE	0
927	Brc1ccsc1-c1nc(nc(c1)C)-n1cccc1	24818202	Ivnitski-Steele_2008	reported by Montanari_2014	INACTIVE	0
928	Brc1cn(nc1)CCNC(=S)Nc1ccc(cc1)[C@@H](CC)C	24797597	Ivnitski-Steele_2008	reported by Montanari_2014	INACTIVE	0
929	Brc1oc(cc1)-c1nc(on1)-c1ccccc1[N+](=O)[O-]	17509379	Ivnitski-Steele_2008	reported by Montanari_2014	INACTIVE	0
930	ClCC(=O)N[C@H](CC)c1ccc(cc1)C	24835935	Ivnitski-Steele_2008	reported by Montanari_2014	INACTIVE	0
931	ClCC(=O)Nc1n(Cc2ccc(F)cc2)c(C)c(C)c1C#N	24830974	Ivnitski-Steele_2008	reported by Montanari_2014	INACTIVE	0
932	Clc1c(cccc1Cl)-c1oc(cc1)[C@@H]1\C(=C(\OC)/O)\C(=NC(C)=C1C(OC)=O)C	17512292	Ivnitski-Steele_2008	reported by Montanari_2014	INACTIVE	0
933	Clc1c(cccc1Cl)[C@H]1C(C(OCC)=O)=C(NC(C)=C1C(OC)=O)C	Felodipine	Matsson_2007	reported by Montanari_2014	INHIBITOR	1
934	Clc1c(n(nc1[N+](=O)[O-])CCCC(=O)Nc1cc([N+](=O)[O-])cc(Oc2ccccc2)c1)C	17509299	Ivnitski-Steele_2008	reported by Montanari_2014	INACTIVE	0
935	Clc1cc(C(=O)NCC[NH+](CC)CC)c(OC)cc1N	Metoclopramide	Matsson_2007	reported by Montanari_2014	INACTIVE	0
936	Clc1cc(C(=O)NCCc2ccc(S(=O)([O-])=NC(=O)NC3CCCCC3)cc2)c(OC)cc1	Glibenclamide	Matsson_2007	reported by Montanari_2014	INHIBITOR	1
937	Clc1cc(C(=O)Nc2ccc(cc2)CCO)c(NC(=O)c2ccc([N+](=O)[O-])cc2)cc1	13	Marighetti_2013	reported by Montanari_2014	INHIBITOR	1
938	Clc1cc(C(F)(F)F)c(NC(=O)c2ccccc2)cc1	17433277	Ivnitski-Steele_2008	reported by Montanari_2014	INACTIVE	0
939	Clc1cc(Cl)ccc1C(=O)Nc1ccc(cc1)C(=O)NC[C@H]1OCCc2c1cccc2	17433319	Ivnitski-Steele_2008	reported by Montanari_2014	INACTIVE	0
940	Clc1cc(Cl)ccc1OCC(=O)NCCOc1nc(nc(n1)N(C)C)N(C)C	14723580	Ivnitski-Steele_2008	reported by Montanari_2014	INACTIVE	0
941	Clc1cc(Cl)ccc1OCCCc1nnc(SCC(=O)Nc2cc(F)ccc2)n1C	17433214	Ivnitski-Steele_2008	reported by Montanari_2014	INACTIVE	0
942	Clc1cc(Cl)ccc1[C@@]1(O[C@H](CO1)COc1ccc(N2CCN(CC2)C(=O)C)cc1)Cn1ccnc1	Ketoconazole	Matsson_2007	reported by Montanari_2014	INHIBITOR	1
943	Clc1cc(Cl)cnc1NC(=O)CSc1nc2c(n1-c1ccc(cc1)C)cccc2	22404620	Ivnitski-Steele_2008	reported by Montanari_2014	INACTIVE	0
944	Clc1cc(Cl)cnc1N\N=C(/C)\c1ccc(S(=O)(=O)NCc2occc2)cc1	22410497	Ivnitski-Steele_2008	reported by Montanari_2014	INACTIVE	0
945	Clc1cc(N2CCN(CC2)c2nc(nc3c2cccc3)-c2ccccc2)ccc1	20	phenylquinazolines_Juvale_2012	reported by Montanari_2014	INHIBITOR	1
946	Clc1cc(N2CCN(CC2)c2nc(nc3c2cccc3)-c2ccccc2)ccc1F	21	phenylquinazolines_Juvale_2012	reported by Montanari_2014	INHIBITOR	1
947	Clc1cc(NC(=O)COC(=O)CCCN2C(=O)c3c(cccc3)C2=O)c(OC)cc1	22403400	Ivnitski-Steele_2008	reported by Montanari_2014	INACTIVE	0
948	Clc1cc(NC(=O)COC(=O)c2[nH]c(C)c(C(=O)C)c2C)c([N+](=O)[O-])cc1	17517128	Ivnitski-Steele_2008	reported by Montanari_2014	INACTIVE	0
949	Clc1cc(NC(=O)Cc2ccccc2)c(Sc2ccccc2)cc1	22403609	Ivnitski-Steele_2008	reported by Montanari_2014	INACTIVE	0
950	Clc1cc(NC(=O)NCCCc2ccccc2)ccc1	17433005	Ivnitski-Steele_2008	reported by Montanari_2014	INACTIVE	0
951	Clc1cc(NC(=O)NCc2ncccc2)ccc1Cl	4256279	Ivnitski-Steele_2008	reported by Montanari_2014	INACTIVE	0
952	Clc1cc(NC(=O)Nc2cc3OCOc3cc2)ccc1	4265275	Ivnitski-Steele_2008	reported by Montanari_2014	INACTIVE	0
953	Clc1cc(NC(=O)c2c3n(C=CC=C3)c(CCc3ccncc3)c2C)ccc1	22407329	Ivnitski-Steele_2008	reported by Montanari_2014	INACTIVE	0
954	Clc1cc(NC(=O)c2ccc([N+](=O)[O-])cc2)c(cc1)C(=O)Nc1ccc(cc1)CCO	12	Marighetti_2013	reported by Montanari_2014	INHIBITOR	1
955	Clc1cc(NC(=S)N[C@@H](Cc2sccc2)C)ccc1Cl	22402816	Ivnitski-Steele_2008	reported by Montanari_2014	INACTIVE	0
956	Clc1cc(NC(OC/2=Nc3c(cccc3)\C\2=N\N)=O)ccc1	NSC320852	Henrich_2007	reported by Montanari_2014	INHIBITOR	1
957	Clc1cc(Nc2nc(nc3c2cccc3)-c2ccccc2)ccc1	5	phenylquinazolines_Juvale_2012	reported by Montanari_2014	INHIBITOR	1
958	Clc1cc(Nc2nc(nc3c2cccc3)-c2ccccc2)ccc1F	6	phenylquinazolines_Juvale_2012	reported by Montanari_2014	INHIBITOR	1
959	Clc1cc(Nc2nc(nc3n(cnc23)C(C)C)N[C@H](C(C)C)CO)ccc1	Purvalanol A	cdkinhib_An_2008	reported by Montanari_2014	INHIBITOR	1
960	Clc1cc(Nc2nc(nc3n(ncc23)C)Nc2cc(Cl)ccc2)ccc1	NSC11668	Henrich_2007	reported by Montanari_2014	INHIBITOR	1
961	Clc1cc(Nc2ncnc3c2cc(NC(=O)C=C)c(OCCC[NH+]2CCOCC2)c3)ccc1F	CI1033	Mao_2004	reported by Montanari_2014	INHIBITOR	1
962	Clc1cc(Nc2ncnc3c2cc(OCCC[NH+]2CCOCC2)c(OC)c3)ccc1F	Gefitinib	Matsson_2007	reported by Montanari_2014	INHIBITOR	1
963	Clc1cc([N+](=O)[O-])c(NCCNS(=O)(=O)c2ccccc2)cc1	17505098	Ivnitski-Steele_2008	reported by Montanari_2014	INACTIVE	0
964	Clc1cc(ccc1)-c1nn2c(N=C(C)C(C)=C2N2CCN(CC2)C(=O)c2ccoc2)c1	92764892	Ivnitski-Steele_2010	reported by Montanari_2014	INHIBITOR	1
965	Clc1cc(ccc1)-c1nn2c(N=C(C)C(C)=C2N2CCN(CC2)C(=O)c2occc2)c1	85240363	Njus_2010	reported by Montanari_2014	INHIBITOR	1
966	Clc1cc(ccc1)-c1nn2c(N=C(C=C2N2CCN(CC2)C(=O)C)c2occc2)c1	99376136	Ivnitski-Steele_2010	reported by Montanari_2014	INHIBITOR	1
967	Clc1cc(ccc1)-c1nn2c(N=C(C=C2N2CCN(CC2)C(=O)Cc2ccccc2)c2ccccc2)c1	92123924	Njus_2010	reported by Montanari_2014	INHIBITOR	1
968	Clc1cc(ccc1)-c1nn2c(N=C(C=C2N2CCN(CC2)C(=O)c2cc(OC)ccc2)c2ccccc2)c1	92123925	Njus_2010	reported by Montanari_2014	INHIBITOR	1
969	Clc1cc(ccc1)-c1nn2c(N=C(C=C2N2CCN(CC2)C(=O)c2ccncc2)c2ccccc2)c1	87577986	Njus_2010	reported by Montanari_2014	INHIBITOR	1
970	Clc1cc(ccc1)-c1nn2c(N=C(C=C2N2CCN(CC2)C(=O)c2ccoc2)c2cc(F)ccc2)c1	87550714	Ivnitski-Steele_2010	reported by Montanari_2014	INHIBITOR	1
971	Clc1cc(ccc1)-c1nn2c(N=C(C=C2N2CCN(CC2)C(=O)c2ccoc2)c2ccncc2)c1	87577984	Njus_2010	reported by Montanari_2014	INHIBITOR	1
972	Clc1cc(ccc1)C(=O)[C@@H]([NH2+]C(C)(C)C)C	Bupropion	Matsson_2007	reported by Montanari_2014	INACTIVE	0
973	Clc1cc(ccc1)C(=O)NC1=CC(C(OC)=O)=C(OC1=O)\C=C\Nc1cc(cc(c1)C)C	24820374	Ivnitski-Steele_2008	reported by Montanari_2014	INACTIVE	0
974	Clc1cc(ccc1)C(=O)Nc1ccccc1C(=O)Nc1ccc(cc1)CCO	21	Marighetti_2013	reported by Montanari_2014	INHIBITOR	1
975	Clc1cc(ccc1Cl)CSC1=NCCN1S(=O)(=O)c1ccc(Cl)cc1	17514556	Ivnitski-Steele_2008	reported by Montanari_2014	INACTIVE	0
976	Clc1cc(ccc1Cl)CSc1nnc(n1N)Cc1c2c(ccc1)cccc2	22407717	Ivnitski-Steele_2008	reported by Montanari_2014	INACTIVE	0
977	Clc1cc(ccc1Cl)\C=C\C(=O)c1c2c(ccc1O)cccc2	136929456	Juvale_2012	reported by Montanari_2014	INHIBITOR	1
978	Clc1cc(ccc1Cl)\C=C\C(=O)c1ccc(OC)cc1O	136926279	Juvale_2012	reported by Montanari_2014	INACTIVE	0
979	Clc1cc(ccc1Cl)\C=C\C(=O)c1ccc(OO)cc1OC	136945677	Juvale_2012	reported by Montanari_2014	INACTIVE	0
980	Clc1cc(ccc1Cl)\C=C\C(=O)c1ccc2c(cccc2)c1O	136926281	Juvale_2012	reported by Montanari_2014	INACTIVE	0
981	Clc1cc(ccc1OC[C@@H](O)C[NH+]1CC[NH+](CC1)C[C@H](O)COc1ccc(cc1Cl)C)C	7972456	Ivnitski-Steele_2008	reported by Montanari_2014	INACTIVE	0
982	Clc1cc(cnc1NN1C(=O)/C(/SC1=S)=C/c1ccc(N(C)C)cc1)C(F)(F)F	14745121	Ivnitski-Steele_2008	reported by Montanari_2014	INACTIVE	0
983	Clc1cc2N(CC(=O)NCC)C(=O)C(=O)N(c2cc1)Cc1ccccc1	22403593	Ivnitski-Steele_2008	reported by Montanari_2014	INACTIVE	0
984	Clc1cc2N(c3c(Sc2cc1)cccc3)CCC[NH+](C)C	Chlorpromazine	Matsson_2007	reported by Montanari_2014	INHIBITOR	1
985	Clc1cc2N(c3c(Sc2cc1)cccc3)CCC[NH+]1CC[NH+](CC1)C	Prochloroperazine	Pan_2013	reported by Montanari_2014	INHIBITOR	1
986	Clc1cc2N=C(SCC(=O)N3CCc4c(C3)cccc4)N(CCOC)C(=O)c2cc1	22409100	Ivnitski-Steele_2008	reported by Montanari_2014	INACTIVE	0
987	Clc1cc2NC(=O)N(c2cc1)C1CC[NH+](CC1)CCCN1c2c(NC1=O)cccc2	Domperidone	Pan_2013	reported by Montanari_2014	INHIBITOR	1
988	Clc1cc2NC(N3CC[NH+](CC3)C)=C3C(=Nc2cc1)C=CC=C3	Clozapine	Wang_2008	reported by Montanari_2014	INACTIVE	0
989	Clc1cc2NC(Oc2cc1)=O	Chlorzoxazone	Matsson_2007	reported by Montanari_2014	INACTIVE	0
990	Clc1cc2NCNS(=O)(=O)c2cc1S(=O)(=O)N	Hydrochlorothiazide	Matsson_2007	reported by Montanari_2014	INACTIVE	0
991	Clc1cc2S(=O)(=O)N=C(Nc2cc1)C	Diazoxide	Matsson_2007	reported by Montanari_2014	INACTIVE	0
992	Clc1cc2c(N(C)C(=O)CN=C2c2ccccc2)cc1	Diazepam	Matsson_2007	reported by Montanari_2014	INACTIVE	0
993	Clc1cc2c(NC(=O)[C@H](O)N=C2c2ccccc2)cc1	Oxazepam	Matsson_2007	reported by Montanari_2014	INACTIVE	0
994	Clc1cc2c(NC(=O)CN=C2c2ccccc2)cc1	Desmethyldiazepam	Matsson_2007	reported by Montanari_2014	INACTIVE	0
995	Clc1cc2c(NC(O[C@]2(C#CC2CC2)C(F)(F)F)=O)cc1	104234240	Zembruski_2011	reported by Montanari_2014	INHIBITOR	1
996	Clc1cc2[nH+]ccc(N[C@@H](CCC[NH+](CC)CC)C)c2cc1	Chloroquine	Matsson_2009	reported by Montanari_2014	INACTIVE	0
997	Clc1cc\2c(Sc3c(cccc3)/C/2=C/CC[NH+](C)C)cc1	Chlorprotixene	Matsson_2007	reported by Montanari_2014	INHIBITOR	1
998	Clc1ccc(-n2nc(CSc3[nH]c4c(n3)cccc4)c(-c3ccccc3)c2N)cc1	22403620	Ivnitski-Steele_2008	reported by Montanari_2014	INACTIVE	0
999	Clc1ccc(Cl)cc1-c1oc(cc1)\C=N\c1nc[nH]n1	858625	Ivnitski-Steele_2008	reported by Montanari_2014	INACTIVE	0
1000	Clc1ccc(NC(=O)\C(=C/c2oc(N3CCCCC3)cc2)\C#N)cc1	17412701	Ivnitski-Steele_2008	reported by Montanari_2014	INACTIVE	0
1001	Clc1ccc(O[C@H]2[C@H](N(c3ccccc3C)C2=O)C[NH2+]CCc2cc(OC)c(OC)cc2)cc1	24812431	Ivnitski-Steele_2008	reported by Montanari_2014	INACTIVE	0
1002	Clc1ccc(Oc2nc(cc(n2)C#N)-c2ccc(OC)cc2)cc1	17504108	Ivnitski-Steele_2008	reported by Montanari_2014	INACTIVE	0
1003	Clc1ccc([N+](=O)[O-])cc1NC(=O)COC(=O)Cc1cc(OC)c(OC)c(OC)c1	17516351	Ivnitski-Steele_2008	reported by Montanari_2014	INACTIVE	0
1004	Clc1ccc(cc1)-c1c2n(nc1C)C(N1CCN(CC1)C(=O)c1occc1)=CC(=N2)C(C)(C)C	85240374	Ivnitski-Steele_2010	reported by Montanari_2014	INACTIVE	0
1005	Clc1ccc(cc1)-c1nc2onc(c2c(c1)C(OCC)=O)C	14744721	Ivnitski-Steele_2008	reported by Montanari_2014	INACTIVE	0
1006	Clc1ccc(cc1)-c1nn(-c2ccccc2)c(Nc2ccccc2N)c1	17516314	Ivnitski-Steele_2008	reported by Montanari_2014	INACTIVE	0
1007	Clc1ccc(cc1)-c1nn(cc1C(=O)NCc1ncccc1)-c1ccccc1	22411063	Ivnitski-Steele_2008	reported by Montanari_2014	INACTIVE	0
1008	Clc1ccc(cc1)-c1nn2c(N=C(C=C2N2CCN(CC2)C(=O)c2ccoc2)c2occc2)c1	99361153	Ivnitski-Steele_2010	reported by Montanari_2014	INHIBITOR	1
1009	Clc1ccc(cc1)C(=O)Nc1ccccc1C(=O)Nc1ccc(cc1)CCO	20	Marighetti_2013	reported by Montanari_2014	INHIBITOR	1
1010	Clc1ccc(cc1)C(=O)n1c2c(cc(OC)cc2)c(CC(=O)[O-])c1C	Indomethacin	Matsson_2007	reported by Montanari_2014	INACTIVE	0
1011	Clc1ccc(cc1)C(=O)n1c2c(cc(OC)cc2)c(CC(OCC(=O)[O-])=O)c1C	acemetacin	Saito_2006	reported by Montanari_2014	INACTIVE	0
1012	Clc1ccc(cc1)[C@H]([NH+]1CC[NH+](CC1)Cc1cc(ccc1)C)c1ccccc1	Meclizine	Matsson_2007	reported by Montanari_2014	INACTIVE	0
1013	Clc1ccc(cc1)C1(O)CC[NH+](CC1)CCC(C(=O)N(C)C)(c1ccccc1)c1ccccc1	Loperamide	Matsson_2007	reported by Montanari_2014	INHIBITOR	1
1014	Clc1ccc(cc1)C1(O)CC[NH+](CC1)CCCC(=O)c1ccc(F)cc1	Haloperidol	Wang_2008	reported by Montanari_2014	INACTIVE	0
1015	Clc1ccc(cc1)\C=C\C(=O)c1c2c(ccc1O)cccc2	136929455	Juvale_2012	reported by Montanari_2014	INACTIVE	0
1016	Clc1ccc(cc1)\C=C\C(=O)c1cc(OC)c(OC)cc1	136923016	Juvale_2012	reported by Montanari_2014	INHIBITOR	1
1017	Clc1ccc(cc1)\C=C\C(=O)c1ccc(OC)cc1O	103567050	Juvale_2012	reported by Montanari_2014	INHIBITOR	1
1018	Clc1ccc(cc1)\C=C\C(=O)c1ccc2c(cccc2)c1O	136926280	Juvale_2012	reported by Montanari_2014	INACTIVE	0
1019	Clc1ccc(cc1[N+](=O)[O-])C=1NC(=O)/C(/N=1)=C/c1ccc(N(C)C)cc1	24791387	Ivnitski-Steele_2008	reported by Montanari_2014	INACTIVE	0
1020	Clc1ccc(nc1C(=O)Nc1cc(ccc1Cl)C(F)(F)F)-n1nc(cc1C)C	22409793	Ivnitski-Steele_2008	reported by Montanari_2014	INACTIVE	0
1021	Clc1cccc(Cl)c1S(=O)(=O)NCCC(OCC(=O)c1cc(C)c(cc1C)C)=O	22410748	Ivnitski-Steele_2008	reported by Montanari_2014	INACTIVE	0
1022	Clc1cccc(F)c1-c1noc(C)c1C(=O)N[C@H]1[C@H]2SC(C)(C)[C@@H](N2C1=O)C(=O)[O-]	Flucloxacillin	Matsson_2009	reported by Montanari_2014	INACTIVE	0
1023	Clc1cccc(F)c1CN1C(=O)/C(/SC1=O)=C\c1oc(N2CCOCC2)cc1	14743034	Ivnitski-Steele_2008	reported by Montanari_2014	INACTIVE	0
1024	Clc1ccccc1-c1n2c(S\C(=C/c3ccc(N(CC)CC)cc3)\C2=O)nn1	14733849	Ivnitski-Steele_2008	reported by Montanari_2014	INACTIVE	0
1025	Clc1ccccc1CSC1=Nc2nc3CCCCc3cc2C(=O)N1CC	17514728	Ivnitski-Steele_2008	reported by Montanari_2014	INACTIVE	0
1026	Clc1ccccc1\C=C\C(=O)c1c(OC)cc(OC)cc1O	103558945	Juvale_2012	reported by Montanari_2014	INHIBITOR	1
1027	Clc1ccccc1\C=C\C(=O)c1c2c(ccc1O)cccc2	136923018	Juvale_2012	reported by Montanari_2014	INHIBITOR	1
1028	Clc1ccccc1\C=C\C(=O)c1cc(C2CC[NH+](CC2)CC)c(OC)cc1OC	103568940	Liu_2008	reported by Montanari_2014	INHIBITOR	1
1029	Clc1ccccc1\C=C\C(=O)c1cc(OC)c(OC)cc1	136939283	Juvale_2012	reported by Montanari_2014	INHIBITOR	1
1030	Clc1ccccc1\C=C\C(=O)c1ccc(OC)cc1O	103567053	Juvale_2012	reported by Montanari_2014	INHIBITOR	1
1031	Clc1ccccc1\C=C\C(=O)c1ccc2c(cccc2)c1O	136929453	Juvale_2012	reported by Montanari_2014	INACTIVE	0
1032	Clc1ccccc1\C=C\C(=O)c1ccccc1	103597135	Juvale_2012	reported by Montanari_2014	INACTIVE	0
1033	Clc1nc(C(=O)\N=C(\N)/N)c(nc1N)N	Amiloride	Matsson_2007	reported by Montanari_2014	INACTIVE	0
1034	Clc1nc(NCCc2ccccc2)c2c(n1)n(nc2)C	NSC19139	Henrich_2007	reported by Montanari_2014	INHIBITOR	1
1035	Clc1nc(O)n(c1C=O)-c1ccccc1	24804288	Ivnitski-Steele_2008	reported by Montanari_2014	INACTIVE	0
1036	Clc1nc(nc(n1)NCCO)Nc1ccc([N+](=O)[O-])cc1	24817134	Ivnitski-Steele_2008	reported by Montanari_2014	INHIBITOR	1
1037	Clc1sc(cc1)C(=O)N(CCCCN1C(=O)c2c(cccc2)C1=O)c1ccc(cc1)C	17506365	Ivnitski-Steele_2008	reported by Montanari_2014	INACTIVE	0
1038	FC(F)(F)C[N@@H+](C(C)C)CCN1c2c(-c3c(cc(OC)c(OC)c3)C1=O)c[nH+]c1c2cc2OCOc2c1	103646874	Feng_2008	reported by Montanari_2014	INHIBITOR	1
1039	FC(F)(F)C[N@H+](CCN1c2c(-c3c(cc(OC)c(OC)c3)C1=O)c[nH+]c1c2cc2OCOc2c1)C	103646812	Feng_2008	reported by Montanari_2014	INHIBITOR	1
1040	FC(F)(F)C[N@H+](CCN1c2c(-c3c(cc(OC)c(OC)c3)C1=O)c[nH+]c1c2cc2OCOc2c1)CC	103646813	Feng_2008	reported by Montanari_2014	INHIBITOR	1
1041	FC(F)(F)c1c2c(nc(O)c1)n(nc2C)-c1nc(cc(n1)C)C	14744220	Ivnitski-Steele_2008	reported by Montanari_2014	INACTIVE	0
1042	FC(F)(F)c1cc(NC(=O)CNC(=O)c2ccccc2)ccc1	17433069	Ivnitski-Steele_2008	reported by Montanari_2014	INACTIVE	0
1043	FC(F)(F)c1cc(Nc2nc(nc3c2cccc3)-c2ccccc2)ccc1	16	phenylquinazolines_Juvale_2012	reported by Montanari_2014	INHIBITOR	1
1044	FC(F)(F)c1cc(O)c2c(Nc3c(cccc3)C2=O)c1	2d	acridones_Boumendjel_2007	reported by Montanari_2014	INACTIVE	0
1045	FC(F)(F)c1cc(OC)c2c(Nc3c(cccc3)C2=O)c1	1e	acridones_Boumendjel_2007	reported by Montanari_2014	INHIBITOR	1
1046	FC(F)(F)c1cc(ccc1)C1(O)CCN(CC1)c1nnc(cc1)-c1ccccc1	846725	Ivnitski-Steele_2008	reported by Montanari_2014	INACTIVE	0
1047	FC(F)(F)c1cc(ccc1)C1=Nc2n(nc(c2)-c2cc(OC)ccc2)C(N2CCN(CC2)C(=O)c2ccoc2)=C1	97301787	Ivnitski-Steele_2010	reported by Montanari_2014	INHIBITOR	1
1048	FC(F)(F)c1ccc(NC[C@H](O)COc2ccccc2C(=O)CCc2ccccc2)cc1	5c	Cramer_2007	reported by Montanari_2014	INHIBITOR	1
1049	FC(F)(F)c1ccc(Nc2nc(nc3c2cccc3)-c2ccccc2)cc1	17	phenylquinazolines_Juvale_2012	reported by Montanari_2014	INHIBITOR	1
1050	FC(F)(F)c1ccc(cc1)-c1oc(O)c(n1)\C=C\1/c2c(N=C/1C)cccc2	14744491	Ivnitski-Steele_2008	reported by Montanari_2014	INACTIVE	0
1051	FC(F)(F)c1ccc(cc1)C(=O)Nc1ccccc1C(=O)Nc1ccc(cc1)CCO	22	Marighetti_2013	reported by Montanari_2014	INHIBITOR	1
1052	FC(F)(F)c1nc(N2CCN(CC2)C(=O)c2occc2)c2nnn(c2n1)Cc1ccccc1	844549	Ivnitski-Steele_2008	reported by Montanari_2014	INACTIVE	0
1053	FC(F)(F)c1nn(cc1)CC(=O)N=Nc1c2c(n(C(C)C)c1O)cccc2	22410791	Ivnitski-Steele_2008	reported by Montanari_2014	INACTIVE	0
1054	FC(F)Oc1ccc(cc1)/C(=N/NC(=O)COc1ccc(cc1)CC)/C	22405788	Ivnitski-Steele_2008	reported by Montanari_2014	INACTIVE	0
1055	FC1(F)[C@H]2[C@@H]1c1c(cccc1)C([NH+]1CC[NH+](CC1)C[C@@H](O)COc1c3c(nccc3)ccc1)c1c2cccc1	LY335979	Weiss_2007	reported by Montanari_2014	INACTIVE	0
1056	FC1=CNC(=O)NC1=O	5-fluorouracil	Saito_2006	reported by Montanari_2014	INACTIVE	0
1057	F[C@@]12[C@H]([C@@H]3C[C@@H](C)[C@](O)(C(=O)CO)[C@]3(C[C@@H]1O)C)CCC1=CC(=O)C=C[C@@]12C	dexamethasone	Saito_2006	reported by Montanari_2014	INACTIVE	0
1058	F[C@@]12[C@H]([C@@H]3C[C@H](C)[C@](O)(C(=O)CO)[C@]3(C[C@@H]1O)C)CCC1=CC(=O)C=C[C@@]12C	betamethasone	Saito_2006	reported by Montanari_2014	INACTIVE	0
1059	Fc1c(N2C[C@H]([NH2+][C@H](C2)C)C)c(F)c2N(C=C(C(=O)[O-])C(=O)c2c1N)C1CC1	Sparfloxacin	Matsson_2009	reported by Montanari_2014	INACTIVE	0
1060	Fc1cc(F)ccc1NC(=O)Nc1ccc(cc1)C(=O)[O-]	24791948	Ivnitski-Steele_2008	reported by Montanari_2014	INACTIVE	0
1061	Fc1cc(ccc1)-c1nn2c(N=C(C)C(C)=C2N2CCN(CC2)C(=O)C)c1	85240380	Njus_2010	reported by Montanari_2014	INHIBITOR	1
1062	Fc1cc(ccc1)-c1nn2c(N=C(C=C2N2CCN(CC2)C(=O)C)C)c1	85240389	Ivnitski-Steele_2010	reported by Montanari_2014	INHIBITOR	1
1063	Fc1cc(ccc1)-c1nn2c(N=C(C=C2N2CCN(CC2)C(=O)[C@@H]2OCCC2)C)c1	85240372	Ivnitski-Steele_2010	reported by Montanari_2014	INHIBITOR	1
1064	Fc1cc(ccc1)-c1nn2c(N=C3C(CCCC3)=C2N2CCN(CC2)C(=O)[C@@H]2OCCC2)c1	85240386	Ivnitski-Steele_2010	reported by Montanari_2014	INHIBITOR	1
1065	Fc1cc(ccc1)C1=Nc2n(nc(c2)-c2ccccc2)C(N2CCN(CC2)C(=O)c2ccoc2)=C1	99361145	Ivnitski-Steele_2010	reported by Montanari_2014	INHIBITOR	1
1066	Fc1cc(ccc1)\C=N\NC(=O)Cc1c2c([nH]c1)cccc2	17432057	Ivnitski-Steele_2008	reported by Montanari_2014	INACTIVE	0
1067	Fc1cc(ccc1-c1ccccc1)[C@@H](C(=O)[O-])C	Flurbiprofen	Matsson_2007	reported by Montanari_2014	INACTIVE	0
1068	Fc1cc2c3N(C=C(C(=O)[O-])C2=O)[C@@H](COc3c1N1CC[NH+](CC1)C)C	Ofloxacin	Matsson_2009	reported by Montanari_2014	INACTIVE	0
1069	Fc1cc2onc(c2cc1)C1CC[NH+](CC1)CCC=1C(=O)N2C(=NC=1C)[C@@H](O)CCC2	Paliperidone	Wang_2008	reported by Montanari_2014	INACTIVE	0
1070	Fc1ccc(N2CC[NH+](CC2)C[C@H](O)COc2ccccc2C(=O)CCc2ccccc2)cc1	1f	Cramer_2007	reported by Montanari_2014	INHIBITOR	1
1071	Fc1ccc(N2CC[NH+](CC2)Cc2cc(ccc2OC)\C=N\NC(=O)c2cc(OC)c(O)cc2)cc1	24815249	Ivnitski-Steele_2008	reported by Montanari_2014	INACTIVE	0
1072	Fc1ccc(N2CC[NH+](CC2)Cc2cc(ccc2OC)\C=N\NC(=O)c2cccnc2)cc1	24812057	Ivnitski-Steele_2008	reported by Montanari_2014	INACTIVE	0
1073	Fc1ccc(NC(=O)NC2CC[NH+](CC2)Cc2nnnn2Cc2occc2)cc1	846390	Ivnitski-Steele_2008	reported by Montanari_2014	INACTIVE	0
1074	Fc1ccc(NC(=O)c2c3n(C=CC=C3)c(CCc3ccncc3)c2C)cc1	22407563	Ivnitski-Steele_2008	reported by Montanari_2014	INACTIVE	0
1075	Fc1ccc(Nc2nc(nc3c2cccc3)-c2ccccc2)cc1[N+](=O)[O-]	14	phenylquinazolines_Juvale_2012	reported by Montanari_2014	INHIBITOR	1
1076	Fc1ccc(cc1)-c1nn2c(N=C(C)C(C)=C2N2CCN(CC2)C(=O)C)c1	85240384	Ivnitski-Steele_2010	reported by Montanari_2014	INACTIVE	0
1077	Fc1ccc(cc1)-c1nn2c(N=C(C=C2N2CCN(CC2)C(=O)c2occc2)C)c1	85240367	Njus_2010	reported by Montanari_2014	INHIBITOR	1
1078	Fc1ccc(cc1)-c1nn2c(N=C3C(CCC3)=C2N2CCN(CC2)C(=O)c2occc2)c1	85240382	Ivnitski-Steele_2010	reported by Montanari_2014	INHIBITOR	1
1079	Fc1ccc(cc1)C(=O)[C@@H]1[C@H](NC(=O)N[C@@]1(O)C(F)(F)F)c1oc(cc1)-c1ccccc1[N+](=O)[O-]	17504141	Ivnitski-Steele_2008	reported by Montanari_2014	INACTIVE	0
1080	Fc1ccc(cc1)C1=Nc2n(nc(c2)-c2ccccc2)C(N2CCN(CC2)C(=O)c2ccoc2)=C1	99361149	Ivnitski-Steele_2010	reported by Montanari_2014	INHIBITOR	1
1081	Fc1ccc(cc1)CNC(=O)C=1OC(=O)c2c(cccc2)C=1c1ccc(cc1)C	17510587	Ivnitski-Steele_2008	reported by Montanari_2014	INACTIVE	0
1082	Fc1ccc(cc1)Cn1c2c(nc1NC1CC[NH+](CC1)CCc1ccc(OC)cc1)cccc2	Astemizole	Matsson_2007	reported by Montanari_2014	INHIBITOR	1
1083	Fc1ccccc1C(=O)N\N=C\c1cc(C[NH+]2CCN(CC2)c2ccc(F)cc2)c(OC)cc1	17510314	Ivnitski-Steele_2008	reported by Montanari_2014	INACTIVE	0
1084	Fc1ccccc1C1=Nc2n(nc(c2)-c2ccccc2)C(N2CCN(CC2)C(=O)c2ccoc2)=C1	99361147	Ivnitski-Steele_2010	reported by Montanari_2014	INHIBITOR	1
1085	Fc1ccccc1NC(=O)Nc1ccc([N+](=O)[O-])cc1C	24795761	Ivnitski-Steele_2008	reported by Montanari_2014	INACTIVE	0
1086	Ic1cc(cc(I)c1OCC[NH+](CC)CC)C(=O)c1c2c(oc1CCCC)cccc2	Amiodarone	Matsson_2007	reported by Montanari_2014	INHIBITOR	1
1087	Ic1cc(cc(I)c1Oc1cc(I)c(O)c(I)c1)C[C@H]([NH3+])C(=O)[O-]	Levothyroxine	Matsson_2007	reported by Montanari_2014	INACTIVE	0
1088	N#C\C(\C#N)=C\1/CC[C@H]2C(C=C(N3CCCCC3)CC2)=C/1	22409753	Ivnitski-Steele_2008	reported by Montanari_2014	INHIBITOR	1
1089	N#C\C(\C#N)=C\1/CC[C@H]2C(C=C(N3CCCCCC3)CC2)=C/1	22405113	Ivnitski-Steele_2008	reported by Montanari_2014	INACTIVE	0
1090	[NH+]1(CCN(CC1)C=1CC[C@@H]2C(C=1)=C/C(/CC2)=C(/C#N)\C#N)C	24826438	Ivnitski-Steele_2008	reported by Montanari_2014	INHIBITOR	1
1091	[NH+]1(CCN(CC1)C=1CC[C@@H]2C(C=1)=C/C(/CC2)=C(/C#N)\C#N)CC	24826744	Ivnitski-Steele_2008	reported by Montanari_2014	INACTIVE	0
1092	N(CC)(CC)C=1CC[C@H]2C(C=1)=C/C(/CC2)=C(/C#N)\C#N	22405114	Ivnitski-Steele_2008	reported by Montanari_2014	INHIBITOR	1
1093	[NH2+](CCCC12CCC(c3c1cccc3)c1c2cccc1)C	Maprotiline	Matsson_2007	reported by Montanari_2014	INACTIVE	0
1094	[NH2+](CCCN1c2c(CCc3c1cccc3)cccc2)C	Desipramine	Matsson_2007	reported by Montanari_2014	INACTIVE	0
1095	[NH+](CC\C=C/1\c2c(CCc3c\1cccc3)cccc2)(C)C	Amitriptyline	Matsson_2009	reported by Montanari_2014	INACTIVE	0
1096	[NH3+]C12CC3CC(C1)CC(C2)C3	Amantadine	Matsson_2007	reported by Montanari_2014	INACTIVE	0
1097	[NH3+]C\C=C(\C)/C	prenylamine	Saito_2006	reported by Montanari_2014	INACTIVE	0
1098	O(C(=O)[C@@H](CO)c1ccccc1)C1C[C@@H]2[NH+]([C@H](C1)CC2)C	Atropine	Matsson_2007	reported by Montanari_2014	INACTIVE	0
1099	O(C(=O)C)c1c2c([nH]c1\C=C(\C(=O)N)/C#N)cccc2	22403366	Ivnitski-Steele_2008	reported by Montanari_2014	INACTIVE	0
1100	O(C(=O)C)c1ccc(cc1)C(=O)Nc1ccccc1C(=O)Nc1ccc(cc1)CCO	23	Marighetti_2013	reported by Montanari_2014	INHIBITOR	1
1101	O(C(=O)C)c1ccccc1C(=O)[O-]	acetylsalicylic acid	Saito_2006	reported by Montanari_2014	INACTIVE	0
1102	O(C(=O)C1CCCCC1)[C@@H]1C[C@H](N(C1)C(OC(C)(C)C)=O)C(=O)N[C@@H](CCCCNC(OCc1ccccc1)=O)C(OC(C)(C)C)=O	123100566	Arnaud_2010	reported by Montanari_2014	INACTIVE	0
1103	O(C(=O)C=1[C@@H](C(C(OC)=O)=C(NC=1C)C)c1cc([N+](=O)[O-])ccc1)CC	Nitrendipine	Matsson_2007	reported by Montanari_2014	INHIBITOR	1
1104	O(C(=O)C=1C(C(C(OC)=O)=C(NC=1C)C)c1ccccc1[N+](=O)[O-])C	nifedipine	Saito_2006	reported by Montanari_2014	INACTIVE	0
1105	O(C(=O)C=1[C@@H](C(C(OC)=O)=C(NC=1C)C)c1ccccc1[N+](=O)[O-])CC(C)C	Nisoldipine	Pan_2013	reported by Montanari_2014	INACTIVE	0
1106	O(C(=O)Cc1ccccc1)[C@@H]1C[C@H](N(C1)C(OC(C)(C)C)=O)C(=O)N[C@@H](CCCCNC(OCc1ccccc1)=O)C(OC(C)(C)C)=O	123089053	Arnaud_2010	reported by Montanari_2014	INACTIVE	0
1107	O(C(=O)N[C@@H](C(C)(C)C)C(=O)N[C@H]([C@@H](O)C[N@](NC(=O)[C@@H](NC(OC)=O)C(C)(C)C)Cc1ccc(cc1)-c1ncccc1)Cc1ccccc1)C	Atazanavir	Weiss_2007	reported by Montanari_2014	INACTIVE	0
1108	O(C(=O)[C@H]1N(C(=O)c2ccc(cc2)\C=N\O[C@@H](C)c2nnn(c2)[C@@H](Cc2ccccc2)CO)[C@@H]([C@H](CC1)C)c1ccc(cc1)C)C	14728608	Ivnitski-Steele_2008	reported by Montanari_2014	INACTIVE	0
1109	O(C(=O)c1cc(NC(=O)CC)ccc1)Cc1cc([N+](=O)[O-])ccc1	24787820	Ivnitski-Steele_2008	reported by Montanari_2014	INACTIVE	0
1110	O(C(=O)c1cc(NC(=O)c2nc3c(nc2)cccc3)ccc1)CC	4244513	Ivnitski-Steele_2008	reported by Montanari_2014	INHIBITOR	1
1111	O(C(=O)c1cc([N+](=O)[O-])c(N2CCCC2)cc1)Cc1ccc(cc1)C#N	22407009	Ivnitski-Steele_2008	reported by Montanari_2014	INACTIVE	0
1112	O(C(=O)c1cc([N+](=O)[O-])ccc1)c1cc(\N=C/2\C(n3nnc4c3cccc4)=C(O)c3c(cccc3)C\2=O)ccc1	14741973	Ivnitski-Steele_2008	reported by Montanari_2014	INACTIVE	0
1113	O(C(=O)c1ccc(NC(=O)C)cc1)CC(=O)c1cc([N+](=O)[O-])ccc1	17505269	Ivnitski-Steele_2008	reported by Montanari_2014	INACTIVE	0
1114	O(C(=O)c1ccc(NC(OCCCC)=O)cc1)CCC	7977793	Ivnitski-Steele_2008	reported by Montanari_2014	INACTIVE	0
1115	O(C(=O)c1ccccc1[N+](=O)[O-])c1cc(\N=C/2\C(n3nnc4c3cccc4)=C(O)c3c(cccc3)C\2=O)ccc1	14741755	Ivnitski-Steele_2008	reported by Montanari_2014	INACTIVE	0
1116	O(C(C)C)c1ccc(cc1)C(=O)Nc1ccccc1C(=O)Nc1ccc(cc1)CCO	25	Marighetti_2013	reported by Montanari_2014	INHIBITOR	1
1117	O([C@@H](c1ccccc1C)c1ccccc1)CC[NH+](C)C	Orphenadrine	Matsson_2007	reported by Montanari_2014	INACTIVE	0
1118	O(C)C1=CC=C2c3c(cc(OC)c(OC)c3OC)CC[C@H](NC(=O)C)C2=CC1=O	Colchicine	Matsson_2009	reported by Montanari_2014	INACTIVE	0
1119	O(C)c1c(NC(=O)c2cc3c(nc2)cccc3)cc(cc1OC)C(=O)Nc1ccc(cc1)CC[N@@H+]1CCc2cc(OC)c(OC)cc2C1	103591276	Kuhnle_2009	reported by Montanari_2014	INHIBITOR	1
1120	O(C)c1c(OC)cc(cc1OC)C(=O)C(=O)N1CCCC[C@H]1C(OC(CCCc1cccnc1)CCCc1cccnc1)=O	VX-710	Mao_2004	reported by Montanari_2014	INHIBITOR	1
1121	O(C)c1c(OC)cc(cc1OC)Cc1cnc(nc1N)N	Trimethoprim	Matsson_2007	reported by Montanari_2014	INACTIVE	0
1122	O(C)c1c(OC)cc(cc1OC)\C=C/1\CCc2c(cccc2)C\1=O	22411125	Ivnitski-Steele_2008	reported by Montanari_2014	INACTIVE	0
1123	O(C)c1c(cccc1OC)CNc1ccccc1CCc1cc(OC)ccc1	103578561	Colabufo_2008_ext	reported by Montanari_2014	INHIBITOR	1
1124	O(C)c1c(cccc1OC)COc1ccccc1CCc1cc(OC)ccc1	103578069	Colabufo_2008_ext	reported by Montanari_2014	INACTIVE	0
1125	O(C)c1c(cccc1OC)COc1ccccc1CCc1ccccc1	103578071	Colabufo_2008	reported by Montanari_2014	INACTIVE	0
1126	O(C)c1c2c(Nc3c(cccc3)C2=O)cc(OC)c1	1c	acridones_Boumendjel_2007	reported by Montanari_2014	INHIBITOR	1
1127	O(C)c1c2c(Nc3c(cccc3)C2=O)ccc1	1a	acridones_Boumendjel_2007	reported by Montanari_2014	INHIBITOR	1
1128	O(C)c1c2c(Nc3c(cccc3)C2=O)ccc1OC	1d	acridones_Boumendjel_2007	reported by Montanari_2014	INACTIVE	0
1129	O(C)c1cc(C(=O)Nc2ccc(cc2)CC[N@@H+]2CCc3cc(OC)c(OC)cc3C2)c([N+](=O)[O-])cc1OC	103569328	Pick_2008	reported by Montanari_2014	INACTIVE	0
1130	O(C)c1cc(C(=O)Nc2ccc(cc2)CCO)c(NC(=O)c2ccc([N+](=O)[O-])cc2)cc1	9	Marighetti_2013	reported by Montanari_2014	INHIBITOR	1
1131	O(C)c1cc(C(=O)Nc2ccc(cc2)CCO)c(NC(=O)c2ccc([N+](=O)[O-])cc2)cc1OC	7	Marighetti_2013	reported by Montanari_2014	INHIBITOR	1
1132	O(C)c1cc(N2CCN(CC2)c2nc(nc3c2cccc3)-c2ccccc2)ccc1	22	phenylquinazolines_Juvale_2012	reported by Montanari_2014	INHIBITOR	1
1133	O(C)c1cc(NC(=O)Nc2cc[nH+]cc2)ccc1	24797453	Ivnitski-Steele_2008	reported by Montanari_2014	INACTIVE	0
1134	O(C)c1cc(NC(=O)c2ccc([N+](=O)[O-])cc2)c(cc1)C(=O)Nc1ccc(cc1)CCO	8	Marighetti_2013	reported by Montanari_2014	INHIBITOR	1
1135	O(C)c1cc(O)c(cc1)C(=O)\C=C\c1cc(OC)ccc1	103566963	Juvale_2012	reported by Montanari_2014	INHIBITOR	1
1136	O(C)c1cc(O)c(cc1)C(=O)\C=C\c1ccc(OC)cc1	103519909	Juvale_2012	reported by Montanari_2014	INHIBITOR	1
1137	O(C)c1cc(O)c(cc1)C(=O)\C=C\c1ccccc1	103323400	Juvale_2012	reported by Montanari_2014	INACTIVE	0
1138	O(C)c1cc(O)c2c(Nc3c(cccc3)C2=O)c1	2c	acridones_Boumendjel_2007	reported by Montanari_2014	INACTIVE	0
1139	O(C)c1cc(OC)c(cc1C1CC[NH+](CC1)CC)C(=O)\C=C\c1ccccc1	103568863	Liu_2008	reported by Montanari_2014	INHIBITOR	1
1140	O(C)c1cc(OC)cc(O)c1C(=O)\C=C\c1cc(OC)c(OC)cc1	103529402	Juvale_2012	reported by Montanari_2014	INHIBITOR	1
1141	O(C)c1cc(OC)cc(O)c1C(=O)\C=C\c1ccc(OC)cc1	103529401	Juvale_2012	reported by Montanari_2014	INHIBITOR	1
1142	O(C)c1cc(OC)ccc1C(=O)\C=C\c1cc(OC)c(OC)cc1	136945676	Juvale_2012	reported by Montanari_2014	INHIBITOR	1
1143	O(C)c1cc(OC)ccc1C(=O)\C=C\c1ccc(OC)cc1	103213680	Juvale_2012	reported by Montanari_2014	INHIBITOR	1
1144	O(C)c1cc(OC)ccc1NC(=O)C[NH+]1CC[NH+](CC1)C1c2c(-c3c1cccc3)cccc2	4245796	Ivnitski-Steele_2008	reported by Montanari_2014	INACTIVE	0
1145	O(C)c1cc(OC)ccc1\C=C\C(=O)c1ccc(N2CC[NH2+]CC2)cc1	103543843	Liu_2008	reported by Montanari_2014	INACTIVE	0
1146	O(C)c1cc(ccc1)CCc1ccccc1NCc1cc(OC)ccc1	103577979	Colabufo_2008	reported by Montanari_2014	INHIBITOR	1
1147	O(C)c1cc(ccc1)\C=C(\C(OCC(=O)N[C@@H]1CCC[C@@H](C)[C@H]1C)=O)/c1ccccc1	22403643	Ivnitski-Steele_2008	reported by Montanari_2014	INACTIVE	0
1148	O(C)c1cc(ccc1)\C=C\C(=O)c1c2c(ccc1O)cccc2	136936131	Juvale_2012	reported by Montanari_2014	INHIBITOR	1
1149	O(C)c1cc(ccc1)\C=C\C(=O)c1ccc(O)cc1O	103699248	Juvale_2012	reported by Montanari_2014	INHIBITOR	1
1150	O(C)c1cc(ccc1)\C=C\C(=O)c1ccc2c(cccc2)c1O	136939285	Juvale_2012	reported by Montanari_2014	INHIBITOR	1
1151	O(C)c1cc(ccc1OC)C(=O)Nc1ccc(cc1)CC[N@@H+]1CCc2cc(OC)c(OC)cc2C1	103569361	Pick_2008	reported by Montanari_2014	INACTIVE	0
1152	O(C)c1cc(ccc1OC)C(=O)Nc1ccccc1C(=O)Nc1ccc(cc1)CC[N@@H+]1CCc2cc(OC)c(OC)cc2C1	103545267	Pick_2008	reported by Montanari_2014	INHIBITOR	1
1153	O(C)c1cc(ccc1OC)C(=O)Nc1ccccc1C(=O)Nc1ccc(cc1)CCO	27	Marighetti_2013	reported by Montanari_2014	INHIBITOR	1
1154	O(C)c1cc(ccc1OC)C(=O)\C=C\c1cc(OC)c(OC)cc1	103719424	Juvale_2012	reported by Montanari_2014	INHIBITOR	1
1155	O(C)c1cc(ccc1OC)C(=O)\C=C\c1ccc(OC)cc1	103213714	Juvale_2012	reported by Montanari_2014	INHIBITOR	1
1156	O(C)c1cc(ccc1OC)C(Oc1cc2c3N(C(=O)C2=O)C(C=C(c3c1)C)(C)C)=O	17506947	Ivnitski-Steele_2008	reported by Montanari_2014	INACTIVE	0
1157	O(C)c1cc(ccc1OC)[C@@H]1C=2C(=Nc3c1c1c(nccc1)cc3)CCCC=2O	24809035	Ivnitski-Steele_2008	reported by Montanari_2014	INACTIVE	0
1158	O(C)c1cc(ccc1OC)CC[N@H+](CCC[C@](C(C)C)(C#N)c1cc(OC)c(OC)cc1)C	103583439	Pick_2008	reported by Montanari_2014	INACTIVE	0
1159	O(C)c1cc(ccc1OC)CCNC(=O)c1c2Nc3c(ccc(OC)c3)C(=O)c2ccc1	4d	acridones_Boumendjel_2007	reported by Montanari_2014	INHIBITOR	1
1160	O(C)c1cc(ccc1OC)CCNC(=O)c1c2Nc3c(cccc3)C(=O)c2ccc1	4b	acridones_Boumendjel_2007	reported by Montanari_2014	INHIBITOR	1
1161	O(C)c1cc(ccc1OC)CCNc1cc(N2CCN(CC2)C(=O)c2ccc(cc2)C)ccc1[N+](=O)[O-]	17511569	Ivnitski-Steele_2008	reported by Montanari_2014	INACTIVE	0
1162	O(C)c1cc(ccc1OC)CNc1ccccc1CCc1cc(OC)ccc1	103578562	Colabufo_2008_ext	reported by Montanari_2014	INHIBITOR	1
1163	O(C)c1cc(ccc1OC)Cc1nccc2c1cc(OC)c(OC)c2	Papaverine	Pan_2013	reported by Montanari_2014	INACTIVE	0
1164	O(C)c1cc(ccc1OC)\C=C\C(=O)c1c2c(ccc1O)cccc2	136926282	Juvale_2012	reported by Montanari_2014	INHIBITOR	1
1165	O(C)c1cc(ccc1OC)\C=C\C(=O)c1ccc(O)cc1O	103699249	Juvale_2012	reported by Montanari_2014	INHIBITOR	1
1166	O(C)c1cc(ccc1OC)\C=C\C(=O)c1ccc2c(cccc2)c1O	136939284	Juvale_2012	reported by Montanari_2014	INHIBITOR	1
1167	O(C)c1cc(ccc1OC)\C=C\C(=O)c1ccccc1O	103529383	Juvale_2012	reported by Montanari_2014	INHIBITOR	1
1168	O(C)c1cc(ccc1OC)\C=C\C(OCC(=O)NCCc1ccc(OC)cc1)=O	22407558	Ivnitski-Steele_2008	reported by Montanari_2014	INHIBITOR	1
1169	O(C)c1cc2CC[N@H+](Cc2cc1OC)CCc1ccc(NC(=O)Nc2ccc(N)cc2)cc1	103595010	Pick_2010	reported by Montanari_2014	INACTIVE	0
1170	O(C)c1cc2CC[N@H+](Cc2cc1OC)CCc1ccc(NC(=O)Nc2ccc([N+](=O)[O-])cc2)cc1	103594942	Pick_2010	reported by Montanari_2014	INHIBITOR	1
1171	O(C)c1cc2CC[N@H+](Cc2cc1OC)CCc1ccc(NC(=O)Nc2ccccc2N)cc1	103594943	Pick_2010	reported by Montanari_2014	INACTIVE	0
1172	O(C)c1cc2CC[N@H+](Cc2cc1OC)CCc1ccc(NC(=O)Nc2ccccc2[N+](=O)[O-])cc1	103594881	Pick_2010	reported by Montanari_2014	INACTIVE	0
1173	O(C)c1cc2CC[N@H+](Cc2cc1OC)CCc1ccc(NC(=O)c2c3c(ncc2)cccc3)cc1	103569329	Pick_2008	reported by Montanari_2014	INACTIVE	0
1174	O(C)c1cc2CC[N@H+](Cc2cc1OC)CCc1ccc(NC(=O)c2cc(NC(=O)c3cc4c(nc3)cccc4)c(cc2)C(OC)=O)cc1	103591268	Kuhnle_2009	reported by Montanari_2014	INHIBITOR	1
1175	O(C)c1cc2CC[N@H+](Cc2cc1OC)CCc1ccc(NC(=O)c2cc(NC(=O)c3cc4c(nc3)cccc4)c(cc2)C)cc1	103591278	Kuhnle_2009	reported by Montanari_2014	INHIBITOR	1
1176	O(C)c1cc2CC[N@H+](Cc2cc1OC)CCc1ccc(NC(=O)c2cc(NC(=O)c3cc4c(nc3)cccc4)cc(OC)c2)cc1	103591277	Kuhnle_2009	reported by Montanari_2014	INHIBITOR	1
1177	O(C)c1cc2CC[N@H+](Cc2cc1OC)CCc1ccc(NC(=O)c2cc(NC(=O)c3cc4c(nccc4)cc3)c(cc2)C(=O)[O-])cc1	131273183	Ochoa-Puentes_2011	reported by Montanari_2014	INACTIVE	0
1178	O(C)c1cc2CC[N@H+](Cc2cc1OC)CCc1ccc(NC(=O)c2cc(NC(=O)c3cc4c(nccc4)cc3)c(cc2)C(OC)=O)cc1	103591271	Kuhnle_2009	reported by Montanari_2014	INHIBITOR	1
1179	O(C)c1cc2CC[N@H+](Cc2cc1OC)CCc1ccc(NC(=O)c2cc(NC(=O)c3cccnc3)c(cc2)C(OC)=O)cc1	103591274	Kuhnle_2009	reported by Montanari_2014	INHIBITOR	1
1180	O(C)c1cc2CC[N@H+](Cc2cc1OC)CCc1ccc(NC(=O)c2cc(NC(=O)c3nc4c(cc3)cccc4)c(cc2)C(=O)[O-])cc1	131275144	Ochoa-Puentes_2011	reported by Montanari_2014	INHIBITOR	1
1181	O(C)c1cc2CC[N@H+](Cc2cc1OC)CCc1ccc(NC(=O)c2cc(NC(=O)c3nc4c(nc3)cccc4)c(cc2)C(OC)=O)cc1	103591270	Kuhnle_2009	reported by Montanari_2014	INHIBITOR	1
1182	O(C)c1cc2CC[N@H+](Cc2cc1OC)CCc1ccc(NC(=O)c2cc(NC(=O)c3ncc(nc3)C)c(cc2)C(OC)=O)cc1	103591272	Kuhnle_2009	reported by Montanari_2014	INHIBITOR	1
1183	O(C)c1cc2CC[N@H+](Cc2cc1OC)CCc1ccc(NC(=O)c2cc(NC(=O)c3nccnc3)c(cc2)C(OC)=O)cc1	103591273	Kuhnle_2009	reported by Montanari_2014	INHIBITOR	1
1184	O(C)c1cc2CC[N@H+](Cc2cc1OC)CCc1ccc(NC(=O)c2cc3c(cc2)cccc3)cc1	103569160	Pick_2008	reported by Montanari_2014	INHIBITOR	1
1185	O(C)c1cc2CC[N@H+](Cc2cc1OC)CCc1ccc(NC(=O)c2cc3c(nc2)cccc3)cc1	103568843	Pick_2008	reported by Montanari_2014	INACTIVE	0
1186	O(C)c1cc2CC[N@H+](Cc2cc1OC)CCc1ccc(NC(=O)c2ccc(N)cc2)cc1	103568919	Pick_2008	reported by Montanari_2014	INACTIVE	0
1187	O(C)c1cc2CC[N@H+](Cc2cc1OC)CCc1ccc(NC(=O)c2ccc([N+](=O)[O-])cc2)cc1	103568953	Pick_2008	reported by Montanari_2014	INHIBITOR	1
1188	O(C)c1cc2CC[N@H+](Cc2cc1OC)CCc1ccc(NC(=O)c2ccccc2)cc1	103587881	Pick_2008	reported by Montanari_2014	INACTIVE	0
1189	O(C)c1cc2CC[N@H+](Cc2cc1OC)CCc1ccc(NC(=O)c2ccccc2N)cc1	103568989	Pick_2008	reported by Montanari_2014	INACTIVE	0
1190	O(C)c1cc2CC[N@H+](Cc2cc1OC)CCc1ccc(NC(=O)c2ccccc2NC(=O)Nc2ccc([N+](=O)[O-])cc2)cc1	103720971	Pick_2010	reported by Montanari_2014	INHIBITOR	1
1191	O(C)c1cc2CC[N@H+](Cc2cc1OC)CCc1ccc(NC(=O)c2ccccc2NC(=O)c2ccc([N+](=O)[O-])cc2)cc1	103720970	Pick_2010	reported by Montanari_2014	INHIBITOR	1
1192	O(C)c1cc2CC[N@H+](Cc2cc1OC)CCc1ccc(NC(=O)c2ccccc2NC(=O)c2ccc(cc2)C)cc1	103569132	Pick_2008	reported by Montanari_2014	INHIBITOR	1
1193	O(C)c1cc2CC[N@H+](Cc2cc1OC)CCc1ccc(NC(=O)c2ccccc2NC(=O)c2ccccc2)cc1	103405685	Pick_2008	reported by Montanari_2014	INHIBITOR	1
1194	O(C)c1cc2CC[N@H+](Cc2cc1OC)CCc1ccc(NC(=O)c2ccccc2[N+](=O)[O-])cc1	103569029	Pick_2008	reported by Montanari_2014	INACTIVE	0
1195	O(C)c1cc2CC[N@H+](Cc2cc1OC)CCc1ccc(NC(=O)c2cccnc2)cc1	103569026	Pick_2008	reported by Montanari_2014	INACTIVE	0
1196	O(C)c1cc2CC[N@H+](Cc2cc1OC)CCc1ccc(NC(=O)c2nc3c(nc2)cccc3)cc1	103569129	Pick_2008	reported by Montanari_2014	INHIBITOR	1
1197	O(C)c1cc2CC[N@H+](Cc2cc1OC)CCc1ccc(NC(=O)c2ncc3c(c2)cccc3)cc1	103569063	Pick_2008	reported by Montanari_2014	INHIBITOR	1
1198	O(C)c1cc2N([C@@H]3[C@@]4([C@H]5[N@H+](CC=C[C@@]5(CC)[C@@H](OC(=O)C)[C@]3(O)C(OC)=O)CC4)c2cc1[C@@]1(c2[nH]c3c(c2CC[N@H+]2C[C@@](O)(C[C@H](C1)C2)CC)cccc3)C(OC)=O)C	vinblastine	Saito_2006	reported by Montanari_2014	INACTIVE	0
1199	O(C)c1cc2N([C@@H]3[C@@]4([C@H]5[N@H+](CC=C[C@@]5(CC)[C@@H](OC(=O)C)[C@]3(O)C(OC)=O)CC4)c2cc1[C@@]1(c2[nH]c3c(c2CC[N@H+]2C[C@@](O)(C[C@H](C1)C2)CC)cccc3)C(OC)=O)C=O	Vincristine	Matsson_2009	reported by Montanari_2014	INACTIVE	0
1200	O(C)c1cc2c(Nc3c(cccc3)C2=O)cc1	1b	acridones_Boumendjel_2007	reported by Montanari_2014	INHIBITOR	1
1201	O(C)c1cc2c([nH]cc2CCNC(=O)C)cc1	melatonin	Saito_2006	reported by Montanari_2014	INACTIVE	0
1202	O(C)c1cc2c(cc(cc2)[C@@H](C(=O)[O-])C)cc1	naproxen	Saito_2006	reported by Montanari_2014	INACTIVE	0
1203	O(C)c1cc2c(nccc2[C@@H](O)[C@H]2[N@H+]3C[C@@H]([C@@H](C2)CC3)C=C)cc1	Quinine	Matsson_2007	reported by Montanari_2014	INACTIVE	0
1204	O(C)c1cc2c(nccc2[C@H](O)[C@@H]2[N@@H+]3C[C@@H]([C@H](C2)CC3)C=C)cc1	quinidine	Saito_2006	reported by Montanari_2014	INACTIVE	0
1205	O(C)c1cc2c(ncnc2Nc2cc(O)ccc2)cc1OC	DTQ	cdkinhib_An_2008	reported by Montanari_2014	INHIBITOR	1
1206	O(C)c1ccc(cc1)-c1nn(cc1\C=C\C(=O)N1CCN(CC1)c1ncccc1)-c1ccccc1	24832853	Ivnitski-Steele_2008	reported by Montanari_2014	INACTIVE	0
1207	O(C)c1ccc(cc1)-c1nn2C=C(C(OCC)=O)C(=Nc2c1)C1CCN(CC1)C(OC(C)(C)C)=O	14734281	Ivnitski-Steele_2008	reported by Montanari_2014	INACTIVE	0
1208	O(C)c1ccc(cc1)-c1nn2c(N=C(C=C2N2CCN(CC2)C(=O)c2ccccc2)c2ccccc2)c1	87350361	Njus_2010	reported by Montanari_2014	INHIBITOR	1
1209	O(C)c1ccc(cc1)C(=O)Cn1nc(nn1)-c1ccccc1NC(=O)C1CC1	853120	Ivnitski-Steele_2008	reported by Montanari_2014	INACTIVE	0
1210	O(C)c1ccc(cc1)CCNC(=O)c1c2Nc3c(ccc(OC)c3)C(=O)c2ccc1	4c	acridones_Boumendjel_2007	reported by Montanari_2014	INHIBITOR	1
1211	O(C)c1ccc(cc1)CCNC(=O)c1c2Nc3c(cccc3)C(=O)c2ccc1	4a	acridones_Boumendjel_2007	reported by Montanari_2014	INHIBITOR	1
1212	O(C)c1ccc(cc1)CN1CCn2nc(cc2C1=O)C(=O)NC(C)C	24821124	Ivnitski-Steele_2008	reported by Montanari_2014	INACTIVE	0
1213	O(C)c1ccc(cc1)\C=C(/OC)\C(=O)N\C=C\c1ccc(O)cc1	103728078	Takada_2010	reported by Montanari_2014	INHIBITOR	1
1214	O(C)c1ccc(cc1)\C=C\C(=O)c1c2c(ccc1O)cccc2	136932709	Juvale_2012	reported by Montanari_2014	INHIBITOR	1
1215	O(C)c1ccc(cc1)\C=C\C(=O)c1ccc(O)cc1O	103449034	Juvale_2012	reported by Montanari_2014	INHIBITOR	1
1216	O(C)c1ccc(cc1)\C=C\C(=O)c1ccc2c(cccc2)c1O	136923017	Juvale_2012	reported by Montanari_2014	INHIBITOR	1
1217	O(C)c1ccc(cc1)\C=C\C(=O)c1ccccc1O	103529376	Juvale_2012	reported by Montanari_2014	INACTIVE	0
1218	O(C)c1ccc(cc1C(=O)Nc1c(cccc1CC)CC)CN1C(=O)c2c(cccc2)C1=O	22402935	Ivnitski-Steele_2008	reported by Montanari_2014	INACTIVE	0
1219	O(C)c1ccc(cc1NC(=O)c1cc2c(nc1)cccc2)C(=O)Nc1ccc(cc1)CC[N@@H+]1CCc2cc(OC)c(OC)cc2C1	103591275	Kuhnle_2009	reported by Montanari_2014	INHIBITOR	1
1220	O(C)c1cccc(-c2nc(N(CC)CC)c3c(n2)cccc3)c1O	860612	Ivnitski-Steele_2008	reported by Montanari_2014	INACTIVE	0
1221	O(C)c1cccc(-c2nc(N3C[C@@H](C[C@H](C3)C)C)c3c(n2)cccc3)c1O	860159	Ivnitski-Steele_2008	reported by Montanari_2014	INACTIVE	0
1222	O(C)c1ccccc1NC(=O)\C(=C\c1cc([N+](=O)[O-])ccc1)\c1ccccc1	17434030	Ivnitski-Steele_2008	reported by Montanari_2014	INACTIVE	0
1223	O(C)c1ccccc1Nc1nc(nc2c1cccc2)-c1ccccc1	7	phenylquinazolines_Juvale_2012	reported by Montanari_2014	INHIBITOR	1
1224	O(C)c1n(nc(c1)C)-c1nc(cc(OC)n1)C	mepirizole	Saito_2006	reported by Montanari_2014	INACTIVE	0
1225	O(CC(=O)N1CCCc2c1cccc2)c1c2c(ccc1)C(=O)N(CC2)Cc1ccccc1C	22402154	Ivnitski-Steele_2008	reported by Montanari_2014	INACTIVE	0
1226	O(CC(=O)NCCc1ccccc1)c1ccc(cc1)-c1ccc(cc1)C#N	22406960	Ivnitski-Steele_2008	reported by Montanari_2014	INACTIVE	0
1227	O(CC(=O)N[C@H]([C@@H](O)C[C@@H](NC(=O)[C@@H](N1CCCNC1=O)C(C)C)Cc1ccccc1)Cc1ccccc1)c1c(cccc1C)C	Lopinavir	Matsson_2007	reported by Montanari_2014	INHIBITOR	1
1228	O(CC(C)C)C[C@@H]([NH+]1CCCC1)CN(Cc1ccccc1)c1ccccc1	bepridil	Saito_2006	reported by Montanari_2014	INACTIVE	0
1229	O(C[C@](CCC)(COC(=O)N)C)C(=O)NC(C)C	Carisoprodol	Matsson_2007	reported by Montanari_2014	INACTIVE	0
1230	O(C[C@@H](O)CN(C(=O)c1ccccc1)CCC)c1ccccc1C(=O)CCc1ccccc1	6	Cramer_2007	reported by Montanari_2014	INHIBITOR	1
1231	O(C[C@@H](O)C[NH+](C(C)C)C(C)C)c1ccccc1C(=O)CCc1ccccc1	1d	Cramer_2007	reported by Montanari_2014	INACTIVE	0
1232	O(C[C@@H](O)C[NH+](C(C)C)C(C)C)c1ccccc1[C@H](O)CCc1ccccc1	4	Cramer_2007	reported by Montanari_2014	INACTIVE	0
1233	O(C[C@@H](O)C[NH+](CC)CC)c1ccccc1C(=O)CCc1ccccc1	1b	Cramer_2007	reported by Montanari_2014	INACTIVE	0
1234	O(C[C@@H](O)C[NH+]1CCC(O)(CC1)c1ccccc1)c1ccccc1C(=O)C	2a	Cramer_2007	reported by Montanari_2014	INACTIVE	0
1235	O(C[C@@H](O)C[NH+]1CCC(O)(CC1)c1ccccc1)c1ccccc1C(=O)CC	2b	Cramer_2007	reported by Montanari_2014	INACTIVE	0
1236	O(C[C@@H](O)C[NH+]1CCC(O)(CC1)c1ccccc1)c1ccccc1C(=O)c1ccccc1	2c	Cramer_2007	reported by Montanari_2014	INACTIVE	0
1237	O(C[C@@H](O)C[NH+]1CCCC1)c1ccccc1C(=O)CCc1ccccc1	1g	Cramer_2007	reported by Montanari_2014	INACTIVE	0
1238	O(C[C@@H](O)C[NH+]1CCCCC1)c1ccccc1C(=O)CCc1ccccc1	1c	Cramer_2007	reported by Montanari_2014	INACTIVE	0
1239	O(C[C@@H](O)C[NH+]1CCCCC1)c1ccccc1Cc1ccccc1	1m	Cramer_2007	reported by Montanari_2014	INACTIVE	0
1240	O(C[C@@H](O)C[NH2+]C(C)C)c1c2c([nH]cc2)ccc1	Pindolol	Matsson_2007	reported by Montanari_2014	INACTIVE	0
1241	O(C[C@H](O)C[NH2+]C(C)C)c1c2c(ccc1)cccc2	Propranolol	Matsson_2007	reported by Montanari_2014	INACTIVE	0
1242	O(C[C@H](O)C[NH2+]C(C)C)c1ccc(cc1)CCOC	Metoprolol	Matsson_2007	reported by Montanari_2014	INACTIVE	0
1243	O(C[C@@H](O)C[NH2+]CC(c1ccccc1)c1ccccc1)c1ccccc1C(=O)CCc1ccccc1	3	Cramer_2007	reported by Montanari_2014	INHIBITOR	1
1244	O(C[C@@H](O)C[NH2+]CCC)c1ccccc1C(=O)CCc1ccccc1	1a	Cramer_2007	reported by Montanari_2014	INACTIVE	0
1245	O(C[C@@H](O)CNc1ccc([N+](=O)[O-])cc1)c1ccccc1C(=O)CCc1ccccc1	5d	Cramer_2007	reported by Montanari_2014	INHIBITOR	1
1246	O(C[C@@H](O)CNc1ccc(cc1)C(OC)=O)c1ccccc1C(=O)CCc1ccccc1	5b	Cramer_2007	reported by Montanari_2014	INHIBITOR	1
1247	O(C[C@@H](O)CNc1ccccc1)c1ccccc1C(=O)CCc1ccccc1	5a	Cramer_2007	reported by Montanari_2014	INHIBITOR	1
1248	O(CC)C(=O)/C(=C\c1cc(n(c1C)-c1ccccc1)C)/C#N	14743817	Ivnitski-Steele_2008	reported by Montanari_2014	INACTIVE	0
1249	O(CC)c1ccc(NC(=O)c2c3c(CN(CCOC)C3=O)ccc2)cc1	14733033	Ivnitski-Steele_2008	reported by Montanari_2014	INHIBITOR	1
1250	O(CC)c1ccc(OCC)cc1NC(=O)[C@@H]1CCCN(C1)c1nc(cc(n1)C)C	852968	Ivnitski-Steele_2008	reported by Montanari_2014	INACTIVE	0
1251	O(CC)c1ccc(OCC)cc1NC(=O)C[NH+]1CCN(CC1)c1cc(ccc1)C	844597	Ivnitski-Steele_2008	reported by Montanari_2014	INACTIVE	0
1252	O(CC)c1ccc(OCC)cc1NC(=O)C[NH+]1CCN(CC1)c1ccc(cc1C)C	851902	Ivnitski-Steele_2008	reported by Montanari_2014	INACTIVE	0
1253	O(CC)c1ccc(cc1)C1=[NH+]Cc2cc(ccc2N1)C1=[NH+]Cc2cc(N3CC[NH+](CC3)C)ccc2N1	Hoechst 33342	Matsson_2007	reported by Montanari_2014	INHIBITOR	1
1254	O(CC)c1ccccc1NC(=O)[C@H](OC(=O)c1ccc(N(C)C)cc1)c1ccccc1	17516519	Ivnitski-Steele_2008	reported by Montanari_2014	INHIBITOR	1
1255	O(CC)c1nc(N)c2c(c1)c(C#N)c(nc2N)N(CCCC)CC	14746574	Ivnitski-Steele_2008	reported by Montanari_2014	INACTIVE	0
1256	O(CC)c1nc(nc(n1)NCCO)Nc1ccc([N+](=O)[O-])cc1	17506185	Ivnitski-Steele_2008	reported by Montanari_2014	INACTIVE	0
1257	O(CC1CCCCC1)[C@@H]1C[C@H](N(C1)C(OC(C)(C)C)=O)C(=O)N[C@@H](CCCCNC(OCc1ccccc1)=O)C(OC(C)(C)C)=O	123095956	Arnaud_2010	reported by Montanari_2014	INACTIVE	0
1258	O(CCC(C)C)c1cc(OCC(=O)[O-])ccc1	24833190	Ivnitski-Steele_2008	reported by Montanari_2014	INACTIVE	0
1259	O(CC[NH+](C)C)c1ccc(cc1)\C(=C(\CC)/c1ccc(OC)cc1)\c1ccc(O)cc1	TAG-5	Sugimoto_2003	reported by Montanari_2014	INHIBITOR	1
1260	O(CC[NH+](C)C)c1ccc(cc1)\C(=C(\CC)/c1ccc(cc1)C(C)C)\c1ccc(O)cc1	TAG-72	Sugimoto_2003	reported by Montanari_2014	INHIBITOR	1
1261	O(CC[NH+](C)C)c1ccc(cc1)\C(=C(\CC)/c1ccccc1)\c1ccc(OC)cc1	TAG-2	Sugimoto_2003	reported by Montanari_2014	INHIBITOR	1
1262	O(CC[NH+](CCC)CCC)c1cc(ccc1C(C)C)C	22416193	Ivnitski-Steele_2008	reported by Montanari_2014	INACTIVE	0
1263	O(CC[NH+]1CCCCCC1)c1ccc([N+](=O)[O-])cc1	17433230	Ivnitski-Steele_2008	reported by Montanari_2014	INACTIVE	0
1264	O(CC[NH2+]C)c1ccc(cc1)\C(=C(\CC)/c1ccc(cc1)[C@H](CO)C)\c1ccc(O)cc1	TAG-8	Sugimoto_2003	reported by Montanari_2014	INHIBITOR	1
1265	O(CCOCCOCCOC)c1cc2CC[N@H+](Cc2cc1OC)CCc1ccc(NC(=O)c2cc(NC(=O)c3cc4c(nccc4)cc3)c(cc2)C(=O)[O-])cc1	131285221	Ochoa-Puentes_2011	reported by Montanari_2014	INACTIVE	0
1266	O(CCOCCOCCOC)c1cc2CC[N@H+](Cc2cc1OC)CCc1ccc(NC(=O)c2cc(NC(=O)c3cc4c(nccc4)cc3)c(cc2)C(OC)=O)cc1	131287273	Ochoa-Puentes_2011	reported by Montanari_2014	INHIBITOR	1
1267	O(CCOCCOCCOC)c1cc2CC[N@H+](Cc2cc1OC)CCc1ccc(NC(=O)c2cc(NC(=O)c3nc4c(cc3)cccc4)c(cc2)C(=O)[O-])cc1	131287255	Ochoa-Puentes_2011	reported by Montanari_2014	INACTIVE	0
1268	O(CCOCCOCCOC)c1cc2CC[N@H+](Cc2cc1OC)CCc1ccc(NC(=O)c2cc(NC(=O)c3nc4c(cc3)cccc4)c(cc2)C(OC)=O)cc1	131277171	Ochoa-Puentes_2011	reported by Montanari_2014	INHIBITOR	1
1269	O(CCOCCOCCOC)c1cc2c(cc1OC)CC[N@H+](C2)CCc1ccc(NC(=O)c2cc(NC(=O)c3cc4c(nccc4)cc3)c(cc2)C(=O)[O-])cc1	131279193	Ochoa-Puentes_2011	reported by Montanari_2014	INACTIVE	0
1270	O(CCOCCOCCOC)c1cc2c(cc1OC)CC[N@H+](C2)CCc1ccc(NC(=O)c2cc(NC(=O)c3cc4c(nccc4)cc3)c(cc2)C(OC)=O)cc1	131277303	Ochoa-Puentes_2011	reported by Montanari_2014	INHIBITOR	1
1271	O(CCOCCOCCOC)c1cc2c(cc1OC)CC[N@H+](C2)CCc1ccc(NC(=O)c2cc(NC(=O)c3nc4c(cc3)cccc4)c(cc2)C(=O)[O-])cc1	131273184	Ochoa-Puentes_2011	reported by Montanari_2014	INHIBITOR	1
1272	O(CCOCCOCCOC)c1cc2c(cc1OC)CC[N@H+](C2)CCc1ccc(NC(=O)c2cc(NC(=O)c3nc4c(cc3)cccc4)c(cc2)C(OC)=O)cc1	131285240	Ochoa-Puentes_2011	reported by Montanari_2014	INHIBITOR	1
1273	O(CCOc1ccc(cc1)C(=O)c1ccccc1)c1ccccc1OC	22403228	Ivnitski-Steele_2008	reported by Montanari_2014	INACTIVE	0
1274	O(Cc1cc(OC)c(OC)cc1)c1ccccc1CCc1cc(OC)ccc1	103578027	Colabufo_2008	reported by Montanari_2014	INACTIVE	0
1275	O(Cc1cc(OC)c(OC)cc1)c1ccccc1CCc1ccccc1	103578031	Colabufo_2008	reported by Montanari_2014	INACTIVE	0
1276	O(Cc1cc(ccc1)C(=O)N\N=C\c1cccnc1)c1ccc(OCC)cc1	22403648	Ivnitski-Steele_2008	reported by Montanari_2014	INACTIVE	0
1277	O(Cc1ccc([N+](=O)[O-])cc1)c1ccc(cc1)\C(=C(/CC)\c1ccccc1)\c1ccc(OCC[NH+](C)C)cc1	TAG-139	Sugimoto_2003	reported by Montanari_2014	INHIBITOR	1
1278	O(Cc1ccccc1)[C@@H]1C[C@H](N(C1)C(OC(C)(C)C)=O)C(=O)N[C@@H](CCCCNC(OCc1ccccc1)=O)C(OC(C)(C)C)=O	123091329	Arnaud_2010	reported by Montanari_2014	INACTIVE	0
1279	O(Cc1ccccc1)[C@@H]1C[C@H](N(C1)C(OC(C)(C)C)=O)C[NH2+][C@@H](CCCCNC(OCc1ccccc1)=O)C(OC(C)(C)C)=O	123095955	Arnaud_2010	reported by Montanari_2014	INACTIVE	0
1280	O(Cc1ccccc1)c1ccc(cc1)/C(=C(\c1ccc(OCC[NH+](C)C)cc1)/c1ccc(O)cc1)/CC	TAG-126	Sugimoto_2003	reported by Montanari_2014	INHIBITOR	1
1281	O(Cc1ccccc1)c1ccc(cc1)\C(=C(/CC)\c1ccccc1)\c1ccc(OCC[NH+](C)C)cc1	TAG-11	Sugimoto_2003	reported by Montanari_2014	INHIBITOR	1
1282	O(Cc1ccccc1)c1ccc(cc1)\C=C(/OC)\C(=O)N\C=C\c1ccc(O)cc1	103728143	Takada_2010	reported by Montanari_2014	INACTIVE	0
1283	O([N+](=O)[O-])CCNC(=O)c1cccnc1	nicorandil	Saito_2006	reported by Montanari_2014	INACTIVE	0
1284	O1C(=O)C(NC(=O)c2ccccc2)=CC(C(OC)=O)=C1\C=C\Nc1ccc(Oc2ccccc2)cc1	24821031	Ivnitski-Steele_2008	reported by Montanari_2014	INACTIVE	0
1285	O1[C@@H](C)[C@H](NC(=O)C=2C3=Nc4c(OC3=C(C)C(=O)C=2N)c(ccc4C(=O)N[C@@H]2[C@@H](OC(=O)[C@H](N(C)C(=O)CN(C)C(=O)[C@@H]3N(CCC3)C(=O)[C@@H](NC2=O)C(C)C)C(C)C)C)C)C(=O)N[C@H](C(C)C)C(=O)N2[C@H](CCC2)C(=O)N(CC(=O)N(C)[C@H](C(C)C)C1=O)C	actinomycin D	Saito_2006	reported by Montanari_2014	INACTIVE	0
1286	O1[C@@]2(CC(=CC(O)=C2[C@@H]2[C@H](C=CC(=C2)C)C1(C)C)CCCCC)C(=O)[O-]	Tetrahydrocannabinolic acid	Holland_2007	reported by Montanari_2014	INACTIVE	0
1287	O1[C@H](CCC[C@@H](O)CCC\C=C\c2c(C1=O)c(O)cc(O)c2)C	beta-Zearalenol	Katayama_2007	reported by Montanari_2014	INHIBITOR	1
1288	O1[C@@H](CO)[C@H](O)[C@H](O)[C@@H](O)[C@@H]1O[C@H]1[C@H]2[C@]([C@@H]3C[C@H](O)[C@@H]4[C@@](CC[C@H]4[C@](O[C@@H]4O[C@@H](CO)[C@H](O)[C@H](O)[C@H]4O)(CC\C=C(\C)/C)C)(C)[C@]3(C1)C)(CC[C@@H](O)C2(C)C)C	Ginsenoside Rg1	Jin_2006	reported by Montanari_2014	INACTIVE	0
1289	O1[C@@H](CO)[C@H](O)[C@H](O)[C@@H](O)[C@@H]1O[C@H]1CC[C@]2([C@@H](CC[C@@]3([C@@H]2C[C@@H](O)[C@H]2[C@]3(CC[C@@H]2[C@@](O)(CC\C=C(\C)/C)C)C)C)C1(C)C)C	Ginsenoside Rh2	Jin_2006	reported by Montanari_2014	INHIBITOR	1
1290	O1C/2=C(CC\C\2=C/c2ccc(cc2)C)[C@@H](C(C#N)=C1N)c1ccc(cc1)C	17387926	Ivnitski-Steele_2008	reported by Montanari_2014	INACTIVE	0
1291	O1C2=C([C@@H]3[C@@H](COc4cc(OC)ccc34)C1(C)C)C(=O)C(=O)C=1[C@H]3[C@H](COc4cc(OC)ccc34)C(OC=12)(C)C	103649245	Jimenez-Alonso_2008	reported by Montanari_2014	INACTIVE	0
1292	O1C2=C([C@@H]3[C@@H](COc4cc(OC)ccc34)C1(C)C)C(=O)C=1OC([C@@H]3OCc4cc(OC)ccc4[C@@H]3C=1C2=O)(C)C	103649246	Jimenez-Alonso_2008	reported by Montanari_2014	INACTIVE	0
1293	O1C2=C([C@H]3[C@@H](CC[C@H](C3)C)C1(C)C)C(=O)C=1OC([C@H]3[C@H](C=1C2=O)C[C@@H](CC3)C)(C)C	103649243	Jimenez-Alonso_2008	reported by Montanari_2014	INACTIVE	0
1294	O1C2=C([C@H]3[C@H](COc4cc(OC)ccc34)C1(C)C)C(=O)C(=O)C=1[C@H]3[C@H](COc4cc(OC)ccc34)C(OC=12)(C)C	103649244	Jimenez-Alonso_2008	reported by Montanari_2014	INACTIVE	0
1295	O1C=2N=Cn3nc(nc3C=2[C@@H](c2c3c(ccc12)cccc3)c1cc(OC)c(OC)cc1)Cc1ccc(OC)cc1	17514180	Ivnitski-Steele_2008	reported by Montanari_2014	INACTIVE	0
1296	O1C=C(C(=O)c2c1cc(O)cc2O)c1ccc(OC)cc1	Biochanin A	flavonoids_Zhang_2004	reported by Montanari_2014	INHIBITOR	1
1297	O1C=C(C(=O)c2c1cc(OC(=O)[C@H](NC(OC(C)(C)C)=O)CC(C)C)cc2)c1ccc([N+](=O)[O-])cc1	17511853	Ivnitski-Steele_2008	reported by Montanari_2014	INACTIVE	0
1298	O1C[C@]2([C@H]3C[C@]1(C(=O)Nc1ccc([N+](=O)[O-])cc1)[C@@]2(CC3)C)C	22415741	Ivnitski-Steele_2008	reported by Montanari_2014	INACTIVE	0
1299	O1CC2=C(C=C3N(Cc4c3nc3c(c4)cccc3)C2=O)[C@@](O)(CC)C1=O	103168388	Giannini_2008	reported by Montanari_2014	INHIBITOR	1
1300	O1CC2=C(C=C3N(Cc4c3nc3c(c4)cccc3)C2=O)[C@](O)(CC1=O)CC	103273666	Giannini_2008	reported by Montanari_2014	INHIBITOR	1
1301	O1CC2=C(C=C3N(Cc4c3nc3c(cccc3)c4\C=N\OC(C)(C)C)C2=O)[C@](O)(CC1=O)CC	103562866	Giannini_2008	reported by Montanari_2014	INHIBITOR	1
1302	O1CC2=C(C=C3N(Cc4c3nc3c(cccc3)c4\C=N\OC(C)(C)C)C2=O)[C@@](O)(CC)C1=O	103333307	Giannini_2008	reported by Montanari_2014	INHIBITOR	1
1303	O1CC2=C(C=C3N(Cc4c3nc3c(cccc3)c4\C=N\OCc3ccccc3)C2=O)[C@](O)(CC1=O)CC	103562814	Giannini_2008	reported by Montanari_2014	INHIBITOR	1
1304	O1CC2=C(C=C3N(Cc4c3nc3c(cccc3)c4\C=N\OCc3ccccc3)C2=O)[C@@](O)(CC)C1=O	103333268	Giannini_2008	reported by Montanari_2014	INHIBITOR	1
1305	O1C[C@H]2[C@@H]([C@@H](c3c(cc4OCOc4c3)[C@H]2O[C@@H]2O[C@H]3[C@@H](O[C@@H](OC3)C)[C@H](O)[C@H]2O)c2cc(OC)c(O)c(OC)c2)C1=O	Etoposide	Matsson_2007	reported by Montanari_2014	INACTIVE	0
1306	O1CCC[C@@H]1C(=O)N1CCN(CC1)c1nc(N)c2cc(OC)c(OC)cc2n1	Terazosin	Matsson_2007	reported by Montanari_2014	INACTIVE	0
1307	O1CCN(CC1)C(=O)c1ccccc1NC(=O)COc1ccc(OC)cc1	24786839	Ivnitski-Steele_2008	reported by Montanari_2014	INACTIVE	0
1308	O1CC[NH+](CC1)C[C@H](O)COc1ccccc1C(=O)CC	1e	Cramer_2007	reported by Montanari_2014	INACTIVE	0
1309	O1CC[NH+](CC1)C[C@H](O)COc1ccccc1C(=O)CCc1ccccc1	1h	Cramer_2007	reported by Montanari_2014	INACTIVE	0
1310	O1CCN(CC1)c1cc(OCC)c(NC(=O)COC(=O)c2cc(cc(c2)C)C)cc1OCC	22407066	Ivnitski-Steele_2008	reported by Montanari_2014	INACTIVE	0
1311	O1CCN(CC1)c1ccc(cc1)/C(=N/NC(=O)COc1cc(cc(c1)C)C)/C	22407568	Ivnitski-Steele_2008	reported by Montanari_2014	INACTIVE	0
1312	O1CCN(CC1)c1ccccc1NC(=O)c1cc(ccc1OC)CN1C(=O)c2c(cccc2)C1=O	24830031	Ivnitski-Steele_2008	reported by Montanari_2014	INACTIVE	0
1313	O1[C@@H](C=C[C@@H]1N1C=C(C)C(=O)NC1=O)CO	Stavudine	Weiss_2007	reported by Montanari_2014	INACTIVE	0
1314	O1[C@@H](CC[C@@H]1N1C=CC(=NC1=O)N)CO	Zalcitabine	Weiss_2007	reported by Montanari_2014	INACTIVE	0
1315	O1[C@@H](CC[C@@H]1n1c2NC=NC(=O)c2nc1)CO	Didanosine	Weiss_2007	reported by Montanari_2014	INACTIVE	0
1316	O1[C@@H](C[NH3+])[C@H](O)[C@@H](O)[C@@H]([NH3+])[C@H]1O[C@@H]1[C@H](O)[C@@H](O[C@@H]1CO)O[C@@H]1[C@@H](O[C@H]2O[C@H](C[NH3+])[C@H](O)[C@@H](O)[C@@H]2[NH3+])[C@@H]([NH3+])C[C@@H]([NH3+])[C@H]1O	Neomycin sulfate	Matsson_2007	reported by Montanari_2014	INACTIVE	0
1317	O1[C@@H](C[C@@H](O)CC1=O)CC[C@@H]1[C@@H]2C(=C[C@@H](C[C@@H]2OC(=O)C(CC)(C)C)C)C=C[C@@H]1C	Simvastatin	Matsson_2007	reported by Montanari_2014	INHIBITOR	1
1318	O1[C@@H]([C@H](O)[C@H](O)CO)[C@H](NC(=O)C)[C@@H](\[NH+]=C(\N)/N)C=C1C(=O)[O-]	Zanamivir	Matsson_2007	reported by Montanari_2014	INACTIVE	0
1319	O1[C@@H](c2c(c(OC)c(OC)cc2)C1=O)[C@@H]1[N@H+](CCc2c1c(OC)c1OCOc1c2)C	Noscapine	Matsson_2009	reported by Montanari_2014	INACTIVE	0
1320	O1[C@@H]2C[C@@]3(O[C@H]([C@H](CC)C)[C@H](CC3)C)O[C@H](C\C=C(\C)/[C@H](O[C@@H]3O[C@@H](C)[C@H](O[C@@H]4O[C@@H](C)[C@H](O)[C@@H](OC)C4)[C@@H](OC)C3)[C@H](\C=C\C=C\3/CO[C@@H]4[C@H](O)C(=C[C@H]([C@]/34O)C1=O)C)C)C2	Ivermectin	Matsson_2009	reported by Montanari_2014	INHIBITOR	1
1321	O1[C@@H]2C[C@H](O)[C@@]3([C@H]([C@H](OC(=O)c4ccccc4)[C@]4(O)C[C@H](OC(=O)[C@H](O)[C@@H](NC(=O)c5ccccc5)c5ccccc5)C(=C([C@@H](OC(=O)C)C3=O)C4(C)C)C)[C@]2(OC(=O)C)C1)C	paclitaxel	Saito_2006	reported by Montanari_2014	INACTIVE	0
1322	O1[C@@]2([C@H](O[C@H]1CCC)C[C@H]1[C@H]3[C@@H]([C@@]4(C(=CC(=O)C=C4)CC3)C)[C@@H](O)C[C@@]12C)C(=O)CO	Budesonide	Matsson_2007	reported by Montanari_2014	INACTIVE	0
1323	O1[C@H](C(=O)[O-])[C@@H](O)[C@H](O)[C@@H](O)[C@@H]1O[C@H]1CC[C@H]2[C@H]3[C@H](CC[C@]12C)c1c(cc(O)cc1)CC3	Estradiol-17beta-glucuronide	Matsson_2009	reported by Montanari_2014	INACTIVE	0
1324	O1[C@H](CC)[C@](O)(C)[C@H](O)[C@@H](C)C(=O)[C@@H](C[C@](O)(C)[C@@H](O[C@@H]2O[C@@H](C[C@H]([NH+](C)C)[C@H]2O)C)[C@@H](C)[C@H](O[C@@H]2O[C@@H](C)[C@H](O)[C@](OC)(C2)C)[C@@H](C)C1=O)C	Erythromycin	Matsson_2007	reported by Montanari_2014	INACTIVE	0
1325	O1[C@H](CCC[C@H](O)CCC\C=C\c2c(C1=O)c(O)cc(O)c2)C	alpha-Zearalenol	Katayama_2007	reported by Montanari_2014	INHIBITOR	1
1326	O1[C@H](CO)[C@@H](O)[C@H](O)[C@@H](O)[C@@H]1O[C@@H]1[C@@H]2[C@@]([C@H]3C[C@@H](O)[C@H]4[C@](CC[C@@H]4[C@](O)(CC\C=C(\C)/C)C)(C)[C@@]3(C1)C)(CC[C@@H](O)C2(C)C)C	Ginsenoside Rh1	Jin_2006	reported by Montanari_2014	INACTIVE	0
1327	O1[C@H](CO)[C@@H](O)[C@H](O)[C@@H](O)[C@@H]1Oc1cc(O)c2c(O[C@@H](CC2=O)c2ccc(O)cc2)c1	Naringenin-7-O-glucoside	Imai_2004	reported by Montanari_2014	INHIBITOR	1
1328	O1[C@H](CO)[C@@H](O)[C@H](O)[C@@H](O)[C@@H]1Oc1cc(O)cc(O)c1C(=O)CCc1ccc(O)cc1	Phloridzin	flavonoids_Zhang_2004	reported by Montanari_2014	INACTIVE	0
1329	O1[C@H](CO)[C@@H](O)[C@H](CO)[C@@H](O)[C@@H]1O[C@@H]1[C@@H](O)[C@H](O)[C@H](O[C@H]1O[C@@H]1CC[C@]2([C@@H](CC[C@H]3[C@H]2C[C@H](O)[C@H]2[C@@]3(CC[C@H]2[C@@](O)(CC\C=C(\C)/C)C)C)C1(C)C)C)CO	Ginsenoside Rg3	Jin_2006	reported by Montanari_2014	INACTIVE	0
1330	O1[C@H](CO)[C@@H](N=[N+]=[N-])C[C@@H]1N1C=C(C)C(=O)NC1=O	Zidovudine	Matsson_2007	reported by Montanari_2014	INACTIVE	0
1331	O1[C@](NC(=O)[C@@H]2C=C3[C@H]([N@@H+](C2)C)Cc2c4c3cccc4[nH]c2)(C(C)C)C(=O)N2[C@@H](Cc3ccccc3)C(=O)N3[C@@H](CCC3)[C@]12O	Ergocristine	Matsson_2007	reported by Montanari_2014	INHIBITOR	1
1332	O1c2c(-c3c(ccc(c3)C)C1(C)C)c(O)cc(c2)CCCCC	cannabinol	Holland_2007	reported by Montanari_2014	INHIBITOR	1
1333	O1c2c(C(=O)C(=O)[C@@H]1c1ccccc1)c(OC)cc(OC)c2	5,7-Dimethoxyflavonone	Pick_2011	reported by Montanari_2014	INACTIVE	0
1334	O1c2c(C(=O)C(C\C=C(/CO)\C)=C1c1cc(O)c(O)cc1O)c(O)cc1OC(C=Cc12)(C)C	124965661	Versiani_2011	reported by Montanari_2014	INHIBITOR	1
1335	O1c2c(C(=O)C(O)=C1c1ccc(O)cc1)c(O)c(C\C=C(\CC\C=C(\C)/C)/C)c(O)c2	103638829	Versiani_2011	reported by Montanari_2014	INHIBITOR	1
1336	O1c2c(C(=O)C(O)=C1c1ccccc1)c(O)cc(O)c2	Galangin	Imai_2004	reported by Montanari_2014	INHIBITOR	1
1337	O1c2c(C(=O)[C@@H](O)[C@@H]1c1cc3O[C@H]([C@@H](Oc3cc1)CO)c1cc(OC)c(O)cc1)c(O)cc(O)c2	Silymarin	flavonoids_Zhang_2004	reported by Montanari_2014	INHIBITOR	1
1338	O1c2c(C(=O)C(OC)=C1c1cc(O)c(OC)cc1)c(O)cc(OC)c2	103276902	Versiani_2011	reported by Montanari_2014	INHIBITOR	1
1339	O1c2c(C(=O)C(OC)=C1c1cc(OC)c(O)cc1)c(O)cc(OC)c2	103417331	Versiani_2011	reported by Montanari_2014	INHIBITOR	1
1340	O1c2c(C(=O)C(OC)=C1c1cc(OC)c(OC)cc1)c(OC)c(OC)c(OC)c2OC	3,3',4',5,6,7,8-Heptamethoxyflavone	Pick_2011	reported by Montanari_2014	INHIBITOR	1
1341	O1c2c(C(=O)C(OC)=C1c1cc(OC)cc(O)c1C\C=C(\C)/C)c(O)cc(O)c2	124970970	Versiani_2011	reported by Montanari_2014	INHIBITOR	1
1342	O1c2c(C(=O)C(OC)=C1c1ccc(O)cc1)c(O)c(OC)c(OC)c2	Penduletin	Pick_2011	reported by Montanari_2014	INHIBITOR	1
1343	O1c2c(C(=O)C(O[C@@H]3O[C@H](CO)[C@H](O)[C@H](O)[C@H]3O)=C1c1cc(O)c(O)cc1)c(O)cc(O)c2	Hyperoside	Pick_2011	reported by Montanari_2014	INACTIVE	0
1344	O1c2c(C(=O)C=C1C(=O)N1CCN(CC1)C(=O)C)c(O)ccc2	103261706	Boumendjel_2005	reported by Montanari_2014	INACTIVE	0
1345	O1c2c(C(=O)C=C1C(=O)N1CCN(CC1)C(OC(C)(C)C)=O)c(O)ccc2	103513503	Boumendjel_2005	reported by Montanari_2014	INACTIVE	0
1346	O1c2c(C(=O)C=C1C(=O)N1CC[NH+](CC1)CC(C)C)c(O)ccc2	103513516	Boumendjel_2005	reported by Montanari_2014	INACTIVE	0
1347	O1c2c(C(=O)C=C1C(=O)N1CC[NH+](CC1)CC)c(O)ccc2	103261745	Boumendjel_2005	reported by Montanari_2014	INACTIVE	0
1348	O1c2c(C(=O)C=C1C(=O)N1CC[NH+](CC1)CC1CCCCC1)c(O)ccc2	103513529	Boumendjel_2005	reported by Montanari_2014	INACTIVE	0
1349	O1c2c(C(=O)C=C1C(=O)N1CC[NH+](CC1)CCC)c(O)ccc2	103513509	Boumendjel_2005	reported by Montanari_2014	INACTIVE	0
1350	O1c2c(C(=O)C=C1C(=O)N1CC[NH+](CC1)CCCC)c(O)ccc2	103513515	Boumendjel_2005	reported by Montanari_2014	INHIBITOR	1
1351	O1c2c(C(=O)C=C1C(=O)N1CC[NH+](CC1)CCCCC)c(O)ccc2	103513523	Boumendjel_2005	reported by Montanari_2014	INHIBITOR	1
1352	O1c2c(C(=O)C=C1C(=O)N1CC[NH+](CC1)CCO)c(O)ccc2	103513524	Boumendjel_2005	reported by Montanari_2014	INACTIVE	0
1353	O1c2c(C(=O)C=C1C(=O)N1CC[NH2+]CC1)c(O)ccc2	103513508	Boumendjel_2005	reported by Montanari_2014	INACTIVE	0
1354	O1c2c(C(=O)C=C1C(=O)NCCc1ccc(OC)cc1)c(O)ccc2	103513536	Boumendjel_2005	reported by Montanari_2014	INHIBITOR	1
1355	O1c2c(C(=O)C=C1C(=O)NCCc1ccccc1)c(O)ccc2	103513530	Boumendjel_2005	reported by Montanari_2014	INHIBITOR	1
1356	O1c2c(C(=O)C=C1C)c(O)c1c(cc(O)cc1OC)c2	103558665	Bokesch_2010	reported by Montanari_2014	INACTIVE	0
1357	O1c2c(C(=O)C=C1C)c(O)c1c(cc(OC)cc1O)c2OC	103766240	Bokesch_2010	reported by Montanari_2014	INACTIVE	0
1358	O1c2c(C(=O)C=C1C)c(O)cc1c2c(OC)cc(O)c1	103581498	Bokesch_2010	reported by Montanari_2014	INHIBITOR	1
1359	O1c2c(C(=O)C=C1CCC)c(O)c1c(cc(O)cc1OC)c2	103558663	Bokesch_2010	reported by Montanari_2014	INACTIVE	0
1360	O1c2c(C(=O)C=C1CCC)c(O)c1c(cc(OC)cc1O)c2OC	103766241	Bokesch_2010	reported by Montanari_2014	INACTIVE	0
1361	O1c2c(C(=O)C=C1CCC)c(O)cc1c2c(OC)cc(O)c1	103558666	Bokesch_2010	reported by Montanari_2014	INHIBITOR	1
1362	O1c2c(C(=O)C=C1CCC)c(OC)cc1c2c(OC)cc(O)c1	103766244	Bokesch_2010	reported by Montanari_2014	INHIBITOR	1
1363	O1c2c(C(=O)C=C1c1cc(O)c(OC)cc1)c(O)cc(O[C@@H]1O[C@H](CO[C@@H]3O[C@@H](C)[C@H](O)[C@@H](O)[C@H]3O)[C@@H](O)[C@H](O)[C@H]1O)c2	Diosmin	Imai_2004	reported by Montanari_2014	INACTIVE	0
1364	O1c2c(C(=O)C=C1c1cc(O)c(O[C@@H]3O[C@H](CO)[C@@H](O)[C@H](O)[C@H]3O)cc1)c(O)cc(O)c2	Luteolin-4'-beta-D-glucoside	Imai_2004	reported by Montanari_2014	INHIBITOR	1
1365	O1c2c(C(=O)C=C1c1ccc(O)cc1)c(O)cc(O)c2[C@@H]1O[C@H](CO)[C@@H](O)[C@H](O)[C@H]1O[C@@H]1O[C@@H](C)[C@H](O)[C@@H](O)[C@H]1O	Vitexin-2-O-rhamnoside	Pick_2011	reported by Montanari_2014	INACTIVE	0
1366	O1c2c(C(=O)C=C1c1ccc(O)cc1)c(O)cc(O[C@@H]1O[C@H](CO)[C@@H](O)[C@H](O)[C@H]1O)c2	Apigetrin	Pick_2011	reported by Montanari_2014	INACTIVE	0
1367	O1c2c(C(=O)C=C1c1ccc(O)cc1)c(O)cc(O[C@@H]1O[C@H](CO)[C@@H](O)[C@H](O)[C@H]1O[C@@H]1O[C@@H](C)[C@H](O)[C@@H](O)[C@H]1O)c2	Rhoifolin	Katayama_2007	reported by Montanari_2014	INACTIVE	0
1368	O1c2c(C(=O)C=C1c1ccc(O[C@@H]3O[C@@H](C)[C@H](O)[C@@H](O)[C@H]3O)cc1)c(O)cc(O)c2[C@@H]1O[C@H](CO)[C@@H](O)[C@H](O)[C@H]1O	Vitexin rhamnoside	Pick_2011	reported by Montanari_2014	INACTIVE	0
1369	O1c2c(C(=O)C=C1c1ccccc1)c(O)cc(O)c2C(C=C)(C)C	8-(1,1-Dimethylallyl)chrysin	Ahmed-Belkacem_2005	reported by Montanari_2014	INHIBITOR	1
1370	O1c2c(C(=O)C=C1c1ccccc1)c(O)cc(O)c2C\C=C(\C)/C	8-(3,3-dimethylallyl)chrysin	Ahmed-Belkacem_2005	reported by Montanari_2014	INHIBITOR	1
1371	O1c2c(C(=O)C=C1c1ccccc1)c(OC)cc(OC)c2	Chrysin 5,7-dimethyl ether	Pick_2011	reported by Montanari_2014	INHIBITOR	1
1372	O1c2c(C(=O)C[C@@H]1c1ccc(O)cc1)c(O)cc(O)c2	Naringenin	Imai_2004	reported by Montanari_2014	INHIBITOR	1
1373	O1c2c(C(=O)C[C@H]1c1cc(O)c(OC)cc1)c(O)cc(O)c2C\C=C(\C)/C	124968332	Versiani_2011	reported by Montanari_2014	INHIBITOR	1
1374	O1c2c(C(=O)C[C@H]1c1cc(O)cc(O)c1)c(O)cc(O)c2C\C=C(\CC\C=C(\C)/C)/C	124963027	Versiani_2011	reported by Montanari_2014	INHIBITOR	1
1375	O1c2c(C(=O)C[C@H]1c1ccc(O)cc1)c(O)cc(O)c2C\C=C(\CC\C=C(\C)/C)/C	103597783	Versiani_2011	reported by Montanari_2014	INHIBITOR	1
1376	O1c2c(C(=O)Nc3c1cccc3)c(Oc1ccccc1)cc([N+](=O)[O-])c2	17510826	Ivnitski-Steele_2008	reported by Montanari_2014	INACTIVE	0
1377	O1c2c(C3=C(CCCC3)C1=O)c(OCC(OC)=O)cc(c2)C	4244886	Ivnitski-Steele_2008	reported by Montanari_2014	INACTIVE	0
1378	O1c2c(C3=C(CCCC3)C1=O)cc1c(oc(C)c1C)c2C	7976808	Ivnitski-Steele_2008	reported by Montanari_2014	INACTIVE	0
1379	O1c2c(C3=C(Oc4c(C3=O)c(O)cc(O)c4)[C@@H]1O)cccc2	103510963	Ahmed-Belkacem_2007	reported by Montanari_2014	INACTIVE	0
1380	O1c2c(C3=C(Oc4c(c(O)c(C)c(O)c4)C3=O)[C@@H]1O)cccc2	103510961	Ahmed-Belkacem_2007	reported by Montanari_2014	INHIBITOR	1
1381	O1c2c(C3=C(Oc4c(c(O)c(C)c(O)c4)C3=O)[C@@H]1OC)cccc2	103510970	Ahmed-Belkacem_2007	reported by Montanari_2014	INACTIVE	0
1382	O1c2c([C@H]3[C@@H](CC=C(C3)C)C1(C)C)c(O)cc(c2)CCCCC	tetrahydrocannabinol	Holland_2007	reported by Montanari_2014	INHIBITOR	1
1383	O1c2c(OC1)cc1ncc-3c(c1c2)C(=O)N(c1cc(OC)c(OC)cc1-3)CC[NH+](C)C	103453069	Feng_2009	reported by Montanari_2014	INHIBITOR	1
1384	O1c2c(OC1)cc1[nH+]cc3-c4c(cc(OC)c(OC)c4)C(=O)N(c3c1c2)CC[N@@H+](C(C)C)CC#C	103646946	Feng_2008	reported by Montanari_2014	INHIBITOR	1
1385	O1c2c(OC1)cc1[nH+]cc3-c4c(cc(OC)c(OC)c4)C(=O)N(c3c1c2)CC[N@@H+](C(C)C)CC#N	103646877	Feng_2008	reported by Montanari_2014	INHIBITOR	1
1386	O1c2c(OC1)cc1[nH+]cc3-c4c(cc(OC)c(OC)c4)C(=O)N(c3c1c2)CC[NH+](C)C	103270395	Feng_2008	reported by Montanari_2014	INHIBITOR	1
1387	O1c2c(OC1)cc1[nH+]cc3-c4c(cc(OC)c(OC)c4)C(=O)N(c3c1c2)CC[N@@H+](CC#C)C	103646944	Feng_2008	reported by Montanari_2014	INHIBITOR	1
1388	O1c2c(OC1)cc1[nH+]cc3-c4c(cc(OC)c(OC)c4)C(=O)N(c3c1c2)CC[N@@H+](CC#C)CC	103646945	Feng_2008	reported by Montanari_2014	INHIBITOR	1
1389	O1c2c(OC1)cc1[nH+]cc3-c4c(cc(OC)c(OC)c4)C(=O)N(c3c1c2)CC[N@@H+](CC#N)C	103646875	Feng_2008	reported by Montanari_2014	INHIBITOR	1
1390	O1c2c(OC1)cc1[nH+]cc3-c4c(cc(OC)c(OC)c4)C(=O)N(c3c1c2)CC[N@@H+](CC#N)CC	103646876	Feng_2008	reported by Montanari_2014	INHIBITOR	1
1391	O1c2c(OC1)cc1[nH+]cc3-c4c(cc(OC)c(OC)c4)C(=O)N(c3c1c2)CC[N@@H+](CC(=O)N)C	103646947	Feng_2008	reported by Montanari_2014	INHIBITOR	1
1392	O1c2c(OC1)cc1ncc3c4c(cc(OC)c(OC)c4)c(cc3c1c2)C(=O)N	103612127	Feng_2009	reported by Montanari_2014	INACTIVE	0
1393	O1c2c(OC1)cc1ncc3c4c(cc(OC)c(OC)c4)c(cc3c1c2)C(=O)N(C)C	103612129	Feng_2009	reported by Montanari_2014	INHIBITOR	1
1394	O1c2c(OC1)cc1ncc3c4c(cc(OC)c(OC)c4)c(cc3c1c2)C(=O)NC	103612128	Feng_2009	reported by Montanari_2014	INHIBITOR	1
1395	O1c2c(OC1)cc1ncc3c4c(cc(OC)c(OC)c4)c(cc3c1c2)C(=O)NCC[NH+](C)C	103453032	Feng_2009	reported by Montanari_2014	INHIBITOR	1
1396	O1c2c(OC1)cc1ncc3c4c(cc(OC)c(OC)c4)c(cc3c1c2)[C@H](O)CCC[NH+](C)C	103612429	Feng_2009	reported by Montanari_2014	INHIBITOR	1
1397	O1c2c(OC1)cc1ncc3c4c(cc(OC)c(OC)c4)c(cc3c1c2)C=O	103612045	Feng_2009	reported by Montanari_2014	INHIBITOR	1
1398	O1c2c(OC1)cc1ncc3c4c(cc(OC)c(OC)c4)c(cc3c1c2)CCCC[NH+](C)C	103612220	Feng_2009	reported by Montanari_2014	INHIBITOR	1
1399	O1c2c(OC1)cc1ncc3c4c(cc(OC)c(OC)c4)c(cc3c1c2)CCC[NH+](C)C	103612218	Feng_2009	reported by Montanari_2014	INHIBITOR	1
1400	O1c2c(OC1)cc1ncc3c4c(cc(OC)c(OC)c4)c(cc3c1c2)CC[NH3+]	103612125	Feng_2009	reported by Montanari_2014	INHIBITOR	1
1401	O1c2c(OC1)cc1ncc3c4c(cc(OC)c(OC)c4)c(cc3c1c2)CC[NH+](C)C	103612126	Feng_2009	reported by Montanari_2014	INHIBITOR	1
1402	O1c2c(OC1)cc1ncc3c4c(cc(OC)c(OC)c4)c(cc3c1c2)CC[N+](=O)[O-]	103612048	Feng_2009	reported by Montanari_2014	INHIBITOR	1
1403	O1c2c(OC1)cc1ncc3c4c(cc(OC)c(OC)c4)c(cc3c1c2)C[NH+](C)C	103612046	Feng_2009	reported by Montanari_2014	INHIBITOR	1
1404	O1c2c(OC1)cc1ncc3c4c(cc(OC)c(OC)c4)c(cc3c1c2)C[NH2+]CC[NH+](C)C	103612430	Feng_2009	reported by Montanari_2014	INHIBITOR	1
1405	O1c2c(OC1)cc1ncc3c4c(cc(OC)c(OC)c4)c(cc3c1c2)CO	103612044	Feng_2009	reported by Montanari_2014	INHIBITOR	1
1406	O1c2c(OC1)cc1ncc3c4c(cc(OC)c(OC)c4)c(cc3c1c2)\C=C\CC[NH+](C)C	103612219	Feng_2009	reported by Montanari_2014	INHIBITOR	1
1407	O1c2c(OC1)cc1ncc3c4c(cc(OC)c(OC)c4)c(cc3c1c2)\C=C\C[NH+](C)C	103612217	Feng_2009	reported by Montanari_2014	INHIBITOR	1
1408	O1c2c(OC1)cc1ncc3c4c(cc(OC)c(OC)c4)c(cc3c1c2)\C=C\[N+](=O)[O-]	103612047	Feng_2009	reported by Montanari_2014	INHIBITOR	1
1409	O1c2c(OC1)cc1[nH+]ccc(N(C(=O)c3cc(OCC)c(OCC)cc3)CC[NH+](C)C)c1c2	103647008	Feng_2008	reported by Montanari_2014	INHIBITOR	1
1410	O1c2c(c(O)c(C(C=C)(C)C)c(O)c2)C(=O)C=C1c1ccccc1	6-(1,1-Dimethylallyl)chrysin	Ahmed-Belkacem_2005	reported by Montanari_2014	INHIBITOR	1
1411	O1c2c(c(O)c(C)c(O)c2)C(=O)C[C@H]1c1ccccc1	Strobopinin	Pick_2011	reported by Montanari_2014	INACTIVE	0
1412	O1c2c(c(O)c(C)c(OC)c2)C(=O)C=C1c1ccccc1	5-Hydroxy-6-methyl-7-methoxy-flavone	Pick_2011	reported by Montanari_2014	INHIBITOR	1
1413	O1c2c(c(O)c(C)c(OC)c2)C(=O)C[C@@H]1c1ccccc1	Strobopinin-7-methylether	Pick_2011	reported by Montanari_2014	INHIBITOR	1
1414	O1c2c(c(O)c(C\C=C(\C)/C)c(O)c2)C(=O)C=C1c1ccccc1	6-(3,3-Dimethylallyl)chrysin	Ahmed-Belkacem_2005	reported by Montanari_2014	INHIBITOR	1
1415	O1c2c(c(O)c(C\C=C(\C)/C)c(O)c2C\C=C(\C)/C)C(=O)C[C@H]1c1cc(O)cc(O)c1	124965660	Versiani_2011	reported by Montanari_2014	INHIBITOR	1
1416	O1c2c(c(O)c(C\C=C(\CC\C=C(\C)/C)/C)c(O)c2)C(=O)C=C1c1ccccc1	6-Geranylchrysin	Ahmed-Belkacem_2005	reported by Montanari_2014	INHIBITOR	1
1417	O1c2c(c(O)c(C\C=C(\CC\C=C(\C)/C)/C)c(O)c2C\C=C(\CC\C=C(\C)/C)/C)C(=O)C=C1c1ccccc1	6,8-Digeranylchrysin	Ahmed-Belkacem_2005	reported by Montanari_2014	INHIBITOR	1
1418	O1c2c(c(O)c(C\C=C(\CC\C=C(\CC\C=C(\C)/C)/C)/C)c(O)c2)C(=O)C=C1c1ccccc1	6-Farnesylchrysin	Ahmed-Belkacem_2005	reported by Montanari_2014	INACTIVE	0
1419	O1c2c(c(O)c(OC)c3c2c(OC)cc(O)c3)C(=O)C=C1C	103766242	Bokesch_2010	reported by Montanari_2014	INHIBITOR	1
1420	O1c2c(c(OC)c(C)c(OC)c2)C(=O)C=C1c1ccccc1	Strobochrysin-dimethylether	Pick_2011	reported by Montanari_2014	INHIBITOR	1
1421	O1c2c(c(OC)c(OC)c(OC)c2)C(=O)C=C1c1ccccc1	5,6,7-Trimethoxyflavone	flavonoids_Zhang_2005	reported by Montanari_2014	INHIBITOR	1
1422	O1c2c(c(OC)c(OC)c3c2c(OC)cc(O)c3)C(=O)C=C1C	103766243	Bokesch_2010	reported by Montanari_2014	INACTIVE	0
1423	O1c2c(c(OC)c(OC)c3c2c(OC)cc(O)c3)C(=O)C=C1CCC	103562357	Bokesch_2010	reported by Montanari_2014	INHIBITOR	1
1424	O1c2c(c3O[C@]4(OC)[C@@H](OC)C(=O)C5=C(O[C@@H](C[C@H]5OC)c5ccccc5)[C@]4(OC)c3c(OC)c2OC)[C@H](O)C[C@H]1c1ccccc1	calyflorenon B	Pick_2011	reported by Montanari_2014	INACTIVE	0
1425	O1c2c(c3O[C@]45O[C@H](CC=C4C(=O)C(OC)=C(OC)[C@]5(OC)c3c(OC)c2OC)c2ccccc2)[C@@H](OC)C[C@@H]1c1ccccc1	neocalycopteron-4-methylether	Pick_2011	reported by Montanari_2014	INACTIVE	0
1426	O1c2c(cc(O)c(O)c2)C(=O)C[C@H]1c1cccc(O)c1O	6,2',3'-7-Hydroxyflavanone	flavonoids_Zhang_2005	reported by Montanari_2014	INHIBITOR	1
1427	O1c2c(cc(OC)cc2)C(=O)C(O)=C1c1ccc(OC)cc1	6,4'-Dimethoxy-3-hydroxy-flavone	flavonoids_Zhang_2005	reported by Montanari_2014	INHIBITOR	1
1428	O1c2c(cc(OC)cc2)C(=O)C=C1c1ccccc1	6-Methoxyflavone	Pick_2011	reported by Montanari_2014	INHIBITOR	1
1429	O1c2c(cc(OC)cc2)C(=O)C[C@@H]1c1ccccc1	6-Methoxyflavanon	Pick_2011	reported by Montanari_2014	INACTIVE	0
1430	O1c2c(cc(cc2)CC)/C(=N/C=2C(=O)N(N(C)C=2C)c2ccccc2)/C=C1c1ccc(OC)cc1	24784883	Ivnitski-Steele_2008	reported by Montanari_2014	INACTIVE	0
1431	O1c2c(ccc(O)c2)C(=O)C=C1c1ccccc1	7-hydroxyflavone	Ahmed-Belkacem_2005	reported by Montanari_2014	INHIBITOR	1
1432	O1c2c(ccc(O)c2O)C(=O)C=C1c1ccccc1	7,8-Dihydroxyflavone	flavonoids_Zhang_2005	reported by Montanari_2014	INHIBITOR	1
1433	O1c2c(ccc(OC)c2)C(=O)C=C1c1cc(OC)c(OC)cc1	3',4',7-trimethoxyflavone	Katayama_2007	reported by Montanari_2014	INHIBITOR	1
1434	O1c2c(ccc(OC)c2)C(=O)C[C@@H]1c1ccccc1	7-Methoxyflavanone	flavonoids_Zhang_2005	reported by Montanari_2014	INHIBITOR	1
1435	O1c2c(ccc3c2cccc3)C(=O)C=C1c1ccccc1O	2-(2-hydroxyphenyl)benzo[h]chromen-4-one	flavonoids_Zhang_2005	reported by Montanari_2014	INHIBITOR	1
1436	O1c2c(cccc2)C(=O)C([C@@H](CC(=O)C)c2ccccc2)=C1[O-]	Warfarin	Matsson_2007	reported by Montanari_2014	INACTIVE	0
1437	O1c2c(cccc2)C(=O)C(OC)(OC)[C@]1(OC)c1ccccc1	Trimethoxyflavanone	flavonoids_Zhang_2005	reported by Montanari_2014	INHIBITOR	1
1438	O1c2c(cccc2)C(=O)C[C@H]1c1ccccc1	Flavanone	flavonoids_Zhang_2005	reported by Montanari_2014	INHIBITOR	1
1439	O1c2c(cccc2)[C@]2(O)[C@H](Oc3c(c(O)c(OC)c(OC)c3)C2=O)C1	103510978	Ahmed-Belkacem_2007	reported by Montanari_2014	INACTIVE	0
1440	O1c2c(cccc2C)C(=O)C=C1c1ccccc1	8-Methylflavone	flavonoids_Zhang_2005	reported by Montanari_2014	INHIBITOR	1
1441	O1c2c(cccc2O)[C@]2(O)[C@H](Oc3c(c(O)c(C)c(OC)c3)C2=O)C1	103510962	Ahmed-Belkacem_2007	reported by Montanari_2014	INACTIVE	0
1442	O1c2c3CCCN4CCCc(c34)cc2C=C(C(=O)Nc2ccccc2)C1=N	4244548	Ivnitski-Steele_2008	reported by Montanari_2014	INACTIVE	0
1443	O1c2c3c4c(c(O)c2C)C(O)=C(NC(=O)/C(=C/C=C/[C@H](C)[C@H](O)[C@@H](C)[C@@H](O)[C@@H](C)[C@@H](OC(=O)C)[C@H](C)[C@@H](OC)\C=C\O[C@]1(C)C3=O)/C)\C(=C\NN1CC[NH+](CC1)C)\C4=O	Rifampicin	Matsson_2009	reported by Montanari_2014	INACTIVE	0
1444	O1c2cc(O)c(cc2C=C(c2oc(nn2)-c2ccccc2O)C1=O)CCCCCC	857352	Ivnitski-Steele_2008	reported by Montanari_2014	INACTIVE	0
1445	O1c2cc(O)ccc2C2=C(Oc3c(c(O)c(C)c(O)c3)C2=O)[C@@H]1O	103510952	Ahmed-Belkacem_2007	reported by Montanari_2014	INHIBITOR	1
1446	O1c2cc(ccc2OC1)-c1nn2c(N=C(C)C(C)=C2N2CCN(CC2)C(=O)c2ccoc2)c1	93619255	Ivnitski-Steele_2010	reported by Montanari_2014	INHIBITOR	1
1447	O=C(N)N1c2c(C=Cc3c1cccc3)cccc2	Carbamazepine	Matsson_2007	reported by Montanari_2014	INACTIVE	0
1448	O=C(N1CCN(CC1)C=1n2nc(cc2N=C(C=1)c1ccccc1)-c1ccccc1)C	99361143	Ivnitski-Steele_2010	reported by Montanari_2014	INHIBITOR	1
1449	O=C(N1CCN(CC1)c1cc(N[C@H](C)c2ccccc2)c([N+](=O)[O-])cc1)CC(C)C	17433307	Ivnitski-Steele_2008	reported by Montanari_2014	INACTIVE	0
1450	O=C(NCC1([NH+](C)C)CCCCC1)c1cc(N(C)C)ccc1	3715631	Ivnitski-Steele_2008	reported by Montanari_2014	INACTIVE	0
1451	O=C(N[C@@H](CC(=O)N)C(=O)N[C@H]([C@H](O)C[N@@H+]1C[C@@H]2[C@H](C[C@H]1C(=O)NC(C)(C)C)CCCC2)Cc1ccccc1)c1nc2c(cc1)cccc2	Saquinavir	Matsson_2007	reported by Montanari_2014	INHIBITOR	1
1452	O=C(N\N=C\1/CCCc2c/1[nH]c1c2cc([N+](=O)[O-])cc1)c1ccncc1	17432495	Ivnitski-Steele_2008	reported by Montanari_2014	INACTIVE	0
1453	O=C(Nc1c(cccc1C)C)[C@H]1[N@@H+](CCCC1)CCCC	Bupivacaine	Matsson_2007	reported by Montanari_2014	INACTIVE	0
1454	O=C(Nc1cc([N+](=O)[O-])c(cc1)C)Nc1ccccc1	17433969	Ivnitski-Steele_2008	reported by Montanari_2014	INACTIVE	0
1455	O=C(Nc1ccc(cc1)CC[N@@H+]1CCc2c(C1)cccc2)c1cc2c(nc1)cccc2	103569360	Pick_2008	reported by Montanari_2014	INHIBITOR	1
1456	O=C(Nc1ccc(cc1)CC[N@@H+]1CCc2c(C1)cccc2)c1ccc(N)cc1	103568842	Pick_2008	reported by Montanari_2014	INACTIVE	0
1457	O=C(Nc1ccc(cc1)CC[N@@H+]1CCc2c(C1)cccc2)c1ccc([N+](=O)[O-])cc1	103568920	Pick_2008	reported by Montanari_2014	INHIBITOR	1
1458	O=C(Nc1ccc(cc1)CC[N@@H+]1CCc2c(C1)cccc2)c1ccccc1N	103568952	Pick_2008	reported by Montanari_2014	INACTIVE	0
1459	O=C(Nc1ccc(cc1)CC[N@@H+]1CCc2c(C1)cccc2)c1ccccc1NC(=O)c1cc2c(nc1)cccc2	103545264	Pick_2008	reported by Montanari_2014	INHIBITOR	1
1460	O=C(Nc1ccc(cc1)CC[N@@H+]1CCc2c(C1)cccc2)c1ccccc1[N+](=O)[O-]	103568991	Pick_2008	reported by Montanari_2014	INACTIVE	0
1461	O=C(Nc1ccccc1N)Nc1ccc(cc1)CC[N@@H+]1CCc2c(C1)cccc2	103594944	Pick_2010	reported by Montanari_2014	INACTIVE	0
1462	O=C(Nc1ccccc1[N+](=O)[O-])Nc1ccc(cc1)CC[N@@H+]1CCc2c(C1)cccc2	103594882	Pick_2010	reported by Montanari_2014	INACTIVE	0
1463	O=C(Nc1n(nc(c1)C)-c1ccccc1)c1cc([N+](=O)[O-])cc([N+](=O)[O-])c1	22407122	Ivnitski-Steele_2008	reported by Montanari_2014	INACTIVE	0
1464	O=C(\C=C\c1ccccc1)c1ccccc1	Chalcone	flavonoids_Zhang_2005	reported by Montanari_2014	INHIBITOR	1
1465	O=C/1N(N=C(C)\C\1=C\N(C)C)c1ccc([N+](=O)[O-])cc1	17432956	Ivnitski-Steele_2008	reported by Montanari_2014	INACTIVE	0
1466	O=C1C2C[N@@H+]3CC1(C[N@H+](C2)CC3)C\C=C(\C)/C	4259641	Ivnitski-Steele_2008	reported by Montanari_2014	INACTIVE	0
1467	O=C1C=2C=3N=C(C=c4[nH]c(=Cc5[nH]c(C=C6N=C(C=3[C@H]1C(OC)=O)[C@@H](CCC(=O)[O-])[C@@H]6C)c(C)c5C=C)c(C)c4CC)C=2C	pheophorbide a	Saito_2006	reported by Montanari_2014	INHIBITOR	1
1468	O=C1C=C2CC[C@@H]3[C@@H]([C@]2(C=C1)C)C(=O)C[C@]1([C@H]3CC[C@]1(O)C(=O)CO)C	Prednisone	Matsson_2007	reported by Montanari_2014	INACTIVE	0
1469	O=C1C=C2CC[C@@H]3[C@@H]([C@]2(C=C1)C)[C@@H](O)C[C@]1([C@H]3CC[C@]1(O)C(=O)CO)C	Prednisolone	Matsson_2007	reported by Montanari_2014	INACTIVE	0
1470	O=C1CCC2=C3[C@H]([C@@H]4CC[C@@](O)(C#CC)[C@]4(C[C@@H]3c3ccc(N(C)C)cc3)C)CCC2=C1	Mifepristone	Matsson_2007	reported by Montanari_2014	INHIBITOR	1
1471	O=C1CC[C@@]2([C@@H]3[C@H]([C@@H]4CC[C@H](O)[C@]4(CC3)C)CCC2=C1)C	Testosterone	Matsson_2009	reported by Montanari_2014	INACTIVE	0
1472	O=C1CC[C@@]2([C@@H]3[C@H]([C@@H]4CC[C@](O)(C(=O)C)[C@]4(CC3)C)C[C@@H](C2=C1)C)C	Medroxyprogesterone	Matsson_2007	reported by Montanari_2014	INHIBITOR	1
1473	O=C1CC[C@@]2([C@@H]3[C@H]([C@@H]4CC[C@](O)(C(=O)CO)[C@]4(CC3=O)C)CCC2=C1)C	cortisone	Saito_2006	reported by Montanari_2014	INACTIVE	0
1474	O=C1CC[C@@]2([C@@H]3[C@H]([C@@H]4CC[C@](O)(C(=O)CO)[C@]4(C[C@@H]3O)C)CCC2=C1)C	Hydrocortisone	Matsson_2007	reported by Montanari_2014	INACTIVE	0
1475	O=C1N(C)C(=O)N(c2nc(n(c12)CCCCC)C[NH+]1CC[NH+](CC1)Cc1ccccc1)C	861697	Ivnitski-Steele_2008	reported by Montanari_2014	INACTIVE	0
1476	O=C1N(C)[C@@H]([C@H](O)[C@@H](C\C=C\C)C)C(=O)N[C@H](CC)C(=O)N(CC(=O)N(C)[C@H](CC(C)C)C(=O)N[C@@H](C(C)C)C(=O)N(C)[C@@H](CC(C)C)C(=O)N[C@@H](C)C(=O)N[C@H](C)C(=O)N(C)[C@H](CC(C)C)C(=O)N(C)[C@@H](CC(C)C)C(=O)N(C)[C@H]1C(C)C)C	103230651	Pick_2008	reported by Montanari_2014	INACTIVE	0
1477	O=C1N(Cc2c3c(ccc2)cccc3)C(=O)N[C@@H]1CCc1ccccc1	22407547	Ivnitski-Steele_2008	reported by Montanari_2014	INACTIVE	0
1478	O=C1N(N(C)C(=C1)C)c1ccccc1	Antipyrine	Matsson_2007	reported by Montanari_2014	INACTIVE	0
1479	O=C1N(N=C(C)[C@@H]1N=Nc1cc2c(cc1)cccc2)C(=O)c1ccncc1	NSC303769	Henrich_2007	reported by Montanari_2014	INHIBITOR	1
1480	O=C1N(c2c(N=C1\C=C(/O)\c1ccccc1)cccc2)c1ccccc1	14731086	Ivnitski-Steele_2008	reported by Montanari_2014	INACTIVE	0
1481	O=C1N2[C@H](Cc3c([nH]c4c3cccc4)[C@@H]2CC(C)C)C(=O)N[C@H]1CCC(OC(C)(C)C)=O	Ko134	Mao_2004	reported by Montanari_2014	INHIBITOR	1
1482	O=C1N2[C@H](Cc3c([nH]c4c3cccc4)[C@@H]2CC(C)C)C(=O)N[C@H]1CCCCNC(OC(C)(C)C)=O	Ko132	Mao_2004	reported by Montanari_2014	INHIBITOR	1
1483	O=C1N2[C@@H](Cc3c([nH]c4c3cccc4)[C@@H]2C(C)C)C(=O)N[C@H]1C	F1	Loevezijn_2001	reported by Montanari_2014	INACTIVE	0
1484	O=C1N2[C@@H](Cc3c([nH]c4c3cccc4)[C@@H]2C2CCCCC2)C(=O)N[C@H]1C	C1	Loevezijn_2001	reported by Montanari_2014	INACTIVE	0
1485	O=C1N2[C@@H](Cc3c([nH]c4c3cccc4)[C@@H]2C2CCCCC2)C(=O)N[C@H]1CCC(OC(C)(C)C)=O	C6	Loevezijn_2001	reported by Montanari_2014	INHIBITOR	1
1486	O=C1N2[C@@H](Cc3c([nH]c4c3cccc4)[C@@H]2C2CCCCC2)C(=O)N[C@H]1CCCC[NH2+]C(OC(OC(OC(C)(C)C)=O)=O)(C)C	C4	Loevezijn_2001	reported by Montanari_2014	INHIBITOR	1
1487	O=C1N2[C@@H](Cc3c([nH]c4c3cccc4)[C@@H]2C2CCCCC2)C(=O)N[C@@H]1COC(C)(C)C	C5	Loevezijn_2001	reported by Montanari_2014	INHIBITOR	1
1488	O=C1N2[C@@H](Cc3c([nH]c4c3cccc4)[C@@H]2C2CCCCC2)C(=O)N[C@H]1Cc1c2c([nH]c1)cccc2	C7	Loevezijn_2001	reported by Montanari_2014	INHIBITOR	1
1489	O=C1N2[C@@H](Cc3c([nH]c4c3cccc4)[C@@H]2CC(C)C)C(=O)N[C@H]1CCCC[NH2+]C(OC(OC(OC(C)(C)C)=O)=O)(C)C	E4	Loevezijn_2001	reported by Montanari_2014	INHIBITOR	1
1490	O=C1N2[C@@H](Cc3c([nH]c4c3cccc4)[C@@H]2CC(C)C)C(=O)N[C@@H]1COC(C)(C)C	E5	Loevezijn_2001	reported by Montanari_2014	INHIBITOR	1
1491	O=C1N2[C@@H](Cc3c([nH]c4c3cccc4)[C@@H]2CC(C)C)C(=O)N[C@H]1Cc1c2c([nH]c1)cccc2	E7	Loevezijn_2001	reported by Montanari_2014	INHIBITOR	1
1492	O=C1N2[C@@H](Cc3c([nH]c4c3cccc4)[C@@H]2CC(C)C)C(=O)N[C@H]1Cc1ccccc1	E3	Loevezijn_2001	reported by Montanari_2014	INHIBITOR	1
1493	O=C1N2[C@@H](Cc3c([nH]c4c3cccc4)[C@@H]2CC)C(=O)N[C@@H]1C	A1	Loevezijn_2001	reported by Montanari_2014	INACTIVE	0
1494	O=C1N2[C@@H](Cc3c([nH]c4c3cccc4)[C@@H]2CC)C(=O)N[C@@H]1COC(C)(C)C	A5	Loevezijn_2001	reported by Montanari_2014	INACTIVE	0
1495	O=C1N2[C@@H](Cc3c([nH]c4c3cccc4)[C@@H]2CC)C(=O)N[C@H]1Cc1ccccc1	A3	Loevezijn_2001	reported by Montanari_2014	INACTIVE	0
1496	O=C1N2[C@@H](Cc3c([nH]c4c3cccc4)[C@@H]2CCCCC)C(=O)N[C@H]1C	D1	Loevezijn_2001	reported by Montanari_2014	INHIBITOR	1
1497	O=C1N2[C@@H](Cc3c([nH]c4c3cccc4)[C@@H]2CCCCC)C(=O)N[C@H]1CCC(OC(C)(C)C)=O	D6	Loevezijn_2001	reported by Montanari_2014	INHIBITOR	1
1498	O=C1N2[C@@H](Cc3c([nH]c4c3cccc4)[C@@H]2CCCCC)C(=O)N[C@H]1CCCC[NH2+]C(OC(OC(OC(C)(C)C)=O)=O)(C)C	D4	Loevezijn_2001	reported by Montanari_2014	INHIBITOR	1
1499	O=C1N2[C@@H](Cc3c([nH]c4c3cccc4)[C@@H]2CCCCC)C(=O)N[C@@H]1COC(C)(C)C	D5	Loevezijn_2001	reported by Montanari_2014	INHIBITOR	1
1500	O=C1N2[C@@H](Cc3c([nH]c4c3cccc4)[C@@H]2CCCCC)C(=O)N[C@H]1Cc1c2c([nH]c1)cccc2	D7	Loevezijn_2001	reported by Montanari_2014	INHIBITOR	1
1501	O=C1N2[C@@H](Cc3c([nH]c4c3cccc4)[C@@H]2CCCCC)C(=O)N[C@H]1Cc1ccccc1	D3	Loevezijn_2001	reported by Montanari_2014	INHIBITOR	1
1502	O=C1N2[C@@H](Cc3c([nH]c4c3cccc4)[C@@H]2c2ccccc2)C(=O)N[C@H]1C	B1	Loevezijn_2001	reported by Montanari_2014	INACTIVE	0
1503	O=C1N=C(Nc2n(cnc12)COC(CO)CO)N	Ganciclovir	Matsson_2007	reported by Montanari_2014	INACTIVE	0
1504	O=C1N=C(Nc2n(cnc12)CO[C@@H](COC(=O)[C@@H]([NH3+])C(C)C)CO)N	Valganciclovir	Matsson_2007	reported by Montanari_2014	INACTIVE	0
1505	O=C1N=C(Nc2n(cnc12)COCCO)N	Acyclovir	Matsson_2007	reported by Montanari_2014	INACTIVE	0
1506	O=C1N=C(Nc2n(cnc12)COCCOC(=O)[C@@H]([NH3+])C(C)C)N	Valacyclovir	Matsson_2007	reported by Montanari_2014	INACTIVE	0
1507	O=C1N=C(Nc2ncc(nc12)CNc1ccc(cc1)C(=O)N[C@@H](CCC(=O)[O-])C(=O)[O-])N	Folic acid	Matsson_2007	reported by Montanari_2014	INACTIVE	0
1508	O=C1NC(=O)NC(=O)C1(CC)c1ccccc1	Phenobarbital	Matsson_2009	reported by Montanari_2014	INACTIVE	0
1509	O=C1NC(=O)NC1(c1ccccc1)c1ccccc1	Phenytoin	Matsson_2007	reported by Montanari_2014	INACTIVE	0
1510	O=C1NC(C[NH2+]Cc2ccc(cc2)C)=C(C(OCC)=O)[C@H](N1)c1cc(ccc1C)C	14730345	Ivnitski-Steele_2008	reported by Montanari_2014	INACTIVE	0
1511	O=C1[N-][N@+]2(CCC[CH-]2)C(=O)N2[C@H]1Cc1c([nH]c3c1cccc3)[C@@H]2C(C)C	F2	Loevezijn_2001	reported by Montanari_2014	INACTIVE	0
1512	O=C1[N-][N@+]2(CCC[CH-]2)C(=O)N2[C@H]1Cc1c([nH]c3c1cccc3)[C@@H]2CC(C)C	E2	Loevezijn_2001	reported by Montanari_2014	INACTIVE	0
1513	O=C1[N-][N@+]2(CCC[CH-]2)C(=O)N2[C@H]1Cc1c([nH]c3c1cccc3)[C@@H]2c1ccccc1	B2	Loevezijn_2001	reported by Montanari_2014	INACTIVE	0
1514	O=C1[N-][N+]2(CCCC2)C(=O)N2[C@H]1Cc1c([nH]c3c1cccc3)[C@@H]2CC	A2	Loevezijn_2001	reported by Montanari_2014	INACTIVE	0
1515	O=C\1N(c2cc(ccc2)C)C(=O)NC(=O)/C/1=C\c1cc2CCCN(c2cc1)Cc1ccccc1	17514053	Ivnitski-Steele_2008	reported by Montanari_2014	INACTIVE	0
1516	O=C\1c2c(ccc(c2)C(=O)[O-])C(=O)/C/1=C/c1ccc(N(CC)CC)cc1	17508313	Ivnitski-Steele_2008	reported by Montanari_2014	INACTIVE	0
1517	O=[N+]([O-])c1cc(N2CCN(CC2)c2nc(nc3c2cccc3)-c2ccccc2)ccc1	23	phenylquinazolines_Juvale_2012	reported by Montanari_2014	INHIBITOR	1
1518	O=[N+]([O-])c1cc2nc(NC)c(nc2cc1[N+](=O)[O-])NC	17432150	Ivnitski-Steele_2008	reported by Montanari_2014	INHIBITOR	1
1519	O=[N+]([O-])c1ccc(N2CCCCC2)cc1C	22405391	Ivnitski-Steele_2008	reported by Montanari_2014	INACTIVE	0
1520	O=[N+]([O-])c1ccc(N2CCN(CC2)c2nc(nc3c2cccc3)-c2ccccc2)cc1	24	phenylquinazolines_Juvale_2012	reported by Montanari_2014	INHIBITOR	1
1521	O=[N+]([O-])c1ccc(Nc2nc(nc3c2cccc3)-c2ccccc2)cc1	13	phenylquinazolines_Juvale_2012	reported by Montanari_2014	INHIBITOR	1
1522	O=[N+]([O-])c1ccccc1Nc1nc(nc2c1cccc2)-c1ccccc1	11	phenylquinazolines_Juvale_2012	reported by Montanari_2014	INHIBITOR	1
1523	O=C([O-])/C(=C/c1cc(n(CC(C)C)c1C)C)/C#N	22406303	Ivnitski-Steele_2008	reported by Montanari_2014	INACTIVE	0
1524	O=C([O-])[C@@H](C)c1ccc(cc1)CC(C)C	ibuprofen	Saito_2006	reported by Montanari_2014	INACTIVE	0
1525	O=C([O-])C(CCC)CCC	Valproic acid	Matsson_2009	reported by Montanari_2014	INACTIVE	0
1526	O=C([O-])CCC[NH3+]	GABA	Saito_2006	reported by Montanari_2014	INACTIVE	0
1527	O=C([O-])CC[C@H]([NH3+])C(=O)[O-]	glutamic acid	Saito_2006	reported by Montanari_2014	INACTIVE	0
1528	O=C([O-])C[NH3+]	Glycine	Saito_2006	reported by Montanari_2014	INACTIVE	0
1529	O=C(NCC(=O)[O-])c1ccc(N)cc1	p-aminohippuric acid	Saito_2006	reported by Montanari_2014	INACTIVE	0
1530	O=C([O-])c1ccc(cc1)\C=N\N=C/1\c2c(-c3c\1cccc3)cccc2	NSC120688	Henrich_2007	reported by Montanari_2014	INHIBITOR	1
1531	O=C([O-])CCC=1C\2=N\C(=C/c3[nH]c(C=c4[nH]c(=CC5=N\C(=C/2)\C(CCC(=O)[O-])=C5C)c(C)c4[C@H](O)C)c(C)c3[C@H](O)C)\C=1C	hematoporphyrin	Saito_2006	reported by Montanari_2014	INHIBITOR	1
1532	OC(C1CC[NH+](CC1)CCC[C@H](O)c1ccc(cc1)C(C(=O)[O-])(C)C)(c1ccccc1)c1ccccc1	Fexofenadine	Matsson_2007	reported by Montanari_2014	INACTIVE	0
1533	O=C([O-])C[C@@H](O)C[N+](C)(C)C	Carnitine	Matsson_2009	reported by Montanari_2014	INACTIVE	0
1534	O[C@](CC[NH+]1CCCC1)(C1CCCCC1)c1ccccc1	Procyclidine	Matsson_2007	reported by Montanari_2014	INACTIVE	0
1535	Oc1c2c(ccc1)[C@@](O)([C@H]1C(C(=O)[C@@]3(O)[C@H](C1)[C@H]([NH+](C)C)C(=O)C(C(=O)N)=C3[O-])=C2[O-])C	Tetracycline	Matsson_2009	reported by Montanari_2014	INACTIVE	0
1536	Oc1c2c(ccc1)[C@@](O)([C@@H]1C(C(=O)[C@@]3(O)[C@@H](C1)[C@H]([NH+](C)C)C(=O)/C(=C(/[O-])\N)/C3=O)=C2[O-])C	Tetracycline	Matsson_2007	reported by Montanari_2014	INACTIVE	0
1537	OCC[C@H]1[N@@H+](CC[N@H+](C1)Cc1ccc(cc1)C#CCCO)Cc1ccccc1	24799040	Ivnitski-Steele_2008	reported by Montanari_2014	INACTIVE	0
1538	OCCCNc1nc(NCc2ccccc2)c2ncn(c2n1)C(C)C	Bohemine	cdkinhib_An_2008	reported by Montanari_2014	INHIBITOR	1
1539	OCCN(CCO)c1nc(N2CCCCC2)c2nc(nc(N3CCCCC3)c2n1)N(CCO)CCO	Dipyridamole	Matsson_2007	reported by Montanari_2014	INHIBITOR	1
1540	OCCNc1nc(NCc2ccccc2)c2ncn(c2n1)C	Olomoucine	cdkinhib_An_2008	reported by Montanari_2014	INACTIVE	0
1541	OCCc1ccc(NC(=O)c2cc(NC(=O)c3ccc([N+](=O)[O-])cc3)ccc2)cc1	5	Marighetti_2013	reported by Montanari_2014	INACTIVE	0
1542	OCCc1ccc(NC(=O)c2cc(ccc2NC(=O)c2ccc([N+](=O)[O-])cc2)C)cc1	11	Marighetti_2013	reported by Montanari_2014	INHIBITOR	1
1543	OCCc1ccc(NC(=O)c2ccc(NC(=O)c3ccc([N+](=O)[O-])cc3)cc2)cc1	6	Marighetti_2013	reported by Montanari_2014	INACTIVE	0
1544	OCCc1ccc(NC(=O)c2ccc(cc2NC(=O)c2ccc([N+](=O)[O-])cc2)C)cc1	10	Marighetti_2013	reported by Montanari_2014	INHIBITOR	1
1545	OCCc1ccc(NC(=O)c2ccccc2NC(=O)C)cc1	15	Marighetti_2013	reported by Montanari_2014	INACTIVE	0
1546	OCCc1ccc(NC(=O)c2ccccc2NC(=O)C2CCCCC2)cc1	14	Marighetti_2013	reported by Montanari_2014	INACTIVE	0
1547	OCCc1ccc(NC(=O)c2ccccc2NC(=O)c2cc(N)ccc2)cc1	17	Marighetti_2013	reported by Montanari_2014	INHIBITOR	1
1548	OCCc1ccc(NC(=O)c2ccccc2NC(=O)c2ccc(N)cc2)cc1	18	Marighetti_2013	reported by Montanari_2014	INHIBITOR	1
1549	OCCc1ccc(NC(=O)c2ccccc2NC(=O)c2ccc([N+](=O)[O-])cc2)cc1	4	Marighetti_2013	reported by Montanari_2014	INHIBITOR	1
1550	OCCc1ccc(NC(=O)c2ccccc2NC(=O)c2ccc(cc2)C#N)cc1	19	Marighetti_2013	reported by Montanari_2014	INHIBITOR	1
1551	OCCc1ccc(NC(=O)c2ccccc2NC(=O)c2ccc(cc2)C(C)(C)C)cc1	24	Marighetti_2013	reported by Montanari_2014	INHIBITOR	1
1552	OCCc1ccc(NC(=O)c2ccccc2NC(=O)c2ccc(cc2)C)cc1	28	Marighetti_2013	reported by Montanari_2014	INHIBITOR	1
1553	OC[C@H](Nc1nc(NCc2ccccc2)c2ncn(c2n1)C(C)C)CC	Roscovitine	cdkinhib_An_2008	reported by Montanari_2014	INHIBITOR	1
1554	OC[C@H]1C[C@@H](n2c3nc(nc(NC4CC4)c3nc2)N)C=C1	Abacavir	Weiss_2007	reported by Montanari_2014	INACTIVE	0
1555	O[C@@H]1CC[C@]2([C@@H](C1)C[C@@H](O)[C@H]1[C@@H]3CC[C@H]([C@@H](CCC(=O)[O-])C)[C@]3(CC[C@@H]12)C)C	Chenodeoxycholic acid	Matsson_2007	reported by Montanari_2014	INACTIVE	0
1556	O[C@@H]1Cc2c(cccc2)[C@@H]1NC(=O)[C@H](Cc1ccccc1)C[C@H](O)C[N@@H+]1CC[N@H+](C[C@H]1C(=O)NC(C)(C)C)Cc1cccnc1	Indinavir	Matsson_2009	reported by Montanari_2014	INACTIVE	0
1557	O[C@H]1CC[C@]2([C@@H](CC[C@@H]3[C@@H]2C[C@@H](O)[C@]2(C)[C@@]3(CC[C@@H]2[C@@](O)(CC\C=C(\C)/C)C)C)C1(C)C)C	30636-90-9	Jin_2006	reported by Montanari_2014	INHIBITOR	1
1558	O[C@H]1CC[C@]2([C@@H]([C@@H](O)C[C@@]3([C@@H]2C[C@@H](O)[C@H]2[C@@]3(CC[C@@H]2[C@@](O)(CC\C=C(\C)/C)C)C)C)C1(C)C)C	34080-08-5	Jin_2006	reported by Montanari_2014	INHIBITOR	1
1559	O[C@H]1C[C@H]2[C@H]([C@@H]3CC[C@H]([C@@H](CCC(=O)[O-])C)[C@@]13C)[C@H](O)C[C@@H]1C[C@H](O)CC[C@@]12C	Cholic acid	Matsson_2009	reported by Montanari_2014	INACTIVE	0
1560	Oc1c2c(Nc3c(cccc3)C2=O)ccc1	2a	acridones_Boumendjel_2007	reported by Montanari_2014	INACTIVE	0
1561	Oc1c2c(ccc1C(=O)\C=C\c1ccccc1)cccc2	136929452	Juvale_2012	reported by Montanari_2014	INHIBITOR	1
1562	Oc1c2c3c(c4c1cccc4)\C(=N\CCCC)\C(=O)N(c3ccc2)C	14723512	Ivnitski-Steele_2008	reported by Montanari_2014	INACTIVE	0
1563	Oc1c2c3c(c4c1cccc4)\C(=N\CCO)\C(=O)N(c3ccc2)C	848038	Ivnitski-Steele_2008	reported by Montanari_2014	INACTIVE	0
1564	Oc1c2c3c(c4c1cccc4)\C(=N\CCc1ccccc1)\C(=O)N(c3ccc2)C	14742165	Ivnitski-Steele_2008	reported by Montanari_2014	INACTIVE	0
1565	Oc1cc(O)ccc1C(=O)\C=C\c1ccccc1	103323399	Juvale_2012	reported by Montanari_2014	INACTIVE	0
1566	Oc1cc(cc(O)c1[C@H]1C=C(CC[C@H]1C(C)=C)C)CCCCC	cannabidiol	Holland_2007	reported by Montanari_2014	INHIBITOR	1
1567	Oc1cc(ccc1O)[C@@H](O)C[NH3+]	norepinephrine	Saito_2006	reported by Montanari_2014	INACTIVE	0
1568	Oc1cc(ccc1O)CC[NH3+]	dopamine	Saito_2006	reported by Montanari_2014	INACTIVE	0
1569	Oc1cc(ccc1O)C[C@H]([NH3+])C(=O)[O-]	Levodopa	Matsson_2007	reported by Montanari_2014	INACTIVE	0
1570	Oc1cc(ccc1O)[C@@H](O)C[NH2+]C	epinephrine	Saito_2006	reported by Montanari_2014	INACTIVE	0
1571	Oc1cc(ccc1O)\C=C(/OC)\C(=O)N\C=C\c1ccc(O)cc1	103728140	Takada_2010	reported by Montanari_2014	INHIBITOR	1
1572	Oc1cc2CC[C@H]3[C@@H]4CC[C@@](O)(C#C)[C@]4(CC[C@@H]3c2cc1)C	Ethinylestradiol	Matsson_2007	reported by Montanari_2014	INHIBITOR	1
1573	Oc1cc2CC[C@H]3[C@@H]4CC[C@H](O)[C@]4(CC[C@@H]3c2cc1)C	beta-Estradiol	Matsson_2007	reported by Montanari_2014	INHIBITOR	1
1574	Oc1cc2c(Nc3c(cccc3)C2=O)cc1	2b	acridones_Boumendjel_2007	reported by Montanari_2014	INACTIVE	0
1575	Oc1cc2c([nH]cc2CC[NH3+])cc1	serotonin	Saito_2006	reported by Montanari_2014	INACTIVE	0
1576	Oc1ccc(N)cc1C(=O)[O-]	Mesalazine	Matsson_2007	reported by Montanari_2014	INACTIVE	0
1577	Oc1ccc(cc1)/C(=C(\CC)/c1ccc(O)cc1)/CC	Diethylstilbestrol	Matsson_2007	reported by Montanari_2014	INHIBITOR	1
1578	Oc1ccc(cc1)\C=C(/OC)\C(=O)NC[C@@H](O)c1ccc(O)cc1	103728075	Takada_2010	reported by Montanari_2014	INACTIVE	0
1579	Oc1ccc(cc1)CCNC(=O)[C@H](OC)Cc1ccc(O)cc1	103728073	Takada_2010	reported by Montanari_2014	INACTIVE	0
1580	Oc1ccc(cc1)C[C@@H](OC)C(=O)N\C=C\c1ccc(O)cc1	103727991	Takada_2010	reported by Montanari_2014	INACTIVE	0
1581	Oc1ccc(cc1)CCNC(=O)/C(/OC)=C/c1ccc(O)cc1	103727992	Takada_2010	reported by Montanari_2014	INACTIVE	0
1582	Oc1ccc(cc1)\C=C(/OC)\C(=O)[O-]	103728076	Takada_2010	reported by Montanari_2014	INACTIVE	0
1583	Oc1ccc(cc1)\C=C\C(=O)N\C=C\c1ccc(O)cc1	103728074	Takada_2010	reported by Montanari_2014	INACTIVE	0
1584	Oc1ccc(cc1)\C=C\NC(=O)/C(/OC)=C/c1ccccc1	103728077	Takada_2010	reported by Montanari_2014	INHIBITOR	1
1585	Oc1ccc2c(cccc2)c1C(=O)\C=C\c1ccccc1	136929454	Juvale_2012	reported by Montanari_2014	INHIBITOR	1
1586	Oc1n(c2c(cccc2)c1N=Nc1ncccc1)CCC(C)C	22409439	Ivnitski-Steele_2008	reported by Montanari_2014	INACTIVE	0
1587	Oc1n(c2c(cccc2)c1N=Nc1ncccc1)CCCC	22408848	Ivnitski-Steele_2008	reported by Montanari_2014	INHIBITOR	1
1588	Oc1n[nH]c(c1)-c1ccccc1	14723529	Ivnitski-Steele_2008	reported by Montanari_2014	INACTIVE	0
1589	P(=O)(Nc1cc(ccc1)C(F)(F)F)(N(CC)CC)c1ccc(N(C)C)cc1NC(=O)c1occc1	24826880	Ivnitski-Steele_2008	reported by Montanari_2014	INACTIVE	0
1590	P(=O)([O-])([O-])CO[C@@H](Cn1c2ncnc(N)c2nc1)C	Tenofovir	Weiss_2007	reported by Montanari_2014	INACTIVE	0
1591	P(O[C@@H](OC(=O)CC)C(C)C)(=O)(CCCCc1ccccc1)CC(=O)N1C[C@@H](C[C@H]1C(=O)[O-])C1CCCCC1	Fosinopril	Pan_2013	reported by Montanari_2014	INHIBITOR	1
1592	S(=O)(=O)(C(F)(F)F)c1cc([N+](=O)[O-])c(Nc2ccc(NC(=O)C)cc2)cc1	22406046	Ivnitski-Steele_2008	reported by Montanari_2014	INHIBITOR	1
1593	S(=O)(=O)(CCOc1ccc(cc1)\C(=C(\CC)/c1ccccc1)\c1ccccc1)C	TAG-3	Sugimoto_2003	reported by Montanari_2014	INACTIVE	0
1594	S(=O)(=O)(CCn1c(ncc1[N+](=O)[O-])C)CC	Tinidazole	Matsson_2007	reported by Montanari_2014	INACTIVE	0
1595	S(=O)(=O)(N(CC(C)C)C[C@@H](O)[C@@H](NC(O[C@H]1CCOC1)=O)Cc1ccccc1)c1ccc(N)cc1	Amprenavir	Weiss_2007	reported by Montanari_2014	INACTIVE	0
1596	S(=O)(=O)(N(CC)CC)c1ccc(cc1)C(=O)N([C@@H]1C=CS(=O)(=O)C1)c1ccc(cc1)C	24837182	Ivnitski-Steele_2008	reported by Montanari_2014	INACTIVE	0
1597	S(=O)(=O)(N(CCC)CCC)c1ccc(cc1)C(=O)[O-]	Probenecid	Matsson_2009	reported by Montanari_2014	INACTIVE	0
1598	S(=O)(=O)(N)c1cc2S(=O)(=O)N[C@H](Nc2cc1C(F)(F)F)Cc1ccccc1	Bendroflumethiazide	Matsson_2007	reported by Montanari_2014	INACTIVE	0
1599	S(=O)(=O)(N)c1ccc(-n2nc(cc2-c2ccc(cc2)C)C(F)(F)F)cc1	Celecoxib	Matsson_2007	reported by Montanari_2014	INHIBITOR	1
1600	S(=O)(=O)(N1CCCCC1)c1cc(NC(=O)CCC2CCCCC2)ccc1OC	22406737	Ivnitski-Steele_2008	reported by Montanari_2014	INACTIVE	0
1601	S(=O)(=O)(N1CCOCC1)c1cc([N+](=O)[O-])ccc1N1CCN(CC1)c1ccccc1F	22410513	Ivnitski-Steele_2008	reported by Montanari_2014	INACTIVE	0
1602	S(=O)([O-])(=NC(=O)[N-]N1C[C@H]2[C@H](CCC2)C1)c1ccc(cc1)C	Gliclazide	Matsson_2007	reported by Montanari_2014	INACTIVE	0
1603	S(=O)(=O)(N[C@H](C(C)C)C(OCc1cc([N+](=O)[O-])cc2c1OCOC2)=O)c1ccccc1	22410905	Ivnitski-Steele_2008	reported by Montanari_2014	INACTIVE	0
1604	S(=O)(=O)(NC(C)C)c1ccc(NC(=O)c2cc(OC)c(OC)c(OC)c2)cc1	14736300	Ivnitski-Steele_2008	reported by Montanari_2014	INACTIVE	0
1605	S(=O)(=O)(Nc1cc(ccc1)[C@@H](CC)C=1C(=O)C[C@](OC=1[O-])(CCc1ccccc1)CCC)c1ncc(cc1)C(F)(F)F	Tipranavir	Matsson_2007	reported by Montanari_2014	INHIBITOR	1
1606	S(=O)(=O)(Nc1cc2cc([nH]c2cc1)C(=O)N1CCN(CC1)c1ncccc1NC(C)C)C	103181784	Zembruski_2011	reported by Montanari_2014	INHIBITOR	1
1607	S(=O)(=O)(Nc1ccc(cc1)C(=O)N1CCN(CC1)c1ccc(OC)cc1)c1ccccc1	4261027	Ivnitski-Steele_2008	reported by Montanari_2014	INACTIVE	0
1608	S(=O)(=O)(Nc1ccc(cc1)[C@@H](O)C[NH2+]C(C)C)C	Sotalol	Matsson_2007	reported by Montanari_2014	INACTIVE	0
1609	S(=O)(=O)(c1c[nH+]c2c(cc(OC)cc2)c1N1CCC2(OCCO2)CC1)c1ccc(OC)cc1	17515444	Ivnitski-Steele_2008	reported by Montanari_2014	INACTIVE	0
1610	S(=O)(C)c1ccc(cc1)\C=C\1/c2c(cc(F)cc2)C(CC(=O)[O-])=C/1C	Sulindac	Matsson_2007	reported by Montanari_2014	INACTIVE	0
1611	S(=O)(CCC1C(=O)N(N(C1=O)c1ccccc1)c1ccccc1)c1ccccc1	Sulfinpyrazone	Matsson_2007	reported by Montanari_2014	INACTIVE	0
1612	S(=O)(Cc1ncc(C)c(OC)c1C)c1[nH]c2cc(OC)ccc2n1	Omeprazole	Matsson_2007	reported by Montanari_2014	INHIBITOR	1
1613	S(=O)(Cc1nccc(OCC(F)(F)F)c1C)c1[nH]c2c(n1)cccc2	Lansoprazole	Matsson_2007	reported by Montanari_2014	INACTIVE	0
1614	S(C(=O)C)[C@H]1[C@H]2[C@@H]3CC[C@]4(OC(=O)CC4)[C@]3(CC[C@@H]2[C@@]2(C(=CC(=O)CC2)C1)C)C	Spironolactone	Matsson_2007	reported by Montanari_2014	INACTIVE	0
1615	S([C@@H](C(=O)Nc1cc([N+](=O)[O-])ccc1OC)C)c1ccc(cc1)C	17433936	Ivnitski-Steele_2008	reported by Montanari_2014	INACTIVE	0
1616	S([C@@H](C(=O)Nc1cc(ccc1OC)C)c1ccccc1)c1ccccc1	17505034	Ivnitski-Steele_2008	reported by Montanari_2014	INACTIVE	0
1617	S(C)c1cc(OC)c(cc1)C(=O)Nc1ccccc1	14723542	Ivnitski-Steele_2008	reported by Montanari_2014	INACTIVE	0
1618	S(C)c1nc(C)c(C(OCC)=O)c(-c2ccccc2)c1C#N	22407034	Ivnitski-Steele_2008	reported by Montanari_2014	INACTIVE	0
1619	S(C)c1nc(N2CCCC2)c2c(CC(OC2)(C)C)c1C#N	857440	Ivnitski-Steele_2008	reported by Montanari_2014	INACTIVE	0
1620	S(CC(=O)NCCOC)C1=Nc2c(cc(OC)c(OC)c2)C(=O)N1CCC=1CCCCC=1	4252053	Ivnitski-Steele_2008	reported by Montanari_2014	INACTIVE	0
1621	S(CC(=O)Nc1ccc(cc1)CC)C1=Nc2c(cccc2)C(=O)N1CCCC(=O)N1CCCC1	14732224	Ivnitski-Steele_2008	reported by Montanari_2014	INACTIVE	0
1622	S(CC(=O)Nc1cccc(C)c1C)c1ncc(n1CCOC)-c1ccc(OC)cc1	17507726	Ivnitski-Steele_2008	reported by Montanari_2014	INACTIVE	0
1623	S(CC(=O)Nc1ccccc1)C1=Nc2nc3CCCCc3cc2C(=O)N1c1ccccc1C	17433981	Ivnitski-Steele_2008	reported by Montanari_2014	INACTIVE	0
1624	S(CC(=O)Nc1ccccc1OC)c1ncccc1C(=O)NCCCCCCCC	17509571	Ivnitski-Steele_2008	reported by Montanari_2014	INACTIVE	0
1625	S(CC(=O)c1cc(n(CCOC)c1C)C)c1nc(cc(C)c1C#N)C	4263775	Ivnitski-Steele_2008	reported by Montanari_2014	INACTIVE	0
1626	S(CC(=O)c1cc(n(CCOC)c1C)C)c1nc2c(cccc2)c(c1)C	17433839	Ivnitski-Steele_2008	reported by Montanari_2014	INACTIVE	0
1627	S(CC(OCC)=O)c1nc2c(cc1C#N)c(cc(c2)C)C	850979	Ivnitski-Steele_2008	reported by Montanari_2014	INACTIVE	0
1628	S(CC)C1=Nc2c(cc(OC)c(OC)c2)C(=O)N1CCc1ccccc1	14735861	Ivnitski-Steele_2008	reported by Montanari_2014	INACTIVE	0
1629	S(CC[C@@H](NC(=O)c1cc(OC)c(OC)c(OC)c1)C(OCc1cc([N+](=O)[O-])cc2c1OCOC2)=O)C	24826867	Ivnitski-Steele_2008	reported by Montanari_2014	INACTIVE	0
1630	S(CCCC)c1nnc(c2c1cccc2)-c1ccc(cc1)C	17504225	Ivnitski-Steele_2008	reported by Montanari_2014	INACTIVE	0
1631	S(CCOc1ccc(OC)cc1)c1nnc(n1CC=C)[C@H](NC(=O)c1ccc(OC)cc1)C(C)C	14734790	Ivnitski-Steele_2008	reported by Montanari_2014	INACTIVE	0
1632	S(CCOc1ccc(cc1)C)c1nc(nc(OCC)n1)N(C)C	857021	Ivnitski-Steele_2008	reported by Montanari_2014	INACTIVE	0
1633	S(C[C@H](NC(=O)c1cccc(O)c1C)[C@H](O)C[N@@H+]1C[C@@H]2[C@H](C[C@H]1C(=O)NC(C)(C)C)CCCC2)c1ccccc1	Nelfinavir	Mao_2004	reported by Montanari_2014	INHIBITOR	1
1634	S(Cc1c([N+](=O)[O-])cccc1F)c1nc(cc(C)c1C#N)C	17506370	Ivnitski-Steele_2008	reported by Montanari_2014	INHIBITOR	1
1635	S(Cc1ccccc1C)c1nc(c2cc(OC)ccc2n1)C	17506700	Ivnitski-Steele_2008	reported by Montanari_2014	INACTIVE	0
1636	S(Cc1nc[nH]c1C)CCN\C(=N\C)\NC#N	Cimetidine	Matsson_2007	reported by Montanari_2014	INACTIVE	0
1637	S(Cc1oc(cc1)C[NH+](C)C)CCN\C(\NC)=C\[N+](=O)[O-]	Ranitidine	Matsson_2007	reported by Montanari_2014	INACTIVE	0
1638	S(=O)(=O)([O-])CCNC(=O)CC[C@@H](C)[C@H]1CC[C@H]2[C@H]3[C@H](CC[C@]12C)[C@@]1([C@@H](C[C@H](O)CC1)CC3)C	Taurolithocholic acid	Matsson_2009	reported by Montanari_2014	INACTIVE	0
1639	S(Oc1cc2CC[C@@H]3[C@@H]4CCC(=O)[C@]4(CC[C@H]3c2cc1)C)(=O)(=O)[O-]	estrone-3-sulfate	Saito_2006	reported by Montanari_2014	INACTIVE	0
1640	S1/C(=C\C=C\2/N(c3c(cccc3)C/2(C)C)CC)/C(=O)N(CCC)C1=S	17387304 24807803	Ivnitski-Steele_2008 Ivnitski-Steele_2008	reported by Montanari_2014 reported by Montanari_2014	INACTIVE INACTIVE	0
1641	S1C(=Cc2c(c(OC)c(OC)cc2)C1=O)C(OC(C)C)=O	4245338	Ivnitski-Steele_2008	reported by Montanari_2014	INHIBITOR	1
1642	S1C2=Nc3c(NC(N4CC[NH+](CC4)C)=C2C=C1C)cccc3	Olanzapine	Wang_2008	reported by Montanari_2014	INACTIVE	0
1643	S1C[C@H](O[C@H]1CO)N1C=C(F)C(=NC1=O)N	Emtricitabin	Weiss_2007	reported by Montanari_2014	INACTIVE	0
1644	S1C[C@H](O[C@H]1CO)N1C=CC(=NC1=O)N	Lamivudine	Weiss_2007	reported by Montanari_2014	INACTIVE	0
1645	S1[C@H]2N(C(C(=O)[O-])=C(C1)CSc1nnnn1C)C(=O)[C@H]2NC(=O)[C@H](O)c1ccccc1	Cefamandole	Matsson_2009	reported by Montanari_2014	INACTIVE	0
1646	S1[C@H]2N([C@@H](C(=O)[O-])C1(C)C)C(=O)[C@H]2NC(=O)Cc1ccccc1	penicillin G	Saito_2006	reported by Montanari_2014	INACTIVE	0
1647	S1[C@H]2N([C@@H](C(=O)[O-])C1(C)C)C(=O)[C@H]2NC(=O)[C@H]([NH3+])c1ccc(O)cc1	Amoxicillin	Matsson_2007	reported by Montanari_2014	INACTIVE	0
1648	S1\C(=C/C=2C(=O)N3C(=NC=2NCCCOC(C)C)C(=CC=C3)C)\C(=O)N(CCC)C1=S	14741605	Ivnitski-Steele_2008	reported by Montanari_2014	INACTIVE	0
1649	S1\C(=C/C=2C(=O)N3C(=NC=2NCCCOCC)C(=CC=C3)C)\C(=O)N(CC(C)C)C1=S	14743476	Ivnitski-Steele_2008	reported by Montanari_2014	INACTIVE	0
1650	S1\C(=C/C=C/2\Oc3c(N\2CC)cccc3)\C(=O)N(CCCC)C1=S	24807099	Ivnitski-Steele_2008	reported by Montanari_2014	INACTIVE	0
1651	S1\C(=C/c2cc(OC)c(OCC(=O)[O-])cc2)\C(=O)C(C(OCC)=O)=C1Nc1ccc(OCC)cc1	22415019	Ivnitski-Steele_2008	reported by Montanari_2014	INACTIVE	0
1652	S1/C(=C\C=C\2/N(c3c(cccc3)C/2(C)C)C)/C(=O)N(CC=C)C1=S	17510327	Ivnitski-Steele_2008	reported by Montanari_2014	INACTIVE	0
1653	S1\C(=C\c2oc(N3CCOCC3)cc2)\C(=O)N(Cc2ccc(F)cc2)C1=O	14741197	Ivnitski-Steele_2008	reported by Montanari_2014	INACTIVE	0
1654	S1c2c(N(CC[NH+](C)C)C(=O)[C@H](OC(=O)C)[C@@H]1c1ccc(OC)cc1)cccc2	Diltiazem	Matsson_2007	reported by Montanari_2014	INACTIVE	0
1655	S1c2c(N(c3c1cccc3)C[C@H]([NH+](C)C)C)cccc2	Promethazine	Pan_2013	reported by Montanari_2014	INACTIVE	0
1656	S1c2c(N(c3c1cccc3)CCC[NH+]1CC[NH+](CC1)C)cc(cc2)C(F)(F)F	Trifluoperazine	Pan_2013	reported by Montanari_2014	INHIBITOR	1
1657	S1c2c(cc(cc2)C(F)(F)F)\C(\c2c1cccc2)=C/CC[NH+]1CC[NH+](CC1)CCO	Flupentixol	Matsson_2007	reported by Montanari_2014	INHIBITOR	1
1658	S1c2c(cccc2)C(=Nc2c1cccc2)N1CC[NH+](CC1)CCOCCO	Quetiapine	Wang_2008	reported by Montanari_2014	INACTIVE	0
1659	S=C(N=Nc1c2cc(F)ccc2[nH]c1O)N	17504567	Ivnitski-Steele_2008	reported by Montanari_2014	INACTIVE	0
1660	S=C(Nc1ccc(OC)cc1)NCc1n(ccc1)C	24815209	Ivnitski-Steele_2008	reported by Montanari_2014	INACTIVE	0
1661	S=C1NC=CN1C	Methimazole	Matsson_2007	reported by Montanari_2014	INACTIVE	0
1662	S=C1N\C(=C/c2cc(C)c(N3CCCC3)cc2)\C(=O)N1CCC	17387979	Ivnitski-Steele_2008	reported by Montanari_2014	INACTIVE	0
1663	S=C1N\C(=C/c2ccc(N3CCCC3)cc2)\C(=O)N1CC	17433473	Ivnitski-Steele_2008	reported by Montanari_2014	INACTIVE	0
1664	S=C1Nc2c(cccc2)C(=O)N1[C@@H](Cc1ccccc1)CC	24788565	Ivnitski-Steele_2008	reported by Montanari_2014	INACTIVE	0
1665	S=C1Nc2c(cccc2)C(=O)N1CC1CCC(CC1)C(=O)N1CCN(CC1)c1ccc(OC)cc1	4245654	Ivnitski-Steele_2008	reported by Montanari_2014	INACTIVE	0
1666	S=C=NCCc1ccccc1	Phenylethyl isothiocyanate	Matsson_2009	reported by Montanari_2014	INACTIVE	0
1667	SC[C@H](C(=O)N1CCC[C@H]1C(=O)[O-])C	Captopril	Matsson_2007	reported by Montanari_2014	INACTIVE	0
1668	S\1C=2N([C@H]3c4c(O[C@](N=2)(C)[C@H]3C(OC)=O)cccc4)C(=O)/C/1=C\c1cn(nc1C)CC	24785653	Ivnitski-Steele_2008	reported by Montanari_2014	INACTIVE	0
1669	S\1\C(=C/c2cc(OC)c(N3CCCC3)cc2OC)\C(=O)N(CC)/C/1=N\CC	22405312	Ivnitski-Steele_2008	reported by Montanari_2014	INACTIVE	0
1670	S\1\C(=C/c2cc(OC)c(N3CCCC3)cc2OC)\C(=O)N(CCCOC)/C/1=N\c1ccccc1	17387056	Ivnitski-Steele_2008	reported by Montanari_2014	INACTIVE	0
1671	S\1\C(=C/c2cc(OC)c(N3CCCC3)cc2OC)\C(=O)N(CCOC)/C/1=N/c1ccccc1	17387063	Ivnitski-Steele_2008	reported by Montanari_2014	INACTIVE	0
1672	S\1\C(=C/c2oc(N3CCOCC3)cc2)\C(=O)N(CCc2c3c([nH]c2)cccc3)/C/1=N/c1ccccc1	17401132	Ivnitski-Steele_2008	reported by Montanari_2014	INACTIVE	0
1673	S\1\C(=C\c2oc(cc2)-c2ccc([N+](=O)[O-])cc2)\C(=O)N(CC(=O)NCCC)/C/1=C/C(=O)C(C)(C)C	22402851	Ivnitski-Steele_2008	reported by Montanari_2014	INACTIVE	0
1674	S\1c2n(c(nn2)-c2ccccc2C)C(=O)/C/1=C\c1ccc(N(CC)CC)cc1	14742829	Ivnitski-Steele_2008	reported by Montanari_2014	INACTIVE	0
1675	S\1c2n(c3c(n2)cccc3)C(=O)/C/1=C\c1cccnc1	4265401	Ivnitski-Steele_2008	reported by Montanari_2014	INACTIVE	0
1676	S\1c2n(nc(n2)-c2ccccc2)C(=O)/C/1=C/c1ccc(N(C)C)cc1	4244400	Ivnitski-Steele_2008	reported by Montanari_2014	INACTIVE	0
1677	Sc1nnc(n1-c1cc2c(nccc2)cc1)-c1nc2c(cc1)cccc2	17513219	Ivnitski-Steele_2008	reported by Montanari_2014	INACTIVE	0
1678	[NH3+]CCc1nc[nH]c1	histamine	Saito_2006	reported by Montanari_2014	INACTIVE	0
1679	[NH+]1(CCN(CC1)c1nc(nc2c1cccc2)-c1ncccc1)Cc1ccccc1	860473	Ivnitski-Steele_2008	reported by Montanari_2014	INACTIVE	0
1680	n1c(nc2c(cccc2)c1N1CCN(CC1)c1ccccc1)-c1ccccc1	18	phenylquinazolines_Juvale_2012	reported by Montanari_2014	INHIBITOR	1
1681	n1c(nc2c(cccc2)c1Nc1ccccc1)-c1ccccc1	1	phenylquinazolines_Juvale_2012	reported by Montanari_2014	INHIBITOR	1
1682	[N@H+]1(CCC[C@H]1c1cccnc1)C	Nicotine	Matsson_2009	reported by Montanari_2014	INACTIVE	0
1683	[nH+]1ccc(N\C(=N\[C@@H](C(C)(C)C)C)\NC#N)cc1	pinacidil	Saito_2006	reported by Montanari_2014	INACTIVE	0
1684	n1ncc2c(cccc2)c1NN	Hydralazine	Matsson_2007	reported by Montanari_2014	INACTIVE	0
1685	o1[n+]([O-])c2CCc3n(OC)c(nc3-c2n1)-c1ccccc1	14742256	Ivnitski-Steele_2008	reported by Montanari_2014	INACTIVE	0
1686	o1c(C)c(cc1C)C(=O)N1CCN(CC1)C=1n2nc(cc2N=C(C=1)c1occc1)-c1ccccc1	96022053	Ivnitski-Steele_2010	reported by Montanari_2014	INHIBITOR	1
1687	o1c(C)c(cc1C)C(OCC(=O)c1cc(OC)ccc1OC)=O	3713915	Ivnitski-Steele_2008	reported by Montanari_2014	INACTIVE	0
1688	o1c(ccc1C)C1=Nc2n(nc(c2)-c2ccccc2)C(N2CCN(CC2)C(=O)c2ccoc2)=C1	99361158	Ivnitski-Steele_2010	reported by Montanari_2014	INHIBITOR	1
1689	o1c(ccc1COc1ccc(OCC)cc1)C(OCc1ncccc1)=O	851215	Ivnitski-Steele_2008	reported by Montanari_2014	INACTIVE	0
1690	o1c(ccc1Cn1ncc([N+](=O)[O-])c1)C(=O)Nc1cc(OC)ccc1	22411662	Ivnitski-Steele_2008	reported by Montanari_2014	INACTIVE	0
1691	o1c(ccc1N1CCCCC1)\C=C(/C(=O)Nc1cc2c(cc1)cccc2)\C#N	17512364	Ivnitski-Steele_2008	reported by Montanari_2014	INACTIVE	0
1692	o1c(ccc1[N+](=O)[O-])\C=C(\C#N)/c1[nH]c2c(n1)cc(cc2)C	17413739	Ivnitski-Steele_2008	reported by Montanari_2014	INACTIVE	0
1693	o1c(ccc1[N+](=O)[O-])\C=N\N1CC(=O)NC1=O	Nitrofurantoin	Matsson_2007	reported by Montanari_2014	INACTIVE	0
1694	o1c2c(c3c1cccc3)cc1c(NC(=O)C=C1C)c2	NSC375985	Henrich_2007	reported by Montanari_2014	INHIBITOR	1
1695	o1c2nc3cc(OC)ccc3cc2cc1C(=O)Nc1ccccc1N1CC[NH+](CC1)C	4242633	Ivnitski-Steele_2008	reported by Montanari_2014	INACTIVE	0
1696	o1cc(cc1)C(=O)N1CCN(CC1)C=1n2nc(cc2N=C(C)C=1C(C)C)-c1cc(OC)ccc1	97301788	Ivnitski-Steele_2010	reported by Montanari_2014	INHIBITOR	1
1697	o1cc(cc1)C(=O)N1CCN(CC1)C=1n2nc(cc2N=C(C)C=1C)-c1cc(OC)cc(OC)c1	93619254	Ivnitski-Steele_2010	reported by Montanari_2014	INHIBITOR	1
1698	o1cc(cc1)C(=O)N1CCN(CC1)C=1n2nc(cc2N=C(C)C=1C)-c1cc(OC)ccc1	88095705	Ivnitski-Steele_2010	reported by Montanari_2014	INHIBITOR	1
1699	o1cc(cc1)C(=O)N1CCN(CC1)C=1n2nc(cc2N=C(C)C=1C)-c1ccc(OC)cc1	87557809	Ivnitski-Steele_2010	reported by Montanari_2014	INHIBITOR	1
1700	o1cc(cc1)C(=O)N1CCN(CC1)C=1n2nc(cc2N=C(C)C=1C)-c1ccccc1	87557810	Ivnitski-Steele_2010	reported by Montanari_2014	INHIBITOR	1
1701	o1cc(cc1)C(=O)N1CCN(CC1)C=1n2nc(cc2N=C(C)C=1C)-c1ccncc1	92123917	Ivnitski-Steele_2010	reported by Montanari_2014	INHIBITOR	1
1702	o1cc(cc1)C(=O)N1CCN(CC1)C=1n2nc(cc2N=C(C)C=1CC)-c1cc(OC)ccc1	93619265	Ivnitski-Steele_2010	reported by Montanari_2014	INHIBITOR	1
1703	o1cc(cc1)C(=O)N1CCN(CC1)C=1n2nc(cc2N=C(C=1)C(C)(C)C)-c1ccccc1	99361157	Ivnitski-Steele_2010	reported by Montanari_2014	INHIBITOR	1
1704	o1cc(cc1)C(=O)N1CCN(CC1)C=1n2nc(cc2N=C(C=1)C)-c1cc(OC)ccc1	87550707	Ivnitski-Steele_2010	reported by Montanari_2014	INHIBITOR	1
1705	o1cc(cc1)C(=O)N1CCN(CC1)C=1n2nc(cc2N=C(C=1)C)-c1ccccc1	87357354	Ivnitski-Steele_2010	reported by Montanari_2014	INHIBITOR	1
1706	o1cc(cc1)C(=O)N1CCN(CC1)C=1n2nc(cc2N=C(C=1)C)-c1ccncc1	90944693	Ivnitski-Steele_2010	reported by Montanari_2014	INHIBITOR	1
1707	o1cc(cc1)C(=O)N1CCN(CC1)C=1n2nc(cc2N=C(C=1)c1cc(OC)ccc1)-c1cc(OC)ccc1	93619256	Ivnitski-Steele_2010	reported by Montanari_2014	INHIBITOR	1
1708	o1cc(cc1)C(=O)N1CCN(CC1)C=1n2nc(cc2N=C(C=1)c1cc(OC)ccc1)-c1ccccc1	99361148	Ivnitski-Steele_2010	reported by Montanari_2014	INHIBITOR	1
1709	o1cc(cc1)C(=O)N1CCN(CC1)C=1n2nc(cc2N=C(C=1)c1cc(ccc1)C#N)-c1cc(OC)ccc1	93619267	Ivnitski-Steele_2010	reported by Montanari_2014	INHIBITOR	1
1710	o1cc(cc1)C(=O)N1CCN(CC1)C=1n2nc(cc2N=C(C=1)c1cc(ccc1)C(OC)=O)-c1cc(OC)ccc1	96022046	Ivnitski-Steele_2010	reported by Montanari_2014	INHIBITOR	1
1711	o1cc(cc1)C(=O)N1CCN(CC1)C=1n2nc(cc2N=C(C=1)c1ccc(OC)cc1)-c1ccccc1	99361144	Ivnitski-Steele_2010	reported by Montanari_2014	INHIBITOR	1
1712	o1cc(cc1)C(=O)N1CCN(CC1)C=1n2nc(cc2N=C(C=1)c1ccccc1)-c1cc(OC)ccc1	87550708	Ivnitski-Steele_2010	reported by Montanari_2014	INHIBITOR	1
1713	o1cc(cc1)C(=O)N1CCN(CC1)C=1n2nc(cc2N=C(C=1)c1ccccc1)-c1ccc(OC)cc1	87357359	Ivnitski-Steele_2010	reported by Montanari_2014	INHIBITOR	1
1714	o1cc(cc1)C(=O)N1CCN(CC1)C=1n2nc(cc2N=C(C=1)c1ccccc1)-c1ccc(cc1)C	87357355	Njus_2010	reported by Montanari_2014	INHIBITOR	1
1715	o1cc(cc1)C(=O)N1CCN(CC1)C=1n2nc(cc2N=C(C=1)c1ccccc1)-c1ccncc1	90944694	Ivnitski-Steele_2010	reported by Montanari_2014	INHIBITOR	1
1716	o1cc(cc1)C(=O)N1CCN(CC1)C=1n2nc(cc2N=C(C=1)c1ccccc1OC)-c1ccccc1	99361146	Ivnitski-Steele_2010	reported by Montanari_2014	INHIBITOR	1
1717	o1cc(cc1)C(=O)N1CCN(CC1)C=1n2nc(cc2N=C(C=1C)c1ccccc1)-c1cc(OC)ccc1	93619257	Ivnitski-Steele_2010	reported by Montanari_2014	INHIBITOR	1
1718	o1cc(cc1)C1=Nc2n(nc(c2)-c2ccccc2)C(N2CCN(CC2)C(=O)c2ccoc2)=C1	99361159	Ivnitski-Steele_2010	reported by Montanari_2014	INHIBITOR	1
1719	o1cccc1C(=O)N1CCN(CC1)C=1n2nc(C)c(c2N=C(C=1)C)-c1ccccc1	85240371	Njus_2010	reported by Montanari_2014	INHIBITOR	1
1720	o1cccc1C(=O)N1CCN(CC1)C=1n2nc(C)c(c2N=C(C=1)C)-c1ccccc1OC	85240379	Ivnitski-Steele_2010	reported by Montanari_2014	INACTIVE	0
1721	o1cccc1C(=O)N1CCN(CC1)C=1n2nc(cc2N=C(C)C=1C)-c1cc(OC)ccc1	92764889	Ivnitski-Steele_2010	reported by Montanari_2014	INHIBITOR	1
1722	o1cccc1C(=O)N1CCN(CC1)C=1n2nc(nc2N=C(C=1)C)-c1ccc(cc1)C	85240387	Ivnitski-Steele_2010	reported by Montanari_2014	INHIBITOR	1
1723	o1cccc1C(=O)N1CCN(CC1)C=1n2ncc(c2N=C(C=1)C)-c1ccccc1	85240375	Ivnitski-Steele_2010	reported by Montanari_2014	INHIBITOR	1
1724	o1cccc1C(=O)N1CCN(CC1)C=1n2ncnc2N=C(C=1)c1ccccc1	85240385	Ivnitski-Steele_2010	reported by Montanari_2014	INACTIVE	0
1725	o1cccc1C(=O)N1CCN(CC1)c1nc(N)c2cc(OC)c(OC)cc2n1	Prazosin	Matsson_2007	reported by Montanari_2014	INHIBITOR	1
1726	o1cccc1C(=O)Nc1cc(ccc1N1CCOCC1)C(=O)c1ccccc1	4256765	Ivnitski-Steele_2008	reported by Montanari_2014	INACTIVE	0
1727	o1cccc1[C@H]([NH+]1CCOCC1)CNC(=O)C(=O)NCc1cc(OC)ccc1	17514833	Ivnitski-Steele_2008	reported by Montanari_2014	INACTIVE	0
1728	o1cccc1C1=Nc2n(nc(c2)-c2cc(OC)ccc2)C(N2CCN(CC2)C(=O)C)=C1	99376137	Ivnitski-Steele_2010	reported by Montanari_2014	INHIBITOR	1
1729	o1cccc1C1=Nc2n(nc(c2)-c2cc(OC)ccc2)C(N2CCN(CC2)C(=O)c2ccoc2)=C1	92764890	Ivnitski-Steele_2010	reported by Montanari_2014	INHIBITOR	1
1730	o1cccc1C1=Nc2n(nc(c2)-c2cc(ccc2)-c2occc2)C(N2CCN(CC2)C(=O)c2ccoc2)=C1	88095710	Ivnitski-Steele_2010	reported by Montanari_2014	INHIBITOR	1
1731	o1cccc1C1=Nc2n(nc(c2)-c2cc(ccc2)C)C(N2CCN(CC2)C(=O)c2ccoc2)=C1	99361151	Ivnitski-Steele_2010	reported by Montanari_2014	INHIBITOR	1
1732	o1cccc1C1=Nc2n(nc(c2)-c2ccc(OC)cc2)C(N2CCN(CC2)C(=O)c2ccoc2)=C1	93619266	Ivnitski-Steele_2010	reported by Montanari_2014	INHIBITOR	1
1733	o1cccc1C1=Nc2n(nc(c2)-c2ccc(cc2)C)C(N2CCN(CC2)C(=O)c2ccoc2)=C1	99361152	Ivnitski-Steele_2010	reported by Montanari_2014	INHIBITOR	1
1734	o1cccc1C1=Nc2n(nc(c2)-c2ccc(cc2)C)C(N2CC[NH+](CC2)Cc2ccoc2)=C1	99376134	Ivnitski-Steele_2010	reported by Montanari_2014	INHIBITOR	1
1735	o1cccc1C1=Nc2n(nc(c2)-c2ccccc2)C(N(C)C)=C1	93619264	Ivnitski-Steele_2010	reported by Montanari_2014	INHIBITOR	1
1736	o1cccc1C1=Nc2n(nc(c2)-c2ccccc2)C(N(CCCN(C(=O)c2ccoc2)C)C)=C1	96022048	Ivnitski-Steele_2010	reported by Montanari_2014	INHIBITOR	1
1737	o1cccc1C1=Nc2n(nc(c2)-c2ccccc2)C(N(CCC[NH2+]C)C)=C1	93619262	Ivnitski-Steele_2010	reported by Montanari_2014	INHIBITOR	1
1738	o1cccc1C1=Nc2n(nc(c2)-c2ccccc2)C(N(CCN(C(=O)c2ccoc2)C)C)=C1	93619261	Ivnitski-Steele_2010	reported by Montanari_2014	INHIBITOR	1
1739	o1cccc1C1=Nc2n(nc(c2)-c2ccccc2)C(N(CC[NH2+]C)C)=C1	93619259	Ivnitski-Steele_2010	reported by Montanari_2014	INHIBITOR	1
1740	o1cccc1C1=Nc2n(nc(c2)-c2ccccc2)C(N2CC(=O)N(CC2)c2ccccc2)=C1	93619268	Ivnitski-Steele_2010	reported by Montanari_2014	INHIBITOR	1
1741	o1cccc1C1=Nc2n(nc(c2)-c2ccccc2)C(N2CCC(CC2)C(=O)Nc2ccccc2)=C1	96022049	Ivnitski-Steele_2010	reported by Montanari_2014	INACTIVE	0
1742	o1cccc1C1=Nc2n(nc(c2)-c2ccccc2)C(N2CCCN(C2)C(=O)c2ccoc2)=C1	96022051	Ivnitski-Steele_2010	reported by Montanari_2014	INHIBITOR	1
1743	o1cccc1C1=Nc2n(nc(c2)-c2ccccc2)C(N2CCN(CC2)C(=O)C)=C1	96022055	Ivnitski-Steele_2010	reported by Montanari_2014	INHIBITOR	1
1744	o1cccc1C1=Nc2n(nc(c2)-c2ccccc2)C(N2CCN(CC2)C(=O)c2c(coc2C)C)=C1	96022052	Ivnitski-Steele_2010	reported by Montanari_2014	INHIBITOR	1
1745	o1cccc1C1=Nc2n(nc(c2)-c2ccccc2)C(N2CCN(CC2)C(=O)c2c3c(oc2)cccc3)=C1	96022054	Ivnitski-Steele_2010	reported by Montanari_2014	INHIBITOR	1
1746	o1cccc1C1=Nc2n(nc(c2)-c2ccccc2)C(N2CCN(CC2)C(=O)c2ccccc2)=C1	96022057	Ivnitski-Steele_2010	reported by Montanari_2014	INHIBITOR	1
1747	o1cccc1C1=Nc2n(nc(c2)-c2ccccc2)C(N2CCN(CC2)C(=O)c2ccoc2)=C1	88095709	Ivnitski-Steele_2010	reported by Montanari_2014	INHIBITOR	1
1748	o1cccc1C1=Nc2n(nc(c2)-c2ccccc2)C(N2CCN(CC2)C(=O)c2ccoc2)=C1C	97301790	Ivnitski-Steele_2010	reported by Montanari_2014	INHIBITOR	1
1749	o1cccc1C1=Nc2n(nc(c2)-c2ccccc2)C(N2CCN(CC2)C(=O)c2ccoc2C)=C1	96022050	Ivnitski-Steele_2010	reported by Montanari_2014	INHIBITOR	1
1750	o1cccc1C1=Nc2n(nc(c2)-c2ccccc2)C(N2CCN(CC2)C(=O)c2occc2)=C1	96022056	Ivnitski-Steele_2010	reported by Montanari_2014	INHIBITOR	1
1751	o1cccc1C1=Nc2n(nc(c2)-c2ccccc2)C(N2CCN(CC2)C(OC(C)(C)C)=O)=C1	93619260	Ivnitski-Steele_2010	reported by Montanari_2014	INHIBITOR	1
1752	o1cccc1C1=Nc2n(nc(c2)-c2ccccc2)C(N2CCN(CC2)C(OCc2ccccc2)=O)=C1	93619263	Ivnitski-Steele_2010	reported by Montanari_2014	INHIBITOR	1
1753	o1cccc1C1=Nc2n(nc(c2)-c2ccccc2)C(N2CC[NH+](CC2)Cc2ccccc2)=C1	93619269	Ivnitski-Steele_2010	reported by Montanari_2014	INHIBITOR	1
1754	o1cccc1C1=Nc2n(nc(c2)-c2ccccc2)C(N2CCN(C[C@H]2C)C(=O)c2ccoc2)=C1	97301786	Ivnitski-Steele_2010	reported by Montanari_2014	INHIBITOR	1
1755	o1cccc1C1=Nc2n(nc(c2)-c2ccccc2)C(N2CCN(C[C@H]2C)C(OC(C)(C)C)=O)=C1	96022047	Ivnitski-Steele_2010	reported by Montanari_2014	INHIBITOR	1
1756	o1cccc1C1=Nc2n(nc(c2)-c2ccccc2)C(N2CC[NH2+]CC2)=C1	93619270	Ivnitski-Steele_2010	reported by Montanari_2014	INHIBITOR	1
1757	o1cccc1C1=Nc2n(nc(c2)-c2ccccc2OC)C(N2CCN(CC2)C(=O)c2ccoc2)=C1	99361150	Ivnitski-Steele_2010	reported by Montanari_2014	INHIBITOR	1
1758	o1cccc1C1=Nc2n(nc(c2)-c2occc2)C(N2CCN(CC2)C(=O)c2ccoc2)=C1	99361155	Ivnitski-Steele_2010	reported by Montanari_2014	INHIBITOR	1
1759	o1cccc1C1=Nc2n(nc(c2)C(C)(C)C)C(N2CCN(CC2)C(=O)c2ccoc2)=C1	99376135	Ivnitski-Steele_2010	reported by Montanari_2014	INHIBITOR	1
1760	o1cccc1C[NH+]1CCN(CC1)C=1n2nc(cc2N=C(C)C=1C)-c1cc(OC)ccc1	97301789	Ivnitski-Steele_2010	reported by Montanari_2014	INHIBITOR	1
1761	o1nc(nc1CCC(=O)NCCCN(CC)c1cc(ccc1)C)-c1ccc(cc1)C	4240557	Ivnitski-Steele_2008	reported by Montanari_2014	INACTIVE	0
1762	o1nc(nc1COC)-c1ccc(nc1OCC)-c1ccccc1	852789	Ivnitski-Steele_2008	reported by Montanari_2014	INACTIVE	0
1763	o1nc(nc1COc1ccccc1)-c1ccncc1	24806339	Ivnitski-Steele_2008	reported by Montanari_2014	INACTIVE	0
1764	o1nc2c(n1)cccc2[C@H]1C(C(OC(C)C)=O)=C(NC(C)=C1C(OC)=O)C	Isradipine	Matsson_2007	reported by Montanari_2014	INHIBITOR	1
1765	o1nc2nc(N3CCCC[C@H]3C)c(nc2n1)Nc1ccccc1OC	17509535	Ivnitski-Steele_2008	reported by Montanari_2014	INACTIVE	0
1766	s1c(C(OCC)=O)c(C)c(C(OCC)=O)c1NC(=O)CSc1oc(nn1)-c1occc1	4259701	Ivnitski-Steele_2008	reported by Montanari_2014	INACTIVE	0
1767	s1c(C(OCC)=O)c(C)c(C(OCC)=O)c1N\N=C(\C(OC)=O)/C(OC)=O	22407014	Ivnitski-Steele_2008	reported by Montanari_2014	INACTIVE	0
1768	s1c(C(OCC)=O)c(cc1Nc1sc2c(n1)cc1OCOc1c2)C	17514817	Ivnitski-Steele_2008	reported by Montanari_2014	INACTIVE	0
1769	s1c(nnc1NC(=O)c1cc(S(=O)(=O)N2CCOCC2)ccc1N1CCCCC1)CC	24837996	Ivnitski-Steele_2008	reported by Montanari_2014	INACTIVE	0
1770	s1c2CCCCc2nc1C1=Cc2c(OC1=O)cccc2	17407808	Ivnitski-Steele_2008	reported by Montanari_2014	INACTIVE	0
1771	s1c2c(CCCC2)c(C(OCC)=O)c1NC(=O)COCC	4258258	Ivnitski-Steele_2008	reported by Montanari_2014	INACTIVE	0
1772	s1c2c(CC[N@H+](C2)Cc2ccccc2)c(C(OCC)=O)c1NC(=O)CSc1ncccn1	17505942	Ivnitski-Steele_2008	reported by Montanari_2014	INACTIVE	0
1773	s1c2c([C@@H](CCC2)C)c(C(=O)[O-])c1NC(=S)N(CC)CC	103689140	Hacker_2009	reported by Montanari_2014	INHIBITOR	1
1774	s1c2c(c(N)c1C(OC)=O)c(SCC(C)C)cc([N+](=O)[O-])c2	17510584	Ivnitski-Steele_2008	reported by Montanari_2014	INACTIVE	0
1775	s1c2c(c(N)c1C(OCC)=O)c(SCC(C)C)cc([N+](=O)[O-])c2	17386314	Ivnitski-Steele_2008	reported by Montanari_2014	INACTIVE	0
1776	s1c2c(c(N)c1C(OCC)=O)c(SCCO)cc([N+](=O)[O-])c2	17509358	Ivnitski-Steele_2008	reported by Montanari_2014	INACTIVE	0
1777	s1c2c(cccc2)c(C(=O)[O-])c1NC(=S)N(CC)CC	103685616	Hacker_2009	reported by Montanari_2014	INHIBITOR	1
1778	s1c2c(nc(nc2O)CS\C(=N\C)\NC)cc1	3711455	Ivnitski-Steele_2008	reported by Montanari_2014	INACTIVE	0
1779	s1c2c(nc1-n1nc(cc1NC(=O)C(C)C)C)cccc2	24841258	Ivnitski-Steele_2008	reported by Montanari_2014	INACTIVE	0
1780	s1c2c(nc1/C(=C/N1CCN(CC1)C(OCC)=O)/C#N)cccc2	861161	Ivnitski-Steele_2008	reported by Montanari_2014	INACTIVE	0
1781	s1c2c(nc1NC(=O)C=1[C@H](C=3C(=NC=1C)CC(CC=3O)(C)C)c1cccc(OC)c1OC)cccc2	17387740	Ivnitski-Steele_2008	reported by Montanari_2014	INACTIVE	0
1782	s1c2cc([N+](=O)[O-])ccc2nc1NC(=O)c1c(F)cccc1F	24788504	Ivnitski-Steele_2008	reported by Montanari_2014	INACTIVE	0
1783	s1c2cc(n(c2cc1)C)C(=O)NCc1ccccc1OC	851389	Ivnitski-Steele_2008	reported by Montanari_2014	INACTIVE	0
1784	s1c2ncnc(NC[C@@H]3Oc4c(OC3)cccc4)c2c(C)c1C	22406771	Ivnitski-Steele_2008	reported by Montanari_2014	INACTIVE	0
1785	s1cc(-c2ccc(cc2)C)c(C(OCC)=O)c1NC(=O)\C(=C\c1cc(OC)c(O)cc1)\C#N	17512989	Ivnitski-Steele_2008	reported by Montanari_2014	INACTIVE	0
1786	s1cc(-c2ccccc2)c(C(OCC)=O)c1NC(=O)\C(=C\c1cc(OC)c(O)cc1)\C#N	22406563	Ivnitski-Steele_2008	reported by Montanari_2014	INACTIVE	0
1787	s1cc(c2c1N=C(SCC(=O)N(C)C)N(Cc1ccccc1)C2=O)-c1ccc(cc1)C	17433249	Ivnitski-Steele_2008	reported by Montanari_2014	INACTIVE	0
1788	s1cc(cc1)C(=O)N1CCN(CC1)C=1n2nc(cc2N=C(C=1)c1ccccc1)-c1ccc(OC)cc1	87357361	Njus_2010	reported by Montanari_2014	INHIBITOR	1
1789	s1cc(cc1)C(=O)N1CCN(CC1)C=1n2nc(cc2N=C(C=1)c1occc1)-c1ccccc1	96022058	Ivnitski-Steele_2010	reported by Montanari_2014	INHIBITOR	1
1790	s1cc(cc1)CC(OCC(=O)N[C@H](C)[C@H]1[C@@H]2CC[C@H](C1)C2)=O	16953419	Ivnitski-Steele_2008	reported by Montanari_2014	INACTIVE	0
1791	s1cc(nc1-c1ccccc1)CSc1nc2c(n1CCOC)cccc2	3712057	Ivnitski-Steele_2008	reported by Montanari_2014	INACTIVE	0
1792	s1cc(nc1C[NH+](C)C)CSCCN\C(\NC)=C\[N+](=O)[O-]	Nizatidine	Matsson_2007	reported by Montanari_2014	INACTIVE	0
1793	s1cc(nc1NC(=O)Nc1ccccc1)-c1ccc(F)cc1	22415826	Ivnitski-Steele_2008	reported by Montanari_2014	INACTIVE	0
1794	s1cc(nc1NC(=O)[C@@H](NC(=O)c1cc(OC)cc(OC)c1)C(C)C)-c1cc(OC)ccc1OC	24825332	Ivnitski-Steele_2008	reported by Montanari_2014	INACTIVE	0
1795	s1ccc(C(=O)[O-])c1NC(=S)N(C)C1CCCCC1	103692669	Hacker_2009	reported by Montanari_2014	INHIBITOR	1
1796	s1ccc(NCc2cc(N)ccc2)c1C(=O)Nc1ccc(OC(F)(F)F)cc1	12	Patel_2011	reported by Montanari_2014	INACTIVE	0
1797	s1ccc(NCc2cc(N=C=S)ccc2)c1C(=O)Nc1ccc(OC(F)(F)F)cc1	18	Patel_2011	reported by Montanari_2014	INACTIVE	0
1798	s1ccc(NCc2cc([N+](=O)[O-])ccc2)c1C(=O)Nc1ccc(OC(F)(F)F)cc1	8	Patel_2011	reported by Montanari_2014	INACTIVE	0
1799	s1ccc(NCc2ccc(N)cc2)c1C(=O)Nc1ccc(OC(F)(F)F)cc1	13	Patel_2011	reported by Montanari_2014	INACTIVE	0
1800	s1ccc(NCc2ccc(N=C=S)cc2)c1C(=O)Nc1ccc(OC(F)(F)F)cc1	19	Patel_2011	reported by Montanari_2014	INACTIVE	0
1801	s1ccc(NCc2ccc(NC(=O)C)cc2)c1C(=O)Nc1ccc(OC(F)(F)F)cc1	16	Patel_2011	reported by Montanari_2014	INACTIVE	0
1802	s1ccc(NCc2ccc([N+](=O)[O-])cc2)c1C(=O)Nc1ccc(OC(F)(F)F)cc1	9	Patel_2011	reported by Montanari_2014	INACTIVE	0
1803	s1ccc(NCc2ccccc2N)c1C(=O)Nc1ccc(OC(F)(F)F)cc1	11	Patel_2011	reported by Montanari_2014	INACTIVE	0
1804	s1ccc(NCc2ccccc2N=C=S)c1C(=O)Nc1ccc(OC(F)(F)F)cc1	17	Patel_2011	reported by Montanari_2014	INACTIVE	0
1805	s1ccc(NCc2ccccc2NC(=O)C)c1C(=O)Nc1ccc(OC(F)(F)F)cc1	14	Patel_2011	reported by Montanari_2014	INACTIVE	0
1806	s1ccc(NCc2ccccc2[N+](=O)[O-])c1C(=O)Nc1ccc(OC(F)(F)F)cc1	7	Patel_2011	reported by Montanari_2014	INHIBITOR	1
1807	s1ccc(NCc2ccncc2N)c1C(=O)Nc1ccc(OC(F)(F)F)cc1	6	Patel_2011	reported by Montanari_2014	INACTIVE	0
1808	s1ccc(NCc2ccncc2[N+](=O)[O-])c1C(=O)Nc1ccc(OC(F)(F)F)cc1	5	Patel_2011	reported by Montanari_2014	INHIBITOR	1
1809	s1cccc1-c1nc2sc(C(=O)C3CC3)c(N)c2c(c1)C(F)(F)F	14740141	Ivnitski-Steele_2008	reported by Montanari_2014	INACTIVE	0
1810	s1cccc1-c1nn2c(N=C(C=C2N2CCN(CC2)C(=O)c2ccoc2)c2occc2)c1	99361154	Ivnitski-Steele_2010	reported by Montanari_2014	INHIBITOR	1
1811	s1cccc1C(=O)Nc1cc(N(C)C)ccc1P(=O)(Nc1cc(ccc1)C(F)(F)F)N1CCOCC1	22403396	Ivnitski-Steele_2008	reported by Montanari_2014	INACTIVE	0
1812	s1cccc1C(=O)Nc1cc(NC(=O)\C=C\c2cc([N+](=O)[O-])ccc2)ccc1	17505714	Ivnitski-Steele_2008	reported by Montanari_2014	INACTIVE	0
1813	s1cccc1C(=O)Nc1cc(OC)c(OC)cc1C(OCC(=O)c1cc(n(c1C)-c1ccc(OC)cc1)C)=O	22407590	Ivnitski-Steele_2008	reported by Montanari_2014	INACTIVE	0
1814	s1cccc1C(=O)n1nc(nc1NCc1ccc(OC)cc1)-c1cccnc1	4254626	Ivnitski-Steele_2008	reported by Montanari_2014	INACTIVE	0
1815	s1cccc1C1=Nc2n(nc(c2)-c2ccccc2)C(N2CCN(CC2)C(=O)c2ccoc2)=C1	99361156	Ivnitski-Steele_2010	reported by Montanari_2014	INHIBITOR	1
1816	s1cccc1[C@H]1N(O[C@H]2[C@@H]1C(=O)N(c1ccc(OCC)cc1)C2=O)c1ccccc1	24783885	Ivnitski-Steele_2008	reported by Montanari_2014	INACTIVE	0
1817	s1cccc1CC(=O)N([C@H](C(=O)NC1CCCCC1)c1ccc(cc1)C(OC)=O)Cc1ccccc1	17509066	Ivnitski-Steele_2008	reported by Montanari_2014	INACTIVE	0
1818	s1cccc1C[N@@H+]([C@H](C(C)C)c1nnnn1C1CCCC1)Cc1cc2c(nc1O)c(ccc2)C	846572	Ivnitski-Steele_2008	reported by Montanari_2014	INACTIVE	0
1819	s1ccnc1N1C(=O)/C(/c2c(cccc2)C1=O)=C/Nc1ccc(cc1)C	22407267	Ivnitski-Steele_2008	reported by Montanari_2014	INACTIVE	0
1820	s1ccnc1NC(=O)CS(=O)(=O)c1c2c(n(c1)Cc1ccccc1C)cccc2	4252218	Ivnitski-Steele_2008	reported by Montanari_2014	INACTIVE	0
1821	s1cncc1COC(=O)N[C@H]([C@@H](O)C[C@@H](NC(=O)[C@@H](NC(=O)N(Cc1nc(sc1)C(C)C)C)C(C)C)Cc1ccccc1)Cc1ccccc1	Ritonavir	Matsson_2007	reported by Montanari_2014	INHIBITOR	1
1822	s1nc(N2CCOCC2)c(OC[C@@H](O)C[NH2+]C(C)(C)C)n1	Timolol	Matsson_2007	reported by Montanari_2014	INACTIVE	0
1823	s1cccc1S(=O)(=O)Nc1ccc(S(=O)(=O)N2CCCCCC2)cc1	1021996	pubchem(AID=1325)	%inhibition at 6.6 uM	-38.11	0
1824	s1c(nnc1SCC(=O)c1oc(nn1)-c1ccccc1)Nc1ccc(cc1)C(C)C	2375556	pubchem(AID=1325)	%inhibition at 6.6 uM	-33.05	0
1825	S=C1NC(=O)/C(=C\C=C\c2occc2)/C(=O)N1CCCC	1595371	pubchem(AID=1325)	%inhibition at 6.6 uM	-33.03	0
1826	SC=1NC(C2=C(N=1)/C(/CCC2)=C/c1ccc(cc1)C)c1ccc(cc1)C	5738904	pubchem(AID=1325)	%inhibition at 6.6 uM	-32.29	0
1827	Clc1cc(ncc1)NS(=O)(=O)c1ccc(Cl)cc1	898366	pubchem(AID=1325)	%inhibition at 6.6 uM	-31.59	0
1828	s1cc(nc1N1N=C(CC1=O)C)-c1ccccc1	834376	pubchem(AID=1325)	%inhibition at 6.6 uM	-29.45	0
1829	S(=O)(=O)(Nc1nc2c(nc1NCc1occc1)cccc2)c1cc(C)c(cc1)C	664753	pubchem(AID=1325)	%inhibition at 6.6 uM	-27.95	0
1830	s1ccnc1N1C(=O)/C(/c2c(cccc2)C1=O)=C\Nc1ccccc1C	5672271	pubchem(AID=1325)	%inhibition at 6.6 uM	-27.45	0
1831	Clc1ccc(cc1)-c1nc(sc1N=Nc1ccc(S(=O)(=O)N2CCOCC2)cc1)N	6892643	pubchem(AID=1325)	%inhibition at 6.6 uM	-27.24	0
1832	S1\C(=C/C=C/2\SCCN\2C)\C(=O)N(C)C1=S	1734120	pubchem(AID=1325)	%inhibition at 6.6 uM	-27.23	0
1833	Clc1c2c(sc1C(=O)N[N-]C(=S)NC(=O)c1ccccc1OC)cccc2	2215626	pubchem(AID=1325)	%inhibition at 6.6 uM	-27.15	0
1834	s1cccc1S(=O)(=O)Nc1ccccc1C(OC(C(=O)Nc1cc(ccc1)C(=O)C)c1ccccc1)=O	3540946	pubchem(AID=1325)	%inhibition at 6.6 uM	-27.02	0
1835	Brc1cc(ccc1OC)C(=O)NC(=S)N(CC)CC	833421	pubchem(AID=1325)	%inhibition at 6.6 uM	-26.93	0
1836	S1c2cc(N(S(=O)(=O)c3ccc(OC)cc3)C(=O)C)ccc2OC1=O	655888	pubchem(AID=1325)	%inhibition at 6.6 uM	-26.52	0
1837	O(C)c1cc(ccc1OC)\C=C\C(=O)Nc1ccc(cc1)C12CC3(O)CC(C1)CC(C2)C3	5786057	pubchem(AID=1325)	%inhibition at 6.6 uM	-26.04	0
1838	O=C(Nc1ccc(NC(=O)C)cc1)c1ccc(-n2c(ccc2C)C)cc1	2542331	pubchem(AID=1325)	%inhibition at 6.6 uM	-25.83	0
1839	O1c2[nH]nc(c2C(C(C#N)=C1N)c1c2c(ncc1)cccc2)COC	660958	pubchem(AID=1325)	%inhibition at 6.6 uM	-25.43	0
1840	Brc1ccc(N2CC(CC2=O)C(=O)NCC=C)cc1	3116857	pubchem(AID=1325)	%inhibition at 6.6 uM	-24.92	0
1841	Brc1ccc(cc1)C(ON1C(=Nc2c(cccc2)C1=O)c1cc(OC)cc(OC)c1)=O	12004873	pubchem(AID=1325)	%inhibition at 6.6 uM	-24.91	0
1842	Sc1nnc(n1CC)-c1cc(nc2c1cccc2)-c1cc(ccc1C)C	999143	pubchem(AID=1325)	%inhibition at 6.6 uM	-24.9	0
1843	O(C)c1cc(cc(OC)c1)C1=Nc2c(cccc2)C(=O)N1OC(=O)c1ccccc1C	12004894	pubchem(AID=1325)	%inhibition at 6.6 uM	-24.71	0
1844	S(=O)(=O)(Nc1c2c(c3oc(C)c(c3c1)C(=O)Nc1ccccc1)cccc2)c1ccc(cc1)C	2337760	pubchem(AID=1325)	%inhibition at 6.6 uM	-24.56	0
1845	Clc1sc(nc1S(=O)(=O)c1ccc(cc1)C)Nc1sccn1	2136921	pubchem(AID=1325)	%inhibition at 6.6 uM	-24.42	0
1846	s1ccnc1NS(=O)(=O)c1ccc(NC(=O)CSc2cc3c(cc2)cccc3)cc1	2434752	pubchem(AID=1325)	%inhibition at 6.6 uM	-24.36	0
1847	S=C1NC(=O)/C(=C\c2cc(n(c2C)-c2nccc(c2)C)C)/C(=O)N1C	5829874	pubchem(AID=1325)	%inhibition at 6.6 uM	-24.32	0
1848	Fc1ccc(cc1)C(=O)c1n2c(C=CC=C2)c(\C=N\NC(=O)c2ccc(O)cc2)c1C	6906237	pubchem(AID=1325)	%inhibition at 6.6 uM	-23.96	0
1849	S(=O)(=O)(Nc1nc2c(nc1NCc1occc1)cccc2)c1ccccc1	662383	pubchem(AID=1325)	%inhibition at 6.6 uM	-23.74	0
1850	O(C)c1ccc(cc1)C(=O)N\N=C(/C)\c1cc2C3C(CC=C3)C(Nc2cc1)c1ccccc1	9594287	pubchem(AID=1325)	%inhibition at 6.6 uM	-23.66	0
1851	S1\C(=C/c2cc(OC)ccc2OC)\C(=O)N=C1NNC(=O)c1cc2c(cc1)cccc2	5762894	pubchem(AID=1325)	%inhibition at 6.6 uM	-23.57	0
1852	ClC=1C(=O)N(N=CC=1Cl)CC(=O)Nc1cc(S(=O)(=O)N2CCOCC2)c(OC)cc1	4964969	pubchem(AID=1325)	%inhibition at 6.6 uM	-23.49	0
1853	Clc1ccc(Cl)cc1S(=O)(=O)Nc1sccn1	661093	pubchem(AID=1325)	%inhibition at 6.6 uM	-23.44	0
1854	Clc1cc(ccc1)-c1oc(cc1)\C=C\1/C(N2C(SC=C2c2ccccc2)=NC/1=O)=N	1984877	pubchem(AID=1325)	%inhibition at 6.6 uM	-23.44	0
1855	O(C)c1c2NC(C3C(C=CC3)c2ccc1)C(=O)[O-]	652912	pubchem(AID=1325)	%inhibition at 6.6 uM	-23.42	0
1856	Clc1ccc(cc1)-c1sc(nc1)-n1nc(C)c(C(C(C#N)C#N)c2ccc(Cl)cc2)c1O	3117079	pubchem(AID=1325)	%inhibition at 6.6 uM	-23.39	0
1857	o1c(ccc1\C=C(/C#N)\c1[nH]nc(N)c1C#N)-c1cc([N+](=O)[O-])ccc1C	5337472	pubchem(AID=1325)	%inhibition at 6.6 uM	-23.35	0
1858	S(=O)(=O)(N(C)C)c1cc(NC(=O)c2nccnc2)ccc1C	4879758	pubchem(AID=1325)	%inhibition at 6.6 uM	-23.21	0
1859	O=C(Nc1ccc(cc1C)C)CCC(=O)NNC(=O)\C=C\C(=O)[O-]	5766238	pubchem(AID=1325)	%inhibition at 6.6 uM	-23.15	0
1860	Clc1cc(NC(=S)N=Nc2c3c(n(CC=C)c2O)cccc3)ccc1OC	6018530	pubchem(AID=1325)	%inhibition at 6.6 uM	-23.12	0
1861	ClC(Cl)(Cl)C(NC(=O)c1ccc(cc1)C)NC(=S)Nc1ccc(S(=O)(=O)N)cc1	2829916	pubchem(AID=1325)	%inhibition at 6.6 uM	-23.1	0
1862	O1C(=O)/C(/C=C1CC(C)C)=C\c1oc(cc1)-c1ccccc1	1918570	pubchem(AID=1325)	%inhibition at 6.6 uM	-23.06	0
1863	s1cccc1C1NC(=O)NC(C)=C1C(=O)N1CCOCC1	2886417	pubchem(AID=1325)	%inhibition at 6.6 uM	-22.79	0
1864	o1cccc1CN1C(=O)\C(=C/c2ccc(N(CC)CC)cc2)\C(=O)NC1=O	1515550	pubchem(AID=1325)	%inhibition at 6.6 uM	-22.76	0
1865	Brc1cc(sc1)C(=O)N[N-]C(=S)NCC	4201165	pubchem(AID=1325)	%inhibition at 6.6 uM	-22.68	0
1866	S1C(C(=O)NNS(=O)(=O)c2ccc(NC(=O)C)cc2)=C(N(C)C1=S)C	1869874	pubchem(AID=1325)	%inhibition at 6.6 uM	-22.52	0
1867	S1c2c(nc(SCC(=O)CC(OCC)=O)nc2O)N(c2ccc(OCC)cc2)C1=S	4415189	pubchem(AID=1325)	%inhibition at 6.6 uM	-22.47	0
1868	Clc1cc(ccc1Cl)COC(=O)CSc1sc(nn1)N	2474182	pubchem(AID=1325)	%inhibition at 6.6 uM	-22.47	0
1869	O=C1N(N=Nc2c1cccc2)COC(=O)c1cc(nc2c1cccc2)-c1ccc(cc1)C	2488539	pubchem(AID=1325)	%inhibition at 6.6 uM	-22.47	0
1870	s1c(nnc1SC/C(/O)=C(\C#N)/c1[nH]c2c(n1)cccc2)Nc1c(cccc1C)C	5682988	pubchem(AID=1325)	%inhibition at 6.6 uM	-22.35	0
1871	S(CC(=O)N1CCOCC1)c1nnc(n1Cc1occc1)CNc1ccc(F)cc1	1154963	pubchem(AID=1325)	%inhibition at 6.6 uM	-22.11	0
1872	S(=O)(=O)(N1CCC(CC1)Cc1ccccc1)c1cc2oc(O)nc2cc1	2002582	pubchem(AID=1325)	%inhibition at 6.6 uM	-21.89	0
1873	S(=O)(=O)(Nc1ccccc1OC)c1cc(ccc1)C(=O)N\N=C\c1ccc(N(CC)CC)cc1O	6068891	pubchem(AID=1325)	%inhibition at 6.6 uM	-21.76	0
1874	S(=O)(=O)(N(C)c1ccc(OCC(OCC(=O)Nc2ccccc2)=O)cc1)c1ccc(F)cc1	2389269	pubchem(AID=1325)	%inhibition at 6.6 uM	-21.7	0
1875	s1c(nnc1C)CC(=O)c1ccc(OC)cc1	851795	pubchem(AID=1325)	%inhibition at 6.6 uM	-21.7	0
1876	O(c1ccc(cc1)\C=C(\C#N)/c1[nH]c2c(n1)cc(cc2)C)c1ncc([N+](=O)[O-])cc1	5740464	pubchem(AID=1325)	%inhibition at 6.6 uM	-21.62	0
1877	ClC1=CC(P(OCC)(OCC)=O)(NS(=O)(=O)c2ccccc2)c2c(cccc2)C1=O	4304519	pubchem(AID=1325)	%inhibition at 6.6 uM	-21.6	0
1878	Brc1oc(cc1)C(=O)Nc1n(c2nc3c(nc2c1C(=O)NCCOC)cccc3)Cc1ccccc1	1925701	pubchem(AID=1325)	%inhibition at 6.6 uM	-21.56	0
1879	Clc1ccccc1NS(=O)(=O)c1cc(NC(=O)\C=C\c2sccc2)ccc1N1CCOCC1	6110967	pubchem(AID=1325)	%inhibition at 6.6 uM	-21.54	0
1880	S(=O)(=O)(Nc1ccc(cc1)C(=O)Nc1ccc(NC(=O)C)cc1)c1cc(cc(C)c1C)C(C)(C)C	1299033	pubchem(AID=1325)	%inhibition at 6.6 uM	-21.49	0
1881	S\1c2cc(S(=O)(=O)N)ccc2N(CCOC)/C/1=N/C(=O)c1ccc(S(=O)(=O)N2CCc3c(C2)cccc3)cc1	4192997	pubchem(AID=1325)	%inhibition at 6.6 uM	-21.34	0
1882	Clc1c(N(S(=O)(=O)C)Cc2ccc(cc2)C(=O)N\N=C\c2cc3c(nc2Cl)cc(OC)cc3)cccc1Cl	9593926	pubchem(AID=1325)	%inhibition at 6.6 uM	-21.31	0
1883	Brc1ccccc1\C=N\Nc1nc2c(cc1)cccc2	9656065	pubchem(AID=1325)	%inhibition at 6.6 uM	-21.29	0
1884	S(=O)(=O)(N)c1ccc(N\C=C/C(=O)c2cc3c(cc2)cccc3)cc1	5345509	pubchem(AID=1325)	%inhibition at 6.6 uM	-21.2	0
1885	Brc1sc(S(=O)(=O)Nc2ccc(S(=O)(=O)N3CCCCC3)cc2)cc1	1006732	pubchem(AID=1325)	%inhibition at 6.6 uM	-21.04	0
1886	OC1=C2C(=Nc3nn(-c4ccccc4)c(O)c3C2c2ccc(cc2)C)c2c1cccc2	4255991	pubchem(AID=1325)	%inhibition at 6.6 uM	-20.95	0
1887	Sc1nnc(n1\N=C\C=C\c1ccccc1)-c1cccnc1	6887052	pubchem(AID=1325)	%inhibition at 6.6 uM	-20.93	0
1888	O(C)c1cc(cc(OC)c1)C1=Nc2c(cccc2)C(=O)N1OC(=O)c1cc(C)c(cc1)C	12004875	pubchem(AID=1325)	%inhibition at 6.6 uM	-20.91	0
1889	S(CC1=CC(Oc2c1cc(O)c(O)c2)=O)C1=Nc2c(cccc2)C(=O)N1c1cc(OC)ccc1	5691857	pubchem(AID=1325)	%inhibition at 6.6 uM	-20.89	0
1890	s1cccc1C=1OC(=O)/C(/N=1)=C/c1cc(OC)c(OCC)cc1	920409	pubchem(AID=1325)	%inhibition at 6.6 uM	-20.87	0
1891	s1cc(nc1NC(=O)c1cc(OC)c(OCC(=O)N2CCOCC2)cc1)-c1ccc(cc1)C	5191473	pubchem(AID=1325)	%inhibition at 6.6 uM	-20.81	0
1892	S(=O)(=O)(N(CC)CC)c1cc(ccc1)-c1nnc(S)n1\N=C\c1ccc(cc1)C(OC)=O	6903659	pubchem(AID=1325)	%inhibition at 6.6 uM	-20.79	0
1893	Clc1ccc(cc1)-c1c(C(OCC)=O)c(sc1\C=N\Nc1ccccc1)\N=C\N(C)C	9671960	pubchem(AID=1325)	%inhibition at 6.6 uM	-20.77	0
1894	S(CC(=O)c1ccccc1)C=1NC(N)=C(C#N)C2(CCCC2)C=1C#N	1948481	pubchem(AID=1325)	%inhibition at 6.6 uM	-20.68	0
1895	Brc1ccc(N2C(=O)\C(=C\c3c4c([nH]c3C(OC)=O)cccc4)\C(=O)NC2=O)cc1	5512437	pubchem(AID=1325)	%inhibition at 6.6 uM	-20.66	0
1896	ClC1=C(C(=C2N(c3c(N2C)cccc3)C1=O)C#N)c1ccccc1	825094	pubchem(AID=1325)	%inhibition at 6.6 uM	-20.65	0
1897	Sc1nnc(n1\N=C\c1c(n(nc1C)-c1ccccc1)C)-c1ccc(cc1)C	6893958	pubchem(AID=1325)	%inhibition at 6.6 uM	-20.42	0
1898	o1cccc1C(Oc1ccc(cc1OC)\C=C\1/C(=O)N(NC/1=O)c1ccc(cc1)C(OCC)=O)=O	2186345	pubchem(AID=1325)	%inhibition at 6.6 uM	-20.4	0
1899	S(\C(=N\N=C(\C=C\c1ccc(N(C)C)cc1)/C)\N)C1CC(=O)N(C1=O)c1ccc(cc1)C(=O)[O-]	9566914	pubchem(AID=1325)	%inhibition at 6.6 uM	-20.2	0
1900	Sc1nnc(n1N)Cc1c2c(ccc1)cccc2	713091	pubchem(AID=1325)	%inhibition at 6.6 uM	-20.03	0
1901	O1C2=CC(=O)C(O)=CC2=C(c2cc(O)c(O)cc12)c1cc(OC)ccc1OC	2930652	pubchem(AID=1325)	%inhibition at 6.6 uM	-19.88	0
1902	S1CC(=Nn2c1nnc2-c1occc1)c1cc(O)c(O)cc1	5929242	pubchem(AID=1325)	%inhibition at 6.6 uM	-19.87	0
1903	S1\C(=C/c2occc2)\C(=O)N=C1NS(=O)(=O)c1ccc(OC)cc1	1912789	pubchem(AID=1325)	%inhibition at 6.6 uM	-19.72	0
1904	s1c2cc(ccc2nc1NC(=O)c1ccc(S(=O)(=O)N2CCCc3c2cccc3)cc1)C	2147588	pubchem(AID=1325)	%inhibition at 6.6 uM	-19.72	0
1905	s1c2cc(NC(=O)CSc3nnc(n3C)COc3ccccc3C)ccc2nc1SCC(=O)Nc1ccccc1	3921069	pubchem(AID=1325)	%inhibition at 6.6 uM	-19.69	0
1906	s1c2cc(ccc2nc1NC(=O)CSc1snc(SC)n1)C	1862100	pubchem(AID=1325)	%inhibition at 6.6 uM	-19.68	0
1907	Brc1cn(nc1)Cc1oc(cc1)C(=O)N\N=C(/C)\c1cc(NC(=O)C(C)C)ccc1	9617645	pubchem(AID=1325)	%inhibition at 6.6 uM	-19.68	0
1908	S\C(=N/C=1C(=O)N(N(C)C=1C)c1ccccc1)\N\N=C\C=C\c1ccc([N+](=O)[O-])cc1	1641764	pubchem(AID=1325)	%inhibition at 6.6 uM	-19.63	0
1909	S(=O)(=O)(N1CCOCC1)c1cc(NC(=O)\C=C\c2cc3OCOc3cc2)ccc1C	6054974	pubchem(AID=1325)	%inhibition at 6.6 uM	-19.61	0
1910	s1cccc1C=1N(\N=C\c2ccc(O)c(O)c2O)/C(/SC=1)=N/C(C)C	5882673	pubchem(AID=1325)	%inhibition at 6.6 uM	-19.5	0
1911	s1cccc1C(=O)Nc1ccc(NC(=S)NC(=O)c2oc3c(c2)cccc3)cc1	1342894	pubchem(AID=1325)	%inhibition at 6.6 uM	-19.49	0
1912	S(CC(=O)N(C(C(=O)NC(C)(C)C)c1ccc(OC)cc1)c1ccccc1)c1nnc(n1C)-c1ccccc1	3181958	pubchem(AID=1325)	%inhibition at 6.6 uM	-19.48	0
1913	O1c2c(C3N(N=C(C3)c3ccccc3)C13c1c(N(C)C3=O)cccc1)cccc2	5143589	pubchem(AID=1325)	%inhibition at 6.6 uM	-19.45	0
1914	Clc1c2c(sc1C(=O)NC(=S)[N-]NC(=O)c1ccccc1OC)cccc2	1653133	pubchem(AID=1325)	%inhibition at 6.6 uM	-19.42	0
1915	S(=O)(=O)(N1CCOCC1)c1cc2c(n(C)c(O)c2N=NC(=S)Nc2ccccc2C)cc1	6011089	pubchem(AID=1325)	%inhibition at 6.6 uM	-19.4	0
1916	o1c2c(nc1-c1ccc(NC(=O)c3cc([N+](=O)[O-])c(N4CCOCC4)cc3)cc1)cc(OC)cc2	2980171	pubchem(AID=1325)	%inhibition at 6.6 uM	-19.35	0
1917	s1c2c(nc1Nc1sc3cc(ccc3n1)C(OC)=O)c(F)cc(F)c2	7110073	pubchem(AID=1325)	%inhibition at 6.6 uM	-19.26	0
1918	Clc1cc(Cl)cc(C(=O)c2cc3c(onc3C(C)C)nc2)c1O	2094089	pubchem(AID=1325)	%inhibition at 6.6 uM	-19.23	0
1919	S=C(Nc1cc(OC)ccc1)N=Nc1c2c(n(CC=C)c1O)cccc2	6296179	pubchem(AID=1325)	%inhibition at 6.6 uM	-19.21	0
1920	O1CCN(CC1)C=1/C(/CCCC=1C(=O)Nc1cc(OC)c(OC)c(OC)c1)=C\c1ccc(N(C)C)cc1	12006243	pubchem(AID=1325)	%inhibition at 6.6 uM	-19.2	0
1921	S=C(NCc1ccc(cc1)CNC(=S)NCC=C)NCC=C	2426891	pubchem(AID=1325)	%inhibition at 6.6 uM	-19.17	0
1922	Clc1ccc(NC(=O)CSC2=Nc3c(cccc3)C(=O)N2c2ccc(F)cc2)cc1S(=O)(=O)N1CCOCC1	3624441	pubchem(AID=1325)	%inhibition at 6.6 uM	-19.12	0
1923	s1cccc1\C=C/1\CCCc2c\1nc1c(cccc1)c2C(OCC(=O)Nc1ccc(cc1)C(=O)C)=O	15944938	pubchem(AID=1325)	%inhibition at 6.6 uM	-19.08	0
1924	S1/C(=C\C=C\c2ccccc2)/C(=O)N(CCC(=O)Nc2sc3c(n2)cccc3)C1=S	1320583	pubchem(AID=1325)	%inhibition at 6.6 uM	-19.04	0
1925	S(=O)(=O)(NC)c1cc(ccc1)C(OCC(=O)Nc1cc2c3c(n(c2cc1)CC)cccc3)=O	2453706	pubchem(AID=1325)	%inhibition at 6.6 uM	-19.03	0
1926	S(=O)(=O)(NC1CCCCC1)c1cc(ccc1)-c1oc(nn1)-c1ccccc1	1279674	pubchem(AID=1325)	%inhibition at 6.6 uM	-18.93	0
1927	s1c(\C=N\Nc2ccccc2)c(-c2ccccc2)c(C(OCC)=O)c1\N=C\N(C)C	9624661	pubchem(AID=1325)	%inhibition at 6.6 uM	-18.87	0
1928	s1cccc1C1=NN(C(=S)Nc2ccccc2)C(C1)c1cc(OC)c(OC)cc1	2953172	pubchem(AID=1325)	%inhibition at 6.6 uM	-18.82	0
1929	s1c2c(CC(OC2)(CC)C)c2c1NC(=S)N(Cc1ccccc1)C2=O	2870135	pubchem(AID=1325)	%inhibition at 6.6 uM	-18.75	0
1930	S(=O)(=O)(NC1(P(OCCCC)(OCCCC)=O)C=CC(=O)c2c1cccc2)c1ccccc1	4441046	pubchem(AID=1325)	%inhibition at 6.6 uM	-18.7	0
1931	s1c(C(OCC)=O)c(cc1Nc1sc2cc(OC)ccc2n1)C	6622210	pubchem(AID=1325)	%inhibition at 6.6 uM	-18.5	0
1932	O(C(=O)c1ccc(NC(=O)C2C3CC(C=C3)C2C(=O)[O-])cc1)CC	4402411	pubchem(AID=1325)	%inhibition at 6.6 uM	-18.49	0
1933	o1cccc1CN1CC23OC(C=C2)C(C3C1=O)C(OCC)=O	645136	pubchem(AID=1325)	%inhibition at 6.6 uM	-18.48	0
1934	OCCn1nc(/C(=C\c2ccc(cc2)\C=C(/C#N)\c2nn(CCO)c(N)c2C#N)/C#N)c(C#N)c1N	5756028	pubchem(AID=1325)	%inhibition at 6.6 uM	-18.35	0
1935	S(=O)(=O)(Nc1nc2c(nc1Nc1ccc(S(=O)(=O)N)cc1)cccc2)c1ccc(NC(=O)C)cc1	1963468	pubchem(AID=1325)	%inhibition at 6.6 uM	-18.34	0
1936	O(C)c1ccc(cc1N)Cc1cc(N)c(OC)cc1	796517	pubchem(AID=1325)	%inhibition at 6.6 uM	-18.33	0
1937	Clc1ccc(S(=O)(=O)n2nc(nc2SC)-c2occc2)cc1	1290352	pubchem(AID=1325)	%inhibition at 6.6 uM	-18.23	0
1938	S1(=O)(=O)N(CC(=O)N(C(C(=O)NCC2OCCC2)c2ccncc2)CCc2ccccc2C)C(=O)c2c1cccc2	3192413	pubchem(AID=1325)	%inhibition at 6.6 uM	-18.23	0
1939	s1c2c(N(S(=O)(=O)C(C(=S)Nc3ccccc3)=C2[O-])C)cc1	6610448	pubchem(AID=1325)	%inhibition at 6.6 uM	-18.09	0
1940	S(=O)(=O)(Nc1ccccc1C(=O)[O-])c1cc([N+](=O)[O-])c(N[N-]C(=S)Nc2ccc(OC(F)F)cc2)cc1	4836362	pubchem(AID=1325)	%inhibition at 6.6 uM	-18.08	0
1941	Clc1cc(Cl)ccc1Cc1sc(nc1)NC(=O)\C(=C\c1c2c([nH]c1)cccc2)\C#N	1387465	pubchem(AID=1325)	%inhibition at 6.6 uM	-18.06	0
1942	o1cccc1C1CC(=O)\C(=C\NCCO)\C(=O)C1	1906879	pubchem(AID=1325)	%inhibition at 6.6 uM	-18.04	0
1943	O=C(N\N=C\c1c2c(cc3c1cccc3)cccc2)c1nc2n(n1)C(=CC(=N2)C)C	6867389	pubchem(AID=1325)	%inhibition at 6.6 uM	-18.03	0
1944	s1cc(nc1N=Nc1c2c(n(C)c1O)cccc2)-c1ccccc1	5962296	pubchem(AID=1325)	%inhibition at 6.6 uM	-18.01	0
1945	O=C(Nc1ccccc1)NC(Nc1nc(c2c(n1)c(cc(c2)C)C)C)=N	9586612	pubchem(AID=1325)	%inhibition at 6.6 uM	-17.99	0
1946	S1c2c(N(c3c1cccc3)C(=O)NC(Nc1nc(c3c(n1)cc(cc3)C)C)=N)cccc2	5543869	pubchem(AID=1325)	%inhibition at 6.6 uM	-17.98	0
1947	S(=O)(=O)(N(C)C)c1cc2n(OCC(=O)Nc3cc(F)c(cc3)C)nnc2cc1	2567175	pubchem(AID=1325)	%inhibition at 6.6 uM	-17.95	0
1948	o1c2c(nc1-c1cc3c(cc1)cccc3)cc(NC(=O)c1cc3OCCOc3cc1)cc2	4378441	pubchem(AID=1325)	%inhibition at 6.6 uM	-17.93	0
1949	Clc1ccc(cc1)C1(NC(=S)N(N1)c1ccc(cc1)C)CC	3820030	pubchem(AID=1325)	%inhibition at 6.6 uM	-17.9	0
1950	Brc1ccc(cc1)C(=O)NCC(=O)NCC(OCC(=O)c1ccc([N+](=O)[O-])cc1)=O	2166417	pubchem(AID=1325)	%inhibition at 6.6 uM	-17.88	0
1951	FC(F)(F)c1ccc(nc1)N1N=C(CC1=O)C	1040275	pubchem(AID=1325)	%inhibition at 6.6 uM	-17.83	0
1952	O=C\1CC(CC(=O)/C/1=C\c1cc(n(c1C)-c1ccc(cc1)C)C)(C)C	2337848	pubchem(AID=1325)	%inhibition at 6.6 uM	-17.82	0
1953	O=C1N(CC(=O)c2c3c([nH]c2C)cccc3)C(=O)NC12CC(CC(C2)C)(C)C	3535755	pubchem(AID=1325)	%inhibition at 6.6 uM	-17.77	0
1954	Brc1cc2c(nc(cc2C(=O)N(Cc2cnn(C)c2C)C)-c2ccc(cc2)C)cc1	1312703	pubchem(AID=1325)	%inhibition at 6.6 uM	-17.76	0
1955	s1cc(nc1NC(=O)c1cc2N=C3N(CCCCC3)C(=O)c2cc1)-c1ccc(cc1)C	2529822	pubchem(AID=1325)	%inhibition at 6.6 uM	-17.74	0
1956	Clc1ccc(cc1)CSc1sc(nn1)NC(=O)Nc1ccc(Cl)cc1	1880576	pubchem(AID=1325)	%inhibition at 6.6 uM	-17.72	0
1957	s1c(C(OCC)=O)c(nc1NC(=O)CN1N=Nc2sc3CC(CCc3c2C1=O)C(C)(C)C)C	3227935	pubchem(AID=1325)	%inhibition at 6.6 uM	-17.71	0
1958	s1cccc1\C=C\1/CC(C\C(=C\c2sccc2)\C/1=O)C	1715542	pubchem(AID=1325)	%inhibition at 6.6 uM	-17.7	0
1959	O=C1N(C(=Nc2c1cccc2)CCCN1C(=O)c2c(cccc2)C1=O)c1cccnc1	1208213	pubchem(AID=1325)	%inhibition at 6.6 uM	-17.68	0
1960	O=C1NN=C(C1)CC(=O)N\N=C\c1ccccc1[N+](=O)[O-]	5343497	pubchem(AID=1325)	%inhibition at 6.6 uM	-17.65	0
1961	Clc1ccc([N+](=O)[O-])cc1\C=N\n1c(nnc1S)COc1ccccc1	6887862	pubchem(AID=1325)	%inhibition at 6.6 uM	-17.64	0
1962	S=C(Nc1ccccc1C(F)(F)F)[N-]\N=C\c1cc(OCC)c(OCC(=O)N2CCOCC2)cc1	9684224	pubchem(AID=1325)	%inhibition at 6.6 uM	-17.64	0
1963	Brc1sc(cc1)\C=N\c1ccc(Nc2ccccc2)cc1	1250065	pubchem(AID=1325)	%inhibition at 6.6 uM	-17.56	0
1964	s1cc(nc1NC(=O)CSc1nsc(SCC(=O)Nc2scc(n2)C)c1C#N)C	658035	pubchem(AID=1325)	%inhibition at 6.6 uM	-17.55	0
1965	Clc1cc(ccc1)-c1oc(cc1)\C=C/1\C(=O)N(C)C(=O)N(C)C\1=O	3647454	pubchem(AID=1325)	%inhibition at 6.6 uM	-17.47	0
1966	s1cc(nc1NC(=O)CSC=1N=C2N=C3C(=C2NN=1)C=CC=C3)-c1ccc(cc1)C	5740367	pubchem(AID=1325)	%inhibition at 6.6 uM	-17.47	0
1967	Clc1cc(cnc1N[N-]C(=S)Nc1cccnc1)C(F)(F)F	2476054	pubchem(AID=1325)	%inhibition at 6.6 uM	-17.46	0
1968	S1\C(=C/2\c3c(N(C(=O)C)C\2=O)cccc3)\C(=O)N(C=2C(=O)N(N(C)C=2C)c2ccccc2)C1=S	2829688	pubchem(AID=1325)	%inhibition at 6.6 uM	-17.4	0
1969	s1c2cc(ccc2nc1NC(=O)\C=C\c1cc2OCOc2cc1)C	741152	pubchem(AID=1325)	%inhibition at 6.6 uM	-17.4	0
1970	Clc1ccc(cc1)-c1nn2c(N=C(C=C2O)c2ccc([N+](=O)[O-])cc2)c1	1111658	pubchem(AID=1325)	%inhibition at 6.6 uM	-17.35	0
1971	s1c2cc(ccc2nc1-c1ccc(NC(=O)COC(=O)c2cc(S(=O)(=O)N(CC)CC)c(F)cc2)cc1)C	2338024	pubchem(AID=1325)	%inhibition at 6.6 uM	-17.34	0
1972	O1c2cc(\C=C/3\C(=O)N(NC\3=O)c3cc(C)c(cc3)C)c([N+](=O)[O-])cc2OC1	2251180	pubchem(AID=1325)	%inhibition at 6.6 uM	-17.26	0
1973	Clc1ccccc1C(=O)Nc1cc(NC(=S)NC(=O)\C=C\c2cc([N+](=O)[O-])ccc2)ccc1	1343954	pubchem(AID=1325)	%inhibition at 6.6 uM	-17.23	0
1974	s1c(ccc1\C=C/1\C(=O)N(c2ccccc2F)C(=S)NC\1=O)C	886529	pubchem(AID=1325)	%inhibition at 6.6 uM	-17.21	0
1975	O=C1N(N)C(=O)c2c3c1ccc(c3ccc2)C(=O)[O-]	786782	pubchem(AID=1325)	%inhibition at 6.6 uM	-17.17	0
1976	o1c2c(N(CC(=O)Nc3ccc(OC)cc3OC)C(=O)N(C2=O)c2ccccc2)c2c1cccc2	15944831	pubchem(AID=1325)	%inhibition at 6.6 uM	-17.17	0
1977	S=C(NC(=O)c1ccccc1)N1CCc2c1cccc2	833366	pubchem(AID=1325)	%inhibition at 6.6 uM	-17.12	0
1978	s1c(SCCC(=O)[O-])nnc1SCC(=O)NCC(F)(F)F	2490216	pubchem(AID=1325)	%inhibition at 6.6 uM	-17.08	0
1979	O1C=C(Oc2ccccc2)C(=O)c2c1c(OC(=O)C)c(OC(=O)C)cc2	1333153	pubchem(AID=1325)	%inhibition at 6.6 uM	-17.02	0
1980	Clc1ccc(cc1)CSCc1sc(nn1)NC(=O)Nc1ccc(Cl)cc1	1942504	pubchem(AID=1325)	%inhibition at 6.6 uM	-16.99	0
1981	Oc1cc(ccc1O)\C=N/N(C)c1nc(cc(n1)-c1ccccc1)-c1ccccc1	11979304	pubchem(AID=1325)	%inhibition at 6.6 uM	-16.97	0
1982	S(=O)(=O)(N(CC)CC)c1cc2c(N(C=C(C(=O)NCc3cc4OCOc4cc3)C2=O)C)cc1	9551728	pubchem(AID=1325)	%inhibition at 6.6 uM	-16.96	0
1983	s1c(nnc1SCC(=O)Nc1cc(S(=O)(=O)N(C)c2ccccc2)ccc1)N	4965091	pubchem(AID=1325)	%inhibition at 6.6 uM	-16.93	0
1984	Clc1ccccc1NC(=S)[N-]Nc1c2c([nH+]cc1)cc(Cl)cc2	2343881	pubchem(AID=1325)	%inhibition at 6.6 uM	-16.91	0
1985	S(=O)(=O)(N1CCOCC1)c1cc2c(n(C)c(O)c2N=NC(=S)Nc2cc(cc(c2)C)C)cc1	6012385	pubchem(AID=1325)	%inhibition at 6.6 uM	-16.78	0
1986	O(C)c1cc(ccc1)\C=C/1\c2c(cccc2)C(=O)N(C\1=O)c1cc(ccc1)C	2109969	pubchem(AID=1325)	%inhibition at 6.6 uM	-16.76	0
1987	O(C)c1cc(ccc1O)C1C2=C(N(C(N)=C1C#N)c1cccnc1)CC(CC2=O)(C)C	3157948	pubchem(AID=1325)	%inhibition at 6.6 uM	-16.66	0
1988	Brc1ccccc1C(=O)Nc1cc(S(=O)(=O)Nc2ccccc2OC)c(N(CC)CC)cc1	4195720	pubchem(AID=1325)	%inhibition at 6.6 uM	-16.65	0
1989	Oc1c2NC(C3C(C=CC3)c2ccc1)C(=O)[O-]	654089	pubchem(AID=1325)	%inhibition at 6.6 uM	-16.64	0
1990	Clc1ccccc1Cc1sc(nc1)N1C(=O)C(SC1=N)c1ccccc1	4880464	pubchem(AID=1325)	%inhibition at 6.6 uM	-16.63	0
1991	S(C(F)F)c1ccc(cc1)-c1oc(cc1)\C=C(\C(=O)Nc1n(nc(c1)C)-c1ccccc1)/C#N	6011596	pubchem(AID=1325)	%inhibition at 6.6 uM	-16.58	0
1992	s1c2c(nc1SCC(=O)Nc1cc(S(=O)(=O)N3CCOCC3)ccc1O)cccc2	3657896	pubchem(AID=1325)	%inhibition at 6.6 uM	-16.58	0
1993	Clc1cc(NC(=O)[N-]Nc2ccc([N+](=O)[O-])cc2S(=O)(=O)N(CC)CC)ccc1Cl	3630556	pubchem(AID=1325)	%inhibition at 6.6 uM	-16.56	0
1994	s1c2c(nc1/C(=C/c1cc(OC)c(OCC(=O)Nc3ccccc3)cc1)/C#N)cccc2	5769210	pubchem(AID=1325)	%inhibition at 6.6 uM	-16.54	0
1995	O(C)c1ccc(NC(=O)c2ccc(NC(=O)COC(=O)C(CC)c3ccccc3)cc2)cc1	4241520	pubchem(AID=1325)	%inhibition at 6.6 uM	-16.49	0
1996	S(=O)(=O)(Nc1nc(cc(n1)C)C)c1ccc(NC(=O)c2cc(nc3c2cccc3)-c2ccccc2)cc1	2308203	pubchem(AID=1325)	%inhibition at 6.6 uM	-16.46	0
1997	o1nc(cc1-c1ccccc1)C(=O)[O-]	151916	pubchem(AID=1325)	%inhibition at 6.6 uM	-16.41	0
1998	Clc1cc(ccc1)-c1oc(cc1)\C=C/1\C(N2OC(=CC2=NC\1=O)C)=N	1965991	pubchem(AID=1325)	%inhibition at 6.6 uM	-16.4	0
[truncated: 801 more rows]

## Sheet: Table S2
Table S2. The search space of Bayesian optimization and the optimal hyper-parameters determined by Bayesian optimization for all the studied models.
Model	Hyper‑parameters	Search Space	Optimal Hyper‑parameters
NB	laplace: value used for Laplace smoothing (numeric) usekernel: distribution type (logical) adjust: bandwidth adjustment (numeric)	laplace: [0.1,10] usekernel: True or Flase adjust: [0.1,10]	laplace: 7.54144283928465 usekernel: True adjust: 0.100576681800882
k-NN	kmax: maximum number of k (integer) distance: parameter of Minkowski distance (numeric) kernel: kernel to use (character )	kmax: [3,15] distance: [1,3] kernel:"triangular","rectangular","epanechnikov","optimal","biweight","triweight","cos","inv","gaussian","rank"	kmax: 15 distance: 1.03964375326259 kernel: "rank"
RLR	cost: cost of constraints violation (numeric) loss: loss function (character) epsilon: tolerance of termination criterion for optimization (numeric )	cost: [1,10] loss: "L1", "L2_dual" and "L2_primal" epsilon: [0.1,1]	cost: 1.00234947165392 loss: "L2_primal" epsilon: 0.130570889556206
SVM	sigma: the kernel width (numeric) C: cost of constraints violation (numeric)	sigma: [0.005,0.02] C: [5,20]	sigma: 0.0130006814137995 C: 6.08098769064484
SGB	n.trees: the total number of trees to fit (integer) interaction.depth: the maximum depth of each tree (integer) n.minobsinnode: the minimum number of observations in the terminal nodes of the trees (integer) shrinkage: a shrinkage parameter applied to each tree in the expansion (numeric)	n.trees: [160,200] interaction.depth: [20,35] n.minobsinnode: [20,30] shrinkage: [0.001,0.1]	n.trees: 179 interaction.depth: 35 n.minobsinnode: 26 shrinkage: 0.0932939021771154
XGBoost	nrounds:boosting iterations (integer) max_depth: maximum depth of the tree (integer) eta: shrinkage (numeric) gamma: minimum loss reduction (numeric) colsample_bytree: subsample ratio of columns (numeric) min_child_weight: minimum sum of instance weight (numeric) subsample: subsample percentage (numeric)	nrounds: [200,300] max_depth: [9,11] eta: [0.01,0.1] gamma: [0.4,0.6] colsample_bytree: [0.4,0.6] min_child_weight: [0.7,0.9] subsample: [0.7,0.9]	nrounds: 210 max_depth: 15 eta: 0.0756131466679135 gamma: 0.46200062709637 colsample_bytree: 0.475267963939626 min_child_weight: 0.769156801893376 subsample: 0.740031271164399
DNN	mini_batch_size: mini-batch size (integer) l2: L2 regularization (numeric) rho: adaptive learning rate time decay factor (numeric) epsilon: adaptive learning rate smoothing factor (numeric) input_dropout_ratio: input layer dropout ratio (numeric) hidden_dropout_ratio: hideen layer dropout ratio (numeric) hidden_layers: hideen layers (integer) hidden_layer_units: hidden units for all hidden lays (…	mini_batch_size: [1,32] l2: [0,0.01] rho: [0.9,0.999] epsilon: [1e-10,1e-7] input_dropout_ratio: [0,0.2] hidden_dropout_ratios: [0,0.3] hidden_layers: [2,5] hidden_layer_units: [100,300]	mini_batch_size: 2 l2: 0.000896871285824059 rho: 0.964178441767299 epsilon: 6.65330782929858e-09 input_dropout_ratio: 0.0672305919617168 hidden_dropout_ratio: 0.139116530380509 hidden_layers:3 hidden_layer_units:265

## Sheet: Table S3
Table S3. The detailed descriptions of the 65 representative descriptors chosen by rfSA.
Descriptor	Class	Description
weinerPol	2D	Weiner polarity number
vsurf_IW3	i3D	Hydrophilic integy moment at -1.0
vsurf_ID8	i3D	Hydrophobic integy moment at -1.6
vsurf_ID4	i3D	Hydrophobic integy moment at -0.8
vsurf_EWmin2	i3D	2nd lowest hydrophilic energy
vsurf_EDmin1	i3D	Lowest hydrophobic energy
vsurf_DW13	i3D	vsurf_EWmin1, vsurf_EWmin3 distance
vsurf_DD12	i3D	vsurf_EDmin1, vsurf_EDmin2 distance
vsurf_D8	i3D	Hydrophobic volume at -1.6
vsurf_CW6	i3D	Capacity factor at -4.0
vsurf_CW3	i3D	Capacity factor at -1.0
vsa_acc	2D	VDW acceptor surface area (A**2)
std_dim2	i3D	Standard dimension 2
SMR_VSA4	2D	Bin 4 SMR (0.390,0.440]
SlogP_VSA7	2D	Bin 7 SlogP ( 0.25, 0.30]
SlogP_VSA5	2D	Bin 5 SlogP ( 0.15, 0.20]
SlogP_VSA4	2D	Bin 4 SlogP ( 0.10, 0.15]
SlogP_VSA1	2D	Bin 1 SlogP (-0.40,-0.20]
Q_VSA_POS	2D	Total positive vdw surface area
Q_VSA_FNEG	2D	Fractional negative vdw surface area
petitjeanSC	2D	(diameter - radius) / radius
PEOE_VSA_PPOS	2D	Total polar positive vdw surface area
PEOE_VSA_FPPOS	2D	Fractional polar positive vdw surface area
PEOE_VSA_FPOS	2D	Fractional positive vdw surface area
PEOE_VSA_FPNEG	2D	Fractional polar negative vdw surface area
PEOE_VSA_FHYD	2D	Fractional hydrophobic vdw surface area
PEOE_VSA+6	2D	Total positive 6 vdw surface area
PEOE_VSA+4	2D	Total positive 4 vdw surface area
PEOE_VSA-3	2D	Total negative 3 vdw surface area
PEOE_VSA+3	2D	Total positive 3 vdw surface area
PEOE_VSA+2	2D	Total positive 2 vdw surface area
PEOE_VSA-1	2D	Total negative 1 vdw surface area
PEOE_VSA-0	2D	Total negative 0 vdw surface area
PEOE_RPC+	2D	Relative positive partial charge
opr_violation	2D	Oprea Violation Count
opr_nring	2D	Oprea Ring Count
opr_leadlike	2D	Oprea Leadlike Test
MNDO_dipole	i3D	The dipole moment calculated using the MNDO Hamiltonian
logP(o/w)	2D	Log octanol/water partition coefficient
lip_don	2D	Lipinski Donor Count
Kier3	2D	Third kappa shape index
h_pstates	2D	Entropic state count (pH=7)
h_pKb	2D	Basicity (pH=7)
h_ema	2D	Sum of EHT acceptor strengths
glob	i3D	Molecular globularity
GCUT_SMR_2	2D	Molar Refractivity GCUT (2/3)
GCUT_SMR_0	2D	Molar Refractivity GCUT (0/3)
GCUT_SLOGP_0	2D	LogP GCUT (0/3)
GCUT_PEOE_0	2D	PEOE Charge GCUT (0/3)
FASA_H	i3D	Fractional hydrophobic surface area
FASA-	i3D	Fractional negative accessible surface area
dipoleY	x3D	Dipole moment (Y)
DASA	i3D	Absolute difference in surface area
chiral_u	2D	Number of unconstrained chiral centers
chiral	2D	Number of chiral centers
BCUT_SLOGP_2	2D	LogP BCUT (2/3)
BCUT_SLOGP_0	2D	LogP BCUT (0/3)
balabanJ	2D	Balaban averaged distance sum connectivity
b_ar	2D	Number of aromatic bonds
ast_violation_ext	2D	Astex Fragment-like Violation Count (Extended)
ast_violation	2D	Astex Fragment-like Violation Count
ast_fraglike	2D	Astex Fragment-like Test
ASA-	i3D	Negative accessible surface area
a_nO	2D	Number of oxygen atoms
a_nH	2D	Number of hydrogen atoms

## Sheet: Table S4
Table S4. The detailed descriptions of the 79 representative fingerprints chosen by rfSA.
No.Fingerprint	Description	Bit Substructurea
PubchemFP797	Complex SMARTS patterns	CC1CC(C)CCC1
PubchemFP776	Complex SMARTS patterns	CC1CCC(C)CC1
PubchemFP758	Complex SMARTS patterns	Cc1c(N)cccc1
PubchemFP756	Complex SMARTS patterns	Cc1c(O)cccc1
PubchemFP740	Complex SMARTS patterns	Oc1cc(O)ccc1
PubchemFP714	Complex SMARTS patterns	Cc1ccc(O)cc1
PubchemFP707	Simple SMARTS patterns	O=C-C-C-C-C(N)-C
PubchemFP696	Simple SMARTS patterns	C-C-C-C-C-C-C-C
PubchemFP695	Simple SMARTS patterns	O=C-C-C-C-C-N
PubchemFP688	Simple SMARTS patterns	C-C-C-C-C-C-C
PubchemFP687	Simple SMARTS patterns	O=C-C-C-C=O
PubchemFP686	Simple SMARTS patterns	O=C-C-C-C-O
PubchemFP684	Simple SMARTS patterns	O=C-C-C-C-C
PubchemFP667	Simple SMARTS patterns	C=C-C-O-[#1]
PubchemFP663	Simple SMARTS patterns	O-C-C-O-[#1]
PubchemFP658	Simple SMARTS patterns	C-C-S-C-C
PubchemFP652	Simple SMARTS patterns	O-C:C:C-N
PubchemFP647	Simple SMARTS patterns	O=C-N-C-N
PubchemFP644	Simple SMARTS patterns	C-C=N-N-C
PubchemFP636	Simple SMARTS patterns	C-N-C-N-C
PubchemFP632	Simple SMARTS patterns	C-C-O-C:C
PubchemFP628	Simple SMARTS patterns	C-N-C-C:C
PubchemFP615	Simple SMARTS patterns	N-C-C-O-C
PubchemFP605	Simple SMARTS patterns	O=C-C-O-C
PubchemFP580	Simple SMARTS patterns	O=C-C-C-N
PubchemFP577	Simple SMARTS patterns	C:C-N-C:C
PubchemFP569	Simple SMARTS patterns	N-C-C-N
PubchemFP566	Simple SMARTS patterns	O-C-C-N
PubchemFP555	Simple SMARTS patterns	N=C-C=C
PubchemFP548	Simple SMARTS patterns	O-C-C:C
PubchemFP547	Simple SMARTS patterns	N-C:C-N
PubchemFP539	Simple SMARTS patterns	N=C-C-[#1]
PubchemFP536	Simple SMARTS patterns	O=C-C-N
PubchemFP532	Simple SMARTS patterns	S-C:C-[#1]
PubchemFP530	Simple SMARTS patterns	N:C-C:C
PubchemFP518	Simple SMARTS patterns	O=C-N-N
PubchemFP515	Simple SMARTS patterns	N-N-C-C
PubchemFP508	Simple SMARTS patterns	S=C-N-C
PubchemFP507	Simple SMARTS patterns	C-C-S-C
PubchemFP498	Simple SMARTS patterns	O-C=C-C
PubchemFP493	Simple SMARTS patterns	O=C-C:C
PubchemFP483	Simple SMARTS patterns	N-S-C:C
PubchemFP480	Simple SMARTS patterns	C:S:C-C
PubchemFP477	Simple SMARTS patterns	N-N-C:C
PubchemFP464	Simple SMARTS patterns	N-C-C=C
PubchemFP459	Detailed atom neighborhoods	S(=O)(=O)
PubchemFP452	Detailed atom neighborhoods	C(-O)(=O)
PubchemFP448	Detailed atom neighborhoods	C(-H)(=O)
PubchemFP439	Detailed atom neighborhoods	C(-C)(-N)(=O)
PubchemFP437	Detailed atom neighborhoods	C(-C)(-N)(=C)
PubchemFP432	Detailed atom neighborhoods	C(-C)(-C)(=O)
PubchemFP431	Detailed atom neighborhoods	C(-C)(-C)(=N)
PubchemFP422	Detailed atom neighborhoods	N=N
PubchemFP421	Detailed atom neighborhoods	C=S
PubchemFP406	Simple atom nearest neighbors	O(~C)(~H)
PubchemFP403	Simple atom nearest neighbors	N(:C)(:C)
PubchemFP399	Simple atom nearest neighbors	N(~H)(:C)
PubchemFP397	Simple atom nearest neighbors	N(~C)(:C)(:C)
PubchemFP390	Simple atom nearest neighbors	N(~C)(~C)
PubchemFP378	Simple atom nearest neighbors	C(~N)(:C)(:N)
PubchemFP377	Simple atom nearest neighbors	C(~N)(:C)(:C)
PubchemFP367	Simple atom nearest neighbors	C(~H)(~O)(~O)
PubchemFP349	Simple atom nearest neighbors	C(~C)(~H)(~S)
PubchemFP34	Hierarchic Element Counts	>= 2 S
PubchemFP339	Simple atom nearest neighbors	C(~C)(~C)(~H)(~O)
PubchemFP338	Simple atom nearest neighbors	C(~C)(~C)(~H)(~N)
PubchemFP335	Simple atom nearest neighbors	C(~C)(~C)(~C)(~H)
PubchemFP293	Simple atom pairs	C-S
PubchemFP287	Simple atom pairs	C-F
PubchemFP206	Rings in a canonic ESSR ring set	>= 5 any ring size 6
PubchemFP20	Hierarchic Element Counts	>= 4 O
PubchemFP192	Rings in a canonic ESSSR ring set	>= 3 any ring size 6
PubchemFP185	Rings in a canonic ESSR ring set	>= 2 any ring size 6
PubchemFP184	Rings in a canonic ESSSR ring set	>= 1 unsaturated non-aromatic heteroatom-containing ring size 6
PubchemFP156	Rings in a canonic ESSSR ring set	>= 2 unsaturated non-aromatic heteroatom-containing ring size 5
PubchemFP150	Rings in a canonic ESSSR ring set	>= 2 any ring size 5
PubchemFP15	Hierarchic Element Counts	>= 2 N
PubchemFP149	Rings in a canonic ESSR ring set	>= 1 unsaturated non-aromatic heteroatom-containing ring size 5
PubchemFP143	Rings in a canonic ESSSR ring set	>= 1 any ring size 5
aFor rings in a canonic ring set fingerprints, these bits test for the presence or count of the described chemical ring system. For simple atom pairs fingerprints, these bits test for the presence of patterns of bonded atom pairs, regardless of bond order or count. For simple atom nearest neighbors, these bits test for the presence of atom nearest neighbor patterns, regardless of bond order (deno…

## Sheet: Table S5
Table S5: The detailed descriptions of the misclassified molecules given by the SVM mode1.
No.	Smiles	Structure	Obsa	SVM_Predb	Labelc	Num of Chiral Centers	b_rotNd
3	s1c2c(nc1NC)c(Cc1cccnc1)c(C)c(OS(=O)(=O)[O-])c2C	C16H16N3O4S2-	1	0	FN	0	5
26	Clc1ccc(cc1C(=O)NCC12CC3CC(C1)CC(C2)C3)CCC[NH2+]CCCO	C24H36ClN2O2+	1	0	FN	0	11
90	O1C(CO)C(O)C(O)C(O)C1Oc1cc(O)c2c(OC(=CC2=O)c2ccc(O)cc2)c1	C21H20O10	1	0	FN	0	4
157	O(C)c1cc(ccc1)C(=O)\C=C\c1cc2c(cc1)cccc2	C20H16O2	0	1	FP	0	4
214	OC=1C(=O)C=C2C(=CC=C3[C@]4(CC[C@@]5([C@@H](C[C@@](CC5)(C(=O)[O-])C)[C@@]4(CC[C@@]23C)C)C)C)C=1C	C29H37O4-	1	0	FN	7	1
217	O1[C@H]([C@]2([C@@]3(O[C@@H]3C1=O)[C@]1([C@@H]([C@]34[C@@H](CC1=O)C(O[C@H]3CC(OC4)=O)(C)C)CC2)C)C)c1ccoc1	C26H30O8	1	0	FN	9	1
221	Oc1c(O)cc(cc1O)C(OCCC)=O	C10H12O5	1	0	FN	0	4
237	O(C)c1c(OC)c(OC)ccc1C(=O)\C=C\c1ccccc1	C18H18O4	0	1	FP	0	6
239	Clc1ccc(cc1)\C=C\C(=O)c1ccc(OC)c(OC)c1OC	C18H17ClO4	0	1	FP	0	6
297	Clc1ccc(cc1)C(=O)Nc1ccccc1C(=O)Nc1ccc(OC)cc1	C21H17ClN2O3	0	1	FP	0	7
472	s1cccc1C(=O)C1=Cc2c(OC1=O)cc(N(CC)CC)cc2	C18H17NO3S	1	0	FN	0	5
486	O1C=C(C(=O)c2c1cc(O)cc2)c1ccc(O)cc1	C15H10O4	1	0	FN	0	1
487	O1c2c(C(=O)C=C1C)c(OC)c1c(occ1)c2OC	C14H12O5	1	0	FN	0	2
586	n1cnc2c(n3c(CCCC3)c2C#N)c1NCCc1ccccc1	C19H19N5	0	1	FP	0	5
774	O(CC(=O)Nc1cc(ccc1O)C(OC)=O)c1ccc(cc1)C12CC3CC(C1)CC(C2)C3	C26H29NO5	1	0	FN	0	8
775	O1c2c(C=CC1(C)C)c1OC[C@]3(O)[C@@H](Oc4cc(O)ccc34)c1cc2	C20H18O5	1	0	FN	2	0
782	[nH]1nc(nc1-c1ccncc1)-c1cc(ncc1)C#N	C13H8N6	1	0	FN	0	3
829	Clc1cc(Cl)cc2c1cc(c1c2cc(cc1)C(F)(F)F)C(O)CC[NH+](CCCC)CCCC	C26H31Cl2F3NO+	0	1	FP	0	11
887	s1c2nc(C)c(C(OCC)=O)c(c2c(N)c1C(=O)c1ccc(OC)cc1)-c1ccc(OCCCC)cc1	C29H30N2O5S	0	1	FP	0	11
933	Clc1c(cccc1Cl)[C@H]1C(C(OCC)=O)=C(NC(C)=C1C(OC)=O)C	C18H19Cl2NO4	1	0	FN	1	6
942	Clc1cc(Cl)ccc1[C@@]1(O[C@H](CO1)COc1ccc(N2CCN(CC2)C(=O)C)cc1)Cn1ccnc1	C26H28Cl2N4O4	1	0	FN	3	8
995	Clc1cc2c(NC(O[C@]2(C#CC2CC2)C(F)(F)F)=O)cc1	C14H9ClF3NO2	1	0	FN	2	3
1004	Clc1ccc(cc1)-c1c2n(nc1C)C(N1CCN(CC1)C(=O)c1occc1)=CC(=N2)C(C)(C)C	C26H28ClN5O2	0	1	FP	0	5
1082	Fc1ccc(cc1)Cn1c2c(nc1NC1CC[NH+](CC1)CCc1ccc(OC)cc1)cccc2	C28H32FN4O+	1	0	FN	0	8
1123	O(C)c1c(cccc1OC)CNc1ccccc1CCc1cc(OC)ccc1	C24H27NO3	1	0	FN	0	9
1128	O(C)c1c2c(Nc3c(cccc3)C2=O)ccc1OC	C15H13NO3	0	1	FP	0	2
1185	O(C)c1cc2CC[N@H+](Cc2cc1OC)CCc1ccc(NC(=O)c2cc3c(nc2)cccc3)cc1	C29H30N3O3+	0	1	FP	1	8
1271	O(CCOCCOCCOC)c1cc2c(cc1OC)CC[N@H+](C2)CCc1ccc(NC(=O)c2cc(NC(=O)c3nc4c(cc3)cccc4)c(cc2)C(=O)[O-])cc1	C43H46N4O9	1	0	FN	1	21
1273	O(CCOc1ccc(cc1)C(=O)c1ccccc1)c1ccccc1OC	C22H20O4	0	1	FP	0	8
1282	O(Cc1ccccc1)c1ccc(cc1)\C=C(/OC)\C(=O)N\C=C\c1ccc(O)cc1	C25H23NO4	0	1	FP	0	9
1327	O1[C@H](CO)[C@@H](O)[C@H](O)[C@@H](O)[C@@H]1Oc1cc(O)c2c(O[C@@H](CC2=O)c2ccc(O)cc2)c1	C21H22O10	1	0	FN	6	4
1331	O1[C@](NC(=O)[C@@H]2C=C3[C@H]([N@@H+](C2)C)Cc2c4c3cccc4[nH]c2)(C(C)C)C(=O)N2[C@@H](Cc3ccccc3)C(=O)N3[C@@H](CCC3)[C@]12O	C35H40N5O5+	1	0	FN	8	6
1363	O1c2c(C(=O)C=C1c1cc(O)c(OC)cc1)c(O)cc(O[C@@H]1O[C@H](CO[C@@H]3O[C@@H](C)[C@H](O)[C@@H](O)[C@H]3O)[C@@H](O)[C@H](O)[C@H]1O)c2	C28H32O15	0	1	FP	10	7
1418	O1c2c(c(O)c(C\C=C(\CC\C=C(\CC\C=C(\C)/C)/C)/C)c(O)c2)C(=O)C=C1c1ccccc1	C30H34O4	0	1	FP	0	9
1455	O=C(Nc1ccc(cc1)CC[N@@H+]1CCc2c(C1)cccc2)c1cc2c(nc1)cccc2	C27H26N3O+	1	0	FN	1	6
1471	O=C1CC[C@@]2([C@@H]3[C@H]([C@@H]4CC[C@H](O)[C@]4(CC3)C)CCC2=C1)C	C19H28O2	0	1	FP	6	0
1495	O=C1N2[C@@H](Cc3c([nH]c4c3cccc4)[C@@H]2CC)C(=O)N[C@H]1Cc1ccccc1	C23H23N3O2	0	1	FP	3	3
1539	OCCN(CCO)c1nc(N2CCCCC2)c2nc(nc(N3CCCCC3)c2n1)N(CCO)CCO	C24H40N8O4	1	0	FN	0	12
1541	OCCc1ccc(NC(=O)c2cc(NC(=O)c3ccc([N+](=O)[O-])cc3)ccc2)cc1	C22H19N3O5	0	1	FP	0	9
1546	OCCc1ccc(NC(=O)c2ccccc2NC(=O)C2CCCCC2)cc1	C22H26N2O3	0	1	FP	0	8
1565	Oc1cc(O)ccc1C(=O)\C=C\c1ccccc1	C15H12O3	0	1	FP	0	3
1577	Oc1ccc(cc1)/C(=C(\CC)/c1ccc(O)cc1)/CC	C18H20O2	1	0	FN	0	4
1587	Oc1n(c2c(cccc2)c1N=Nc1ncccc1)CCCC	C17H18N4O	1	0	FN	0	5
1606	S(=O)(=O)(Nc1cc2cc([nH]c2cc1)C(=O)N1CCN(CC1)c1ncccc1NC(C)C)C	C22H28N6O3S	1	0	FN	0	7
1657	S1c2c(cc(cc2)C(F)(F)F)\C(\c2c1cccc2)=C/CC[NH+]1CC[NH+](CC1)CCO	C23H27F3N2OS+2	1	0	FN	0	6
1679	[NH+]1(CCN(CC1)c1nc(nc2c1cccc2)-c1ncccc1)Cc1ccccc1	C24H24N5+	0	1	FP	0	4
1806	s1ccc(NCc2ccccc2[N+](=O)[O-])c1C(=O)Nc1ccc(OC(F)(F)F)cc1	C19H14F3N3O4S	1	0	FN	0	9
2691	O=C1N(C(=Nc2c1cccc2)\C=C\c1c2c(n(c1)C)cccc2)c1cc([N+](=O)[O-])ccc1	C25H18N4O3	0	1	FP	0	4
2695	Oc1ccccc1-c1nc(cc(n1)Nc1ccc(cc1)C(OCC)=O)C	C20H19N3O3	0	1	FP	0	6
2755	s1cccc1-c1nc(Nc2cc(OC)ccc2)c2c(n1)cccc2	C19H15N3OS	0	1	FP	0	4
athe observation of the molecule, 1 for inhibitor and 0 for non-inhibitor; bthe predictions given by the SVM model, 1 for inhibitor and 0 for non-inhibitor; cFN represents false negatives, FP represents the false positives; dthe number of ﬂexible rotatable bonds.
